# Supplementary material
Source: publisher figshare collection journal article supplement (https://acs.figshare.com/ndownloader/files/3891943)
Supplement: Supplementary file 1 [file 3891943]

## Sheet: MCF7_Ctrl_01
Accession	Description	Score	Coverage	# Proteins	# Unique Peptides	# Peptides	# PSMs	Area	# AAs	MW [kDa]	calc. pI
119395750	keratin, type II cytoskeletal 1 [Homo sapiens]	1761.57	52.33	4	28	33	121	5.04536e+08	644	65.999	8.11865
	A4	Sequence	# PSMs	# Proteins	# Protein Groups	Protein Group Accessions	Modifications	ΔCn	Area	q-Value	PEP	IonScore	Exp Value	Charge	MH+ [Da]	ΔM [ppm]	RT [min]	# Missed Cleavages
	High	FSScGGGGGSFGAGGGFGSR	4	1	1	119395750	C4(Carbamidomethyl)	0	2.71974e+07	0	4.20583e-16	118.68	2.74426e-11	2	1765.74	0.192396	39.6795	0
	High	QISNLQQSISDAEQR	6	1	1	119395750		0	8.09617e+07	0	4.206e-16	98.08	7.93542e-09	2	1716.85	0.747467	44.4007	0
	High	FLEQQNQVLQTK	4	3	3	47132620;119395750;194018511		0	4.89323e+08	0	0.0002504	84.12	1.84528e-07	2	1475.78	-0.74131	37.8486	0
	High	SLDLDSIIAEVK	7	1	1	119395750		0	2.00872e+08	0	2.873e-13	76.19	1.15169e-06	2	1302.72	-0.0428418	67.6848	0
	High	LNDLEDALQQAK	6	1	1	119395750		0	67977090	0	0.0002504	71.89	2.90567e-06	2	1357.7	2.06577	49.733	0
	High	YEELQITAGR	12	2	2	119395750;119703753		0	4.1939e+08	0	8.102e-14	68.01	7.80346e-06	2	1179.6	0.241019	38.6207	0
	High	GGGGGGYGSGGSSYGSGGGSYGSGGGGGGGR	4	1	1	119395750		0	7.4764e+07	0	4.206e-16	67.75	1.91384e-06	3	2383.95	0.959115	22.6339	0
	High	NKLNDLEDALQQAK	1	1	1	119395750		0	2.55845e+06	0	2.546e-05	64.54	1.64179e-05	2	1599.83	0.175439	53.3849	1
	High	TNAENEFVTIK	5	1	1	119395750		0	6.04895e+08	0	2.468e-06	62.89	2.43914e-05	2	1265.64	0.284079	42.1943	0
	High	TNAENEFVTIKK	2	1	1	119395750		0	1.01479e+08	0	3.195e-07	62.58	2.25524e-05	2	1393.73	0.346059	33.6428	1
	High	SGGGFSSGSAGIINYQR	2	1	1	119395750		0	9.76048e+07	0	2.573e-12	60.35	4.53444e-05	2	1657.79	0.118904	44.1339	0
	High	SLVNLGGSK	2	1	1	119395750		0	1.43271e+08	0	0.0005067	58.59	7.24989e-05	1	874.501	1.91569	33.4469	0
	High	NMQDMVEDYR	1	1	1	119395750		0	7.78752e+07	0	0.0002504	58.34	1.72935e-05	2	1300.53	1.03201	43.7363	0
	High	GSGGGSSGGSIGGR	4	1	1	119395750		0	6.60466e+06	0	3.679e-07	58.09	4.30011e-05	2	1092.5	0.730806	8.40689	0
	High	AEAESLYQSK	3	1	1	119395750		0	1.36492e+08	0	0.0002504	56.84	7.51461e-05	2	1125.54	1.41224	23.8677	0
	High	KQISNLQQSISDAEQR	1	1	1	119395750		0	478452	0	1.337e-06	54.81	0.00016948	2	1844.94	-1.22283	39.124	1
	High	LALDLEIATYR	2	10	4	119395750;125628632;331999954;372466577		0	1.41478e+07	0	4.892e-06	51.83	0.000189298	2	1277.71	2.84833	63.0594	0
	High	SLNNQFASFIDKVR	1	1	1	119395750		0	705912	0	0.0002504	51.12	0.000337661	2	1638.86	2.31487	63.1415	1
	High	DVDGAYMTK	1	1	1	119395750		0	1.1014e+06	0	0.000197	50.31	0.000179704	1	999.447	2.04547	23.8069	0
	High	DYQELMNTK	3	1	1	119395750		0	2.44945e+07	0	0.0002504	48.93	0.000332639	1	1141.52	-1.41831	36.6955	0
	High	NmQDmVEDYR	8	1	1	119395750	M2(Oxidation); M5(Oxidation)	0	4.50412e+06	0	0.0002504	48.34	0.000120908	2	1332.52	-0.0634299	23.269	0
	High	SLNNQFASFIDK	5	1	1	119395750		0	2.77293e+08	0	1.04e-06	43.04	0.00202361	2	1383.69	2.28934	57.4017	0
	High	DYQELmNTK	3	1	1	119395750	M6(Oxidation)	0	1.43455e+07	0	0.0002504	41.31	0.00163453	2	1157.51	-0.655626	23.2551	0
	High	NMQDmVEDYR	14	1	1	119395750	M5(Oxidation)	0	4.01864e+07	0	0.0002504	40.36	0.000929654	2	1316.53	1.35849	33.5194	0
	High	mSGEcAPNVSVSVSTSHTTISGGGSR	1	1	1	119395750	M1(Oxidation); C5(Carbamidomethyl)	0	3.47865e+06	0	1.436e-15	36.15	0.00822621	3	2581.16	-0.584166	36.6373	0
	High	AQYEDIAQK	3	1	1	119395750		0	1.77433e+08	0	0.0002504	34.84	0.0138292	1	1065.52	0.885422	22.4225	0
	High	WELLQQVDTSTR	2	1	1	119395750		0	1.70757e+07	0	0.0002504	32.55	0.029185	2	1475.75	2.32128	55.1115	0
	High	GGSGGGGGGSSGGRGSGGGSSGGSIGGR	1	1	1	119395750		0	1.65055e+06	0	0.000256	17.91	0.499987	3	2079.91	-0.465783	9.0444	1
	High	SKAEAESLYQSK	2	1	1	119395750		0	1.30564e+08	0	0.001838	15.57	1.15925	3	1340.67	1.43656	21.1375	1
	High	IEISELNR	3	2	2	47132620;119395750		0	1.82538e+08	0.001	0.001838	39.9	0.00511646	2	973.532	0.717717	37.3896	0
	High	DVDGAYmTK	1	1	1	119395750	M7(Oxidation)	0	0	0.003	0.02451	10.9	1.16641	2	1015.44	0.816658	21.3528	0
	High	RTNAENEFVTIK	2	1	1	119395750		0	4.35727e+06	0.004	0.04167	22.67	0.264699	2	1421.74	-1.06721	36.4286	1
	High	LRSEIDNVKK	1	1	1	119395750		0	5.6568e+06	0.005	0.04184	25.55	0.088738	3	1201.69	0.0543349	15.7356	2
	High	TLLEGEESR	1	1	1	119395750		0	1.30841e+06	0.007	0.06534	20.43	0.441545	1	1033.52	1.21207	25.6468	0
	High	NKYEDEINKR	1	7	5	119395750;119703753;5031839;119395754;372466577		0	2.04089e+07	0.008	0.08602	19.85	0.478236	3	1308.65	-0.000603853	19.1384	2
	Medium	SISISVAR	1	1	1	119395750		0	4.40484e+07	0.024	0.2419	23.9	0.143805	2	832.489	0.029784	34.224	0
	Medium	LRSEIDNVK	1	1	1	119395750		0	1.31118e+07	0.034	0.2583	20.95	0.364801	2	1073.6	1.26656	20.2296	1
47132620	keratin, type II cytoskeletal 2 epidermal [Homo sapiens]	1119.35	55.09	2	23	30	70	2.97626e+08	639	65.3932	8.00146
	A4	Sequence	# PSMs	# Proteins	# Protein Groups	Protein Group Accessions	Modifications	ΔCn	Area	q-Value	PEP	IonScore	Exp Value	Charge	MH+ [Da]	ΔM [ppm]	RT [min]	# Missed Cleavages
	High	GSSSGGGYSSGSSSYGSGGR	2	1	1	47132620		0	4.7766e+07	0	4.206e-16	106.63	3.02005e-10	2	1740.71	0.340699	16.1335	0
	High	GGSGGGGSISGGGYGSGGGSGGR	7	1	1	47132620		0	2.99481e+07	0	4.206e-16	94.13	9.94895e-09	2	1741.75	1.34967	18.0047	0
	High	FLEQQNQVLQTK	4	3	3	47132620;119395750;194018511		0	4.89323e+08	0	0.0002504	84.12	1.84528e-07	2	1475.78	-0.74131	37.8486	0
	High	GFSSGSAVVSGGSR	2	1	1	47132620		0	2.21017e+08	0	4.206e-16	82.95	1.85559e-07	2	1254.61	1.73231	26.8675	0
	High	TSQNSELNNMQDLVEDYK	2	1	1	47132620		0	1.18954e+07	0	4.206e-16	82.34	2.26377e-07	2	2127.95	1.4997	60.5873	0
	High	TSQNSELNNmQDLVEDYK	1	1	1	47132620	M10(Oxidation)	0	3.01157e+06	0	4.206e-16	80.85	3.20264e-07	2	2143.94	-0.694667	42.2061	0
	High	HGGGGGGFGGGGFGSR	2	1	1	47132620		0	5.24143e+07	0	1.261e-15	79.31	2.60227e-07	2	1320.59	1.86542	26.6279	0
	High	NLDLDSIIAEVK	3	7	4	47132620;119703753;5031839;119395754		0	6.73311e+07	0	2.729e-13	73.91	1.57903e-06	2	1329.73	-0.344254	67.4276	0
	High	NVQDAIADAEQR	3	1	1	47132620		0	4.15023e+07	0	8.635e-05	70.78	3.30899e-06	2	1329.64	0.129859	38.0856	0
	High	GGSSSGGGYGSGGGGSSSVK	2	1	1	47132620		0	1.36984e+07	0	2.956e-14	67.48	3.76949e-06	2	1588.69	1.26589	12.025	0
	High	YEELQVTVGR	5	1	1	47132620		0	6.46257e+07	0	3.86e-08	65.6	1.32478e-05	2	1193.62	1.75128	40.3421	0
	High	LNDLEEALQQAK	2	1	1	47132620		0	3.25242e+07	0	2.635e-13	64.47	1.56843e-05	2	1371.71	1.84846	53.7755	0
	High	SKEEAEALYHSK	2	1	1	47132620		0	1.23164e+07	0	1.176e-10	58.87	6.53778e-05	2	1391.68	-0.320621	18.8552	1
	High	YLDGLTAER	6	1	1	47132620		0	94693126	0	0.0002315	54.52	0.000144452	2	1037.53	-0.303409	38.0834	0
	High	TAAENDFVTLK	2	1	1	47132620		0	7.84524e+06	0	5.998e-07	47.9	0.000746844	2	1208.62	1.18631	41.0071	0
	High	AQYEEIAQR	3	6	4	47132620;119703753;5031839;331999954		0	1.33623e+08	0	0.0002504	47.33	0.000726763	2	1107.54	-0.271919	25.0302	0
	High	TAAENDFVTLKK	1	1	1	47132620		0	2.04764e+07	0	3.614e-06	41.19	0.00310593	2	1336.71	-2.03177	33.9159	1
	High	DVDNAYMIK	1	1	1	47132620		0	0	0	0.0002504	36.95	0.00729639	1	1068.5	-0.703746	36.3848	0
	High	TSQNSELNNMQDLVEDYKK	1	1	1	47132620		0	2.19053e+07	0	0.0002504	35.98	0.0131095	3	2256.05	0.191474	56.6229	1
	High	SLVGLGGTK	2	1	1	47132620		0	2.67663e+07	0	0.0003204	32.17	0.0231167	1	831.494	0.120288	32.4515	0
	High	GGSISGGGYGSGGGK	1	1	1	47132620		0	231652	0	0.0002504	23.66	0.144657	1	1197.55	0.848248	15.148	0
	High	GGGFGGGSSFGGGSGFSGGGFGGGGFGGGR	1	1	1	47132620		0	0	0	0.0001882	10.71	1.92764	2	2399.01	-3.04427	59.4877	0
	High	IEISELNR	3	2	2	47132620;119395750		0	1.82538e+08	0.001	0.001838	39.9	0.00511646	2	973.532	0.717717	37.3896	0
	High	STSSFScLSR	1	1	1	47132620	C7(Carbamidomethyl)	0	2.39344e+07	0.001	0.001838	15.9	0.524361	2	1131.51	-0.539419	31.2608	0
	High	LQGEIAHVK	2	1	1	47132620		0	1.73312e+07	0.002	0.001838	28.39	0.0354225	2	994.569	1.27814	20.2318	0
	High	FASFIDK	3	20	9	47132620;28173564;119703753;5031839;119395754;109148552;194018511;331999954;372466577		0	3.1646e+07	0.002	0.01203	23.81	0.0971151	2	827.43	0.04335	40.8821	0
	High	DVDNAYmIK	1	1	1	47132620	M7(Oxidation)	0	4.20356e+06	0.003	0.01957	24.62	0.100092	2	1084.5	1.3379	29.7766	0
	High	VDPEIQNVK	1	1	1	47132620		0	1.01841e+06	0.003	0.02341	22.92	0.138857	1	1041.56	-0.522731	25.9985	0
	High	DYQELMNVK	1	4	2	47132620;109148552		0	4.38198e+06	0.004	0.04108	25.75	0.100176	2	1139.54	1.20242	43.7525	0
	High	KYEDEINKR	1	3	2	47132620;109148552		0	5.01671e+06	0.007	0.06049	35.15	0.0136249	3	1194.61	0.0690853	14.208	2
	High	AAFGGSGGR	1	1	1	47132620		0	0	0.008	0.07803	16.83	0.705471	2	779.377	-2.93367	10.8441	0
	Medium	scQIScK	1	1	1	47132620	N-Term(Acetyl); C2(Carbamidomethyl); C6(Carbamidomethyl)	0	376147	0.015	0.1353	13.06	0.855157	1	924.392	0.752445	16.4265	0
195972866	keratin, type I cytoskeletal 10 [Homo sapiens]	1035.36	44.18	13	23	27	73	3.00399e+08	584	58.7656	5.21143
	A4	Sequence	# PSMs	# Proteins	# Protein Groups	Protein Group Accessions	Modifications	ΔCn	Area	q-Value	PEP	IonScore	Exp Value	Charge	MH+ [Da]	ΔM [ppm]	RT [min]	# Missed Cleavages
	High	GSLGGGFSSGGFSGGSFSR	3	1	1	195972866		0	1.04e+08	0	1.024e-15	109.66	4.87186e-10	2	1707.77	0.948609	51.8294	0
	High	NVQALEIELQSQLALK	2	1	1	195972866		0	9.83787e+06	0	4.206e-16	87.24	3.11519e-08	2	1797.01	-0.722158	67.4202	0
	High	SGGGGGGGGcGGGGGVSSLR	1	1	1	195972866	C10(Carbamidomethyl)	0	1.14601e+07	0	4.206e-16	84.33	8.80012e-08	2	1549.68	-0.165033	20.6156	0
	High	ALEESNYELEGK	2	1	1	195972866		0	1.7575e+08	0	3.334e-15	81.54	2.92858e-07	2	1381.64	-2.37126	33.9112	0
	High	SLLEGEGSSGGGGR	3	1	1	195972866		0	1.50395e+08	0	6.402e-13	67.73	5.9704e-06	2	1262.6	-0.189984	25.028	0
	High	SQYEQLAEQNR	6	1	1	195972866		0	4.9038e+08	0	2.479e-08	64.96	1.27502e-05	2	1365.64	-1.1924	26.0718	0
	High	QSVEADINGLR	6	4	1	195972866		0	1.75254e+08	0	0.0002504	60.96	3.41114e-05	2	1201.62	2.26307	41.5404	0
	High	AETEcQNTEYQQLLDIK	2	1	1	195972866	C5(Carbamidomethyl)	0	1.53653e+07	0	1.538e-13	60.38	4.67272e-05	2	2082.96	-0.00189694	57.6923	0
	High	VTMQNLNDR	4	7	3	24430192;195972866;15431310		0	1.61915e+08	0	0.0002892	58.74	6.06146e-05	2	1090.53	-1.08988	26.1694	0
	High	VTmQNLNDR	12	7	3	24430192;195972866;15431310	M3(Oxidation)	0	1.16605e+08	0	5.079e-05	57.3	7.11317e-05	2	1106.53	1.31497	12.3135	0
	High	ELTTEIDNNIEQISSYK	2	1	1	195972866		0	4.86277e+06	0	3.491e-15	57.03	0.000108489	2	1996.97	-0.380004	57.6731	0
	High	LENEIQTYR	2	1	1	195972866		0	2.21707e+08	0	9.643e-06	51.9	0.000304426	2	1165.59	0.588131	30.9617	0
	High	VLDELTLTK	2	1	1	195972866		0	1.8911e+08	0	0.0002504	45.09	0.000964846	2	1031.6	0.674024	45.3374	0
	High	NVSTGDVNVEmNAAPGVDLTQLLNNmR	2	1	1	195972866	M11(Oxidation); M26(Oxidation)	0	1.18077e+08	0	4.206e-16	40.3	0.00541287	3	2904.38	0.221964	63.7157	0
	High	KDAEAWFNEK	2	2	1	195972866		0	1.28717e+07	0	0.0003675	37.19	0.00650305	2	1237.59	0.233767	37.5054	1
	High	DAEAWFNEK	4	4	1	195972866		0	8.96109e+07	0	0.000303	31.74	0.017618	2	1109.49	0.700217	48.609	0
	High	LKYENEVALR	1	1	1	195972866		0	4.13534e+06	0	0.001838	23.2	0.156512	2	1234.68	0.941199	29.396	1
	High	QSLEASLAETEGR	1	1	1	195972866		0	1.24624e+06	0	0.001838	12.69	2.60792	2	1390.68	1.42205	41.0811	0
	High	SQYEQLAEQNRK	2	1	1	195972866		0	5.5663e+07	0.002	0.01411	50.45	0.000462506	2	1493.73	-0.27246	22.7716	1
	High	LAADDFR	3	18	6	4557701;40354195;195972866;24430192;15431310;24234699		0	7.44262e+06	0.002	0.001838	32.31	0.0238227	2	807.399	-0.765322	31.0649	0
	High	SEITELRR	1	1	1	195972866		0	3.7561e+07	0.002	0.003848	19.53	0.552133	2	1003.55	0.625015	23.5952	1
	High	YENEVALR	2	1	1	195972866		0	93523084	0.002	0.002164	17.65	0.814289	1	993.502	1.51443	27.9226	0
	High	LASYLDK	3	8	6	55956899;4557701;24430192;195972866;15431310;24234699		0	1.0804e+08	0.003	0.03207	33.1	0.0136648	2	809.441	1.3374	27.5555	0
	High	QSVEADINGLRR	1	3	1	195972866		0	3.28176e+07	0.003	0.01879	21.57	0.308954	2	1357.72	-0.368459	38.7538	1
	High	LASYLDKVR	1	7	5	4557701;24430192;195972866;15431310;24234699		0	2.57006e+06	0.004	0.03712	36.47	0.00471136	2	1064.61	0.687577	30.1952	1
	High	RVLDELTLTK	1	1	1	195972866		0	4.61702e+06	0.009	0.09518	25.19	0.0855103	2	1187.69	-4.38651	42.9926	1
	Medium	IRLENEIQTYR	1	1	1	195972866		0	8.61799e+06	0.014	0.1229	25.84	0.108807	3	1434.77	0.78096	41.1434	1
	Medium	IKEWYEK	1	1	1	195972866		0	6.05486e+07	0.017	0.1488	21.52	0.23431	2	995.521	1.78764	28.6319	1
55956899	keratin, type I cytoskeletal 9 [Homo sapiens]	1008.47	53.93	1	24	25	79	2.8252e+08	623	62.0268	5.23682
	A4	Sequence	# PSMs	# Proteins	# Protein Groups	Protein Group Accessions	Modifications	ΔCn	Area	q-Value	PEP	IonScore	Exp Value	Charge	MH+ [Da]	ΔM [ppm]	RT [min]	# Missed Cleavages
	High	GGSGGSYGGGGSGGGYGGGSGSR	9	1	1	55956899		0	1.3604e+08	0	4.206e-16	103.94	5.20703e-10	2	1791.73	-0.187924	15.9025	0
	High	VQALEEANNDLENK	1	1	1	55956899		0	6.20978e+07	0	4.206e-16	95.41	1.32073e-08	2	1586.76	-0.575506	36.4167	0
	High	SDLEmQYETLQEELmALK	2	1	1	55956899	M5(Oxidation); M15(Oxidation)	0	4.34391e+06	0	3.389e-10	87.07	9.14926e-08	2	2203.02	1.16029	69.28	0
	High	HGVQELEIELQSQLSK	1	1	1	55956899		0	1.55821e+07	0	4.073e-13	77.9	7.10353e-07	2	1837.97	0.204907	61.0857	0
	High	DIENQYETQITQIEHEVSSSGQEVQSSAK	2	1	1	55956899		0	4.84165e+07	0	7.12e-13	77.23	1.1004e-06	3	3264.52	2.18102	65.4348	0
	High	FSSSSGYGGGSSR	6	1	1	55956899		0	3.12963e+08	0	1.664e-14	66.27	3.41089e-06	2	1235.53	-1.8992	17.039	0
	High	QGVDADINGLR	3	1	1	55956899		0	1.18893e+08	0	7.082e-09	62.1	2.12417e-05	2	1157.59	0.947928	37.3874	0
	High	EIETYHNLLEGGQEDFESSGAGK	1	1	1	55956899		0	4.49663e+07	0	1.295e-14	53.77	0.000164965	3	2510.13	0.656036	54.1745	0
	High	STMQELNSR	2	1	1	55956899		0	1.01748e+08	0	0.0002504	52.93	0.000171899	2	1065.5	0.510773	21.6388	0
	High	QVLDNLTmEK	4	1	1	55956899	M8(Oxidation)	0	6.28377e+07	0	0.0003112	45.72	0.00138379	2	1206.6	-0.171736	35.6123	0
	High	STmQELNSR	10	1	1	55956899	M3(Oxidation)	0	5.2846e+06	0	0.0002504	44.41	0.000992546	2	1081.49	-0.212804	19.1264	0
	High	SDLEMQYETLQEELmALK	1	1	1	55956899	M15(Oxidation)	0	1.28097e+06	0	1.799e-08	38.28	0.00797947	2	2187.02	1.18796	69.5571	0
	High	FEmEQNLR	2	1	1	55956899	M3(Oxidation)	0	2.07496e+07	0	0.0002504	37.99	0.00462267	2	1082.49	-0.449619	22.7669	0
	High	SGGGGGGGLGSGGSIR	3	1	1	55956899		0	3.67775e+08	0	4.281e-08	36.78	0.00840625	2	1232.6	1.82862	21.2635	0
	High	NYSPYYNTIDDLK	1	1	1	55956899		0	5.54456e+06	0	2.788e-05	35.26	0.0108269	2	1605.74	-0.342515	52.987	0
	High	GGGGSFGYSYGGGSGGGFSASSLGGGFGGGSR	1	1	1	55956899		0	6.63867e+06	0	4.206e-16	31.85	0.0182223	3	2705.16	0.442636	59.1375	0
	High	GGSGGSHGGGSGFGGESGGSYGGGEEASGSGGGYGGGSGK	1	1	1	55956899		0	4.18822e+06	0	1.46e-14	28.06	0.0180544	3	3223.29	1.69183	27.5763	0
	High	KDIENQYETQITQIEHEVSSSGQEVQSSAK	1	1	1	55956899		0	6.88069e+06	0	3.518e-15	12.72	2.80379	4	3392.61	-0.0459663	62.1673	1
	High	QEYEQLIAK	3	1	1	55956899		0	1.66823e+08	0.001	0.001838	47.32	0.000921205	2	1121.58	0.359085	36.2292	0
	High	TLNDmRQEYEQLIAK	2	1	1	55956899	M5(Oxidation)	0	1.01021e+07	0.002	0.001865	44.98	0.00163927	2	1867.92	-0.911541	45.8717	1
	High	mTLDDFR	3	1	1	55956899	M1(Oxidation)	0	4.57406e+07	0.002	0.001838	37.5	0.00274744	2	913.41	1.7237	32.8466	0
	High	TLLDIDNTR	3	1	1	55956899		0	1.53085e+08	0.002	0.001838	32.64	0.032044	2	1060.56	-0.997435	43.0974	0
	High	IKFEmEQNLR	3	1	1	55956899	M5(Oxidation)	0	2.79582e+07	0.002	0.001859	23.37	0.195149	3	1323.67	0.61853	31.8946	1
	High	FSSSGGGGGGGR	2	1	1	55956899		0	1.00588e+06	0.002	0.001838	21.88	0.163132	2	982.435	1.18256	7.04215	0
	High	QVLDNLTMEK	2	1	1	55956899		0	2.76509e+07	0.002	0.005572	19.9	0.515228	2	1190.61	-1.26661	41.8141	0
	High	LASYLDK	3	8	6	55956899;4557701;24430192;195972866;15431310;24234699		0	1.0804e+08	0.003	0.03207	33.1	0.0136648	2	809.441	1.3374	27.5555	0
	High	FEMEQNLR	3	1	1	55956899		0	4.6994e+07	0.004	0.03863	12.35	2.31677	1	1066.5	-0.576105	36.6591	0
	High	SDLEmQYETLQEELmALKK	1	1	1	55956899	M5(Oxidation); M15(Oxidation)	0	4.39946e+06	0.008	0.08289	10.05	5.25416	3	2331.11	0.279399	66.2421	1
	Medium	IQDWYDK	1	1	1	55956899		0	1.91441e+07	0.012	0.1207	27.27	0.0542811	2	967.454	1.7785	33.3781	0
	Medium	MTLDDFR	1	1	1	55956899		0	4.14018e+07	0.017	0.1441	31.11	0.0197101	2	897.414	0.985024	44.9311	0
	Medium	IKFEMEQNLR	1	1	1	55956899		0	2.23058e+07	0.029	0.2419	17.6	0.808946	2	1307.68	-0.125005	43.2365	1
15431310	keratin, type I cytoskeletal 14 [Homo sapiens]	882.889	52.97	11	7	22	62	1.32867e+08	472	51.5894	5.16064
	A4	Sequence	# PSMs	# Proteins	# Protein Groups	Protein Group Accessions	Modifications	ΔCn	Area	q-Value	PEP	IonScore	Exp Value	Charge	MH+ [Da]	ΔM [ppm]	RT [min]	# Missed Cleavages
	High	GQVGGDVNVEmDAAPGVDLSR	3	1	1	15431310	M11(Oxidation)	0	2.0452e+07	0	2.832e-15	100.18	4.6483e-09	2	2101.99	1.96256	44.6636	0
	High	APSTYGGGLSVSSSR	2	1	1	15431310		0	1.00555e+08	0	4.206e-16	83.62	1.96399e-07	2	1425.7	0.717035	31.8856	0
	High	LLEGEDAHLSSSQFSSGSQSSR	2	1	1	15431310		0	2.6932e+07	0	4.206e-16	74.93	1.57951e-06	3	2309.06	-0.550861	38.7512	0
	High	ALEEANADLEVK	2	5	2	24430192;15431310		0	8.32161e+07	0	0.0002504	67.35	7.34468e-06	2	1301.66	1.28334	36.2269	0
	High	EVATNSELVQSGK	3	2	2	4557701;15431310		0	9.05023e+07	0	2.633e-06	64.56	1.76372e-05	2	1361.69	0.239656	24.4269	0
	High	TmQNLEIELQSQLSmK	2	1	1	15431310	M2(Oxidation); M15(Oxidation)	0	4.26393e+06	0	1.835e-14	60.89	4.30979e-05	2	1924.93	-1.80623	58.4867	0
	High	VTMQNLNDR	4	7	3	24430192;195972866;15431310		0	1.61915e+08	0	0.0002892	58.74	6.06146e-05	2	1090.53	-1.08988	26.1694	0
	High	VTmQNLNDR	12	7	3	24430192;195972866;15431310	M3(Oxidation)	0	1.16605e+08	0	5.079e-05	57.3	7.11317e-05	2	1106.53	1.31497	12.3135	0
	High	VLDELTLAR	5	5	4	4557701;24430192;15431310;24234699		0	1.28645e+08	0	8.945e-05	57.05	8.42225e-05	2	1029.6	2.7059	48.0403	0
	High	MSVEADINGLR	1	2	2	15431310;24234699		0	1.28225e+07	0	0.0002504	56.6	9.39644e-05	2	1204.6	1.15405	48.1736	0
	High	GQVGGDVNVEMDAAPGVDLSR	3	1	1	15431310		0	8.06248e+06	0	1.951e-13	56.13	0.000124816	2	2085.99	0.00807561	51.7264	0
	High	LEQEIATYR	2	9	4	4557701;24430192;15431310;24234699		0	4.85874e+07	0	0.0002582	55.89	0.00012186	2	1122.58	0.784161	31.6171	0
	High	ILTATVDNANVLLQIDNAR	1	1	1	15431310		0	0	0	1.031e-08	48.76	0.0002927	2	2054.12	-0.15306	63.7616	0
	High	DAEEWFFTK	2	1	1	15431310		0	2.90521e+07	0	0.0002504	47.39	0.00046327	1	1172.53	0.380288	60.9651	0
	High	GSCGIGGGIGGGSSR	1	2	2	24430192;15431310		0	1.03275e+07	0	5.486e-15	47.08	0.000674822	2	1221.57	1.59331	28.7767	0
	High	TMQNLEIELQSQLSmK	1	1	1	15431310	M15(Oxidation)	0	852947	0	1.128e-08	46.54	0.00120115	2	1908.94	-0.584396	63.2447	0
	High	ISSVLAGGSCR	1	2	2	24430192;15431310		0	2.17531e+06	0	1.09e-05	33.57	0.0213397	2	1049.54	2.05332	33.3918	0
	High	mSVEADINGLR	1	2	2	15431310;24234699	M1(Oxidation)	0	9.09564e+06	0	0.0002504	27.39	0.0804338	2	1220.59	-1.99573	42.4689	0
	High	NHEEEMNALR	1	2	2	4557701;15431310		0	9.68796e+06	0	0.0002504	23.7	0.0934209	2	1242.55	0.923572	22.4109	0
	High	GScGIGGGIGGGSSR	1	2	2	24430192;15431310	C3(Carbamidomethyl)	0	7.54421e+06	0	0.00038	17.78	0.541855	2	1278.59	0.77441	23.52	0
	High	LAADDFR	3	18	6	4557701;40354195;195972866;24430192;15431310;24234699		0	7.44262e+06	0.002	0.001838	32.31	0.0238227	2	807.399	-0.765322	31.0649	0
	High	QFTSSSSMK	1	2	2	24430192;15431310		0	8.00979e+06	0.002	0.007029	20.67	0.158123	2	1002.46	-0.191649	16.9168	0
	High	SEISELR	1	2	2	4557701;15431310		0	0	0.002	0.001838	18.44	0.628014	2	833.437	0.691051	27.0351	0
	High	ISSVLAGGScR	1	2	2	24430192;15431310	C10(Carbamidomethyl)	0	9.49885e+06	0.002	0.001838	17.89	0.840409	2	1106.56	-0.460998	28.0264	0
	High	LASYLDK	3	8	6	55956899;4557701;24430192;195972866;15431310;24234699		0	1.0804e+08	0.003	0.03207	33.1	0.0136648	2	809.441	1.3374	27.5555	0
	High	VVSTHEQVLR	1	1	1	15431310		0	4.36319e+06	0.003	0.02101	15.91	0.612912	2	1167.65	-0.290005	20.8926	0
	High	LASYLDKVR	1	7	5	4557701;24430192;195972866;15431310;24234699		0	2.57006e+06	0.004	0.03712	36.47	0.00471136	2	1064.61	0.687577	30.1952	1
	Medium	IRDWYQR	1	3	3	4557701;24430192;15431310		0	1.66105e+07	0.049	0.5132	26.89	0.089532	2	1036.53	1.60327	29.1204	1
24430192	keratin, type I cytoskeletal 16 [Homo sapiens]	579.986	54.12	11	12	23	60	1.32867e+08	473	51.2362	5.04639
	A4	Sequence	# PSMs	# Proteins	# Protein Groups	Protein Group Accessions	Modifications	ΔCn	Area	q-Value	PEP	IonScore	Exp Value	Charge	MH+ [Da]	ΔM [ppm]	RT [min]	# Missed Cleavages
	High	ALEEANADLEVK	2	5	2	24430192;15431310		0	8.32161e+07	0	0.0002504	67.35	7.34468e-06	2	1301.66	1.28334	36.2269	0
	High	GQTGGDVNVEmDAAPGVDLSR	4	1	1	24430192	M11(Oxidation)	0	2.1314e+07	0	4.206e-16	67.22	8.22222e-06	2	2103.96	1.49088	41.5427	0
	High	APSTYGGGLSVSSR	2	1	1	24430192		0	8.15586e+07	0	2.451e-11	63.84	2.00948e-05	2	1338.67	0.890382	31.8834	0
	High	VTMQNLNDR	4	7	3	24430192;195972866;15431310		0	1.61915e+08	0	0.0002892	58.74	6.06146e-05	2	1090.53	-1.08988	26.1694	0
	High	VTmQNLNDR	12	7	3	24430192;195972866;15431310	M3(Oxidation)	0	1.16605e+08	0	5.079e-05	57.3	7.11317e-05	2	1106.53	1.31497	12.3135	0
	High	TEELNKEVASNSELVQSSR	2	1	1	24430192		0	9.41083e+06	0	7.592e-05	57.19	9.96943e-05	2	2120.05	-0.342098	37.1393	1
	High	VLDELTLAR	5	5	4	4557701;24430192;15431310;24234699		0	1.28645e+08	0	8.945e-05	57.05	8.42225e-05	2	1029.6	2.7059	48.0403	0
	High	LEQEIATYR	2	9	4	4557701;24430192;15431310;24234699		0	4.85874e+07	0	0.0002582	55.89	0.00012186	2	1122.58	0.784161	31.6171	0
	High	IIAATIENAQPILQIDNAR	1	1	1	24430192		0	3.33053e+06	0	1.414e-10	53.89	7.49266e-05	2	2064.15	0.326581	61.886	0
	High	GSCGIGGGIGGGSSR	1	2	2	24430192;15431310		0	1.03275e+07	0	5.486e-15	47.08	0.000674822	2	1221.57	1.59331	28.7767	0
	High	EVFTSSSSSSSR	2	1	1	24430192		0	3.26785e+07	0	0.0002504	44.77	0.000700195	2	1260.57	-1.78534	17.0412	0
	High	GQTGGDVNVEMDAAPGVDLSR	2	1	1	24430192		0	1.31537e+07	0	0.0002504	43.79	0.00206617	2	2087.97	-0.114584	48.6065	0
	High	DAETWFLSK	3	1	1	24430192		0	2.41308e+07	0	0.0007115	33.61	0.017268	2	1096.53	-0.286406	58.0613	0
	High	ISSVLAGGSCR	1	2	2	24430192;15431310		0	2.17531e+06	0	1.09e-05	33.57	0.0213397	2	1049.54	2.05332	33.3918	0
	High	LLEGEDAHLSSQQASGQSYSSR	1	1	1	24430192		0	1.51699e+07	0	0.0002504	30.92	0.0387152	3	2350.09	0.424078	32.7155	0
	High	GScGIGGGIGGGSSR	1	2	2	24430192;15431310	C3(Carbamidomethyl)	0	7.54421e+06	0	0.00038	17.78	0.541855	2	1278.59	0.77441	23.52	0
	High	VLQGLEIELQSQLSmK	1	1	1	24430192	M15(Oxidation)	0	378360	0	0.0002504	12.89	1.84799	2	1831.99	2.32108	63.9489	0
	High	NHEEEMLALR	1	1	1	24430192		0	7.15361e+06	0.001	0.001838	29.01	0.0413234	2	1241.59	0.430842	37.5032	0
	High	YEHELALR	1	1	1	24430192		0	5.19797e+06	0.001	0.001838	22.45	0.232945	2	1030.53	0.841314	28.2657	0
	High	LAADDFR	3	18	6	4557701;40354195;195972866;24430192;15431310;24234699		0	7.44262e+06	0.002	0.001838	32.31	0.0238227	2	807.399	-0.765322	31.0649	0
	High	QFTSSSSMK	1	2	2	24430192;15431310		0	8.00979e+06	0.002	0.007029	20.67	0.158123	2	1002.46	-0.191649	16.9168	0
	High	ISSVLAGGScR	1	2	2	24430192;15431310	C10(Carbamidomethyl)	0	9.49885e+06	0.002	0.001838	17.89	0.840409	2	1106.56	-0.460998	28.0264	0
	High	LASYLDK	3	8	6	55956899;4557701;24430192;195972866;15431310;24234699		0	1.0804e+08	0.003	0.03207	33.1	0.0136648	2	809.441	1.3374	27.5555	0
	High	SEVTELR	1	1	1	24430192		0	751358	0.003	0.02345	19.11	0.538232	2	833.437	0.691051	22.018	0
	High	LASYLDKVR	1	7	5	4557701;24430192;195972866;15431310;24234699		0	2.57006e+06	0.004	0.03712	36.47	0.00471136	2	1064.61	0.687577	30.1952	1
	High	TKYEHELALR	1	1	1	24430192		0	1.19617e+06	0.009	0.1019	20.69	0.373658	2	1259.68	1.40646	27.0083	1
	Medium	IRDWYQR	1	3	3	4557701;24430192;15431310		0	1.66105e+07	0.049	0.5132	26.89	0.089532	2	1036.53	1.60327	29.1204	1
119703753	keratin, type II cytoskeletal 6B [Homo sapiens]	559.162	43.79	2	4	21	48	2.1181e+08	564	60.0303	8.00146
	A4	Sequence	# PSMs	# Proteins	# Protein Groups	Protein Group Accessions	Modifications	ΔCn	Area	q-Value	PEP	IonScore	Exp Value	Charge	MH+ [Da]	ΔM [ppm]	RT [min]	# Missed Cleavages
	High	ISIGGGScAISGGYGSR	1	3	2	119703753;5031839	C8(Carbamidomethyl)	0	6.33324e+06	0	4.311e-14	91.01	3.57418e-08	2	1598.76	1.29648	41.1457	0
	High	NLDLDSIIAEVK	3	7	4	47132620;119703753;5031839;119395754		0	6.73311e+07	0	2.729e-13	73.91	1.57903e-06	2	1329.73	-0.344254	67.4276	0
	High	SGFSSISVSR	3	2	1	119703753		0	22632008	0	0.0002504	72.42	1.94751e-06	2	1026.52	-1.38738	36.3128	0
	High	ATGGGLSSVGGGSSTIK	1	1	1	119703753		0	2.04756e+07	0	4.785e-11	70.11	4.73845e-06	2	1435.74	1.03826	30.4386	0
	High	ISIGGGSCAISGGYGSR	1	3	2	119703753;5031839		0	2.2109e+06	0	3.152e-12	70.05	4.05307e-06	2	1541.74	1.01451	46.7251	0
	High	YEELQITAGR	12	2	2	119395750;119703753		0	4.1939e+08	0	8.102e-14	68.01	7.80346e-06	2	1179.6	0.241019	38.6207	0
	High	ADTLTDEINFLR	1	3	2	119703753;5031839		0	6.76334e+07	0	1.695e-05	61.16	3.4069e-05	2	1407.71	0.153597	63.3178	0
	High	AEAESWYQTK	3	4	2	119703753;5031839		0	3.12433e+07	0	0.0002504	51.03	0.00025638	2	1212.56	1.58344	32.2019	0
	High	AQYEEIAQR	3	6	4	47132620;119703753;5031839;331999954		0	1.33623e+08	0	0.0002504	47.33	0.000726763	2	1107.54	-0.271919	25.0302	0
	High	WTLLQEQGTK	2	4	3	119703753;5031839;119395754		0	8.24154e+07	0	0.0002504	44.57	0.00189758	2	1203.64	0.833873	46.9757	0
	High	LEGLEDALQK	1	3	2	119703753;5031839		0	3.63588e+06	0	0.0002504	43.99	0.00171182	2	1115.6	0.716274	44.4079	0
	High	DVDAAYMNK	2	7	3	119703753;5031839;119395754		0	4.48262e+06	0	0.0002504	41.74	0.00135317	2	1026.46	-0.49422	24.659	0
	High	NMQDLVEDLK	1	2	1	119703753		0	4.3567e+06	0	0.0003001	35.57	0.0102752	2	1204.59	1.36465	57.5319	0
	High	GSGGLGGAcGGAGFGSR	1	3	2	119703753;5031839	C9(Carbamidomethyl)	0	8.2894e+06	0	6.318e-09	33.26	0.0121084	2	1424.63	-1.14394	30.8377	0
	High	QNLEPLFEQYINNLR	1	4	3	119703753;5031839;119395754		0	1.95356e+06	0	3.676e-06	29.63	0.0607623	2	1890.97	0.436805	70.3737	0
	High	ALYDAELSQmQTHISDTSVVLSmDNNR	1	3	2	119703753;5031839	M10(Oxidation); M23(Oxidation)	0	2.42503e+06	0	7.775e-09	25.34	0.140944	3	3070.41	0.657492	53.9208	0
	High	QLDNIVGER	2	1	1	119703753		0	1.48235e+07	0.002	0.009464	31.48	0.0279507	2	1043.55	1.8428	33.1202	0
	High	EYQELMNVK	2	5	3	119703753;5031839;372466577		0	1.41548e+07	0.002	0.001839	29.07	0.0471362	2	1153.56	1.16614	39.5505	0
	High	FASFIDK	3	20	9	47132620;28173564;119703753;5031839;119395754;109148552;194018511;331999954;372466577		0	3.1646e+07	0.002	0.01203	23.81	0.0971151	2	827.43	0.04335	40.8821	0
	High	GRLDSELR	1	5	3	119703753;5031839;119395754		0	621044	0.002	0.007729	20.34	0.556668	2	945.512	0.910892	17.6177	1
	High	SLYGLGGSK	2	3	2	119703753;5031839		0	4.32471e+06	0.005	0.04422	16.35	0.645394	1	881.471	-1.55056	34.2844	0
	High	NKYEDEINKR	1	7	5	119395750;119703753;5031839;119395754;372466577		0	2.04089e+07	0.008	0.08602	19.85	0.478236	3	1308.65	-0.000603853	19.1384	2
24234688	stress-70 protein, mitochondrial precursor [Homo sapiens]	482.344	30.34	1	16	16	18	1.82357e+07	679	73.6348	6.16357
	A4	Sequence	# PSMs	# Proteins	# Protein Groups	Protein Group Accessions	Modifications	ΔCn	Area	q-Value	PEP	IonScore	Exp Value	Charge	MH+ [Da]	ΔM [ppm]	RT [min]	# Missed Cleavages
	High	STNGDTFLGGEDFDQALLR	1	1	1	24234688		0	3.87884e+06	0	4.206e-16	115.49	1.51414e-10	2	2055.96	0.627961	64.915	0
	High	VINEPTAAALAYGLDK	1	1	1	24234688		0	5.12974e+06	0	4.206e-16	81.61	2.95078e-07	2	1645.88	-1.23352	58.5999	0
	High	SQVFSTAADGQTQVEIK	1	1	1	24234688		0	7.57933e+06	0	6.581e-15	79.03	6.7764e-07	2	1808.9	-0.90375	43.2218	0
	High	TTPSVVAFTADGER	1	1	1	24234688		0	2.3425e+07	0	5.87e-16	77.04	1.00924e-06	2	1450.72	0.176186	45.5953	0
	High	VQQTVQDLFGR	1	1	1	24234688		0	1.16577e+07	0	3.467e-10	62.01	3.16327e-05	2	1290.68	1.39544	49.9993	0
	High	SDIGEVILVGGMTR	1	1	1	24234688		0	7.80367e+06	0	4.206e-16	61.98	3.47678e-05	2	1446.76	-0.961813	61.6067	0
	High	QAVTNPNNTFYATK	1	1	1	24234688		0	1.2429e+07	0	5.26e-11	61.44	3.31262e-05	2	1568.77	1.58305	33.2457	0
	High	ASNGDAWVEAHGK	1	1	1	24234688		0	2.74895e+06	0	2.854e-11	57.02	6.83217e-05	2	1341.62	0.774433	24.1051	0
	High	DAGQISGLNVLR	1	1	1	24234688		0	1.80416e+07	0	2.051e-05	50.18	0.000342026	2	1242.68	-0.326875	51.563	0
	High	QAASSLQQASLK	1	1	1	24234688		0	6.88404e+06	0	0.0002504	43.86	0.00197146	2	1231.67	1.56043	26.7478	0
	High	ETAENYLGHTAK	1	1	1	24234688		0	3.51669e+06	0	0.0002504	41.67	0.00266521	2	1333.64	-1.06692	26.2261	0
	High	EQQIVIQSSGGLSK	1	1	1	24234688		0	3.43466e+06	0	5.116e-08	38.69	0.00614517	2	1473.79	-0.657339	35.5099	0
	High	NAVITVPAYFNDSQR	1	1	1	24234688		0	1.32404e+07	0	0.0002504	15.4	1.53142	2	1694.85	1.11443	57.8013	0
	High	VLENAEGAR	1	1	1	24234688		0	3.54179e+06	0.001	0.001838	34.49	0.0105445	2	958.497	1.71467	14.8643	0
	High	SDIGEVILVGGmTR	2	1	1	24234688	M12(Oxidation)	0	1.7909e+06	0.001	0.001838	14.46	1.84241	2	1462.76	1.35668	54.4687	0
	High	LVGMPAK	1	1	1	24234688		0	741482	0.005	0.04401	12.38	1.9742	1	715.417	-0.236369	26.1286	0
	Medium	LKEEISK	1	1	1	24234688		0	328612	0.027	0.2419	10.65	3.21581	2	846.494	0.648135	12.6317	1
372466577	keratin, type II cytoskeletal 8 isoform 2 [Homo sapiens]	477.046	47.62	7	19	23	51	7.88686e+07	483	53.6711	5.59229
	A4	Sequence	# PSMs	# Proteins	# Protein Groups	Protein Group Accessions	Modifications	ΔCn	Area	q-Value	PEP	IonScore	Exp Value	Charge	MH+ [Da]	ΔM [ppm]	RT [min]	# Missed Cleavages
	High	ASLEAAIADAEQR	3	2	1	372466577		0	5.10644e+07	0	5.239e-15	83.88	1.87441e-07	2	1344.68	0.000994896	52.9802	0
	High	LVSESSDVLPK	3	2	1	372466577		0	1.26333e+08	0	3.078e-10	70.74	4.00584e-06	2	1173.64	-0.246621	35.8549	0
	High	SLDMDSIIAEVK	2	2	1	372466577		0	3.66471e+07	0	2.033e-06	66.91	1.05315e-05	2	1320.67	2.35404	63.8553	0
	High	LSELEAALQR	1	2	1	372466577		0	5.24943e+07	0	0.0002504	60.22	3.89273e-05	2	1129.62	1.55017	47.1087	0
	High	YEELQSLAGK	3	2	1	372466577		0	5.77791e+07	0	0.0001267	58.2	7.03049e-05	2	1137.58	0.634683	37.9578	0
	High	SNmDNMFESYINNLR	1	2	1	372466577	M3(Oxidation)	0	0	0	5.78e-13	56.81	4.71095e-05	2	1863.8	1.97029	65.3373	0
	High	LESGMQNMSIHTK	2	2	1	372466577		0	10943606	0	1.061e-05	52.29	0.000226637	2	1475.7	1.97608	31.4896	0
	High	LALDIEIATYR	2	10	4	119395750;125628632;331999954;372466577		0	1.41478e+07	0	4.892e-06	51.83	0.000189298	2	1277.71	2.84833	63.0594	0
	High	ELQSQISDTSVVLSMDNSR	1	2	1	372466577		0	5.02942e+06	0	2.722e-14	46.33	0.00122458	2	2109.01	-2.28878	55.9333	0
	High	TEMENEFVLIK	1	2	1	372466577		0	2.38771e+07	0	1.129e-05	46.09	0.00128308	2	1352.68	-0.374251	58.8595	0
	High	SLDmDSIIAEVK	2	2	1	372466577	M4(Oxidation)	0	3.58578e+06	0	0.0004446	39.56	0.00555525	2	1336.67	1.28992	50.6892	0
	High	LEGLTDEINFLR	1	2	1	372466577		0	3.47619e+07	0	2.464e-06	38.94	0.00578227	2	1419.75	2.89447	65.3159	0
	High	ELQSQISDTSVVLSmDNSR	1	2	1	372466577	M15(Oxidation)	0	1.02158e+06	0	1.425e-06	27.6	0.0934937	2	2125.01	-0.682843	46.8862	0
	High	AQYEDIANR	3	3	1	372466577		0	4.58707e+07	0	0.0008693	21.45	0.249934	2	1079.51	0.332733	24.1095	0
	High	ASLEAAIADAEQRGELAIK	2	2	1	372466577		0	1.4438e+06	0	1.886e-09	21.43	0.257563	2	1956.04	0.540778	64.2211	1
	High	TEmENEFVLIK	2	2	1	372466577	M3(Oxidation)	0	2.9623e+06	0	0.0006009	19.12	0.53332	2	1368.67	0.0454149	56.6279	0
	High	AEAESMYQIK	3	2	1	372466577		0	2.73972e+07	0.001	0.001838	48.09	0.000502197	2	1169.55	1.63191	33.2807	0
	High	LQAEIEGLK	2	2	1	372466577		0	3.40361e+07	0.001	0.001838	23.99	0.144048	2	1000.57	0.649094	39.2784	0
	High	EYQELMNVK	2	5	3	119703753;5031839;372466577		0	1.41548e+07	0.002	0.001839	29.07	0.0471362	2	1153.56	1.16614	39.5505	0
	High	WSLLQQQK	1	2	1	372466577		0	2.72066e+07	0.002	0.001838	27.82	0.0738427	2	1030.57	-2.48797	45.9902	0
	High	FASFIDK	3	20	9	47132620;28173564;119703753;5031839;119395754;109148552;194018511;331999954;372466577		0	3.1646e+07	0.002	0.01203	23.81	0.0971151	2	827.43	0.04335	40.8821	0
	High	AEAESmYQIK	3	2	1	372466577	M6(Oxidation)	0	0	0.002	0.008682	18.77	0.358397	2	1185.55	1.26561	30.4645	0
	High	QLETLGQEK	2	2	1	372466577		0	9.70337e+06	0.006	0.05482	25.51	0.145094	2	1045.55	-1.91159	24.2192	0
	High	NKYEDEINKR	1	7	5	119395750;119703753;5031839;119395754;372466577		0	2.04089e+07	0.008	0.08602	19.85	0.478236	3	1308.65	-0.000603853	19.1384	2
	Medium	ISSSSFSR	1	2	1	372466577		0	2.34693e+07	0.017	0.1439	11.58	1.70976	2	870.433	1.57239	21.7521	0
	Medium	VGSSNFR	2	2	1	372466577		0	1.46402e+07	0.02	0.2078	25.71	0.0825743	2	766.386	1.75549	14.1067	0
	Medium	TEMENEFVLIKK	1	2	1	372466577		0	968972	0.02	0.213	20.74	0.370224	3	1480.77	-0.226826	49.6718	1
5031839	keratin, type II cytoskeletal 6A [Homo sapiens]	473.194	45.92	2	4	22	42	9.45574e+07	564	60.0083	8.00146
	A4	Sequence	# PSMs	# Proteins	# Protein Groups	Protein Group Accessions	Modifications	ΔCn	Area	q-Value	PEP	IonScore	Exp Value	Charge	MH+ [Da]	ΔM [ppm]	RT [min]	# Missed Cleavages
	High	ISIGGGScAISGGYGSR	1	3	2	119703753;5031839	C8(Carbamidomethyl)	0	6.33324e+06	0	4.311e-14	91.01	3.57418e-08	2	1598.76	1.29648	41.1457	0
	High	AIGGGLSSVGGGSSTIK	3	2	1	5031839		0	4.67613e+07	0	1.815e-14	85.13	1.36725e-07	2	1447.77	-0.918645	38.8816	0
	High	NLDLDSIIAEVK	3	7	4	47132620;119703753;5031839;119395754		0	6.73311e+07	0	2.729e-13	73.91	1.57903e-06	2	1329.73	-0.344254	67.4276	0
	High	ISIGGGSCAISGGYGSR	1	3	2	119703753;5031839		0	2.2109e+06	0	3.152e-12	70.05	4.05307e-06	2	1541.74	1.01451	46.7251	0
	High	YEELQVTAGR	2	3	1	5031839		0	4.17539e+07	0	0.0002504	68.65	6.33167e-06	2	1165.59	2.04575	33.1132	0
	High	ADTLTDEINFLR	1	3	2	119703753;5031839		0	6.76334e+07	0	1.695e-05	61.16	3.4069e-05	2	1407.71	0.153597	63.3178	0
	High	GMQDLVEDFK	1	1	1	5031839		0	5.44101e+06	0	0.0002504	51.83	0.000229651	2	1181.55	-1.501	58.4577	0
	High	AEAESWYQTK	3	4	2	119703753;5031839		0	3.12433e+07	0	0.0002504	51.03	0.00025638	2	1212.56	1.58344	32.2019	0
	High	QLDSIVGER	4	3	2	5031839;119395754		0	5.51413e+07	0	0.0002504	49.81	0.000466468	2	1016.54	-2.0959	34.0242	0
	High	AQYEEIAQR	3	6	4	47132620;119703753;5031839;331999954		0	1.33623e+08	0	0.0002504	47.33	0.000726763	2	1107.54	-0.271919	25.0302	0
	High	WTLLQEQGTK	2	4	3	119703753;5031839;119395754		0	8.24154e+07	0	0.0002504	44.57	0.00189758	2	1203.64	0.833873	46.9757	0
	High	LEGLEDALQK	1	3	2	119703753;5031839		0	3.63588e+06	0	0.0002504	43.99	0.00171182	2	1115.6	0.716274	44.4079	0
	High	DVDAAYMNK	2	7	3	119703753;5031839;119395754		0	4.48262e+06	0	0.0002504	41.74	0.00135317	2	1026.46	-0.49422	24.659	0
	High	SGFSSVSVSR	2	1	1	5031839		0	2.35879e+07	0	0.00135	33.52	0.012094	2	1012.51	1.08964	30.4341	0
	High	GSGGLGGAcGGAGFGSR	1	3	2	119703753;5031839	C9(Carbamidomethyl)	0	8.2894e+06	0	6.318e-09	33.26	0.0121084	2	1424.63	-1.14394	30.8377	0
	High	QNLEPLFEQYINNLR	1	4	3	119703753;5031839;119395754		0	1.95356e+06	0	3.676e-06	29.63	0.0607623	2	1890.97	0.436805	70.3737	0
	High	ALYDAELSQmQTHISDTSVVLSmDNNR	1	3	2	119703753;5031839	M10(Oxidation); M23(Oxidation)	0	2.42503e+06	0	7.775e-09	25.34	0.140944	3	3070.41	0.657492	53.9208	0
	High	EYQELMNVK	2	5	3	119703753;5031839;372466577		0	1.41548e+07	0.002	0.001839	29.07	0.0471362	2	1153.56	1.16614	39.5505	0
	High	FLEQQNKVLETK	1	6	3	5031839;109148552;89357932		0	0	0.002	0.001838	25.48	0.122316	2	1476.79	-7.70058	41.232	1
	High	FASFIDK	3	20	9	47132620;28173564;119703753;5031839;119395754;109148552;194018511;331999954;372466577		0	3.1646e+07	0.002	0.01203	23.81	0.0971151	2	827.43	0.04335	40.8821	0
	High	GRLDSELR	1	5	3	119703753;5031839;119395754		0	621044	0.002	0.007729	20.34	0.556668	2	945.512	0.910892	17.6177	1
	High	SLYGLGGSK	2	3	2	119703753;5031839		0	4.32471e+06	0.005	0.04422	16.35	0.645394	1	881.471	-1.55056	34.2844	0
	High	NKYEDEINKR	1	7	5	119395750;119703753;5031839;119395754;372466577		0	2.04089e+07	0.008	0.08602	19.85	0.478236	3	1308.65	-0.000603853	19.1384	2
32698730	nuclear fragile X mental retardation-interacting protein 2 [Homo sapiens]	459.534	40	1	20	20	28	3.0189e+07	695	76.0747	8.70459
	A4	Sequence	# PSMs	# Proteins	# Protein Groups	Protein Group Accessions	Modifications	ΔCn	Area	q-Value	PEP	IonScore	Exp Value	Charge	MH+ [Da]	ΔM [ppm]	RT [min]	# Missed Cleavages
	High	DYEIESQNPLASPTNTLLGSAK	1	1	1	32698730		0	2.00012e+06	0	7.049e-10	76.77	1.1392e-06	2	2348.16	-2.71714	61.6542	0
	High	ADTSSQGALVFLSK	1	1	1	32698730		0	2.3625e+07	0	2.607e-15	70.58	3.9068e-06	2	1423.75	2.17448	54.9746	0
	High	VLNGNQQVVDTSLK	1	1	1	32698730		0	2.45922e+07	0	3.213e-15	64.7	1.27236e-05	2	1514.81	-3.17775	36.547	0
	High	NLSSDEATNPISR	2	1	1	32698730		0	4.23498e+07	0	2.883e-06	60.37	3.43916e-05	2	1403.68	0.538715	30.6972	0
	High	TGYGELNGNAGER	1	1	1	32698730		0	1.06206e+07	0	1.04e-08	57.49	5.87294e-05	2	1337.61	0.447722	25.4817	0
	High	IITYNEAMDSPDQ	1	1	1	32698730		0	1.44516e+07	0	9.041e-11	53.19	0.000142721	2	1496.65	-1.72287	43.0951	0
	High	ImQQETSVPTLK	3	1	1	32698730	M2(Oxidation)	0	2.75543e+06	0	6.053e-05	53.05	0.000259368	2	1390.72	0.0523066	36.4518	0
	High	HTLQQHQETPK	1	1	1	32698730		0	3.45876e+06	0	2.515e-09	51.02	0.000417083	2	1346.68	1.2903	8.4045	0
	High	IMQQETSVPTLK	1	1	1	32698730		0	1.828e+07	0	5.702e-12	50.68	0.00041599	2	1374.73	-0.982119	38.7489	0
	High	IITYNEAmDSPDQ	1	1	1	32698730	M8(Oxidation)	0	1.34913e+06	0	2.531e-10	50	0.000236	2	1512.65	-2.29729	34.1584	0
	High	GcENLNIVQDK	1	1	1	32698730	C2(Carbamidomethyl)	0	2.1633e+07	0	2.289e-07	49.72	0.000408506	2	1289.62	0.788899	33.6472	0
	High	NDSWGSFDLR	1	1	1	32698730		0	1.01094e+07	0	0.0002504	46.27	0.000636149	2	1196.53	0.609908	55.3709	0
	High	TIQNSSVSPTSSSSSSSSTGETQTQSSSR	1	1	1	32698730		0	4.22637e+06	0	2.782e-13	33.82	0.0183617	3	2892.3	1.10254	20.4925	0
	High	GKPAVGDMLR	1	1	1	32698730		0	6.41197e+06	0	0.001838	30.11	0.0398771	2	1043.57	0.464724	30.4432	0
	High	AAIVYHTK	1	1	1	32698730		0	4.29384e+06	0	0.0004437	28.95	0.067432	2	902.51	0.73916	14.6513	0
	High	EDSWTLFKPPPVFPVDNSSAK	1	1	1	32698730		0	5.39009e+06	0	1.653e-08	28.07	0.0896743	3	2361.17	-1.60633	66.4927	0
	High	EMESIWNLQK	1	1	1	32698730		0	7.1027e+06	0	0.0002625	24.84	0.140753	2	1277.62	0.798122	55.6353	0
	High	SGTTSESGALSLEPSHIGDLQK	2	1	1	32698730		0	2.29426e+07	0	0.001824	21.92	0.356049	3	2214.09	2.50578	48.467	0
	High	QGLETFKPDYSEQK	2	1	1	32698730		0	9.47564e+06	0	0.0002504	16.49	1.10736	3	1669.81	1.8681	37.2537	0
	High	YETGPGGTSR	1	1	1	32698730		0	3.5551e+06	0.002	0.0138	19.69	0.34314	2	1024.47	-0.280624	11.7867	0
	High	TSPQVLGSILK	2	1	1	32698730		0	1.04421e+07	0.005	0.04187	10.14	2.45943	1	1142.68	1.68932	55.3133	0
	Medium	LSQVPMSALK	1	1	1	32698730		0	4.35791e+06	0.025	0.2419	18.03	0.716949	2	1073.6	0.513758	41.6794	0
41399285	60 kDa heat shock protein, mitochondrial [Homo sapiens]	438.002	42.23	1	19	19	25	1.5149e+07	573	61.0164	5.87158
	A4	Sequence	# PSMs	# Proteins	# Protein Groups	Protein Group Accessions	Modifications	ΔCn	Area	q-Value	PEP	IonScore	Exp Value	Charge	MH+ [Da]	ΔM [ppm]	RT [min]	# Missed Cleavages
	High	TLNDELEIIEGMK	1	1	1	41399285		0	1.30028e+07	0	4.206e-16	89.73	5.27283e-08	2	1504.76	0.388306	64.4696	0
	High	IQEIIEQLDVTTSEYEK	2	1	1	41399285		0	5.77796e+06	0	4.206e-16	82.55	2.91016e-07	2	2038.03	2.94541	62.2663	0
	High	VTDALNATR	2	1	1	41399285		0	1.48076e+07	0	1.866e-08	63.69	2.35373e-05	2	960.512	1.06001	20.5413	0
	High	VGLQVVAVK	1	1	1	41399285		0	5.74593e+06	0	8.119e-06	60.95	6.18715e-06	2	912.589	1.83189	41.5383	0
	High	TLNDELEIIEGmK	1	1	1	41399285	M12(Oxidation)	0	1.39524e+06	0	4.009e-12	57.13	9.06245e-05	2	1520.75	0.757983	59.2675	0
	High	VGEVIVTK	1	1	1	41399285		0	7.01763e+06	0	0.0004508	53.7	0.000163593	2	844.513	-0.492552	25.0325	0
	High	NAGVEGSLIVEK	1	1	1	41399285		0	1.76367e+07	0	1.188e-10	53.28	0.000218501	2	1215.66	0.297365	38.614	0
	High	LVQDVANNTNEEAGDGTTTATVLAR	1	1	1	41399285		0	1.13373e+06	0	4.206e-16	51.19	0.000460378	2	2560.25	-0.789639	42.8997	0
	High	GYISPYFINTSK	1	1	1	41399285		0	8.22928e+06	0	5.407e-08	47.95	0.000816052	2	1389.71	2.16739	54.9859	0
	High	cIPALDSLTPANEDQK	1	1	1	41399285	C1(Carbamidomethyl)	0	1.03428e+07	0	1.005e-14	43.53	0.00218477	2	1771.85	0.287831	52.7601	0
	High	DPGMGAMGGMGGGMGGGMF	1	1	1	41399285		0	774594	0	0.0002504	40.2	0.000339022	2	1674.62	2.10531	65.4686	0
	High	VGGTSDVEVNEK	1	1	1	41399285		0	3.49571e+06	0	1.208e-07	39.35	0.00431478	2	1233.6	1.44332	19.5233	0
	High	LSDGVAVLK	2	1	1	41399285		0	7.78004e+06	0	0.0009552	38.39	0.00574438	2	901.534	-1.32557	36.3217	0
	High	VGEVIVTKDDAMLLK	2	1	1	41399285		0	2.23795e+06	0	1.428e-08	37.2	0.00560205	2	1630.91	0.358031	52.2444	1
	High	AAVEEGIVLGGGcALLR	1	1	1	41399285	C13(Carbamidomethyl)	0	0	0	9.018e-08	22.49	0.207137	2	1684.91	2.54977	62.4539	0
	High	IMQSSSEVGYDAMAGDFVNMVEK	1	1	1	41399285		0	2.16597e+06	0	0.0002726	14.33	1.20102	3	2508.11	-0.281742	67.4641	0
	High	IPAMTIAK	2	1	1	41399285		0	3.40209e+06	0.001	0.001838	27.33	0.0726763	2	844.497	0.433702	36.315	0
	High	IGIEIIK	1	1	1	41399285		0	4.47124e+06	0.003	0.02494	27.86	0.0311814	2	785.515	2.0315	48.4843	0
	High	EIGNIISDAMK	1	1	1	41399285		0	1906263	0.005	0.04176	12.67	2.73351	2	1190.61	-0.659844	56.3389	0
	High	GANPVEIR	1	1	1	41399285		0	5.47725e+06	0.007	0.06013	29.25	0.0209771	2	855.468	-0.394121	24.9032	0
24234699	keratin, type I cytoskeletal 19 [Homo sapiens]	386.452	48.25	10	11	19	31	9.50909e+07	400	44.0791	5.13525
	A4	Sequence	# PSMs	# Proteins	# Protein Groups	Protein Group Accessions	Modifications	ΔCn	Area	q-Value	PEP	IonScore	Exp Value	Charge	MH+ [Da]	ΔM [ppm]	RT [min]	# Missed Cleavages
	High	QSSATSSFGGLGGGSVR	1	1	1	24234699		0	1.79548e+07	0	4.206e-16	105.98	1.14692e-09	2	1554.75	-0.0600416	39.0155	0
	High	VLDELTLAR	5	5	4	4557701;24430192;15431310;24234699		0	1.28645e+08	0	8.945e-05	57.05	8.42225e-05	2	1029.6	2.7059	48.0403	0
	High	MSVEADINGLR	1	2	2	15431310;24234699		0	1.28225e+07	0	0.0002504	56.6	9.39644e-05	2	1204.6	1.15405	48.1736	0
	High	LEQEIATYR	2	9	4	4557701;24430192;15431310;24234699		0	4.85874e+07	0	0.0002582	55.89	0.00012186	2	1122.58	0.784161	31.6171	0
	High	GQVGGQVSVEVDSAPGTDLAK	1	1	1	24234699		0	3.28365e+06	0	4.206e-16	55.28	0.000163807	2	2014.01	0.538227	44.4188	0
	High	ALEAANGELEVK	1	1	1	24234699		0	1.41511e+07	0	0.0002504	47.31	0.00072733	2	1243.65	-1.12125	36.6351	0
	High	SQYEVMAEQNR	1	1	1	24234699		0	7.31677e+06	0	0.0002504	47.31	0.000532261	2	1354.61	1.43971	28.7722	0
	High	SLLEGQEDHYNNLSASK	2	1	1	24234699		0	7.08337e+06	0	7.858e-06	29.45	0.0506782	2	1904.9	-0.98024	37.8744	0
	High	mSVEADINGLR	1	2	2	15431310;24234699	M1(Oxidation)	0	9.09564e+06	0	0.0002504	27.39	0.0804338	2	1220.59	-1.99573	42.4689	0
	High	DYSHYYTTIQDLR	1	1	1	24234699		0	792205	0	0.0002504	19.63	0.393648	2	1674.77	-1.47977	52.6483	0
	High	LTMQNLNDR	1	4	1	24234699		0	6.62911e+06	0.001	0.001838	46.21	0.000999209	2	1104.55	0.780093	32.3167	0
	High	IVLQIDNAR	1	2	2	40354195;24234699		0	4.43266e+07	0.001	0.001838	42.55	0.00102008	2	1041.61	0.331266	40.873	0
	High	FGPGVAFR	2	1	1	24234699		0	7.01808e+06	0.001	0.001838	26.67	0.0827745	2	850.458	0.893602	43.7411	0
	High	DAEAWFTSR	1	1	1	24234699		0	6.88593e+06	0.002	0.001838	33.98	0.0114984	2	1082.49	1.65328	49.3504	0
	High	LAADDFR	3	18	6	4557701;40354195;195972866;24430192;15431310;24234699		0	7.44262e+06	0.002	0.001838	32.31	0.0238227	2	807.399	-0.765322	31.0649	0
	High	APSIHGGSGGR	1	1	1	24234699		0	2.94709e+06	0.002	0.004923	20	0.3555	2	995.502	0.475704	8.93428	0
	High	LASYLDK	3	8	6	55956899;4557701;24430192;195972866;15431310;24234699		0	1.0804e+08	0.003	0.03207	33.1	0.0136648	2	809.441	1.3374	27.5555	0
	High	LASYLDKVR	1	7	5	4557701;24430192;195972866;15431310;24234699		0	2.57006e+06	0.004	0.03712	36.47	0.00471136	2	1064.61	0.687577	30.1952	1
	High	TKFETEQALR	1	2	2	4557701;24234699		0	1.04471e+06	0.009	0.1046	15.96	1.14968	3	1222.64	1.06676	26.6446	1
	Medium	SQYEVMAEQNRK	1	1	1	24234699		0	532249	0.02	0.1948	20.47	0.34551	2	1482.7	0.739498	23.4154	1
33286418	pyruvate kinase isozymes M1/M2 isoform a [Homo sapiens]	333.403	39.17	6	14	14	16	8.66436e+06	531	57.9	7.84033
	A4	Sequence	# PSMs	# Proteins	# Protein Groups	Protein Group Accessions	Modifications	ΔCn	Area	q-Value	PEP	IonScore	Exp Value	Charge	MH+ [Da]	ΔM [ppm]	RT [min]	# Missed Cleavages
	High	LAPITSDPTEATAVGAVEASFK	2	3	1	33286418		0	4.05217e+06	0	4.206e-16	86.15	1.2036e-07	2	2175.12	0.0645304	64.4242	0
	High	GADFLVTEVENGGSLGSK	1	6	1	33286418		0	6.35654e+06	0	8.331e-12	63.72	2.22925e-05	2	1779.87	-1.10135	60.4444	0
	High	FDEILEASDGIMVAR	1	6	1	33286418		0	475812	0	4.206e-16	57.25	0.000103977	2	1665.82	0.442028	61.9125	0
	High	GVNLPGAAVDLPAVSEK	1	6	1	33286418		0	5.11798e+06	0	3.471e-11	49.16	0.000419833	2	1636.89	-0.230304	58.2161	0
	High	DPVQEAWAEDVDLR	1	6	1	33286418		0	1.28125e+06	0	4.718e-12	48.05	0.000638451	2	1642.77	0.649442	59.3173	0
	High	NTGIIcTIGPASR	2	5	1	33286418	C6(Carbamidomethyl)	0	1.35897e+07	0	0.0002504	47.51	0.000950078	2	1359.7	-1.41558	42.6006	0
	High	IYVDDGLISLQVK	1	6	1	33286418		0	3.37804e+06	0	5.264e-14	44.39	0.00100077	2	1462.82	1.50334	62.4686	0
	High	AEGSDVANAVLDGADcIMLSGETAK	1	6	1	33286418	C16(Carbamidomethyl)	0	6.04682e+06	0	5.426e-08	42.83	0.00228544	3	2494.14	-2.16727	68.0794	0
	High	TATESFASDPILYRPVAVALDTK	1	5	1	33286418		0	3.05073e+06	0	0.0002504	28.51	0.0512276	3	2465.3	2.1252	65.0332	0
	High	ITLDNAYMEK	1	6	1	33286418		0	4.60875e+06	0	0.0002504	25.23	0.118467	2	1197.58	-0.078927	42.0976	0
	High	LDIDSPPITAR	1	5	1	33286418		0	0	0	0.0003712	19.85	0.33021	2	1197.65	1.58501	44.2731	0
	High	GDYPLEAVR	1	6	1	33286418		0	3.60642e+06	0.001	0.001838	21.19	0.351651	2	1019.52	1.12893	39.4245	0
	High	APIIAVTR	1	6	1	33286418		0	0	0.002	0.003943	27.47	0.0135191	1	840.531	0.727474	33.7969	0
	High	GSGTAEVELK	1	5	1	33286418		0	309917	0.002	0.001838	19.09	0.676975	2	990.51	-0.462465	23.3025	0
119395754	keratin, type II cytoskeletal 5 [Homo sapiens]	332.117	35.59	2	14	22	36	6.82959e+07	590	62.34	7.73779
	A4	Sequence	# PSMs	# Proteins	# Protein Groups	Protein Group Accessions	Modifications	ΔCn	Area	q-Value	PEP	IonScore	Exp Value	Charge	MH+ [Da]	ΔM [ppm]	RT [min]	# Missed Cleavages
	High	NLDLDSIIAEVK	3	7	4	47132620;119703753;5031839;119395754		0	6.73311e+07	0	2.729e-13	73.91	1.57903e-06	2	1329.73	-0.344254	67.4276	0
	High	YEELQQTAGR	1	1	1	119395754		0	4.92919e+07	0	7.41e-08	68.17	6.59153e-06	2	1194.58	1.0365	22.2893	0
	High	VSLAGAcGVGGYGSR	1	1	1	119395754	C7(Carbamidomethyl)	0	7.10597e+06	0	4.206e-16	60.65	3.82281e-05	2	1410.68	0.169988	37.7607	0
	High	ISISTSGGSFR	2	1	1	119395754		0	5.26646e+07	0	2.847e-05	60.14	3.4858e-05	2	1111.57	0.333994	38.6185	0
	High	QLDSIVGER	4	3	2	5031839;119395754		0	5.51413e+07	0	0.0002504	49.81	0.000466468	2	1016.54	-2.0959	34.0242	0
	High	TEAESWYQTK	1	1	1	119395754		0	2.99906e+07	0	0.0002504	46.22	0.000563523	2	1242.56	-0.764195	32.5806	0
	High	VDALmDEINFmK	1	1	1	119395754	M5(Oxidation); M11(Oxidation)	0	6.1904e+06	0	7.892e-06	46.15	0.000778942	2	1457.67	1.11435	50.0064	0
	High	WTLLQEQGTK	2	4	3	119703753;5031839;119395754		0	8.24154e+07	0	0.0002504	44.57	0.00189758	2	1203.64	0.833873	46.9757	0
	High	DVDAAYMNK	2	7	3	119703753;5031839;119395754		0	4.48262e+06	0	0.0002504	41.74	0.00135317	2	1026.46	-0.49422	24.659	0
	High	LAELEEALQK	1	1	1	119395754		0	1.36589e+07	0	1.158e-06	40.71	0.0038298	2	1143.63	0.868476	45.3536	0
	High	AQYEEIANR	2	1	1	119395754		0	2.91963e+07	0	0.0002504	31.24	0.0262692	2	1093.53	-0.475803	24.4292	0
	High	VDALmDEINFMK	2	1	1	119395754	M5(Oxidation)	0	3.19358e+06	0	5.848e-10	30.95	0.0278824	2	1441.67	0.901792	60.1801	0
	High	NMQDLVEDFK	1	1	1	119395754		0	6.25122e+06	0	0.0002504	30.21	0.0332049	2	1238.57	-0.5252	58.8736	0
	High	QNLEPLFEQYINNLR	1	4	3	119703753;5031839;119395754		0	1.95356e+06	0	3.676e-06	29.63	0.0607623	2	1890.97	0.436805	70.3737	0
	High	TTAENEFVMLK	1	1	1	119395754		0	1.35218e+07	0.002	0.001838	42.24	0.00225679	2	1282.63	-2.10787	51.1443	0
	High	SLYNLGGSK	2	1	1	119395754		0	1.41427e+07	0.002	0.001838	38.36	0.00416491	2	938.494	-0.274074	33.7825	0
	High	TSFTSVSR	1	1	1	119395754		0	9.17972e+06	0.002	0.01642	31.79	0.0168865	2	884.447	-0.275033	23.013	0
	High	FASFIDK	3	20	9	47132620;28173564;119703753;5031839;119395754;109148552;194018511;331999954;372466577		0	3.1646e+07	0.002	0.01203	23.81	0.0971151	2	827.43	0.04335	40.8821	0
	High	GRLDSELR	1	5	3	119703753;5031839;119395754		0	621044	0.002	0.007729	20.34	0.556668	2	945.512	0.910892	17.6177	1
	High	DVDAAYMNKVELEAK	1	2	1	119395754		0	617872	0.002	0.002982	10.83	3.82043	2	1695.83	1.84322	45.5273	1
	High	TTAENEFVMLKK	1	1	1	119395754		0	1.41358e+06	0.004	0.0351	25.72	0.117615	2	1410.73	0.593394	42.2379	1
	High	HEISEMNR	1	1	1	119395754		0	6.63995e+06	0.005	0.0426	10.72	1.6182	2	1015.46	-2.79371	13.4211	0
	High	NKYEDEINKR	1	7	5	119395750;119703753;5031839;119395754;372466577		0	2.04089e+07	0.008	0.08602	19.85	0.478236	3	1308.65	-0.000603853	19.1384	2
21735621	malate dehydrogenase, mitochondrial precursor [Homo sapiens]	322.547	44.67	1	13	13	32	3.9833e+07	338	35.4807	8.67529
	A4	Sequence	# PSMs	# Proteins	# Protein Groups	Protein Group Accessions	Modifications	ΔCn	Area	q-Value	PEP	IonScore	Exp Value	Charge	MH+ [Da]	ΔM [ppm]	RT [min]	# Missed Cleavages
	High	VDFPQDQLTALTGR	2	1	1	21735621		0	3.68531e+07	0	2.079e-08	80.86	3.7244e-07	2	1560.8	-0.728211	60.036	0
	High	SQETEcTYFSTPLLLGK	1	1	1	21735621	C6(Carbamidomethyl)	0	2.43864e+07	0	7.981e-10	63.26	2.36976e-05	2	1973.95	1.18862	63.8789	0
	High	GYLGPEQLPDcLK	2	1	1	21735621	C11(Carbamidomethyl)	0	3.56105e+07	0	8.333e-12	54.3	0.000177408	2	1489.74	2.07403	55.1046	0
	High	AGAGSATLSmAYAGAR	5	1	1	21735621	M10(Oxidation)	0	2.29851e+06	0	5.93e-05	51.62	0.000270985	2	1470.7	1.72455	33.26	0
	High	AGAGSATLSMAYAGAR	2	1	1	21735621		0	1.8916e+07	0	1.255e-14	48.73	0.000582759	2	1454.71	1.60452	41.4162	0
	High	TIIPLISQcTPK	1	1	1	21735621	C9(Carbamidomethyl)	0	2.1329e+07	0	4.856e-06	48.51	0.00038685	2	1370.77	2.60624	57.1327	0
	High	MISDAIPELK	4	1	1	21735621		0	1.27882e+07	0	0.0002505	37.58	0.0080657	2	1116.6	0.528819	60.9882	0
	High	VNVPVIGGHAGK	3	1	1	21735621		0	1.18542e+07	0	0.0008325	36.71	0.00465004	2	1147.66	0.824275	34.9247	0
	High	mISDAIPELK	4	1	1	21735621	M1(Oxidation)	0	2.36412e+06	0	0.0002576	36.24	0.0119555	2	1132.59	1.02321	47.6457	0
	High	ANTFVAELK	2	1	1	21735621		0	1.51481e+07	0	0.00033	36.23	0.0103631	2	992.539	-2.56865	42.9999	0
	High	GcDVVVIPAGVPR	1	1	1	21735621	C2(Carbamidomethyl)	0	4.70352e+07	0	1.251e-10	35.13	0.0114321	2	1338.72	-2.29386	51.2237	0
	High	EGVVEcSFVK	1	1	1	21735621	C6(Carbamidomethyl)	0	2.08344e+07	0	0.0002504	31.9	0.0264395	2	1153.56	0.0957924	38.4855	0
	High	IQEAGTEVVK	1	1	1	21735621		0	2.91479e+07	0.002	0.002126	31.44	0.0341311	2	1073.58	0.697621	21.8525	0
	High	HGVYNPNK	2	1	1	21735621		0	806683	0.005	0.04388	17.17	0.415392	2	928.463	-0.276656	8.85071	0
	Medium	KGEDFVK	1	1	1	21735621		0	853747	0.012	0.1214	27.26	0.0637088	2	822.436	0.0914893	13.9146	1
4557701	keratin, type I cytoskeletal 17 [Homo sapiens]	298.909	29.86	10	4	14	28	1.09063e+08	432	48.076	5.021
	A4	Sequence	# PSMs	# Proteins	# Protein Groups	Protein Group Accessions	Modifications	ΔCn	Area	q-Value	PEP	IonScore	Exp Value	Charge	MH+ [Da]	ΔM [ppm]	RT [min]	# Missed Cleavages
	High	EVATNSELVQSGK	3	2	2	4557701;15431310		0	9.05023e+07	0	2.633e-06	64.56	1.76372e-05	2	1361.69	0.239656	24.4269	0
	High	VLDELTLAR	5	5	4	4557701;24430192;15431310;24234699		0	1.28645e+08	0	8.945e-05	57.05	8.42225e-05	2	1029.6	2.7059	48.0403	0
	High	LEQEIATYR	2	9	4	4557701;24430192;15431310;24234699		0	4.85874e+07	0	0.0002582	55.89	0.00012186	2	1122.58	0.784161	31.6171	0
	High	GQVGGEINVEmDAAPGVDLSR	2	1	1	4557701	M11(Oxidation)	0	4.08765e+06	0	2.226e-10	53.18	0.000257009	2	2130.01	0.537835	49.2044	0
	High	LSVEADINGLR	2	1	1	4557701		0	3.19234e+06	0	3.671e-09	50.01	0.000441981	2	1186.65	2.92797	50.2733	0
	High	GQVGGEINVEMDAAPGVDLSR	1	1	1	4557701		0	636641	0	4.133e-09	40.22	0.00480055	2	2114.02	-0.708603	56.669	0
	High	DAEDWFFSK	1	1	1	4557701		0	3.19725e+06	0	0.0002504	33.41	0.00950837	2	1144.49	-0.485058	61.2361	0
	High	NHEEEMNALR	1	2	2	4557701;15431310		0	9.68796e+06	0	0.0002504	23.7	0.0934209	2	1242.55	0.923572	22.4109	0
	High	LAADDFR	3	18	6	4557701;40354195;195972866;24430192;15431310;24234699		0	7.44262e+06	0.002	0.001838	32.31	0.0238227	2	807.399	-0.765322	31.0649	0
	High	SEISELR	1	2	2	4557701;15431310		0	0	0.002	0.001838	18.44	0.628014	2	833.437	0.691051	27.0351	0
	High	LASYLDK	3	8	6	55956899;4557701;24430192;195972866;15431310;24234699		0	1.0804e+08	0.003	0.03207	33.1	0.0136648	2	809.441	1.3374	27.5555	0
	High	LASYLDKVR	1	7	5	4557701;24430192;195972866;15431310;24234699		0	2.57006e+06	0.004	0.03712	36.47	0.00471136	2	1064.61	0.687577	30.1952	1
	High	TKFETEQALR	1	2	2	4557701;24234699		0	1.04471e+06	0.009	0.1046	15.96	1.14968	3	1222.64	1.06676	26.6446	1
	Medium	DYSQYYR	1	1	1	4557701		0	2.12026e+06	0.021	0.2325	22.94	0.0741913	1	994.427	0.953221	30.5639	0
	Medium	IRDWYQR	1	3	3	4557701;24430192;15431310		0	1.66105e+07	0.049	0.5132	26.89	0.089532	2	1036.53	1.60327	29.1204	1
5729877	heat shock cognate 71 kDa protein isoform 1 [Homo sapiens]	296.231	29.41	3	11	16	26	3.30838e+07	646	70.8542	5.51611
	A4	Sequence	# PSMs	# Proteins	# Protein Groups	Protein Group Accessions	Modifications	ΔCn	Area	q-Value	PEP	IonScore	Exp Value	Charge	MH+ [Da]	ΔM [ppm]	RT [min]	# Missed Cleavages
	High	IINEPTAAAIAYGLDK	1	5	2	5729877;16507237		0	1.42206e+07	0	2.112e-14	100.16	3.67701e-09	2	1659.9	0.600359	59.5201	0
	High	DAGTIAGLNVLR	1	2	1	5729877		0	2.30316e+07	0	1.182e-08	82.98	1.58603e-07	2	1199.67	-0.0744913	56.4636	0
	High	NQVAMNPTNTVFDAK	1	2	1	5729877		0	2.26112e+07	0	2.844e-13	68.16	7.51563e-06	2	1649.79	-1.21276	46.1812	0
	High	TTPSYVAFTDTER	1	6	2	5729877;167466173		0	5.31662e+07	0	7.684e-12	61.33	2.43685e-05	2	1487.7	1.41523	44.5289	0
	High	RFDDAVVQSDMK	1	2	1	5729877		0	5.19366e+06	0	4.917e-07	47.23	0.00077113	2	1410.67	-0.6134	33.8385	1
	High	NQVAmNPTNTVFDAK	7	2	1	5729877	M5(Oxidation)	0	2.02834e+06	0	3.298e-05	41.43	0.00364401	2	1665.79	-1.73927	43.2534	0
	High	VEIIANDQGNR	1	7	3	167466173;5729877;16507237		0	2.30538e+07	0	0.0002504	37.87	0.00700579	2	1228.63	-0.995133	26.1737	0
	High	STAGDTHLGGEDFDNR	1	3	1	5729877		0	5.75019e+06	0	0.0002504	35.18	0.00658354	2	1691.73	0.488689	29.4026	0
	High	QTQTFTTYSDNQPGVLIQVYEGER	1	2	1	5729877		0	5.64437e+06	0	9.119e-06	17.51	1.01306	3	2774.33	-0.522192	62.5484	0
	High	TVTNAVVTVPAYFNDSQR	2	2	1	5729877		0	6.52909e+06	0	0.00106	11.21	4.00365	3	1982	0.91657	57.569	0
	High	FEELNADLFR	1	3	1	5729877		0	1.5409e+07	0.001	0.001838	39.37	0.005532	2	1253.62	0.385642	60.1757	0
	High	VQVEYKGETK	1	3	1	5729877		0	1.7917e+06	0.002	0.001838	36.2	0.0107348	2	1180.62	0.538919	17.6102	1
	High	EIAEAYLGK	2	2	1	5729877		0	3.89689e+06	0.002	0.01007	29.42	0.0478866	2	993.525	0.320031	36.2362	0
	High	VcNPIITK	1	1	1	5729877	C2(Carbamidomethyl)	0	9.01082e+06	0.002	0.0113	28.56	0.0735587	2	944.524	1.11841	28.8266	0
	High	LIGDAAK	1	6	3	5729877;167466173;16507237		0	2.39196e+06	0.002	0.01622	10.64	4.02579	1	687.405	1.5301	14.1137	0
	Medium	ARFEELNADLFR	1	3	1	5729877		0	354805	0.017	0.1496	19.31	0.555035	3	1480.75	0.0732186	57.7359	1
	Medium	ITITNDK	1	5	2	5729877;167466173		0	535074	0.017	0.1509	11.7	3.42774	1	804.447	1.56311	17.6266	0
	Medium	RFDDAVVQSDmK	1	2	1	5729877	M11(Oxidation)	0	351853	0.023	0.2419	14.71	1.20858	2	1426.66	-0.208111	25.4122	1
40354195	keratin, type I cytoskeletal 18 [Homo sapiens]	286.534	45.35	8	15	17	24	3.20482e+07	430	48.0285	5.45264
	A4	Sequence	# PSMs	# Proteins	# Protein Groups	Protein Group Accessions	Modifications	ΔCn	Area	q-Value	PEP	IonScore	Exp Value	Charge	MH+ [Da]	ΔM [ppm]	RT [min]	# Missed Cleavages
	High	GLQAQIASSGLTVEVDAPK	1	1	1	40354195		0	1.54616e+06	0	4.206e-16	76.04	1.03412e-06	2	1884.01	-0.199412	57.2849	0
	High	LLEDGEDFNLGDALDSSNSMQTIQK	1	1	1	40354195		0	1.27058e+07	0	4.206e-16	74.23	2.02001e-06	3	2740.27	1.60541	63.4504	0
	High	TVQSLEIDLDSMR	1	1	1	40354195		0	1.69326e+07	0	4.318e-10	60.03	5.21386e-05	2	1506.75	0.21814	61.0834	0
	High	VIDDTNITR	1	1	1	40354195		0	2.61952e+07	0	0.0002504	53.88	0.000208723	2	1046.55	0.179506	25.3689	0
	High	YETELAMR	2	1	1	40354195		0	5.38629e+06	0	0.0002504	46.18	0.000590427	2	1012.48	1.87167	33.2764	0
	High	TVQSLEIDLDSmR	1	1	1	40354195	M12(Oxidation)	0	1.31279e+06	0	0.0002504	43.69	0.00198175	2	1522.74	-1.89599	51.0809	0
	High	QAQEYEALLNIK	1	1	1	40354195		0	2.56228e+07	0	3.316e-09	40.91	0.00370609	2	1419.75	0.501113	58.0724	0
	High	QSVENDIHGLR	1	1	1	40354195		0	8.38777e+06	0	0.0002504	32.87	0.0211214	2	1267.64	-0.40703	32.0161	0
	High	AQIFANTVDNAR	2	1	1	40354195		0	2.48228e+07	0	6.331e-06	30.44	0.0491133	2	1319.67	0.303557	37.1248	0
	High	GGMGSGGLATGIAGGLAGMGGIQNEK	1	1	1	40354195		0	2.36171e+06	0	5.974e-08	25.32	0.17009	3	2261.11	3.57786	62.2981	0
	High	IVLQIDNAR	1	2	2	40354195;24234699		0	4.43266e+07	0.001	0.001838	42.55	0.00102008	2	1041.61	0.331266	40.873	0
	High	LASYLDR	3	1	1	40354195		0	5.24425e+06	0.002	0.001838	36	0.00847762	2	837.448	1.45582	29.8834	0
	High	LAADDFR	3	18	6	4557701;40354195;195972866;24430192;15431310;24234699		0	7.44262e+06	0.002	0.001838	32.31	0.0238227	2	807.399	-0.765322	31.0649	0
	High	VKLEAEIATYR	1	1	1	40354195		0	2.4372e+06	0.002	0.01255	28.37	0.0463564	2	1292.72	-1.08398	42.0783	1
	High	ETMQSLNDR	1	2	1	40354195		0	1.79398e+06	0.002	0.001997	22.21	0.135865	2	1093.5	1.79435	21.2703	0
	High	VKYETELAMR	1	1	1	40354195		0	9473557	0.002	0.001838	12.1	2.63286	2	1239.64	-2.21236	34.1464	1
	High	STFSTNYR	1	1	1	40354195		0	1.35179e+07	0.006	0.051	15.36	0.743688	2	975.455	1.81377	25.5961	0
	Medium	DWSHYFK	1	1	1	40354195		0	1.83865e+06	0.018	0.1619	10.2	2.49253	2	982.442	-0.188694	46.9101	0
16507237	78 kDa glucose-regulated protein precursor [Homo sapiens]	281.156	31.5	1	14	17	18	1.49048e+07	654	72.2884	5.16064
	A4	Sequence	# PSMs	# Proteins	# Protein Groups	Protein Group Accessions	Modifications	ΔCn	Area	q-Value	PEP	IonScore	Exp Value	Charge	MH+ [Da]	ΔM [ppm]	RT [min]	# Missed Cleavages
	High	IINEPTAAAIAYGLDK	1	5	2	5729877;16507237		0	1.42206e+07	0	2.112e-14	100.16	3.67701e-09	2	1659.9	0.600359	59.5201	0
	High	IEIESFYEGEDFSETLTR	1	1	1	16507237		0	705488	0	4.206e-16	78.4	6.30212e-07	2	2164.99	0.367771	64.9366	0
	High	TFAPEEISAMVLTK	1	1	1	16507237		0	1.3272e+06	0	1.448e-07	71.66	3.17629e-06	2	1536.8	1.19659	65.7192	0
	High	SQIFSTASDNQPTVTIK	1	1	1	16507237		0	7.29879e+06	0	1.107e-08	59.72	5.94627e-05	2	1836.94	0.683145	46.7457	0
	High	ITPSYVAFTPEGER	1	1	1	16507237		0	6.81026e+06	0	1.72e-08	40.61	0.00402329	2	1566.78	1.89765	50.4046	0
	High	TWNDPSVQQDIK	1	1	1	16507237		0	7.43991e+06	0	6.006e-08	40.17	0.0039378	2	1430.69	-0.514496	38.8839	0
	High	VEIIANDQGNR	1	7	3	167466173;5729877;16507237		0	2.30538e+07	0	0.0002504	37.87	0.00700579	2	1228.63	-0.995133	26.1737	0
	High	TKPYIQVDIGGGQTK	1	1	1	16507237		0	766566	0	0.0002504	33.5	0.0182247	2	1604.86	0.376644	40.1701	0
	High	SDIDEIVLVGGSTR	2	1	1	16507237		0	3.55673e+06	0	0.0002504	23.08	0.260535	2	1460.76	-0.326343	55.8587	0
	High	ELEEIVQPIISK	1	1	1	16507237		0	4.89569e+06	0	0.0002504	22.92	0.107206	2	1397.79	2.48288	56.8954	0
	High	ITITNDQNR	1	1	1	16507237		0	3.75057e+06	0	0.0002504	18.74	0.669634	2	1074.55	0.708878	19.6595	0
	High	LYGSAGPPPTGEEDTAEK	1	1	1	16507237		0	1.52688e+06	0	7.635e-06	16.88	0.9261	2	1818.84	0.324409	29.5257	0
	High	NQLTSNPENTVFDAK	1	1	1	16507237		0	518402	0.001	0.001838	12.14	3.01194	2	1677.81	-0.589422	43.2918	0
	High	KSDIDEIVLVGGSTR	1	1	1	16507237		0	453607	0.002	0.001838	26.21	0.109853	2	1588.86	0.622359	49.5083	1
	High	LIGDAAK	1	6	3	5729877;167466173;16507237		0	2.39196e+06	0.002	0.01622	10.64	4.02579	1	687.405	1.5301	14.1137	0
	High	LYGSAGPPPTGEEDTAEKDEL	1	1	1	16507237		0	0	0.002	0.001838	10.33	4.04561	2	2175.99	-0.539746	42.8208	1
	High	VYEGERPLTK	1	1	1	16507237		0	1.63858e+06	0.004	0.03636	16.59	0.979087	2	1191.64	1.76422	20.1065	0
27436946	lamin isoform A [Homo sapiens]	274.304	23.04	4	12	12	13	9.35966e+06	664	74.0947	7.02002
	A4	Sequence	# PSMs	# Proteins	# Protein Groups	Protein Group Accessions	Modifications	ΔCn	Area	q-Value	PEP	IonScore	Exp Value	Charge	MH+ [Da]	ΔM [ppm]	RT [min]	# Missed Cleavages
	High	TALINSTGEEVAMR	1	3	1	27436946		0	6.58812e+06	0	5.023e-08	68.76	6.67223e-06	2	1491.75	-0.825892	42.8741	0
	High	SVGGSGGGSFGDNLVTR	2	3	1	27436946		0	1.23964e+07	0	3.269e-11	60.06	4.45798e-05	2	1566.75	0.868991	40.7966	0
	High	SNEDQSMGNWQIK	1	4	1	27436946		0	2.58584e+06	0	7.898e-08	54.46	9.13146e-05	2	1536.67	-1.39671	42.7492	0
	High	SGAQASSTPLSPTR	1	3	1	27436946		0	6.26422e+06	0	1.14e-06	49.41	0.000558438	2	1359.69	0.528076	22.7055	0
	High	LADALQELR	1	4	1	27436946		0	3.09021e+06	0	0.0002504	49.33	0.000343625	2	1028.57	1.41698	45.4837	0
	High	AAYEAELGDAR	1	3	1	27436946		0	1.58658e+06	0	0.0002504	47.77	0.000682641	2	1165.55	2.45878	31.499	0
	High	IDSLSAQLSQLQK	1	4	1	27436946		0	1.35785e+06	0	8.82e-08	47.29	0.000755884	2	1430.79	1.25767	53.3993	0
	High	AQNTWGcGNSLR	1	4	1	27436946	C7(Carbamidomethyl)	0	4.27084e+06	0	0.0002504	46.83	0.000612099	2	1363.62	1.26779	31.3548	0
	High	TVLcGTcGQPADK	1	3	1	27436946	C4(Carbamidomethyl); C7(Carbamidomethyl)	0	9.09441e+06	0	0.0006125	42.38	0.00165046	2	1406.64	0.417619	21.9567	0
	High	SLETENAGLR	1	3	1	27436946		0	2.78556e+06	0	0.0002504	37.66	0.00753284	2	1089.55	0.656707	26.7457	0
	High	NSNLVGAAHEELQQSR	1	4	1	27436946		0	2.52166e+06	0	5.199e-14	34.92	0.0167818	2	1752.86	0.726674	38.0098	0
	High	EAALSTALSEK	1	4	1	27436946		0	2.47328e+06	0.001	0.001838	20.12	0.460109	2	1119.59	-0.191538	35.6168	0
52632383	heterogeneous nuclear ribonucleoprotein L isoform a [Homo sapiens]	263.002	29.88	4	12	12	15	2.05251e+07	589	64.0924	8.22119
	A4	Sequence	# PSMs	# Proteins	# Protein Groups	Protein Group Accessions	Modifications	ΔCn	Area	q-Value	PEP	IonScore	Exp Value	Charge	MH+ [Da]	ΔM [ppm]	RT [min]	# Missed Cleavages
	High	NGVQAMVEFDSVQSAQR	1	2	1	52632383		0	5.33653e+06	0	7.939e-15	84.72	1.6038e-07	2	1865.88	1.1228	53.1183	0
	High	SKPGAAMVEMADGYAVDR	2	2	1	52632383		0	1.21673e+07	0	4.206e-16	74.49	1.59856e-06	2	1867.87	1.19463	49.7469	0
	High	ASLNGADIYSGccTLK	1	2	1	52632383	C12(Carbamidomethyl); C13(Carbamidomethyl)	0	1.6797e+07	0	9.047e-09	65.95	1.01258e-05	2	1729.79	1.36998	44.2638	0
	High	VFNVFcLYGNVEK	1	2	1	52632383	C6(Carbamidomethyl)	0	2.38389e+06	0	2.309e-10	61.77	3.38957e-05	2	1588.78	-0.154161	67.2986	0
	High	TPASPVVHIR	1	1	1	52632383		0	7.73621e+06	0	0.0002504	38.82	0.00305086	2	1076.62	1.35135	28.7653	0
	High	QPAIMPGQSYGLEDGScSYK	1	2	1	52632383	C17(Carbamidomethyl)	0	2.35678e+06	0	2.47e-08	38.06	0.00568204	2	2187.97	-0.474598	48.1968	0
	High	SSSGLLEWESK	2	2	1	52632383		0	2.56397e+07	0	3.495e-05	31.43	0.0347854	2	1222.6	1.76204	49.3364	0
	High	TDNAGDQHGGGGGGGGGAGAAGGGGGGENYDDPHK	1	1	1	52632383		0	338482	0	3.576e-08	25.08	0.0468788	3	2981.21	1.05105	15.0529	0
	High	LNVcVSK	1	4	1	52632383	C4(Carbamidomethyl)	0	1.8323e+06	0.002	0.003941	22.5	0.24265	1	819.439	-0.00516855	24.0085	0
	High	FSTPEQAAK	1	2	1	52632383		0	1.63914e+07	0.002	0.001861	17.52	0.746986	2	978.489	0.36507	20.9411	0
	High	YYGGGSEGGR	1	1	1	52632383		0	1.79974e+06	0.002	0.001838	11.89	0.867171	2	1002.43	0.687286	12.2109	0
	High	LcFSTAQHAS	2	2	1	52632383	C2(Carbamidomethyl)	0	1.91387e+07	0.003	0.01973	27.23	0.050904	2	1121.51	1.07671	30.4319	0
4502027	serum albumin preproprotein [Homo sapiens]	243.185	9.52	1	7	7	17	1.64184e+08	609	69.3215	6.27783
	A4	Sequence	# PSMs	# Proteins	# Protein Groups	Protein Group Accessions	Modifications	ΔCn	Area	q-Value	PEP	IonScore	Exp Value	Charge	MH+ [Da]	ΔM [ppm]	RT [min]	# Missed Cleavages
	High	KVPQVSTPTLVEVSR	4	1	1	4502027		0	189642969	0	2.612e-08	93.34	6.39557e-09	2	1639.94	1.17295	45.3307	1
	High	VPQVSTPTLVEVSR	2	1	1	4502027		0	1.5975e+08	0	2.346e-10	53.93	0.000110652	2	1511.84	0.625924	49.5998	0
	High	ccTESLVNR	1	1	1	4502027	C1(Carbamidomethyl); C2(Carbamidomethyl)	0	5.7625e+07	0	4.917e-05	44.67	0.000653384	2	1138.5	1.47746	22.896	0
	High	LVTDLTK	3	1	1	4502027		0	6.52878e+07	0.002	0.003584	26.93	0.0579917	1	789.473	1.77613	26.8321	0
	High	YLYEIAR	3	1	1	4502027		0	6.8675e+07	0.002	0.001838	19.81	0.304014	2	927.494	1.04698	45.3656	0
	High	FQNALLVR	1	1	1	4502027		0	0	0.003	0.02754	11.94	1.87442	2	960.562	-0.850709	43.5566	0
	High	YIcENQDSISSK	3	1	1	4502027	C3(Carbamidomethyl)	0	143159587	0.006	0.04904	11.41	2.31648	2	1443.64	1.73419	33.3023	0
4503929	trans-acting T-cell-specific transcription factor GATA-3 isoform 2 [Homo sapiens]	240.733	25.06	6	8	8	11	2.74981e+07	443	47.8853	9.42236
	A4	Sequence	# PSMs	# Proteins	# Protein Groups	Protein Group Accessions	Modifications	ΔCn	Area	q-Value	PEP	IonScore	Exp Value	Charge	MH+ [Da]	ΔM [ppm]	RT [min]	# Missed Cleavages
	High	AGTScANcQTTTTTLWR	2	2	1	4503929	C5(Carbamidomethyl); C8(Carbamidomethyl)	0	1.9157e+07	0	4.206e-16	70.81	3.06215e-06	2	1928.86	0.0347811	40.8772	0
	High	EcVNcGATSTPLWR	2	2	1	4503929	C2(Carbamidomethyl); C5(Carbamidomethyl)	0	3.71996e+07	0	3.269e-07	70.01	2.9083e-06	2	1650.74	0.379694	45.0646	0
	High	mEVTADQPR	1	2	1	4503929	N-Term(Acetyl)	0	6.09076e+06	0	2.941e-05	53.92	9.6511e-05	2	1088.5	-2.08327	34.1372	0
	High	NANGDPVcNAcGLYYK	1	4	1	4503929	C8(Carbamidomethyl); C11(Carbamidomethyl)	0	7.17083e+06	0	0.0001979	48.46	0.000413426	2	1815.78	1.36601	41.1528	0
	High	NSSFNPAALSR	1	2	1	4503929		0	1.29724e+07	0	3.456e-10	46.75	0.000969035	2	1163.58	1.11839	38.8886	0
	High	DVSPDPSLSTPGSAGSAR	1	2	1	4503929		0	2.61377e+07	0	5.734e-15	46.46	0.00100545	2	1700.81	1.92023	33.3848	0
	High	DGTGHYLcNAcGLYHK	2	6	1	4503929	C8(Carbamidomethyl); C11(Carbamidomethyl)	0	5.18536e+06	0	7.255e-06	24.62	0.0871488	3	1865.8	-1.23719	36.1097	0
	High	VHDSLEDFPK	1	2	1	4503929		0	7.81975e+06	0.001	0.001838	28.02	0.0465395	2	1186.57	-1.98092	36.5164	0
58530840	desmoplakin isoform I [Homo sapiens]	229.434	8.6	2	22	22	24	5.10202e+06	2871	331.569	6.81494
	A4	Sequence	# PSMs	# Proteins	# Protein Groups	Protein Group Accessions	Modifications	ΔCn	Area	q-Value	PEP	IonScore	Exp Value	Charge	MH+ [Da]	ΔM [ppm]	RT [min]	# Missed Cleavages
	High	FGDSNTVmR	1	2	1	58530840	M8(Oxidation)	0	1.293e+06	0	4.803e-10	67.78	2.84266e-06	2	1042.46	0.283668	17.7345	0
	High	ITNLTQQLEQASIVK	1	1	1	58530840		0	1.35712e+06	0	4.206e-16	65.99	7.2635e-06	2	1685.94	-1.45189	59.6851	0
	High	LNDSILQATEQR	1	1	1	58530840		0	5.99576e+06	0	1.936e-05	61.89	3.1257e-05	2	1387.72	2.24067	43.8707	0
	High	FGDSNTVMR	1	2	1	58530840		0	1.44975e+06	0	0.0002504	51.1	0.000177761	2	1026.47	2.58848	26.6633	0
	High	LSSEVEALR	1	1	1	58530840		0	2.7102e+06	0	0.0002504	47.5	0.000938042	2	1003.54	1.96259	33.3873	0
	High	NTLTQTTENLR	1	1	1	58530840		0	1.96719e+06	0	0.0002504	40.05	0.0053975	2	1290.66	-0.298288	34.5997	0
	High	LLEAQIATGGIIDPK	1	2	1	58530840		0	2.70146e+06	0	1.756e-09	35.94	0.00490265	2	1538.88	0.338448	57.8251	0
	High	NQcTQVVQER	1	2	1	58530840	C3(Carbamidomethyl)	0	701913	0	0.0002504	32.12	0.0189652	2	1261.59	-0.597029	18.1652	0
	High	IEVLEEELR	1	2	1	58530840		0	3.38389e+06	0	0.0002504	31.62	0.032711	2	1129.61	1.22558	49.8924	0
	High	GFFDPNTEENLTYLQLK	1	2	1	58530840		0	0	0	7.394e-08	31.32	0.03767	2	2028.99	0.66638	65.9841	0
	High	QLQNIIQATSR	1	2	1	58530840		0	2.21065e+06	0	0.000275	24.03	0.144902	2	1271.71	-0.351452	42.0665	0
	High	YGDGIQLTR	1	2	1	58530840		0	1.73044e+06	0	0.0002504	23.54	0.155791	2	1022.53	-0.511209	34.6066	0
	High	SAIYQLEEEYENLLK	1	2	1	58530840		0	200934	0	0.0002504	11.87	3.29616	2	1841.92	1.32783	70.5935	0
	High	TmIQSPSGVILQEAADVHAR	1	2	1	58530840	M2(Oxidation)	0	4.80917e+06	0	0.001838	10.74	4.44859	3	2139.09	1.37549	57.8181	0
	High	SQLQISNNR	1	1	1	58530840		0	1.81169e+06	0.001	0.001838	25.97	0.121153	2	1059.55	0.061835	20.7584	0
	High	AITGFDDPFSGK	1	2	1	58530840		0	1.49782e+06	0.001	0.001838	17.87	0.596064	2	1254.6	-0.401982	56.2213	0
	High	AELIVQPELK	1	2	1	58530840		0	1.86721e+06	0.002	0.001865	21.43	0.100003	2	1139.67	0.901244	47.6528	0
	High	VLLQEEGTR	1	2	1	58530840		0	4.50113e+06	0.002	0.002456	18.75	0.56608	2	1044.57	-0.159297	27.4606	0
	High	NQFETEINITK	1	1	1	58530840		0	697593	0.002	0.001838	14.54	1.78944	2	1336.68	0.907781	45.2388	0
	High	VTQLTDR	1	2	1	58530840		0	925741	0.003	0.03014	17.52	0.903641	2	832.453	1.36521	14.8807	0
	High	YIELLTR	2	2	1	58530840		0	1.6403e+06	0.004	0.0377	11.61	1.40809	2	907.527	2.07997	47.5255	0
	High	YEVTSGGGGTSR	1	2	1	58530840		0	3.20887e+06	0.005	0.04618	11.48	1.7887	2	1170.54	0.0175283	15.6944	0
	Medium	LPVEEAYK	1	2	1	58530840		0	1.15817e+06	0.012	0.1211	14.9	1.48691	2	948.504	0.513113	30.0541	0
224028246	non-POU domain-containing octamer-binding protein isoform 1 [Homo sapiens]	220.693	30.15	2	12	12	21	1.24005e+07	471	54.1973	8.95361
	A4	Sequence	# PSMs	# Proteins	# Protein Groups	Protein Group Accessions	Modifications	ΔCn	Area	q-Value	PEP	IonScore	Exp Value	Charge	MH+ [Da]	ΔM [ppm]	RT [min]	# Missed Cleavages
	High	FGQAATMEGIGAIGGTPPAFNR	2	2	1	224028246		0	4.48948e+06	0	1.505e-15	78.95	6.93422e-07	2	2163.07	1.78362	60.8503	0
	High	MGQMAMGGAMGINNR	1	2	1	224028246		0	2.15393e+06	0	6.045e-07	62.63	1.09697e-05	2	1538.67	-1.26159	43.3658	0
	High	AGEVFIHK	1	2	1	224028246		0	7.30182e+06	0	0.0002373	48.01	0.000454609	2	900.494	-0.270327	23.2621	0
	High	FAcHSASLTVR	2	2	1	224028246	C3(Carbamidomethyl)	0	2.61665e+06	0	8.62e-12	43.1	0.00214278	3	1248.61	-0.679695	28.1888	0
	High	LFVGNLPPDITEEEMR	2	1	1	224028246		0	9.27054e+06	0	1.498e-06	37.32	0.00960129	2	1859.92	1.60997	62.4164	0
	High	FAQPGSFEYEYAMR	1	2	1	224028246		0	1.04774e+07	0	0.0002504	27.39	0.0540785	2	1695.75	1.08491	55.1564	0
	High	GIVEFSGKPAAR	1	2	1	224028246		0	4.86452e+06	0	0.0002504	27.25	0.0739332	2	1231.68	-0.637207	32.0392	0
	High	LFVGNLPPDITEEEmR	1	1	1	224028246	M15(Oxidation)	0	1.53705e+06	0	0.0002539	9.67	5.89105	2	1875.92	-0.378289	61.5529	0
	High	VELDNMPLR	1	2	1	224028246		0	1.74534e+07	0.001	0.001838	53.96	0.000161319	2	1086.56	1.84869	45.3331	0
	High	FAQPGSFEYEYAmR	1	2	1	224028246	M13(Oxidation)	0	1.434e+06	0.001	0.001838	21.01	0.200503	2	1711.74	-3.15724	48.3316	0
	High	EKLEMEMEAAR	2	2	1	224028246		0	2.94015e+06	0.002	0.001838	23.99	0.152228	2	1336.62	-1.50504	34.4972	1
	High	RMEELHNQEVQK	1	2	1	224028246		0	397885	0.002	0.0173	23.97	0.183797	2	1540.75	-0.562117	16.3843	1
	High	AAPGAEFAPNKR	1	2	1	224028246		0	3194542	0.002	0.007008	19.12	0.454333	2	1228.64	-0.308768	23.2642	1
	High	mGQMAMGGAMGINNR	3	2	1	224028246	M1(Oxidation)	0	1.04239e+06	0.002	0.003902	11.42	1.3016	2	1554.67	0.451822	40.9634	0
	Medium	AAPGAEFAPNK	1	2	1	224028246		0	549782	0.015	0.1252	15.47	0.987596	1	1072.54	1.12419	26.9261	0
316659409	actin, cytoplasmic 2 [Homo sapiens]	214.088	33.07	5	1	8	12	2.09891e+07	375	41.7658	5.47803
	A4	Sequence	# PSMs	# Proteins	# Protein Groups	Protein Group Accessions	Modifications	ΔCn	Area	q-Value	PEP	IonScore	Exp Value	Charge	MH+ [Da]	ΔM [ppm]	RT [min]	# Missed Cleavages
	High	eEEIAALVIDNGSGMcK	1	1	1	316659409	N-Term(Acetyl); C16(Carbamidomethyl)	0	4.28883e+06	0	4.206e-16	99.49	5.57804e-09	2	1877.86	1.46091	69.2702	0
	High	DLYANTVLSGGTTMYPGIADR	2	2	2	316659409;4501885		0	2.31675e+06	0	1.323e-13	58.39	8.79405e-05	2	2215.07	0.470062	62.1466	0
	High	eEEIAALVIDNGSGmcK	1	1	1	316659409	N-Term(Acetyl); M15(Oxidation); C16(Carbamidomethyl)	0	561917	0	4.206e-16	50.91	0.000334927	2	1893.86	-0.249432	66.9171	0
	High	VAPEEHPVLLTEAPLNPK	2	2	2	316659409;4501885		0	3.79439e+07	0	4.102e-06	41.16	0.00192548	2	1954.07	2.62344	50.8449	0
	High	GYSFTTTAER	1	2	2	316659409;4501885		0	1.11816e+07	0	0.0002504	38.56	0.00376152	2	1132.53	1.67315	32.8487	0
	High	SYELPDGQVITIGNER	2	10	3	316659409;4501889;4501885		0	1.35278e+06	0	5.37e-08	35.2	0.017561	2	1790.89	0.0134415	60.9792	0
	High	LcYVALDFEQEMATAASSSSLEK	1	3	2	316659409;4501885	C2(Carbamidomethyl)	0	913407	0	5.744e-07	20.07	0.462485	3	2550.17	0.350384	69.4142	0
	High	DLTDYLMK	1	8	3	316659409;4501889;4501885		0	740361	0.002	0.001838	23.59	0.111349	1	998.485	-1.36801	55.7966	0
	Medium	EITALAPSTMK	1	7	3	316659409;4501889;4501885		0	1.38417e+07	0.017	0.1515	24	0.208807	2	1161.62	-0.101211	40.0889	0
4503571	alpha-enolase isoform 1 [Homo sapiens]	213.932	21.89	5	7	7	8	7.98851e+06	434	47.1393	7.38623
	A4	Sequence	# PSMs	# Proteins	# Protein Groups	Protein Group Accessions	Modifications	ΔCn	Area	q-Value	PEP	IonScore	Exp Value	Charge	MH+ [Da]	ΔM [ppm]	RT [min]	# Missed Cleavages
	High	AAVPSGASTGIYEALELR	2	4	1	4503571		0	6.74079e+06	0	4.206e-16	116.12	1.17896e-10	2	1804.95	2.48906	63.0616	0
	High	VNQIGSVTESLQAcK	1	4	1	4503571	C14(Carbamidomethyl)	0	1.09864e+07	0	4.206e-16	83.41	2.35543e-07	2	1633.82	1.78913	44.2662	0
	High	GNPTVEVDLFTSK	1	1	1	4503571		0	5892726	0	8.17e-11	64.25	2.08402e-05	2	1406.72	-0.446095	55.7701	0
	High	YISPDQLADLYK	1	2	1	4503571		0	5.37879e+06	0	5.563e-07	32.7	0.0246498	2	1425.72	-1.24185	60.3083	0
	High	DATNVGDEGGFAPNILENK	1	2	1	4503571		0	6.23835e+06	0	1.961e-07	22.99	0.230073	2	1960.93	1.59248	55.2649	0
	High	ScNcLLLK	1	2	1	4503571	C2(Carbamidomethyl); C4(Carbamidomethyl)	0	2.43336e+06	0.002	0.001838	22.56	0.239598	2	1007.5	-1.1113	36.4191	0
	Medium	IGAEVYHNLK	1	2	1	4503571		0	1.11103e+06	0.02	0.2195	23.65	0.198715	3	1143.62	0.831604	29.5668	0
157412270	heterogeneous nuclear ribonucleoprotein M isoform b [Homo sapiens]	212.687	22.43	2	12	12	13	1.29217e+07	691	73.5724	8.82178
	A4	Sequence	# PSMs	# Proteins	# Protein Groups	Protein Group Accessions	Modifications	ΔCn	Area	q-Value	PEP	IonScore	Exp Value	Charge	MH+ [Da]	ΔM [ppm]	RT [min]	# Missed Cleavages
	High	aAGVEAAAEVAATEIK	1	2	1	157412270	N-Term(Acetyl)	0	3.0311e+07	0	5.681e-16	100.81	3.63475e-09	2	1542.8	1.89679	68.3443	0
	High	VGEVTYVELLMDAEGK	1	2	1	157412270		0	2.063e+06	0	4.206e-16	76.57	1.10367e-06	2	1752.87	-1.34437	68.6087	0
	High	QGGGGGGGSVPGIER	1	2	1	157412270		0	5.63506e+06	0	2.31e-05	52.8	0.000197852	2	1284.63	0.100231	25.3711	0
	High	MGANNLER	1	2	1	157412270		0	1.69405e+06	0	0.0002504	43.56	0.00132387	2	904.43	-0.125802	19.0736	0
	High	MGANSLER	1	2	1	157412270		0	2.81918e+06	0	0.001838	38.94	0.00483132	2	877.421	1.23274	20.2339	0
	High	MEEESGAPGVPSGNGAPGPK	1	2	1	157412270		0	1.66962e+06	0	0.0007363	10.82	3.48564	2	1867.85	2.27526	29.8246	0
	High	MGGMEGPFGGGMENMGR	1	2	1	157412270		0	827106	0.001	0.001838	17.73	0.24202	2	1714.68	0.72258	55.6757	0
	High	MGPAIER	1	2	1	157412270		0	1.81372e+06	0.002	0.003798	42.65	0.00116256	2	773.397	-0.372305	23.0269	0
	High	LGGAGMER	1	2	1	157412270		0	1.29131e+06	0.002	0.005061	26.92	0.0655435	2	790.388	0.0260329	15.5622	0
	High	GcAVVEFK	1	2	1	157412270	C2(Carbamidomethyl)	0	0	0.004	0.03464	24.32	0.132768	1	909.452	2.05282	33.4494	0
	High	mGPAMGPALGAGIER	2	2	1	157412270	M1(Oxidation)	0	1.22624e+06	0.009	0.0988	19.13	0.510712	2	1443.71	3.31511	46.7772	0
	Medium	FEPYANPTK	1	2	1	157412270		0	215992	0.018	0.1604	11.16	3.49112	1	1066.52	1.68352	29.1731	0
4885375	histone H1.2 [Homo sapiens]	206.633	28.64	4	2	8	16	1.14015e+08	213	21.3517	10.9312
	A4	Sequence	# PSMs	# Proteins	# Protein Groups	Protein Group Accessions	Modifications	ΔCn	Area	q-Value	PEP	IonScore	Exp Value	Charge	MH+ [Da]	ΔM [ppm]	RT [min]	# Missed Cleavages
	High	sETAPAAPAAAPPAEK	2	1	1	4885375	N-Term(Acetyl)	0	9.81557e+07	0	2.126e-08	66.48	1.04918e-05	2	1520.76	1.6834	29.7718	0
	High	KASGPPVSELITK	2	3	2	4885377;4885375		0	2.74434e+07	0	7.095e-09	61.34	1.77752e-05	2	1326.76	0.408485	38.6162	1
	High	SGVSLAALK	4	3	2	4885377;4885375		0	1.39107e+07	0	0.000489	61.07	3.11088e-05	2	845.51	0.43376	41.6748	0
	High	ASGPPVSELITK	3	3	2	4885377;4885375		0	1.70924e+08	0	6.085e-08	50.1	0.000319068	2	1198.67	-0.159479	44.1431	0
	High	ALAAAGYDVEK	2	5	2	4885377;4885375		0	7.29643e+07	0	0.0002504	47.93	0.000707073	1	1107.57	1.20689	31.6315	0
	High	SGVSLAALKK	1	3	2	4885377;4885375		0	5813663	0	0.0008979	32.11	0.00821261	2	973.606	1.44314	33.118	1
	High	sETAPAAPAAAPPAEKAPVK	1	1	1	4885375	N-Term(Acetyl)	0	801537	0.001	0.001838	15.94	1.16008	2	1916.01	-1.20399	32.0945	1
	Medium	GTLVQTK	1	5	3	4885377;4885375;4885381		0	1.4885e+06	0.015	0.1298	9.92	4.09983	1	746.441	-0.131956	12.7975	0
167466173	heat shock 70 kDa protein 1A/1B [Homo sapiens]	195.563	16.54	2	5	9	10	3.19624e+07	641	70.009	5.65576
	A4	Sequence	# PSMs	# Proteins	# Protein Groups	Protein Group Accessions	Modifications	ΔCn	Area	q-Value	PEP	IonScore	Exp Value	Charge	MH+ [Da]	ΔM [ppm]	RT [min]	# Missed Cleavages
	High	NQVALNPQNTVFDAK	1	1	1	167466173		0	1.96673e+07	0	4.206e-16	87.19	9.01451e-08	2	1658.85	0.323131	47.9066	0
	High	TTPSYVAFTDTER	1	6	2	5729877;167466173		0	5.31662e+07	0	7.684e-12	61.33	2.43685e-05	2	1487.7	1.41523	44.5289	0
	High	DAGVIAGLNVLR	1	2	1	167466173		0	5.36e+06	0	2.571e-10	54.43	7.44595e-05	2	1197.7	2.17762	60.8676	0
	High	AQIHDLVLVGGSTR	1	1	1	167466173		0	2.98582e+06	0	6.903e-06	45.79	0.000760582	2	1465.81	-0.193785	44.1386	0
	High	ATAGDTHLGGEDFDNR	2	3	1	167466173		0	2.86168e+06	0	0.000254	41.11	0.00197488	2	1675.73	1.60809	29.2831	0
	High	VEIIANDQGNR	1	7	3	167466173;5729877;16507237		0	2.30538e+07	0	0.0002504	37.87	0.00700579	2	1228.63	-0.995133	26.1737	0
	High	NALESYAFNMK	1	2	1	167466173		0	6.31793e+06	0	0.0002504	28.55	0.0448234	2	1287.6	0.534703	54.1795	0
	High	LIGDAAK	1	6	3	5729877;167466173;16507237		0	2.39196e+06	0.002	0.01622	10.64	4.02579	1	687.405	1.5301	14.1137	0
	Medium	ITITNDK	1	5	2	5729877;167466173		0	535074	0.017	0.1509	11.7	3.42774	1	804.447	1.56311	17.6266	0
4885377	histone H1.3 [Homo sapiens]	192.953	25.79	4	1	7	14	9.9914e+07	221	22.3363	11.019
	A4	Sequence	# PSMs	# Proteins	# Protein Groups	Protein Group Accessions	Modifications	ΔCn	Area	q-Value	PEP	IonScore	Exp Value	Charge	MH+ [Da]	ΔM [ppm]	RT [min]	# Missed Cleavages
	High	KASGPPVSELITK	2	3	2	4885377;4885375		0	2.74434e+07	0	7.095e-09	61.34	1.77752e-05	2	1326.76	0.408485	38.6162	1
	High	SGVSLAALK	4	3	2	4885377;4885375		0	1.39107e+07	0	0.000489	61.07	3.11088e-05	2	845.51	0.43376	41.6748	0
	High	sETAPLAPTIPAPAEK	1	1	1	4885377	N-Term(Acetyl)	0	5.58536e+07	0	2.46e-10	52.49	0.000242364	2	1634.86	0.241592	51.6952	0
	High	ASGPPVSELITK	3	3	2	4885377;4885375		0	1.70924e+08	0	6.085e-08	50.1	0.000319068	2	1198.67	-0.159479	44.1431	0
	High	ALAAAGYDVEK	2	5	2	4885377;4885375		0	7.29643e+07	0	0.0002504	47.93	0.000707073	1	1107.57	1.20689	31.6315	0
	High	SGVSLAALKK	1	3	2	4885377;4885375		0	5813663	0	0.0008979	32.11	0.00821261	2	973.606	1.44314	33.118	1
	Medium	GTLVQTK	1	5	3	4885377;4885375;4885381		0	1.4885e+06	0.015	0.1298	9.92	4.09983	1	746.441	-0.131956	12.7975	0
5031635	cofilin-1 [Homo sapiens]	191.485	50.6	3	6	7	9	1.77667e+07	166	18.4907	8.08936
	A4	Sequence	# PSMs	# Proteins	# Protein Groups	Protein Group Accessions	Modifications	ΔCn	Area	q-Value	PEP	IonScore	Exp Value	Charge	MH+ [Da]	ΔM [ppm]	RT [min]	# Missed Cleavages
	High	EILVGDVGQTVDDPYATFVK	1	1	1	5031635		0	1.25308e+06	0	4.206e-16	95.41	1.4833e-08	2	2166.1	1.97884	64.2729	0
	High	LGGSAVISLEGKPL	1	1	1	5031635		0	4.75236e+06	0	4.248e-09	70.83	1.68099e-06	2	1340.78	-0.077111	58.2423	0
	High	aSGVAVSDGVIK	3	1	1	5031635	N-Term(Acetyl)	0	2.80066e+07	0	0.0002504	50.71	0.000380857	1	1144.62	0.279158	43.6233	0
	High	HELQANcYEEVK	1	1	1	5031635	C7(Carbamidomethyl)	0	3.10034e+06	0	1.061e-10	47.77	0.000461221	2	1519.68	0.242696	26.7501	0
	High	NIILEEGKEILVGDVGQTVDDPYATFVK	1	1	1	5031635		0	1.3276e+06	0	5.103e-06	30.02	0.0357351	3	3062.6	1.52985	68.8955	1
	High	YALYDATYETK	1	3	1	5031635		0	20541026	0	0.0001924	17.82	0.611226	2	1337.63	-0.340469	42.0734	0
	High	MIYASSK	1	5	2	5031635;5802966		0	1.52562e+06	0.005	0.04879	15.29	0.631536	1	799.399	-3.46811	17.155	0
4502491	complement component 1 Q subcomponent-binding protein, mitochondrial precursor [Homo sapiens]	180.079	31.56	1	5	5	9	1.04041e+07	282	31.3426	4.84326
	A4	Sequence	# PSMs	# Proteins	# Protein Groups	Protein Group Accessions	Modifications	ΔCn	Area	q-Value	PEP	IonScore	Exp Value	Charge	MH+ [Da]	ΔM [ppm]	RT [min]	# Missed Cleavages
	High	AFVDFLSDEIKEER	2	1	1	4502491		0	4.96025e+06	0	0.0002504	63.79	1.93038e-05	2	1697.84	-0.143168	63.3598	1
	High	VEEQEPELTSTPNFVVEVIK	2	1	1	4502491		0	1.18985e+07	0	4.206e-16	58.61	6.48666e-05	2	2287.18	2.01346	65.8365	0
	High	MSGGWELELNGTEAK	1	1	1	4502491		0	8.20849e+06	0	2.328e-15	54.33	0.000151281	2	1621.76	2.02727	55.2531	0
	High	EVSFQSTGESEWK	1	1	1	4502491		0	1.11053e+07	0	1.929e-06	41.52	0.00173354	2	1513.67	-5.80758	42.8233	0
	High	mSGGWELELNGTEAK	2	1	1	4502491	M1(Oxidation)	0	0	0	1.42e-06	38.75	0.00487402	2	1637.75	2.13093	53.8291	0
	High	ALVLDcHYPEDEVGQEDEAESDIFSIR	1	1	1	4502491	C6(Carbamidomethyl)	0	730676	0	0.0002971	13.19	1.85657	3	3136.41	1.57701	64.0466	0
14141161	heterogeneous nuclear ribonucleoprotein U isoform b [Homo sapiens]	177.731	14.02	2	9	9	10	11548809	806	88.9242	5.78271
	A4	Sequence	# PSMs	# Proteins	# Protein Groups	Protein Group Accessions	Modifications	ΔCn	Area	q-Value	PEP	IonScore	Exp Value	Charge	MH+ [Da]	ΔM [ppm]	RT [min]	# Missed Cleavages
	High	NFILDQTNVSAAAQR	2	2	1	14141161		0	1.71222e+07	0	8.647e-14	74.82	1.80461e-06	2	1647.85	2.31889	49.5799	0
	High	YNILGTNTIMDK	1	2	1	14141161		0	7.35201e+06	0	0.0002504	54.52	0.000154871	2	1382.7	2.24516	55.2393	0
	High	SSGPTSLFAVTVAPPGAR	1	2	1	14141161		0	5.10114e+06	0	2.805e-06	47.79	0.000711941	2	1714.91	-0.0421339	61.2624	0
	High	EKPYFPIPEEYTFIQNVPLEDR	1	2	1	14141161		0	2.0833e+06	0	6.84e-13	31.14	0.0458402	3	2724.36	0.0986833	67.5824	0
	High	GYFEYIEENK	1	2	1	14141161		0	4.33402e+06	0	0.0002504	26.79	0.0599963	2	1291.58	-1.88038	51.0661	0
	High	DLPEHAVLK	1	2	1	14141161		0	1.01722e+07	0.001	0.001838	28.3	0.0406015	2	1021.57	0.432211	30.4365	0
	High	FIEIAAR	1	2	1	14141161		0	3.2463e+06	0.002	0.01487	20.95	0.250298	2	819.472	-0.773686	37.8554	0
	High	LLEQYKEESK	1	2	1	14141161		0	3.50319e+06	0.002	0.002144	11.36	2.72715	2	1266.66	0.955092	22.4611	1
	Medium	NGQDLGVAFK	1	2	1	14141161		0	0	0.033	0.2451	17.79	0.834201	2	1048.55	3.18396	42.1769	0
4501885	actin, cytoplasmic 1 [Homo sapiens]	177.623	33.07	5	1	8	14	2.09891e+07	375	41.7097	5.47803
	A4	Sequence	# PSMs	# Proteins	# Protein Groups	Protein Group Accessions	Modifications	ΔCn	Area	q-Value	PEP	IonScore	Exp Value	Charge	MH+ [Da]	ΔM [ppm]	RT [min]	# Missed Cleavages
	High	dDDIAALVVDNGSGMcK	1	1	1	4501885	N-Term(Acetyl); C16(Carbamidomethyl)	0	1.04681e+07	0	4.206e-16	65.53	1.04962e-05	2	1821.8	0.622685	64.1268	0
	High	DLYANTVLSGGTTMYPGIADR	2	2	2	316659409;4501885		0	2.31675e+06	0	1.323e-13	58.39	8.79405e-05	2	2215.07	0.470062	62.1466	0
	High	dDDIAALVVDNGSGmcK	3	1	1	4501885	N-Term(Acetyl); M15(Oxidation); C16(Carbamidomethyl)	0	2.24918e+06	0	1.305e-14	42.71	0.00143326	2	1837.8	1.85646	62.4612	0
	High	VAPEEHPVLLTEAPLNPK	2	2	2	316659409;4501885		0	3.79439e+07	0	4.102e-06	41.16	0.00192548	2	1954.07	2.62344	50.8449	0
	High	GYSFTTTAER	1	2	2	316659409;4501885		0	1.11816e+07	0	0.0002504	38.56	0.00376152	2	1132.53	1.67315	32.8487	0
	High	SYELPDGQVITIGNER	2	10	3	316659409;4501889;4501885		0	1.35278e+06	0	5.37e-08	35.2	0.017561	2	1790.89	0.0134415	60.9792	0
	High	LcYVALDFEQEMATAASSSSLEK	1	3	2	316659409;4501885	C2(Carbamidomethyl)	0	913407	0	5.744e-07	20.07	0.462485	3	2550.17	0.350384	69.4142	0
	High	DLTDYLMK	1	8	3	316659409;4501889;4501885		0	740361	0.002	0.001838	23.59	0.111349	1	998.485	-1.36801	55.7966	0
	Medium	EITALAPSTMK	1	7	3	316659409;4501889;4501885		0	1.38417e+07	0.017	0.1515	24	0.208807	2	1161.62	-0.101211	40.0889	0
10800140	histone H2B type 1-B [Homo sapiens]	173.29	41.27	6	2	6	13	2.00236e+08	126	13.9416	10.3159
	A4	Sequence	# PSMs	# Proteins	# Protein Groups	Protein Group Accessions	Modifications	ΔCn	Area	q-Value	PEP	IonScore	Exp Value	Charge	MH+ [Da]	ΔM [ppm]	RT [min]	# Missed Cleavages
	High	AmGImNSFVNDIFER	1	14	2	18105048;10800140	M2(Oxidation); M5(Oxidation)	0	2.96331e+06	0	4.349e-10	61.41	2.81157e-05	2	1775.81	-0.326584	64.8145	0
	High	AMGImNSFVNDIFER	2	14	2	18105048;10800140	M5(Oxidation)	0	1.80462e+06	0	8.775e-05	52.3	0.000234065	2	1759.81	-1.69302	67.1675	0
	High	QVHPDTGISSK	4	15	2	18105048;10800140		0	1.93749e+08	0	0.0002504	49.38	0.000440619	3	1168.59	-0.691426	14.5437	0
	High	KESYSIYVYK	1	5	1	10800140		0	8.71678e+06	0	0.0002504	49.36	0.000533617	2	1279.66	-0.940919	38.7628	1
	High	ESYSIYVYK	2	5	1	10800140		0	2.88018e+07	0.002	0.01383	30.69	0.0352757	2	1151.56	1.60391	44.5312	0
	Medium	EIQTAVR	1	14	2	18105048;10800140		0	7.1975e+07	0.022	0.2419	22.67	0.278488	2	816.456	-1.17925	16.8498	0
	Medium	LLLPGELAK	2	15	2	18105048;10800140		0	3.34984e+08	0.035	0.2899	35.2	0.00152508	2	953.604	1.24088	52.4924	0
57864582	hornerin [Homo sapiens]	172.946	11.89	2	11	11	22	9.43985e+06	2850	282.228	10.0376
	A4	Sequence	# PSMs	# Proteins	# Protein Groups	Protein Group Accessions	Modifications	ΔCn	Area	q-Value	PEP	IonScore	Exp Value	Charge	MH+ [Da]	ΔM [ppm]	RT [min]	# Missed Cleavages
	High	GPYESGSGHSSGLGHR	3	2	1	57864582		0	1.89322e+07	0	2.832e-12	72.01	2.26937e-06	2	1584.72	1.00272	14.3442	0
	High	QSLGHGQHGSGSGQSPSPSR	1	2	1	57864582		0	0	0	0.0002504	45.49	0.00130509	2	1947.89	-5.704	10.1871	0
	High	YGQQGSGSGQSPSR	1	2	1	57864582		0	5.38697e+06	0	2.323e-10	45.42	0.000808125	2	1395.62	-1.12835	9.75273	0
	High	SSSGSSSSYGQHGSGSR	2	2	1	57864582		0	301228	0	6.093e-07	42.19	0.000884785	2	1614.68	1.03018	6.78882	0
	High	GSGSGQSPSYGR	4	2	1	57864582		0	4.00037e+06	0	0.0002504	34.91	0.00934649	2	1139.51	0.629289	11.196	0
	High	GSGSGQSPSSGQHGTGFGR	1	2	1	57864582		0	978350	0	0.0002065	28.3	0.0469617	2	1747.77	0.138709	15.3762	0
	High	HGSGSGQSSSYGPYR	2	2	1	57864582		0	2.24913e+06	0	0.0002504	26.51	0.0453415	2	1526.66	1.21349	17.6515	0
	High	HGSSSGSSSSYGQHGSGSR	2	2	1	57864582		0	1.06825e+06	0	0.0002504	25.33	0.0713673	2	1808.76	2.17	6.56284	0
	High	GEQHGSSSGSSSSYGQHGSGSR	4	2	1	57864582		0	2.91202e+06	0	1.733e-08	21.2	0.134268	3	2122.88	1.397	7.36039	0
	High	QSSSYGPHGYGSGR	1	2	1	57864582		0	2.18321e+06	0.001	0.001838	25.29	0.0724713	2	1439.63	1.06552	17.4116	0
	High	HGAGSGQSLSHGR	1	1	1	57864582		0	229736	0.001	0.001838	19.37	0.482099	3	1250.6	1.01936	6.60668	0
29788785	tubulin beta chain [Homo sapiens]	169.768	28.15	5	3	10	15	1.40558e+07	444	49.639	4.89404
	A4	Sequence	# PSMs	# Proteins	# Protein Groups	Protein Group Accessions	Modifications	ΔCn	Area	q-Value	PEP	IonScore	Exp Value	Charge	MH+ [Da]	ΔM [ppm]	RT [min]	# Missed Cleavages
	High	ISVYYNEATGGK	1	1	1	29788785		0	1.63021e+07	0	3.84e-09	57.32	6.58004e-05	2	1301.64	1.22941	34.8056	0
	High	IMNTFSVVPSPK	1	5	2	5174735;29788785		0	4.24954e+06	0	2.18e-11	50.51	0.000436598	2	1319.7	1.35344	51.8409	0
	High	EVDEQMLNVQNK	2	4	2	29788785;5174735		0	1.25242e+07	0	0.0002504	46.39	0.000820873	2	1446.69	-1.02129	36.1356	0
	High	LAVNMVPFPR	1	10	2	29788785;5174735		0	3.35667e+06	0	6.424e-05	42.82	0.0020713	2	1143.64	1.01811	59.7726	0
	High	TAVcDIPPR	2	6	2	29788785;5174735	C4(Carbamidomethyl)	0	826461	0	0.001626	41.5	0.00202826	2	1028.52	3.0269	27.6934	0
	High	AILVDLEPGTMDSVR	1	4	1	29788785		0	1.3341e+07	0	7.387e-09	40.73	0.00445885	2	1615.84	1.82912	60.8344	0
	High	ALTVPELTQQVFDAK	1	1	1	29788785		0	7.53097e+06	0	0.0002504	37.73	0.00615592	2	1659.9	1.55639	65.4493	0
	High	NSSYFVEWIPNNVK	1	8	2	29788785;5174735		0	3.66297e+06	0	2.304e-09	34.61	0.0187499	2	1696.83	0.24771	64.1411	0
	High	NMMAAcDPR	1	9	2	29788785;5174735	C6(Carbamidomethyl)	0	2.38845e+06	0	0.0002504	22.24	0.0477628	2	1065.43	0.603405	23.387	0
	High	EIVHIQAGQcGNQIGAK	1	6	2	5174735;29788785	C10(Carbamidomethyl)	0	0	0	0.0005873	18.1	0.800738	2	1822.92	-0.148267	34.191	0
	High	AILVDLEPGTmDSVR	3	4	1	29788785	M11(Oxidation)	0	1.5361e+06	0.002	0.01389	9.63	5.92922	2	1631.83	-0.683109	59.0249	0
194018511	keratin, type II cytoskeletal 1b [Homo sapiens]	168.987	7.27	2	2	4	9	1.7402e+08	578	61.8635	5.98584
	A4	Sequence	# PSMs	# Proteins	# Protein Groups	Protein Group Accessions	Modifications	ΔCn	Area	q-Value	PEP	IonScore	Exp Value	Charge	MH+ [Da]	ΔM [ppm]	RT [min]	# Missed Cleavages
	High	FLEQQNQVLQTK	4	3	3	47132620;119395750;194018511		0	4.89323e+08	0	0.0002504	84.12	1.84528e-07	2	1475.78	-0.74131	37.8486	0
	High	FASFIDK	3	20	9	47132620;28173564;119703753;5031839;119395754;109148552;194018511;331999954;372466577		0	3.1646e+07	0.002	0.01203	23.81	0.0971151	2	827.43	0.04335	40.8821	0
	High	SKDEAEALYQTK	1	1	1	194018511		0	1.09095e+06	0.003	0.02794	14.44	1.59729	2	1382.68	-1.23175	26.2185	1
	High	QVDLLSAEQMR	1	1	1	194018511		0	0	0.003	0.02762	14.24	2.08506	2	1289.65	-0.361736	49.1045	0
378404908	glyceraldehyde-3-phosphate dehydrogenase isoform 2 [Homo sapiens]	168.822	25.26	2	5	5	5	8.91697e+06	293	31.528	7.60596
	A4	Sequence	# PSMs	# Proteins	# Protein Groups	Protein Group Accessions	Modifications	ΔCn	Area	q-Value	PEP	IonScore	Exp Value	Charge	MH+ [Da]	ΔM [ppm]	RT [min]	# Missed Cleavages
	High	IISNAScTTNcLAPLAK	1	2	1	378404908	C7(Carbamidomethyl); C11(Carbamidomethyl)	0	5.46267e+06	0	5.312e-11	89.91	6.07459e-08	2	1833.92	2.08421	44.3768	0
	High	VPTANVSVVDLTcR	1	2	1	378404908	C13(Carbamidomethyl)	0	6.36886e+06	0	9.034e-09	56.7	9.71704e-05	2	1530.8	0.768617	50.9699	0
	High	LVINGNPITIFQER	1	2	1	378404908		0	937292	0	8.264e-06	54.81	9.21731e-05	2	1613.9	0.987785	65.5826	0
	High	LISWYDNEFGYSNR	1	2	1	378404908		0	1.87207e+06	0	9.722e-11	43.13	0.00223018	2	1763.8	0.550529	61.4975	0
	High	GALQNIIPASTGAAK	1	2	1	378404908		0	1.49194e+07	0	0.001838	31.35	0.022058	2	1411.79	-3.09747	48.7059	0
154146191	heat shock protein HSP 90-alpha isoform 2 [Homo sapiens]	167.94	18.03	3	8	12	13	9.41338e+06	732	84.6067	5.021
	A4	Sequence	# PSMs	# Proteins	# Protein Groups	Protein Group Accessions	Modifications	ΔCn	Area	q-Value	PEP	IonScore	Exp Value	Charge	MH+ [Da]	ΔM [ppm]	RT [min]	# Missed Cleavages
	High	NPDDITNEEYGEFYK	1	2	1	154146191		0	5.87434e+06	0	6.043e-15	62.67	1.40596e-05	2	1833.78	1.19732	48.2624	0
	High	SLTNDWEDHLAVK	1	5	2	431822408;154146191		0	3.42466e+06	0	6.596e-10	53.06	0.000211318	2	1527.75	1.17282	50.808	0
	High	DQVANSAFVER	1	2	1	154146191		0	5.60851e+06	0	1.479e-10	49.77	0.000416483	2	1235.6	0.146381	31.094	0
	High	ADLINNLGTIAK	1	4	2	431822408;154146191		0	1.36859e+07	0	5.206e-09	43.89	0.00128621	2	1242.71	2.12604	54.9769	0
	High	YYTSASGDEMVSLK	1	2	1	154146191		0	2.02436e+06	0	1.548e-11	41.69	0.00197532	2	1550.7	-0.760108	43.2438	0
	High	FYEQFSK	1	2	1	154146191		0	320262	0.001	0.001838	42.43	0.00170301	1	948.445	-1.55954	32.6455	0
	High	YIDQEELNK	1	5	2	431822408;154146191		0	8.67989e+06	0.001	0.001838	24.2	0.154737	2	1151.56	1.04062	26.7336	0
	High	TLTIVDTGIGMTK	1	4	2	431822408;154146191		0	0	0.002	0.001838	39.68	0.00275575	2	1349.76	15.7314	55.3731	0
	High	HIYYITGETK	1	2	1	154146191		0	2.9802e+06	0.002	0.009536	16.04	0.99181	2	1224.63	0.275188	30.9639	0
	High	TLTIVDTGIGmTK	1	4	2	431822408;154146191	M11(Oxidation)	0	672918	0.002	0.006337	14.94	1.23762	2	1365.73	1.4839	49.1409	0
	High	DNSTMGYMAAK	1	2	1	154146191		0	1.4695e+06	0.003	0.02392	15.06	0.488106	2	1188.5	2.10274	29.139	0
	Medium	ALLFVPR	1	3	1	154146191		0	866194	0.033	0.2564	11.51	1.5433	2	815.515	0.985514	54.331	0
	Medium	RAPFDLFENR	1	2	1	154146191		0	971901	0.04	0.394	9.77	5.06106	2	1264.64	0.383608	55.4389	1
193794814	fructose-bisphosphate aldolase A isoform 1 [Homo sapiens]	159.814	37.09	4	10	10	13	2.19553e+07	364	39.3953	8.08936
	A4	Sequence	# PSMs	# Proteins	# Protein Groups	Protein Group Accessions	Modifications	ΔCn	Area	q-Value	PEP	IonScore	Exp Value	Charge	MH+ [Da]	ΔM [ppm]	RT [min]	# Missed Cleavages
	High	GVVPLAGTNGETTTQGLDGLSER	2	2	1	193794814		0	1.31696e+07	0	4.206e-16	75.63	1.43738e-06	2	2272.14	0.424456	54.5234	0
	High	YTPSGQAGAAASESLFVSNHAY	1	2	1	193794814		0	4.5744e+06	0	4.206e-16	59.82	4.88326e-05	2	2228.03	1.16806	55.3012	0
	High	GILAADESTGSIAK	1	2	1	193794814		0	3.4458e+07	0	1.822e-06	38.86	0.00704042	2	1332.7	0.822731	37.953	0
	High	ALANSLAcQGK	2	2	1	193794814	C8(Carbamidomethyl)	0	1.82384e+07	0	0.0007599	36.01	0.0113401	2	1132.58	1.79091	25.6091	0
	High	YASIcQQNGIVPIVEPEILPDGDHDLK	1	3	1	193794814	C5(Carbamidomethyl)	0	0	0	0.001293	24.25	0.207462	3	3020.51	2.39033	63.8672	0
	High	LQSIGTENTEENR	1	2	1	193794814		0	1.11888e+07	0	0.0004373	18.72	0.581417	2	1490.71	0.475347	23.6016	0
	High	QLLLTADDR	1	2	1	193794814		0	5.22301e+06	0.002	0.001838	34.75	0.0152744	2	1044.57	-0.509883	38.6277	0
	High	VLAAVYK	1	4	1	193794814		0	1.7743e+06	0.002	0.009034	32.31	0.00957608	1	763.472	1.48115	28.7675	0
	High	RLQSIGTENTEENR	1	2	1	193794814		0	845627	0.002	0.001838	25.44	0.144023	2	1646.81	1.14374	21.0321	1
	High	ALQASALK	2	2	1	193794814		0	3.57855e+06	0.004	0.04141	23.23	0.232914	1	801.483	0.443025	23.3892	0
237649049	small nuclear ribonucleoprotein Sm D2 isoform 2 [Homo sapiens]	153.135	51.85	2	6	6	8	8.3389e+06	108	12.3906	9.89111
	A4	Sequence	# PSMs	# Proteins	# Protein Groups	Protein Group Accessions	Modifications	ΔCn	Area	q-Value	PEP	IonScore	Exp Value	Charge	MH+ [Da]	ΔM [ppm]	RT [min]	# Missed Cleavages
	High	EEEEFNTGPLSVLTQSVK	1	2	1	237649049		0	5.54111e+06	0	4.206e-16	87.89	9.92398e-08	2	2006.99	-2.38927	66.6375	0
	High	HcNMVLENVK	1	2	1	237649049	C2(Carbamidomethyl)	0	1.05244e+07	0	1.301e-06	44.85	0.000865816	2	1243.59	0.953759	30.5738	0
	High	NNTQVLINcR	2	2	1	237649049	C9(Carbamidomethyl)	0	2.29396e+06	0	0.0002504	34.57	0.0173872	2	1231.62	1.31942	29.5166	0
	High	REEEEFNTGPLSVLTQSVK	2	2	1	237649049		0	8.95125e+06	0	0.0002504	20.11	0.531369	2	2163.09	-0.037106	63.8204	1
	High	GDSVIVVLR	1	2	1	237649049		0	4.52261e+06	0.001	0.001838	31.47	0.0231677	2	957.574	0.945862	47.3934	0
	High	EMWTEVPK	1	2	1	237649049		0	3.82262e+06	0.008	0.085	10.6	2.76966	2	1019.49	-1.27725	42.4712	0
4504517	heat shock protein beta-1 [Homo sapiens]	152.355	51.22	1	11	11	13	3.03431e+07	205	22.7685	6.40479
	A4	Sequence	# PSMs	# Proteins	# Protein Groups	Protein Group Accessions	Modifications	ΔCn	Area	q-Value	PEP	IonScore	Exp Value	Charge	MH+ [Da]	ΔM [ppm]	RT [min]	# Missed Cleavages
	High	QLSSGVSEIR	1	1	1	4504517		0	1.71679e+07	0	5.851e-08	59.84	5.46777e-05	2	1075.58	0.799145	30.0359	0
	High	VSLDVNHFAPDELTVK	2	1	1	4504517		0	2.45734e+07	0	2.425e-07	54.4	0.00015685	2	1783.93	1.41549	57.7946	0
	High	LATQSNEITIPVTFESR	2	1	1	4504517		0	4.9288e+07	0	7.444e-13	50.44	0.000457247	2	1905.99	-1.07014	59.6654	0
	High	LFDQAFGLPR	1	1	1	4504517		0	1.69646e+07	0	1.333e-06	36.77	0.00908832	2	1163.62	-1.30713	60.4374	0
	High	DGVVEITGK	1	1	1	4504517		0	2.68084e+06	0.002	0.001838	38.67	0.00783747	1	917.495	1.46918	28.6526	0
	High	TKDGVVEITGK	1	1	1	4504517		0	361385	0.002	0.01222	21.73	0.27025	3	1146.64	0.317616	23.5346	1
	High	QDEHGYISR	1	1	1	4504517		0	4.28573e+06	0.002	0.007286	19.29	0.306766	2	1104.51	0.877132	14.6419	0
	High	GPSWDPFR	1	1	1	4504517		0	3.66953e+06	0.005	0.04649	33.13	0.013133	2	961.451	-1.6578	56.332	0
	Medium	AQLGGPEAAK	1	1	1	4504517		0	1.59886e+07	0.026	0.2419	28.48	0.031645	2	941.504	-1.31543	15.9005	0
	Medium	VPFSLLR	1	1	1	4504517		0	2.25764e+06	0.029	0.2419	13.14	0.839549	2	831.51	1.72955	55.2629	0
	Medium	DWYPHSR	1	1	1	4504517		0	2.2892e+06	0.044	0.4491	13.37	0.683481	2	960.434	1.62755	26.8792	0
10863927	peptidyl-prolyl cis-trans isomerase A [Homo sapiens]	151.942	39.39	4	9	9	11	2.71692e+07	165	18.0009	7.81104
	A4	Sequence	# PSMs	# Proteins	# Protein Groups	Protein Group Accessions	Modifications	ΔCn	Area	q-Value	PEP	IonScore	Exp Value	Charge	MH+ [Da]	ΔM [ppm]	RT [min]	# Missed Cleavages
	High	KITIADcGQLE	1	1	1	10863927	C7(Carbamidomethyl)	0	3.12641e+07	0	3.746e-06	59.62	5.12977e-05	2	1247.63	0.470919	39.6773	1
	High	VSFELFADK	1	1	1	10863927		0	1.01643e+07	0	0.0002504	49.94	0.000301132	2	1055.54	1.36672	59.9082	0
	High	VKEGMNIVEAMER	1	1	1	10863927		0	4.20934e+06	0	9.518e-06	43.93	0.00207547	2	1505.75	2.02905	49.781	1
	High	IIPGFMcQGGDFTR	1	4	1	10863927	C7(Carbamidomethyl)	0	1.31724e+07	0	1.38e-10	37.72	0.00723509	2	1598.75	0.715767	58.7202	0
	High	VSFELFADKVPK	1	1	1	10863927		0	980979	0	2.846e-07	35.17	0.00913786	2	1379.76	0.799372	59.6899	1
	High	FEDENFILK	1	1	1	10863927		0	3.03317e+07	0	0.0007533	33.49	0.0150432	2	1154.57	1.10255	53.3781	0
	High	SIYGEKFEDENFILK	1	1	1	10863927		0	2.40606e+06	0	0.0002504	31.16	0.0411891	2	1831.91	0.450717	58.7326	1
	High	ITIADcGQLE	2	1	1	10863927	C6(Carbamidomethyl)	0	8.17585e+06	0.001	0.001838	40.75	0.00329827	2	1119.54	1.72357	43.9985	0
	High	EGMNIVEAMER	1	1	1	10863927		0	1.99117e+07	0.002	0.001838	30.29	0.0275945	2	1278.58	-0.61872	56.2099	0
	High	EGmNIVEAMER	1	1	1	10863927	M3(Oxidation)	0	1.16301e+06	0.002	0.003632	9.75	2.80173	2	1294.58	1.24239	49.6427	0
4885381	histone H1.5 [Homo sapiens]	151.445	25.22	1	5	6	10	7.80502e+07	226	22.5665	10.9165
	A4	Sequence	# PSMs	# Proteins	# Protein Groups	Protein Group Accessions	Modifications	ΔCn	Area	q-Value	PEP	IonScore	Exp Value	Charge	MH+ [Da]	ΔM [ppm]	RT [min]	# Missed Cleavages
	High	ALAAGGYDVEK	3	1	1	4885381		0	4.72512e+07	0	6.753e-08	62.24	2.46874e-05	2	1093.55	0.842232	29.9028	0
	High	sETAPAETATPAPVEK	2	1	1	4885381	N-Term(Acetyl)	0	6.9097e+07	0	2.043e-05	57.32	9.37887e-05	2	1640.8	1.10553	31.6192	0
	High	KATGPPVSELITK	1	1	1	4885381		0	1.94607e+07	0	0.0002504	45.74	0.000496036	2	1340.78	1.20497	39.5482	1
	High	ATGPPVSELITK	2	1	1	4885381		0	117802259	0	0.0002504	42.02	0.00169576	2	1212.68	-1.0842	45.8595	0
	High	NGLSLAALKK	1	1	1	4885381		0	1.65978e+06	0.003	0.03212	15.06	0.548925	2	1014.63	0.121821	39.7238	1
	Medium	GTLVQTK	1	5	3	4885377;4885375;4885381		0	1.4885e+06	0.015	0.1298	9.92	4.09983	1	746.441	-0.131956	12.7975	0
18105048	histone H2B type 1-K [Homo sapiens]	150.909	40.48	10	1	5	13	2.15052e+08	126	13.8816	10.3159
	A4	Sequence	# PSMs	# Proteins	# Protein Groups	Protein Group Accessions	Modifications	ΔCn	Area	q-Value	PEP	IonScore	Exp Value	Charge	MH+ [Da]	ΔM [ppm]	RT [min]	# Missed Cleavages
	High	AmGImNSFVNDIFER	1	14	2	18105048;10800140	M2(Oxidation); M5(Oxidation)	0	2.96331e+06	0	4.349e-10	61.41	2.81157e-05	2	1775.81	-0.326584	64.8145	0
	High	AMGImNSFVNDIFER	2	14	2	18105048;10800140	M5(Oxidation)	0	1.80462e+06	0	8.775e-05	52.3	0.000234065	2	1759.81	-1.69302	67.1675	0
	High	QVHPDTGISSK	4	15	2	18105048;10800140		0	1.93749e+08	0	0.0002504	49.38	0.000440619	3	1168.59	-0.691426	14.5437	0
	High	ESYSVYVYK	3	9	1	18105048		0	1.16423e+08	0.001	0.001838	14.65	1.39678	1	1137.55	-0.971631	39.9126	0
	Medium	EIQTAVR	1	14	2	18105048;10800140		0	7.1975e+07	0.022	0.2419	22.67	0.278488	2	816.456	-1.17925	16.8498	0
	Medium	LLLPGELAK	2	15	2	18105048;10800140		0	3.34984e+08	0.035	0.2899	35.2	0.00152508	2	953.604	1.24088	52.4924	0
91199540	dihydrolipoyl dehydrogenase, mitochondrial precursor [Homo sapiens]	150.147	20.83	1	9	9	9	7.58944e+06	509	54.143	7.85498
	A4	Sequence	# PSMs	# Proteins	# Protein Groups	Protein Group Accessions	Modifications	ΔCn	Area	q-Value	PEP	IonScore	Exp Value	Charge	MH+ [Da]	ΔM [ppm]	RT [min]	# Missed Cleavages
	High	NETLGGTcLNVGcIPSK	1	1	1	91199540	C8(Carbamidomethyl); C13(Carbamidomethyl)	0	1.05444e+07	0	5.033e-11	75.03	1.73356e-06	2	1819.87	0.975419	49.0706	0
	High	IDVSIEAASGGK	1	1	1	91199540		0	4.84256e+06	0	1.033e-12	60.63	4.47188e-05	2	1146.6	0.411858	37.1204	0
	High	NLGLEELGIELDPR	1	1	1	91199540		0	5.80819e+06	0	1.363e-06	47.28	0.000815617	2	1567.83	-0.552733	66.7755	0
	High	VcHAHPTLSEAFR	1	1	1	91199540	C2(Carbamidomethyl)	0	4.53206e+06	0	0.0002504	36.02	0.0121392	3	1524.74	0.0260706	32.4614	0
	High	EANLAASFGK	1	1	1	91199540		0	1.18664e+06	0	0.0002504	32.69	0.023011	1	1007.52	0.418843	36.5493	0
	High	GIEMSEVR	1	1	1	91199540		0	1.94022e+06	0	0.001002	31.6	0.0274657	2	920.452	1.01514	30.3096	0
	High	AEVITcDVLLVcIGR	1	1	1	91199540	C6(Carbamidomethyl); C12(Carbamidomethyl)	0	0	0	0.001838	20.58	0.41868	2	1717.9	1.49298	65.6033	0
	High	FPFAANSR	1	1	1	91199540		0	6.41567e+06	0.001	0.001838	22.92	0.184548	2	909.457	-0.425831	38.0901	0
	High	VVHVNGYGK	1	1	1	91199540		0	1.60046e+06	0.001	0.001838	13.91	1.49978	2	972.523	-3.20141	17.1529	0
303227926	matrin-3 isoform a [Homo sapiens]	148.308	11.33	2	7	7	9	8.71977e+06	847	94.5648	6.25244
	A4	Sequence	# PSMs	# Proteins	# Protein Groups	Protein Group Accessions	Modifications	ΔCn	Area	q-Value	PEP	IonScore	Exp Value	Charge	MH+ [Da]	ΔM [ppm]	RT [min]	# Missed Cleavages
	High	GNLGAGNGNLQGPR	1	2	1	303227926		0	6.51396e+06	0	4.206e-16	90.07	4.65437e-08	2	1324.67	0.528115	25.2596	0
	High	IEELDQENEAALENGIK	1	2	1	303227926		0	641205	0	2.863e-05	70.69	4.21858e-06	2	1914.93	1.75015	48.4983	0
	High	LcSLFYTNEEVAK	1	2	1	303227926	C2(Carbamidomethyl)	0	1.05547e+07	0	0.0002504	38.73	0.00590797	2	1573.76	1.41917	52.3672	0
	High	TEEGPTLSYGR	1	1	1	303227926		0	9.09065e+06	0	2.345e-05	35.16	0.0132583	2	1209.58	0.791866	31.0962	0
	High	IGPYQPNVPVGIDYVIPK	2	2	1	303227926		0	3.83491e+06	0	0.0005171	26.81	0.0486729	2	1969.08	2.10372	64.6929	0
	High	GPSLNPVLDYDHGSR	2	1	1	303227926		0	4.04418e+06	0	0.0002504	20.85	0.37782	3	1626.79	1.25178	44.8621	0
	Medium	GPGPLQER	1	1	1	303227926		0	4.02014e+06	0.031	0.2419	27.2	0.0452547	2	853.453	0.778489	20.3789	0
14043072	heterogeneous nuclear ribonucleoproteins A2/B1 isoform B1 [Homo sapiens]	147.557	31.73	2	9	9	12	5.15234e+07	353	37.4067	8.95361
	A4	Sequence	# PSMs	# Proteins	# Protein Groups	Protein Group Accessions	Modifications	ΔCn	Area	q-Value	PEP	IonScore	Exp Value	Charge	MH+ [Da]	ΔM [ppm]	RT [min]	# Missed Cleavages
	High	NMGGPYGGGNYGPGGSGGSGGYGGR	2	2	1	14043072		0	1.41219e+07	0	4.206e-16	73.69	6.66998e-07	2	2189.9	-0.509989	35.297	0
	High	LFIGGLSFETTEESLR	1	2	1	14043072		0	2.29685e+06	0	4.206e-16	62.15	2.9654e-05	2	1798.92	0.501412	66.9485	0
	High	DYFEEYGK	2	2	1	14043072		0	2.16464e+06	0	0.0002519	39.34	0.00133292	1	1050.44	-1.12683	38.3531	0
	High	GGGGNFGPGPGSNFR	2	2	1	14043072		0	1.2983e+08	0	0.0006054	30.52	0.0255945	2	1377.63	-0.85495	35.7353	0
	High	LTDcVVMR	1	2	1	14043072	C4(Carbamidomethyl)	0	5.4505e+06	0.001	0.001838	40.8	0.00390513	2	993.486	0.110794	32.4592	0
	High	TLETVPLER	1	1	1	14043072		0	1.06185e+07	0.002	0.00983	29.1	0.0452739	2	1057.59	-0.747934	38.7584	0
	High	GGNFGFGDSR	1	2	1	14043072		0	1.87737e+06	0.002	0.001838	13	0.962279	1	1013.45	2.42108	33.5501	0
	High	EESGKPGAHVTVK	1	2	1	14043072		0	4.81295e+06	0.002	0.002734	11.69	2.93758	2	1338.7	-0.677014	11.5657	0
	Medium	NYYEQWGK	1	2	1	14043072		0	6.20627e+06	0.027	0.2419	14.33	0.741645	2	1087.48	-1.39369	36.1289	0
117190254	heterogeneous nuclear ribonucleoproteins C1/C2 isoform b [Homo sapiens]	146.543	24.57	6	6	6	6	1.02867e+07	293	32.3179	5.08447
	A4	Sequence	# PSMs	# Proteins	# Protein Groups	Protein Group Accessions	Modifications	ΔCn	Area	q-Value	PEP	IonScore	Exp Value	Charge	MH+ [Da]	ΔM [ppm]	RT [min]	# Missed Cleavages
	High	MIAGQVLDINLAAEPK	1	2	1	117190254		0	7.84156e+06	0	4.206e-16	83.66	1.31311e-07	2	1682.91	-0.260935	62.6654	0
	High	SAAEMYGSSFDLDYDFQR	1	1	1	117190254		0	933230	0	1.267e-14	66.1	5.42491e-06	2	2101.88	-0.317215	62.5459	0
	High	KSDVEAIFSK	1	6	1	117190254		0	4.22064e+06	0.002	0.002987	47.36	0.000606976	2	1123.6	-0.333462	38.6255	1
	High	VPPPPPIAR	1	2	1	117190254		0	1.8798e+07	0.002	0.001838	32.13	0.0183093	2	943.574	1.50259	30.1743	0
	High	QKVDSLLENLEK	1	6	1	117190254		0	2.11716e+06	0.002	0.00689	12.76	1.94386	2	1415.78	1.37541	52.1026	1
	Medium	MYSYPAR	1	2	1	117190254		0	394614	0.045	0.4715	9.96	1.47351	1	887.408	-0.345327	25.5424	0
224282178	GDNF family receptor alpha-1 isoform b preproprotein [Homo sapiens]	143.552	8.7	2	3	3	4	6.60288e+06	460	50.8049	7.98682
	A4	Sequence	# PSMs	# Proteins	# Protein Groups	Protein Group Accessions	Modifications	ΔCn	Area	q-Value	PEP	IonScore	Exp Value	Charge	MH+ [Da]	ΔM [ppm]	RT [min]	# Missed Cleavages
	High	SAYITPcTTSVSNDVcNR	1	2	1	224282178	C7(Carbamidomethyl); C16(Carbamidomethyl)	0	4.49925e+06	0	9.35e-13	73.32	1.56903e-06	2	2044.9	-0.851231	39.9502	0
	High	LADFFTNcQPESR	2	2	1	224282178	C8(Carbamidomethyl)	0	1.22798e+07	0	3.497e-12	62.25	2.09971e-05	2	1584.71	1.26021	50.0087	0
	High	AcNLDDIcK	1	2	1	224282178	C2(Carbamidomethyl); C8(Carbamidomethyl)	0	3.02961e+06	0	0.0002504	39.47	0.0016834	2	1108.48	0.802073	29.2584	0
15431297	60S ribosomal protein L13 isoform 1 [Homo sapiens]	141.538	24.17	3	5	5	6	2.69523e+07	211	24.2465	11.6489
	A4	Sequence	# PSMs	# Proteins	# Protein Groups	Protein Group Accessions	Modifications	ΔCn	Area	q-Value	PEP	IonScore	Exp Value	Charge	MH+ [Da]	ΔM [ppm]	RT [min]	# Missed Cleavages
	High	STESLQANVQR	1	2	1	15431297		0	36413474	0	0.0002504	70.12	4.22172e-06	2	1232.62	-0.122476	23.0107	0
	High	VATWFNQPAR	1	3	1	15431297		0	2.81293e+07	0	0.0002504	52.27	0.000276303	2	1189.61	0.35359	45.2002	0
	High	LATQLTGPVmPVR	1	3	1	15431297	M10(Oxidation)	0	2.42814e+06	0	0.0002504	47.37	0.000528623	2	1398.78	-0.286795	42.0711	0
	High	LATQLTGPVMPVR	1	3	1	15431297		0	14014795	0	0.0002504	42.99	0.00104236	2	1382.78	1.5058	50.7966	0
	High	GFSLEELR	1	2	1	15431297		0	9.42268e+06	0.002	0.001898	39.66	0.00459609	2	950.497	2.79061	54.5774	0
	High	TIGISVDPR	1	2	1	15431297		0	1.63141e+07	0.002	0.001845	31.09	0.0256363	2	957.536	-0.251571	38.3487	0
83641870	nucleophosmin isoform 3 [Homo sapiens]	137.198	18.53	3	4	4	5	9.7298e+06	259	28.3827	4.71631
	A4	Sequence	# PSMs	# Proteins	# Protein Groups	Protein Group Accessions	Modifications	ΔCn	Area	q-Value	PEP	IonScore	Exp Value	Charge	MH+ [Da]	ΔM [ppm]	RT [min]	# Missed Cleavages
	High	DELHIVEAEAMNYEGSPIK	2	3	1	83641870		0	1.04542e+07	0	4.206e-16	65.45	1.61368e-05	2	2145.02	-0.0317005	62.349	0
	High	GPSSVEDIK	1	3	1	83641870		0	6.50225e+06	0	6.642e-05	59.09	5.44416e-05	2	931.474	0.436986	21.9612	0
	High	VDNDENEHQLSLR	1	3	1	83641870		0	1.2233e+07	0	0.0005621	36.57	0.00784242	2	1568.73	-1.15016	26.7665	0
	High	MQASIEK	1	3	1	83641870		0	682509	0.005	0.04258	12.51	2.32554	1	806.407	-0.44972	15.9478	0
15431306	60S ribosomal protein L8 [Homo sapiens]	137.194	19.07	1	5	5	6	2.20138e+07	257	28.0073	11.0337
	A4	Sequence	# PSMs	# Proteins	# Protein Groups	Protein Group Accessions	Modifications	ΔCn	Area	q-Value	PEP	IonScore	Exp Value	Charge	MH+ [Da]	ΔM [ppm]	RT [min]	# Missed Cleavages
	High	ASGNYATVISHNPETK	2	1	1	15431306		0	2.13806e+07	0	4.206e-16	99.19	6.26016e-09	2	1688.83	1.88454	31.4872	0
	High	AVVGVVAGGGR	1	1	1	15431306		0	3.62467e+07	0	6.35e-05	51.48	0.000121618	2	941.553	0.086781	25.8644	0
	High	AVDFAER	1	1	1	15431306		0	3.66873e+06	0.005	0.04509	27.59	0.0706303	2	807.4	-0.0849686	25.2838	0
	Medium	DIIHDPGR	1	1	1	15431306		0	8.41417e+06	0.015	0.1331	25.45	0.100783	2	922.475	0.6805	21.8478	0
	Medium	IDKPILK	1	1	1	15431306		0	8.32428e+06	0.02	0.1883	29.72	0.00591961	2	826.54	0.601824	21.6598	0
4507555	thymopoietin isoform alpha [Homo sapiens]	131.465	20.32	2	6	11	11	5.43306e+06	694	75.4456	7.66455
	A4	Sequence	# PSMs	# Proteins	# Protein Groups	Protein Group Accessions	Modifications	ΔCn	Area	q-Value	PEP	IonScore	Exp Value	Charge	MH+ [Da]	ΔM [ppm]	RT [min]	# Missed Cleavages
	High	EPLVATNLPGR	1	1	1	4507555		0	2.20811e+06	0	0.0002504	44.98	0.000713208	2	1166.65	0.852774	40.6203	0
	High	SSTPLPTISSSAENTR	1	3	2	4507555;73760405		0	6.1133e+06	0	6.718e-08	44.8	0.00180632	2	1647.82	-0.415506	39.3015	0
	High	AMQADISQAAQILSSDPSR	1	1	1	4507555		0	598227	0	4.206e-16	44.12	0.00194403	2	1988.97	0.894134	60.2132	0
	High	VIEEEWQQVDR	1	1	1	4507555		0	2.63667e+06	0	1.34e-09	40.59	0.00351807	2	1430.69	0.246418	42.3379	0
	High	NRPPLPAGTNSK	1	3	2	4507555;73760405		0	2.89278e+06	0	0.0002504	38.52	0.00520238	2	1251.68	0.582131	18.2681	0
	High	FQETEFLSPPR	1	1	1	4507555		0	2.44932e+06	0	0.0003618	35.04	0.0158858	2	1350.67	0.70047	51.855	0
	High	PEFLEDPSVLTK	1	3	2	4507555;73760405		0	4.72301e+06	0	0.0002504	29.23	0.0593412	2	1374.72	0.136996	56.6044	0
	High	YGVNPGPIVGTTR	1	3	2	4507555;73760405		0	5.46289e+06	0.001	0.001838	38.2	0.00727266	2	1330.71	1.13242	40.479	0
	High	EPTPVLGSGAAAAGR	1	3	2	4507555;73760405		0	2.97465e+06	0.002	0.005905	20.36	0.345629	2	1353.71	0.822282	32.3233	0
	High	GGTLFGGEVcK	1	1	1	4507555	C10(Carbamidomethyl)	0	867698	0.004	0.04016	20.23	0.34807	2	1124.54	0.0352522	39.7194	0
	Medium	EATQILSVPK	1	1	1	4507555		0	943594	0.018	0.1556	16.72	0.752297	2	1085.62	0.911965	40.8285	0
382546007	ATP synthase subunit alpha, mitochondrial isoform b precursor [Homo sapiens]	130.987	13.18	3	6	6	6	4.49628e+06	531	57.5114	9.29053
	A4	Sequence	# PSMs	# Proteins	# Protein Groups	Protein Group Accessions	Modifications	ΔCn	Area	q-Value	PEP	IonScore	Exp Value	Charge	MH+ [Da]	ΔM [ppm]	RT [min]	# Missed Cleavages
	High	ILGADTSVDLEETGR	1	3	1	382546007		0	6.43045e+06	0	4.206e-16	69.51	5.73152e-06	2	1575.79	-0.672377	45.8835	0
	High	EAYPGDVFYLHSR	1	3	1	382546007		0	2.22152e+06	0	1.879e-07	54.4	0.000190616	2	1553.73	-4.10631	51.2287	0
	High	TGTAEMSSILEER	1	2	1	382546007		0	3.58917e+06	0	0.0001326	52.37	0.000221052	2	1423.68	1.26939	49.3636	0
	High	HALIIYDDLSK	1	3	1	382546007		0	1.54052e+06	0	0.0002504	18.21	0.66368	2	1287.69	0.199098	47.9813	0
	High	AVDSLVPIGR	1	3	1	382546007		0	3.46921e+06	0.002	0.003886	29.98	0.0179826	2	1026.59	-2.49261	45.9972	0
	High	STVAQLVK	1	3	1	382546007		0	748021	0.003	0.02692	17.29	0.791345	2	845.508	-1.72004	30.8659	0
156416003	succinate dehydrogenase [ubiquinone] flavoprotein subunit, mitochondrial [Homo sapiens]	129.837	14.61	1	7	7	7	6.99549e+06	664	72.6453	7.38623
	A4	Sequence	# PSMs	# Proteins	# Protein Groups	Protein Group Accessions	Modifications	ΔCn	Area	q-Value	PEP	IonScore	Exp Value	Charge	MH+ [Da]	ΔM [ppm]	RT [min]	# Missed Cleavages
	High	AAFGLSEAGFNTAcVTK	1	1	1	156416003	C14(Carbamidomethyl)	0	6.53252e+06	0	4.206e-16	87.22	8.36447e-08	2	1743.84	-0.309576	57.2681	0
	High	VGSVLQEGcGK	1	1	1	156416003	C9(Carbamidomethyl)	0	8.59793e+06	0	0.0002504	49.17	0.000595009	2	1133.56	1.5641	23.849	0
	High	IDEYDYSKPIQGQQK	1	1	1	156416003		0	2.27486e+06	0	0.0002504	41.73	0.00344779	2	1811.88	1.39149	31.04	0
	High	NTVVATGGYGR	1	1	1	156416003		0	5.85603e+06	0	1.129e-05	31.59	0.0282918	2	1094.56	0.618158	23.1391	0
	High	AcALSIEEScRPGDK	1	1	1	156416003	C2(Carbamidomethyl); C10(Carbamidomethyl)	0	1.45398e+06	0	0.001838	11.96	2.43893	2	1692.77	0.531199	31.9471	0
	High	TYFScTSAHTSTGDGTAMITR	1	1	1	156416003	C5(Carbamidomethyl)	0	2.60572e+06	0.002	0.002129	16.15	0.861447	3	2264.99	1.39583	40.4862	0
	Medium	FADGSIR	1	1	1	156416003		0	1.16267e+06	0.018	0.1707	20.17	0.379837	2	765.389	-0.155112	21.6528	0
54873613	agrin precursor [Homo sapiens]	128.675	7.33	1	10	10	10	2.39964e+06	2045	214.706	6.40479
	A4	Sequence	# PSMs	# Proteins	# Protein Groups	Protein Group Accessions	Modifications	ΔCn	Area	q-Value	PEP	IonScore	Exp Value	Charge	MH+ [Da]	ΔM [ppm]	RT [min]	# Missed Cleavages
	High	AScYNSALGccSDGK	1	1	1	54873613	C3(Carbamidomethyl); C10(Carbamidomethyl); C11(Carbamidomethyl)	0	1.46342e+06	0	3.937e-15	77.61	8.32226e-08	2	1649.64	0.0668483	25.381	0
	High	EAAcLQQTQIEEAR	1	1	1	54873613	C4(Carbamidomethyl)	0	2.54068e+06	0	1.253e-15	68.26	6.4638e-06	2	1646.78	-1.4912	32.5997	0
	High	SIESTLDDLFR	1	1	1	54873613		0	0	0	0.0003423	27.38	0.0734896	2	1295.65	0.598827	70.0762	0
	High	SPcPSVVAPVcGSDASTYSNEcELQR	1	1	1	54873613	C3(Carbamidomethyl); C11(Carbamidomethyl); C22(Carbamidomethyl)	0	775488	0	1.262e-10	26.02	0.0747603	3	2870.24	1.81641	45.7807	0
	High	ALEPQGLLLYNGNAR	1	1	1	54873613		0	1.27033e+06	0	0.0002504	21.97	0.251273	2	1628.87	-1.5083	58.6242	0
	High	FGALcEAETGR	1	1	1	54873613	C5(Carbamidomethyl)	0	1.45778e+06	0	0.0002193	16.53	0.699231	2	1210.55	-1.104	34.4027	0
	High	ALGPAGcEADASAPATcAEMR	1	1	1	54873613	C7(Carbamidomethyl); C17(Carbamidomethyl)	0	531460	0	0.0001554	12.22	1.55646	2	2105.91	1.41852	38.3629	0
	High	VLGAPVPAFEGR	1	1	1	54873613		0	2.70394e+06	0.002	0.001907	16.96	0.546726	2	1212.67	0.922684	50.5399	0
	High	LELGIGPGAATR	1	1	1	54873613		0	1.9543e+06	0.005	0.04313	9.96	2.38688	2	1154.65	-2.21292	46.0284	0
	High	EPLYVGGAPDFSK	1	1	1	54873613		0	489128	0.008	0.0753	10.02	6.04709	2	1379.69	1.26071	48.604	0
34740329	heterogeneous nuclear ribonucleoprotein A3 [Homo sapiens]	128.18	26.98	1	7	7	9	1.49361e+07	378	39.5706	9.01221
	A4	Sequence	# PSMs	# Proteins	# Protein Groups	Protein Group Accessions	Modifications	ΔCn	Area	q-Value	PEP	IonScore	Exp Value	Charge	MH+ [Da]	ΔM [ppm]	RT [min]	# Missed Cleavages
	High	SSGSPYGGGYGSGGGSGGYGSR	2	1	1	34740329		0	9.57804e+06	0	4.206e-16	96.1	4.65167e-09	2	1910.79	0.407048	27.1236	0
	High	IETIEVMEDR	1	1	1	34740329		0	2.81985e+07	0	5.188e-09	50.38	0.000399014	2	1234.6	1.56982	44.6662	0
	High	GFAFVTFDDHDTVDK	2	1	1	34740329		0	4961522	0	4.837e-15	37.58	0.00521128	2	1713.78	0.0648068	58.7226	0
	High	WGTLTDcVVMR	1	1	1	34740329	C7(Carbamidomethyl)	0	4.79157e+06	0.002	0.0156	22.08	0.253351	2	1337.64	0.970575	54.3379	0
	High	IFVGGIKEDTEEYNLR	1	1	1	34740329		0	3.81843e+06	0.002	0.008732	10.88	3.85835	3	1882.96	1.66519	50.6817	1
	High	YHTINGHNcEVK	1	1	1	34740329	C9(Carbamidomethyl)	0	7.0319e+06	0.008	0.09345	21.07	0.272006	3	1471.68	0.650629	14.8122	0
	Medium	mEVKPPPGRPQPDSGR	1	1	1	34740329	N-Term(Acetyl)	0	3.02262e+06	0.012	0.1215	12.45	3.0519	2	1789.9	1.18763	30.4525	0
51477708	heterogeneous nuclear ribonucleoprotein D0 isoform d [Homo sapiens]	126.409	19.16	4	3	4	6	2.11567e+07	287	30.6531	8.41162
	A4	Sequence	# PSMs	# Proteins	# Protein Groups	Protein Group Accessions	Modifications	ΔCn	Area	q-Value	PEP	IonScore	Exp Value	Charge	MH+ [Da]	ΔM [ppm]	RT [min]	# Missed Cleavages
	High	IFVGGLSPDTPEEK	1	4	1	51477708		0	4.15216e+07	0	2.685e-07	65.19	1.44838e-05	2	1488.76	1.12975	47.2408	0
	High	FGEVVDcTLK	3	8	3	51477708;55956921;332801090	C7(Carbamidomethyl)	0	2.02729e+07	0	0.001838	51.86	0.000246316	2	1167.57	-1.49503	39.9434	0
	High	EYFGGFGEVESIELPMDNK	1	4	1	51477708		0	1.67566e+06	0	7.509e-11	49.84	0.000460663	2	2160.98	-1.34717	67.165	0
	High	MFIGGLSWDTTK	1	4	1	51477708		0	840977	0	4.601e-09	37.69	0.00782142	2	1355.67	0.869563	62.9566	0
11545863	methylcrotonoyl-CoA carboxylase beta chain, mitochondrial [Homo sapiens]	125.577	12.08	1	5	5	5	1.02042e+06	563	61.2944	7.6792
	A4	Sequence	# PSMs	# Proteins	# Protein Groups	Protein Group Accessions	Modifications	ΔCn	Area	q-Value	PEP	IonScore	Exp Value	Charge	MH+ [Da]	ΔM [ppm]	RT [min]	# Missed Cleavages
	High	AATGEEVSAEDLGGADLHcR	1	1	1	11545863	C19(Carbamidomethyl)	0	402116	0	2.381e-14	52	0.000222412	2	2057.92	1.58885	39.6192	0
	High	ISVMGGEQAANVLATITK	1	1	1	11545863		0	0	0	1.499e-06	51.68	0.000256399	2	1802.97	0.691443	66.1251	0
	High	VSGVEcMIIANDATVK	1	1	1	11545863	C6(Carbamidomethyl)	0	1.97403e+06	0	7.7e-16	46.91	0.00118352	2	1706.85	1.57172	54.8437	0
	High	KFEEEGNPYYSSAR	1	1	1	11545863		0	553648	0	0.001838	38.6	0.00496938	2	1676.76	0.0926326	30.489	1
	High	FEEEGNPYYSSAR	1	1	1	11545863		0	533577	0	5.223e-11	27.92	0.0309957	2	1548.66	1.59748	33.5476	0
224493972	thioredoxin domain-containing protein 5 isoform 3 [Homo sapiens]	125.051	18.83	2	5	5	7	1.07565e+07	324	36.155	5.46533
	A4	Sequence	# PSMs	# Proteins	# Protein Groups	Protein Group Accessions	Modifications	ΔCn	Area	q-Value	PEP	IonScore	Exp Value	Charge	MH+ [Da]	ΔM [ppm]	RT [min]	# Missed Cleavages
	High	VDcTQHYELcSGNQVR	2	2	1	224493972	C3(Carbamidomethyl); C10(Carbamidomethyl)	0	1.37356e+07	0	4.206e-16	63.63	1.11846e-05	2	1965.86	2.82803	29.6467	0
	High	IAEVDcTAER	1	2	1	224493972	C6(Carbamidomethyl)	0	5.22927e+06	0	1.329e-11	47.27	0.000529686	2	1163.54	0.214219	20.6411	0
	High	VDcTAHSDVcSAQGVR	1	2	1	224493972	C3(Carbamidomethyl); C10(Carbamidomethyl)	0	1.31617e+07	0	4.206e-16	45.64	0.000695889	3	1761.77	2.01397	20.0947	0
	High	FVLSQAKDEL	1	2	1	224493972		0	5.37223e+06	0.002	0.004202	33.41	0.0184923	2	1149.62	1.45746	50.8035	1
	High	EFPGLAGVK	2	2	1	224493972		0	4.4165e+06	0.002	0.002755	18.17	0.850421	1	917.51	0.669568	46.4745	0
119703744	desmoglein-1 preproprotein [Homo sapiens]	124.382	9.44	1	7	7	8	4.03886e+06	1049	113.676	5.03369
	A4	Sequence	# PSMs	# Proteins	# Protein Groups	Protein Group Accessions	Modifications	ΔCn	Area	q-Value	PEP	IonScore	Exp Value	Charge	MH+ [Da]	ΔM [ppm]	RT [min]	# Missed Cleavages
	High	YVmGNNPADLLAVDSR	2	1	1	119703744	M3(Oxidation)	0	3.80721e+06	0	2.901e-15	64.03	2.02625e-05	2	1750.85	1.95036	53.7973	0
	High	TYVVTGNmGSNDK	1	1	1	119703744	M8(Oxidation)	0	1322291	0	3.568e-09	39.71	0.00270471	2	1401.63	0.690329	19.3502	0
	High	EQYGQYALAVR	1	1	1	119703744		0	4.2058e+06	0	0.001091	29.85	0.0394389	2	1297.65	-0.901591	42.476	0
	High	ISGVGIDQPPYGIFVINQK	1	1	1	119703744		0	493757	0	0.0002504	28.59	0.0392241	2	2045.11	2.11148	65.7838	0
	High	QEPSDSPmFIINR	1	1	1	119703744	M8(Oxidation)	0	4.10357e+06	0.002	0.001838	35.86	0.0105713	2	1549.73	-0.224251	45.0815	0
	High	VGDFVATDLDTGRPSTTVR	1	1	1	119703744		0	3.10911e+06	0.002	0.001838	25.8	0.152161	3	2007.02	1.36552	46.3255	0
	High	TmNNFLDR	1	1	1	119703744	M2(Oxidation)	0	1.0647e+06	0.002	0.01665	25.37	0.0630173	2	1026.47	0.0959848	31.1994	0
194097323	enoyl-CoA hydratase, mitochondrial [Homo sapiens]	122.808	22.76	1	5	5	6	2.92611e+06	290	31.3671	8.07471
	A4	Sequence	# PSMs	# Proteins	# Protein Groups	Protein Group Accessions	Modifications	ΔCn	Area	q-Value	PEP	IonScore	Exp Value	Charge	MH+ [Da]	ΔM [ppm]	RT [min]	# Missed Cleavages
	High	AQFAQPEILIGTIPGAGGTQR	1	1	1	194097323		0	1.21315e+06	0	1.197e-11	73.58	1.54144e-06	2	2125.14	-1.12858	63.5898	0
	High	SLAMEMVLTGDR	1	1	1	194097323		0	3.74561e+06	0	1.111e-14	49.28	0.000544128	2	1322.64	-1.13518	60.0384	0
	High	LFYSTFATDDR	1	1	1	194097323		0	1.73005e+06	0	1.646e-09	46.66	0.000719608	2	1335.62	1.11796	52.1052	0
	High	NNTVGLIQLNRPK	1	1	1	194097323		0	3.30267e+06	0	7.733e-06	27.43	0.0265655	2	1466.84	-0.452709	42.0688	0
	High	AFAAGADIK	2	1	1	194097323		0	796775	0.001	0.001838	32.94	0.0226131	1	863.463	1.43452	29.0676	0
41872631	fatty acid synthase [Homo sapiens]	119.691	4.66	1	9	9	9	1.76898e+06	2511	273.254	6.44287
	A4	Sequence	# PSMs	# Proteins	# Protein Groups	Protein Group Accessions	Modifications	ΔCn	Area	q-Value	PEP	IonScore	Exp Value	Charge	MH+ [Da]	ΔM [ppm]	RT [min]	# Missed Cleavages
	High	AALQEELQLcK	1	1	1	41872631	C10(Carbamidomethyl)	0	2.05199e+06	0	8.372e-05	52.09	0.000306227	2	1302.67	0.853739	45.7497	0
	High	DPETLVGYSMVGcQR	1	1	1	41872631	C13(Carbamidomethyl)	0	0	0	1.677e-13	48	0.000604637	2	1711.77	-5.71415	53.0506	0
	High	AcLDTAVENMPSLK	1	1	1	41872631	C2(Carbamidomethyl)	0	968056	0	0.0002504	39.13	0.0054309	2	1548.75	4.93092	52.9248	0
	High	GNAGQSNYGFANSAMER	1	1	1	41872631		0	969185	0	2.646e-07	33.14	0.0119381	2	1773.76	-0.0504259	38.5406	0
	High	AFEVSENGNLVVSGK	1	1	1	41872631		0	694038	0	0.0007226	28.9	0.0680196	2	1549.78	-1.29198	45.641	0
	High	MVVPGLDGAQIPR	1	1	1	41872631		0	1.14988e+06	0	0.0002504	25.11	0.0952705	2	1352.74	1.76778	57.4304	0
	High	LSIPTYGLQcTR	1	1	1	41872631	C10(Carbamidomethyl)	0	868789	0.002	0.002099	11.13	3.72732	2	1408.73	0.890733	53.5533	0
	High	GLVQALQTK	1	1	1	41872631		0	451042	0.005	0.04194	19.74	0.345051	2	957.574	0.765087	38.9263	0
	High	LQVVDQPLPVR	1	1	1	41872631		0	2.10507e+06	0.006	0.05191	21.14	0.111139	2	1263.74	0.177092	46.9945	0
10800144	histone cluster 1, H2aj [Homo sapiens]	117.944	27.34	13	1	3	7	1.39668e+08	128	13.9278	10.8872
	A4	Sequence	# PSMs	# Proteins	# Protein Groups	Protein Group Accessions	Modifications	ΔCn	Area	q-Value	PEP	IonScore	Exp Value	Charge	MH+ [Da]	ΔM [ppm]	RT [min]	# Missed Cleavages
	High	VTIAQGGVLPNIQAVLLPK	1	10	1	10800144		0	9435073	0	2.185e-13	47.44	4.14694e-05	2	1931.17	1.11684	69.5426	0
	High	AGLQFPVGR	5	17	3	20357599;10800144;28195394		0	3.75302e+08	0	0.0002504	42.49	0.00283792	2	944.532	1.11579	45.5324	0
	High	HLQLAIR	1	17	2	20357599;10800144		0	3.42688e+07	0.004	0.03408	28.47	0.011023	2	850.526	0.45777	33.6452	0
4826898	profilin-1 [Homo sapiens]	117.014	54.29	1	6	6	7	1.77442e+07	140	15.0446	8.26514
	A4	Sequence	# PSMs	# Proteins	# Protein Groups	Protein Group Accessions	Modifications	ΔCn	Area	q-Value	PEP	IonScore	Exp Value	Charge	MH+ [Da]	ΔM [ppm]	RT [min]	# Missed Cleavages
	High	SSFYVNGLTLGGQK	2	1	1	4826898		0	8.75404e+06	0	4.408e-07	60.21	4.00174e-05	2	1470.76	-0.287552	55.7653	0
	High	STGGAPTFNVTVTK	1	1	1	4826898		0	3.76303e+07	0	0.0002504	55.33	0.000147277	2	1379.72	2.04871	41.4045	0
	High	TFVNITPAEVGVLVGK	1	1	1	4826898		0	5.68456e+06	0	6.977e-12	49.77	0.00021984	2	1643.94	-0.938624	66.4506	0
	High	DSLLQDGEFSmDLR	1	1	1	4826898	M11(Oxidation)	0	363783	0	0.001772	11.24	2.47284	2	1641.74	1.3597	60.5435	0
	High	TLVLLMGK	1	1	1	4826898		0	2.09917e+06	0.004	0.03787	18.25	0.245383	2	874.543	-0.57424	55.5246	0
	High	EGVHGGLINK	1	1	1	4826898		0	6.84842e+06	0.005	0.04871	18.43	0.406244	2	1023.56	1.60299	20.0973	0
395132436	60S ribosomal protein L18 isoform 2 [Homo sapiens]	116.757	36.48	2	5	5	6	3.1444e+07	159	18.08	11.8394
	A4	Sequence	# PSMs	# Proteins	# Protein Groups	Protein Group Accessions	Modifications	ΔCn	Area	q-Value	PEP	IonScore	Exp Value	Charge	MH+ [Da]	ΔM [ppm]	RT [min]	# Missed Cleavages
	High	ILTFDQLALDSPK	1	2	1	395132436		0	2.76737e+07	0	1.326e-07	73.39	1.66535e-06	2	1460.8	1.26499	63.4529	0
	High	TAVVVGTITDDVR	1	2	1	395132436		0	4.5018e+07	0	1.855e-12	60.97	3.62725e-05	2	1345.73	1.16735	46.7129	0
	High	TNSTFNQVVLK	1	2	1	395132436		0	1.83278e+07	0	0.001838	38.27	0.00577872	2	1250.68	1.87565	41.4697	0
	High	GcGTVLLSGPR	1	2	1	395132436	C2(Carbamidomethyl)	0	2.16403e+07	0	0.0002504	31.43	0.0307205	2	1116.58	1.30304	36.8858	0
	High	TNRPPLSLSR	2	2	1	395132436		0	1.67937e+07	0	0.0004496	24.08	0.0832491	3	1140.65	2.73758	28.9421	0
14165435	heterogeneous nuclear ribonucleoprotein K isoform b [Homo sapiens]	115.777	26.35	2	8	8	9	8.2052e+06	463	50.9444	5.5415
	A4	Sequence	# PSMs	# Proteins	# Protein Groups	Protein Group Accessions	Modifications	ΔCn	Area	q-Value	PEP	IonScore	Exp Value	Charge	MH+ [Da]	ΔM [ppm]	RT [min]	# Missed Cleavages
	High	GSYGDLGGPIITTQVTIPK	1	2	1	14165435		0	3.08155e+06	0	1.083e-14	63.95	1.32091e-05	2	1917.03	0.526738	61.0999	0
	High	TDYNASVSVPDSSGPER	2	2	1	14165435		0	1.61497e+07	0	1.481e-06	43.76	0.00140943	2	1780.8	-1.83496	34.2287	0
	High	IITITGTQDQIQNAQYLLQNSVK	1	2	1	14165435		0	0	0	3.106e-13	29.52	0.0291501	3	2589.39	1.4137	66.2517	0
	High	RPAEDMEEEQAFKR	1	2	1	14165435		0	1.71753e+06	0	0.0002504	26.73	0.0986247	3	1735.81	0.918611	27.0105	1
	High	VVLIGGKPDR	1	2	1	14165435		0	4.52651e+06	0.001	0.001838	33.2	0.003494	2	1053.64	0.76903	26.7358	0
	High	GGDLMAYDR	1	2	1	14165435		0	2.06691e+06	0.002	0.002274	22.52	0.113351	2	997.443	1.92922	32.8509	0
	High	mETEQPEETFPNTETNGEFGK	1	2	1	14165435	N-Term(Acetyl)	0	3.93933e+06	0.002	0.01019	15.82	0.553746	3	2457.04	1.23995	54.3162	0
	Medium	DLAGSIIGK	1	2	1	14165435		0	2.0504e+06	0.02	0.2156	16.3	1.35262	2	873.502	-1.79999	43.1191	0
212549553	interleukin enhancer-binding factor 3 isoform d [Homo sapiens]	115.369	21.83	7	16	16	16	9.52988e+06	898	95.7483	8.80713
	A4	Sequence	# PSMs	# Proteins	# Protein Groups	Protein Group Accessions	Modifications	ΔCn	Area	q-Value	PEP	IonScore	Exp Value	Charge	MH+ [Da]	ΔM [ppm]	RT [min]	# Missed Cleavages
	High	FVMEVEVDGQK	1	7	1	212549553		0	4.02629e+06	0	0.0002504	49.02	0.000541984	2	1280.62	1.42742	46.4488	0
	High	EATDAIGHLDR	1	5	1	212549553		0	5.65403e+06	0	0.0002504	47	0.00078314	2	1197.59	1.70086	27.8416	0
	High	YELISETGGSHDK	1	7	1	212549553		0	4.73359e+06	0	1.326e-09	42.77	0.00202659	2	1435.67	1.24627	29.9049	0
	High	VLQDMGLPTGAEGR	1	5	1	212549553		0	1.05698e+07	0	7.886e-09	41.01	0.00383571	2	1443.73	1.51537	44.8016	0
	High	LFPDTPLALDANK	1	5	1	212549553		0	8.62672e+06	0	6.386e-05	37.06	0.00796994	2	1414.76	1.04016	59.9125	0
	High	AYAALAALEK	1	5	1	212549553		0	3.19003e+06	0	0.0002504	33.06	0.0158921	2	1020.57	0.383353	49.2069	0
	High	NADHSMNYQYR	1	2	1	212549553		0	1.5102e+06	0	0.0009721	31.84	0.0105396	2	1398.59	0.397451	21.5501	0
	High	SIGTANRPMGAGEALR	1	5	1	212549553		0	1.72419e+06	0	0.0001689	27.41	0.075707	2	1600.82	-0.422506	31.7704	0
	High	VLAGETLSVNDPPDVLDR	1	5	1	212549553		0	9.39309e+06	0	0.0002504	20.63	0.39702	2	1909.99	0.942215	57.5573	0
	High	VLEcLASGIVMPDGSGIYDPcEK	1	5	1	212549553	C4(Carbamidomethyl); C21(Carbamidomethyl)	0	1.01804e+06	0	0.0004848	13.39	2.23344	3	2510.16	-1.14292	64.0666	0
	High	EDITQSAQHALR	1	5	1	212549553		0	3.22776e+06	0.002	0.001838	24.72	0.143516	2	1368.67	-13.0949	32.3442	0
	High	GWPLELLcEK	1	7	1	212549553	C8(Carbamidomethyl)	0	1.33893e+06	0.002	0.002381	18.57	0.609494	2	1244.63	-0.186744	66.9196	0
	High	FNYSGSGGR	1	2	1	212549553		0	1.67378e+06	0.002	0.01381	17.41	0.340409	2	944.423	0.650933	18.7472	0
	High	VLGMDPLPSK	1	5	1	212549553		0	5494065	0.003	0.03003	21.21	0.24143	2	1056.57	-3.47364	46.0845	0
	Medium	QQGPILTK	1	2	1	212549553		0	1.50933e+06	0.012	0.1215	22.45	0.0867501	2	884.52	0.45453	20.7683	0
	Medium	IFVNDDR	1	5	1	212549553		0	2.56986e+06	0.027	0.2419	24.84	0.134847	2	878.436	-0.426217	24.7786	0
431822408	heat shock protein HSP 90-beta isoform c [Homo sapiens]	114.146	12.89	3	4	8	10	1.03064e+07	714	82.2687	5.05908
	A4	Sequence	# PSMs	# Proteins	# Protein Groups	Protein Group Accessions	Modifications	ΔCn	Area	q-Value	PEP	IonScore	Exp Value	Charge	MH+ [Da]	ΔM [ppm]	RT [min]	# Missed Cleavages
	High	NPDDITQEEYGEFYK	1	3	1	431822408		0	6.18882e+06	0	1.799e-09	59.57	2.83196e-05	2	1847.8	1.30684	49.3548	0
	High	SLTNDWEDHLAVK	1	5	2	431822408;154146191		0	3.42466e+06	0	6.596e-10	53.06	0.000211318	2	1527.75	1.17282	50.808	0
	High	ADLINNLGTIAK	1	4	2	431822408;154146191		0	1.36859e+07	0	5.206e-09	43.89	0.00128621	2	1242.71	2.12604	54.9769	0
	High	SIYYITGESK	2	3	1	431822408		0	5.41238e+06	0	0.0002504	21.45	0.312239	2	1160.58	-0.613571	38.5126	0
	High	LGIHEDSTNR	1	3	1	431822408		0	1.5528e+06	0	0.0008441	20	0.3255	2	1141.56	-1.7577	16.9213	0
	High	YIDQEELNK	1	5	2	431822408;154146191		0	8.67989e+06	0.001	0.001838	24.2	0.154737	2	1151.56	1.04062	26.7336	0
	High	TLTLVDTGIGMTK	1	4	2	431822408;154146191		0	0	0.002	0.001838	39.68	0.00275575	2	1349.76	15.7314	55.3731	0
	High	TLTLVDTGIGmTK	1	4	2	431822408;154146191	M11(Oxidation)	0	672918	0.002	0.006337	14.94	1.23762	2	1365.73	1.4839	49.1409	0
	High	IDIIPNPQER	1	2	1	431822408		0	8.55333e+06	0.003	0.01915	17.28	0.635097	2	1194.65	1.41494	45.3491	0
336176066	RNA-binding protein 39 isoform d [Homo sapiens]	113.613	14.14	4	5	5	5	3.80482e+06	502	56.332	10.0376
	A4	Sequence	# PSMs	# Proteins	# Protein Groups	Protein Group Accessions	Modifications	ΔCn	Area	q-Value	PEP	IonScore	Exp Value	Charge	MH+ [Da]	ΔM [ppm]	RT [min]	# Missed Cleavages
	High	VLGVPIIVQASQAEK	1	4	1	336176066		0	5.31486e+06	0	7.135e-14	57.43	1.93368e-05	2	1551.91	1.66391	60.8273	0
	High	TDASSASSFLDSDELER	1	4	1	336176066		0	3.65031e+06	0	3.273e-14	54.01	0.000128293	2	1829.81	1.46503	52.5165	0
	High	IESIQLMMDSETGR	1	4	1	336176066		0	1.07822e+06	0	4.132e-09	42.16	0.00281567	2	1609.76	1.69302	58.3957	0
	High	DLEEFFSTVGK	1	4	1	336176066		0	2.44928e+06	0	0.0002504	38.43	0.00468687	2	1271.62	1.86703	65.717	0
	High	GYGFITFSDSEcAK	1	4	1	336176066	C12(Carbamidomethyl)	0	1.9388e+06	0	0.0002504	16.33	0.56689	2	1581.69	1.44559	57.5977	0
205277463	transketolase isoform 1 [Homo sapiens]	113.471	18.46	2	8	8	11	7.11894e+06	623	67.8347	7.66455
	A4	Sequence	# PSMs	# Proteins	# Protein Groups	Protein Group Accessions	Modifications	ΔCn	Area	q-Value	PEP	IonScore	Exp Value	Charge	MH+ [Da]	ΔM [ppm]	RT [min]	# Missed Cleavages
	High	ILATPPQEDAPSVDIANIR	2	2	1	205277463		0	6.25071e+06	0	4.206e-16	67.14	7.78583e-06	2	2020.08	2.37712	57.5003	0
	High	SVPTSTVFYPSDGVATEK	2	2	1	205277463		0	9703499	0	9.675e-11	41.66	0.00340146	2	1884.92	-2.31353	48.3509	0
	High	AVELAANTK	2	2	1	205277463		0	1.82553e+06	0	0.0002504	41.23	0.00385718	2	916.511	0.735775	19.6617	0
	High	DAIAQAVR	1	2	1	205277463		0	1.37031e+06	0	0.0007667	31.4	0.0241237	2	843.468	-0.0379178	23.2903	0
	High	TSRPENAIIYNNNEDFQVGQAK	1	2	1	205277463		0	5.40261e+06	0	1.393e-07	20.74	0.458774	3	2508.22	1.7555	44.9476	0
	High	LGQSDPAPLQHQMDIYQK	1	2	1	205277463		0	2.90337e+06	0.003	0.02957	15.91	1.49766	3	2069.02	2.11808	43.8896	0
	High	HQPTAIIAK	1	2	1	205277463		0	2.43575e+06	0.008	0.07096	14.83	0.545894	2	978.574	1.03516	18.7335	0
	High	VLDPFTIKPLDR	1	2	1	205277463		0	743718	0.008	0.08202	10.3	2.0205	2	1413.81	-0.341905	60.4807	0
306482646	serine/arginine-rich splicing factor 2 [Homo sapiens]	110.679	25.34	2	5	5	5	5.50701e+06	221	25.4612	11.854
	A4	Sequence	# PSMs	# Proteins	# Protein Groups	Protein Group Accessions	Modifications	ΔCn	Area	q-Value	PEP	IonScore	Exp Value	Charge	MH+ [Da]	ΔM [ppm]	RT [min]	# Missed Cleavages
	High	DAEDAMDAMDGAVLDGR	1	1	1	306482646		0	4.5116e+06	0	4.206e-16	72.27	1.30444e-06	2	1751.72	1.12508	58.3933	0
	High	VGDVYIPR	1	2	1	306482646		0	5.06375e+06	0	0.0002504	49.21	0.000576359	2	918.505	0.39848	37.5102	0
	High	sYGRPPPDVEGMTSLK	1	1	1	306482646	N-Term(Acetyl)	0	6.94568e+06	0	0.0002504	40.04	0.0051771	2	1775.87	2.80845	50.1519	0
	Medium	VDNLTYR	1	2	1	306482646		0	2.21801e+06	0.011	0.1133	24.24	0.132976	2	880.453	0.192983	23.5995	0
	Medium	YGGGGYGR	1	1	1	306482646		0	476636	0.017	0.1485	17.66	0.215959	2	786.353	0.00199934	12.8501	0
4504301	histone H4 [Homo sapiens]	110.082	43.69	1	5	5	10	1.32511e+08	103	11.3604	11.356
	A4	Sequence	# PSMs	# Proteins	# Protein Groups	Protein Group Accessions	Modifications	ΔCn	Area	q-Value	PEP	IonScore	Exp Value	Charge	MH+ [Da]	ΔM [ppm]	RT [min]	# Missed Cleavages
	High	ISGLIYEETR	3	1	1	4504301		0	2.02857e+08	0	3.503e-06	56.66	9.64512e-05	2	1180.62	-0.288241	42.5935	0
	High	KTVTAMDVVYALK	1	1	1	4504301		0	1.53601e+06	0	2.331e-07	50.13	0.000271258	2	1438.8	-0.897363	59.7	1
	High	DNIQGITKPAIR	1	1	1	4504301		0	1.22653e+08	0	1.363e-06	40.5	0.00184935	2	1325.75	0.604056	33.778	0
	High	DAVTYTEHAK	3	1	1	4504301		0	7.20235e+07	0	0.0002504	36.57	0.00900997	2	1134.54	-0.288551	16.6093	0
	High	TVTAmDVVYALK	2	1	1	4504301	M5(Oxidation)	0	6.66507e+06	0.001	0.001838	24.62	0.128221	2	1326.7	0.0987899	56.6182	0
4826998	splicing factor, proline- and glutamine-rich [Homo sapiens]	107.692	12.02	1	7	7	8	1.67117e+07	707	76.1016	9.43701
	A4	Sequence	# PSMs	# Proteins	# Protein Groups	Protein Group Accessions	Modifications	ΔCn	Area	q-Value	PEP	IonScore	Exp Value	Charge	MH+ [Da]	ΔM [ppm]	RT [min]	# Missed Cleavages
	High	MGGGGAMNMGDPYGSGGQK	1	1	1	4826998		0	3033062	0	8.242e-11	56.79	3.71705e-05	2	1771.72	-0.894077	35.913	0
	High	FGQGGAGPVGGQGPR	1	1	1	4826998		0	3.52087e+07	0	5.69e-14	56.03	0.000100906	2	1341.67	0.386187	25.8665	0
	High	GMGPGTPAGYGR	1	1	1	4826998		0	9.13902e+06	0	0.0002504	33.46	0.0165675	2	1120.52	1.92705	26.6302	0
	High	ANLSLLR	1	1	1	4826998		0	1.59704e+06	0.001	0.001838	45.82	0.00111404	2	786.484	1.10126	41.0283	0
	High	FATHAAALSVR	1	1	1	4826998		0	1.11964e+06	0.001	0.001838	24.14	0.168454	3	1143.63	0.440929	31.0721	0
	High	GmGPGTPAGYGR	1	1	1	4826998	M2(Oxidation)	0	965448	0.002	0.00328	13.82	1.25731	2	1136.52	0.0370942	19.4225	0
	High	SPPPGMGLNQNR	1	1	1	4826998		0	5.78728e+06	0.006	0.05365	10.66	3.71523	2	1267.62	1.64664	26.9892	0
	High	AELDDTPMR	1	1	1	4826998		0	2.04713e+06	0.009	0.09819	13.55	0.916259	2	1047.48	1.26793	28.6411	0
320461711	peroxiredoxin-1 [Homo sapiens]	107.341	35.68	2	7	7	11	2.0674e+07	199	22.0963	8.1333
	A4	Sequence	# PSMs	# Proteins	# Protein Groups	Protein Group Accessions	Modifications	ΔCn	Area	q-Value	PEP	IonScore	Exp Value	Charge	MH+ [Da]	ΔM [ppm]	RT [min]	# Missed Cleavages
	High	QGGLGPMNIPLVSDPK	1	1	1	320461711		0	9.14036e+06	0	3.643e-13	60.1	4.14837e-05	2	1622.86	-0.556136	61.6186	0
	High	LVQAFQFTDK	2	1	1	320461711		0	2.03828e+07	0	0.0002504	45.03	0.000992401	2	1196.63	2.6337	50.2643	0
	High	TIAQDYGVLK	2	1	1	320461711		0	2.72365e+07	0.001	0.001838	14.54	1.07402	1	1107.6	-1.43194	41.9612	0
	High	DISLSDYK	1	1	1	320461711		0	2.80721e+06	0.002	0.001846	43.85	0.00108176	1	940.462	-0.726705	38.1163	0
	High	GLFIIDDK	1	2	1	320461711		0	4.83097e+06	0.002	0.001838	29.44	0.0405564	2	920.509	0.491692	55.378	0
	High	ADEGISFR	1	1	1	320461711		0	5.04823e+06	0.002	0.001852	18.39	0.557777	2	894.433	1.09841	33.0081	0
	High	ATAVMPDGQFK	1	1	1	320461711		0	1.44026e+07	0.003	0.02352	28.24	0.0693604	2	1164.57	0.090774	35.8571	0
	High	ATAVmPDGQFK	2	1	1	320461711	M5(Oxidation)	0	1.21098e+06	0.008	0.09025	12.82	2.03996	2	1180.56	-1.91059	26.1167	0
66933005	calnexin precursor [Homo sapiens]	107.309	9.46	1	5	5	6	6.0625e+06	592	67.5259	4.60205
	A4	Sequence	# PSMs	# Proteins	# Protein Groups	Protein Group Accessions	Modifications	ΔCn	Area	q-Value	PEP	IonScore	Exp Value	Charge	MH+ [Da]	ΔM [ppm]	RT [min]	# Missed Cleavages
	High	IVDDWANDGWGLK	1	1	1	66933005		0	5.85322e+06	0	1.541e-08	56.77	7.98384e-05	2	1488.71	-0.253857	60.9584	0
	High	IPDPEAVKPDDWDEDAPAK	2	1	1	66933005		0	9.76531e+06	0	1.986e-09	56.41	0.00010628	3	2107.98	0.746382	46.7175	0
	High	TPELNLDQFHDK	1	1	1	66933005		0	2.56898e+06	0	0.0004301	30.43	0.0355953	2	1456.71	5.09203	45.5567	0
	High	YDGKWEVEEMK	1	1	1	66933005		0	1.65703e+06	0.002	0.007093	25.38	0.080691	2	1413.63	-0.701891	39.8395	1
	High	IVDDWANDGWGLKK	1	1	1	66933005		0	0	0.004	0.03595	17.1	0.933001	2	1616.81	1.95621	53.8022	1
345197228	transformer-2 protein homolog beta isoform 2 [Homo sapiens]	106.793	19.68	2	3	3	3	3.96534e+06	188	21.9217	10.1548
	A4	Sequence	# PSMs	# Proteins	# Protein Groups	Protein Group Accessions	Modifications	ΔCn	Area	q-Value	PEP	IonScore	Exp Value	Charge	MH+ [Da]	ΔM [ppm]	RT [min]	# Missed Cleavages
	High	YGPIADVSIVYDQQSR	1	2	1	345197228		0	7.26669e+06	0	5.88e-16	72.03	3.108e-06	2	1810.9	2.33664	57.5786	0
	High	GFAFVYFENVDDAK	1	2	1	345197228		0	3.3696e+06	0	7.649e-14	62.34	2.40088e-05	2	1621.75	0.810832	65.9701	0
	High	VDFSITK	1	2	1	345197228		0	1.25974e+06	0.005	0.04168	11.95	1.78076	2	809.442	1.92828	37.2614	0
4758138	probable ATP-dependent RNA helicase DDX5 [Homo sapiens]	106.707	15.96	1	5	9	9	1.21218e+07	614	69.1047	8.92432
	A4	Sequence	# PSMs	# Proteins	# Protein Groups	Protein Group Accessions	Modifications	ΔCn	Area	q-Value	PEP	IonScore	Exp Value	Charge	MH+ [Da]	ΔM [ppm]	RT [min]	# Missed Cleavages
	High	ELAQQVQQVAAEYcR	1	1	1	4758138	C14(Carbamidomethyl)	0	1.5415e+06	0	3.283e-15	55.29	0.000151302	2	1792.87	0.582841	55.8016	0
	High	TTYLVLDEADR	1	1	1	4758138		0	6.41331e+06	0	5.261e-06	41.08	0.0031934	2	1295.65	-1.84307	48.3081	0
	High	LLQLVEDR	1	1	1	4758138		0	0	0	0.0002504	34.96	0.0100374	2	985.568	0.571856	44.3263	0
	High	STcIYGGAPK	1	3	2	4758138;38201710	C3(Carbamidomethyl)	0	3.78704e+06	0	0.000619	34.66	0.0123284	2	1053.5	-0.0491719	24.522	0
	High	APILIATDVASR	1	3	2	4758138;38201710		0	2.6165e+07	0	5.948e-05	33.55	0.00858855	2	1226.71	-1.29898	48.7082	0
	High	GVEIcIATPGR	1	3	2	4758138;38201710	C5(Carbamidomethyl)	0	2.22755e+06	0	0.0002504	25.71	0.100432	2	1172.61	1.3663	44.2944	0
	High	NFYQEHPDLAR	1	1	1	4758138		0	2.23297e+06	0.001	0.001838	46.8	0.000785575	2	1389.65	-1.78756	34.1512	0
	High	mLDMGFEPQIR	1	7	3	4758138;301171475;38201710	M1(Oxidation)	0	607744	0.001	0.001838	14.27	1.72278	2	1352.64	1.64688	54.8631	0
	High	LMEEIMSEK	1	1	1	4758138		0	1.07943e+06	0.005	0.04353	16.29	0.856441	2	1109.52	0.325388	40.8981	0
18379334	RNA-binding protein with serine-rich domain 1 [Homo sapiens]	105.586	4.92	1	1	1	2	1.82865e+07	305	34.1877	11.8394
	A4	Sequence	# PSMs	# Proteins	# Protein Groups	Protein Group Accessions	Modifications	ΔCn	Area	q-Value	PEP	IonScore	Exp Value	Charge	MH+ [Da]	ΔM [ppm]	RT [min]	# Missed Cleavages
	High	GYAYVEFENPDEAEK	2	1	1	18379334		0	1.82865e+07	0	4.206e-16	73.93	9.12319e-07	2	1760.76	-2.0043	48.8435	0
38201710	probable ATP-dependent RNA helicase DDX17 isoform 1 [Homo sapiens]	105.411	11.66	2	3	7	7	1.09325e+07	729	80.222	8.26514
	A4	Sequence	# PSMs	# Proteins	# Protein Groups	Protein Group Accessions	Modifications	ΔCn	Area	q-Value	PEP	IonScore	Exp Value	Charge	MH+ [Da]	ΔM [ppm]	RT [min]	# Missed Cleavages
	High	VLEEANQAINPK	1	2	1	38201710		0	2.84557e+06	0	0.0002504	49.12	0.000414533	2	1325.71	1.62644	30.1812	0
	High	SSQSSSQQFSGIGR	1	2	1	38201710		0	2.28716e+06	0	4.881e-09	47.12	0.00078897	2	1455.68	1.24912	28.2769	0
	High	ELAQQVQQVADDYGK	1	2	1	38201710		0	1.89516e+06	0	5.429e-07	40.95	0.00437118	2	1691.82	-1.46515	51.5957	0
	High	STcIYGGAPK	1	3	2	4758138;38201710	C3(Carbamidomethyl)	0	3.78704e+06	0	0.000619	34.66	0.0123284	2	1053.5	-0.0491719	24.522	0
	High	APILIATDVASR	1	3	2	4758138;38201710		0	2.6165e+07	0	5.948e-05	33.55	0.00858855	2	1226.71	-1.29898	48.7082	0
	High	GVEIcIATPGR	1	3	2	4758138;38201710	C5(Carbamidomethyl)	0	2.22755e+06	0	0.0002504	25.71	0.100432	2	1172.61	1.3663	44.2944	0
	High	mLDMGFEPQIR	1	7	3	4758138;301171475;38201710	M1(Oxidation)	0	607744	0.001	0.001838	14.27	1.72278	2	1352.64	1.64688	54.8631	0
34147513	ras-related protein Rab-7a [Homo sapiens]	103.799	31.4	1	5	5	5	4.64579e+06	207	23.4748	6.69775
	A4	Sequence	# PSMs	# Proteins	# Protein Groups	Protein Group Accessions	Modifications	ΔCn	Area	q-Value	PEP	IonScore	Exp Value	Charge	MH+ [Da]	ΔM [ppm]	RT [min]	# Missed Cleavages
	High	LVTMQIWDTAGQER	1	1	1	34147513		0	3.38344e+06	0	6.288e-06	69.29	6.38262e-06	2	1647.81	-0.614326	59.6703	0
	High	EAINVEQAFQTIAR	1	1	1	34147513		0	6.1528e+06	0	9.237e-10	60.21	4.46385e-05	2	1589.83	-0.292429	64.46	0
	High	VIILGDSGVGK	1	1	1	34147513		0	4401139	0.002	0.001838	27.95	0.0478569	2	1057.62	-1.11596	42.5982	0
	High	QETEVELYNEFPEPIK	1	1	1	34147513		0	932435	0.002	0.001838	12.29	3.02773	2	1964.95	0.526935	61.2764	0
	High	ATIGADFLTK	1	1	1	34147513		0	3.23877e+06	0.004	0.03924	22.8	0.179484	2	1036.57	1.09761	49.7424	0
5174735	tubulin beta-4B chain [Homo sapiens]	102.122	25.39	6	2	9	11	7.58674e+06	445	49.799	4.89404
	A4	Sequence	# PSMs	# Proteins	# Protein Groups	Protein Group Accessions	Modifications	ΔCn	Area	q-Value	PEP	IonScore	Exp Value	Charge	MH+ [Da]	ΔM [ppm]	RT [min]	# Missed Cleavages
	High	IMNTFSVVPSPK	1	5	2	5174735;29788785		0	4.24954e+06	0	2.18e-11	50.51	0.000436598	2	1319.7	1.35344	51.8409	0
	High	EVDEQMLNVQNK	2	4	2	29788785;5174735		0	1.25242e+07	0	0.0002504	46.39	0.000820873	2	1446.69	-1.02129	36.1356	0
	High	LAVNMVPFPR	1	10	2	29788785;5174735		0	3.35667e+06	0	6.424e-05	42.82	0.0020713	2	1143.64	1.01811	59.7726	0
	High	TAVcDIPPR	2	6	2	29788785;5174735	C4(Carbamidomethyl)	0	826461	0	0.001626	41.5	0.00202826	2	1028.52	3.0269	27.6934	0
	High	NSSYFVEWIPNNVK	1	8	2	29788785;5174735		0	3.66297e+06	0	2.304e-09	34.61	0.0187499	2	1696.83	0.24771	64.1411	0
	High	NMMAAcDPR	1	9	2	29788785;5174735	C6(Carbamidomethyl)	0	2.38845e+06	0	0.0002504	22.24	0.0477628	2	1065.43	0.603405	23.387	0
	High	EIVHLQAGQcGNQIGAK	1	6	2	5174735;29788785	C10(Carbamidomethyl)	0	0	0	0.0005873	18.1	0.800738	2	1822.92	-0.148267	34.191	0
	High	AVLVDLEPGTMDSVR	1	3	1	5174735		0	5.98648e+06	0.001	0.001838	20.12	0.444545	2	1601.82	-1.49239	58.6408	0
	High	ALTVPELTQQMFDAK	1	4	1	5174735		0	1.92093e+06	0.001	0.001838	10.39	5.2333	2	1691.87	0.496706	66.0252	0
222080086	zinc transporter 7 [Homo sapiens]	101.992	10.37	1	3	3	4	1.29175e+07	376	41.5993	6.94678
	A4	Sequence	# PSMs	# Proteins	# Protein Groups	Protein Group Accessions	Modifications	ΔCn	Area	q-Value	PEP	IonScore	Exp Value	Charge	MH+ [Da]	ΔM [ppm]	RT [min]	# Missed Cleavages
	High	TPPLLENSLPQcYQR	2	1	1	222080086	C12(Carbamidomethyl)	0	2.97614e+07	0	4.206e-16	92.9	2.39506e-08	2	1815.91	-0.159768	53.5096	0
	High	mLPLSIKDDEYKPPK	1	1	1	222080086	N-Term(Acetyl)	0	1.45208e+06	0	0.0002504	25.99	0.0991965	2	1815.95	-1.05458	58.629	1
	High	ESVGILMQR	1	1	1	222080086		0	7.53903e+06	0.002	0.002013	21.14	0.476476	2	1032.55	-1.29514	42.4972	0
11056044	inorganic pyrophosphatase [Homo sapiens]	101.2	18.69	1	3	4	6	1.83728e+06	289	32.6392	5.85889
	A4	Sequence	# PSMs	# Proteins	# Protein Groups	Protein Group Accessions	Modifications	ΔCn	Area	q-Value	PEP	IonScore	Exp Value	Charge	MH+ [Da]	ΔM [ppm]	RT [min]	# Missed Cleavages
	High	GIScMNTTLSESPFK	1	1	1	11056044	C4(Carbamidomethyl)	0	3.47945e+06	0	3.282e-12	101.2	3.02672e-09	2	1671.78	2.50106	54.7127	0
	High	VIAINVDDPDAANYNDINDVK	2	1	1	11056044		0	492345	0	4.592e-05	26.98	0.111348	3	2288.1	-0.951619	55.5411	0
	High	AAPFSLEYR	1	1	1	11056044		0	1345563	0.002	0.003805	14.51	1.3328	2	1053.54	2.09818	48.5274	0
	High	YVANLFPYK	1	3	2	11056044;77812678		0	686815	0.003	0.03165	13.61	1.61575	2	1114.59	-0.213704	55.4465	0
	High	GIScmNTTLSESPFK	1	1	1	11056044	C4(Carbamidomethyl); M5(Oxidation)	0	302865	0.003	0.01914	9.98	3.34035	2	1687.77	-0.0065997	45.3111	0
167614485	3-ketoacyl-CoA thiolase, mitochondrial [Homo sapiens]	100.434	14.86	1	3	3	3	2.86286e+06	397	41.8976	8.08936
	A4	Sequence	# PSMs	# Proteins	# Protein Groups	Protein Group Accessions	Modifications	ΔCn	Area	q-Value	PEP	IonScore	Exp Value	Charge	MH+ [Da]	ΔM [ppm]	RT [min]	# Missed Cleavages
	High	AANDAGYFNDEMAPIEVK	1	1	1	167614485		0	2.07318e+06	0	4.206e-16	63.13	1.74134e-05	2	1954.88	-0.708297	57.6657	0
	High	DGTVTAGNASGVADGAGAVIIASEDAVK	1	1	1	167614485		0	3.75894e+06	0	4.206e-16	50.8	0.000444162	3	2516.25	-0.0113478	62.8119	0
	High	DFTATDLSEFAAK	1	1	1	167614485		0	2.75645e+06	0	6.263e-08	39.62	0.00376547	2	1415.67	1.30868	58.34	0
68160922	40S ribosomal protein S14 [Homo sapiens]	100.43	27.81	1	3	3	4	1.02908e+07	151	16.2625	10.0522
	A4	Sequence	# PSMs	# Proteins	# Protein Groups	Protein Group Accessions	Modifications	ΔCn	Area	q-Value	PEP	IonScore	Exp Value	Charge	MH+ [Da]	ΔM [ppm]	RT [min]	# Missed Cleavages
	High	DESSPYAAMLAAQDVAQR	2	1	1	68160922		0	3.9159e+06	0	1.606e-10	66.6	1.00637e-05	2	1922.89	0.784529	58.7276	0
	High	TPGPGAQSALR	1	1	1	68160922		0	1.01494e+07	0	1.425e-08	51.72	0.000186078	2	1054.56	0.319898	22.1696	0
	High	IEDVTPIPSDSTR	1	1	1	68160922		0	1.68072e+07	0	0.0002504	32.25	0.0276387	2	1429.72	-0.864129	35.5051	0
224586817	Golgi apparatus protein 1 isoform 3 precursor [Homo sapiens]	99.18	5	3	6	6	6	1.8155e+06	1179	134.464	6.90283
	A4	Sequence	# PSMs	# Proteins	# Protein Groups	Protein Group Accessions	Modifications	ΔCn	Area	q-Value	PEP	IonScore	Exp Value	Charge	MH+ [Da]	ΔM [ppm]	RT [min]	# Missed Cleavages
	High	ALNEAcESVIQTAcK	1	3	1	224586817	C6(Carbamidomethyl); C14(Carbamidomethyl)	0	2.43576e+06	0	8.112e-14	99.18	5.25399e-09	2	1693.79	-0.624745	40.0934	0
	High	AKDDSELEGQVIScLK	1	3	1	224586817	C14(Carbamidomethyl)	0	0	0	6.558e-05	28.53	0.0707018	2	1791.88	1.93361	49.8041	1
	High	DDSELEGQVIScLK	1	3	1	224586817	C12(Carbamidomethyl)	0	443445	0.002	0.001838	17.59	0.708915	2	1592.75	-0.117651	56.2723	0
	High	QITQNTDYR	1	3	1	224586817		0	1.0352e+06	0.002	0.004351	11.02	3.0283	2	1138.55	0.645361	18.2724	0
	High	IIIQESALDYR	1	3	1	224586817		0	1.97553e+06	0.006	0.0498	22.11	0.249762	2	1320.72	1.86869	50.4215	0
	Medium	cNVENLPR	1	3	1	224586817	C1(Carbamidomethyl)	0	666870	0.021	0.2368	10.59	2.06021	2	1001.48	-2.69289	26.1237	0
73486658	aspartate aminotransferase, mitochondrial precursor [Homo sapiens]	98.1203	11.4	1	4	4	4	4.74778e+06	430	47.4873	9.01221
	A4	Sequence	# PSMs	# Proteins	# Protein Groups	Protein Group Accessions	Modifications	ΔCn	Area	q-Value	PEP	IonScore	Exp Value	Charge	MH+ [Da]	ΔM [ppm]	RT [min]	# Missed Cleavages
	High	TcGFDFTGAVEDISK	1	1	1	73486658	C2(Carbamidomethyl)	0	849095	0	6.675e-07	64.73	9.69153e-06	2	1646.74	-0.669202	62.036	0
	High	ASAELALGENSEVLK	1	1	1	73486658		0	8.33457e+06	0	8.214e-06	61.99	2.88064e-05	2	1530.8	2.32017	48.4422	0
	High	DAGMQLQGYR	1	1	1	73486658		0	3.37127e+06	0	0.000356	17.28	0.522856	2	1138.53	-1.58002	34.04	0
	High	VGAFTMVcK	1	1	1	73486658	C8(Carbamidomethyl)	0	2.5375e+06	0.002	0.001838	13.07	1.24526	2	1012.5	0.216102	40.8914	0
83376130	elongation factor 1-beta [Homo sapiens]	97.5843	12.44	1	2	2	2	6.26616e+06	225	24.7483	4.66553
	A4	Sequence	# PSMs	# Proteins	# Protein Groups	Protein Group Accessions	Modifications	ΔCn	Area	q-Value	PEP	IonScore	Exp Value	Charge	MH+ [Da]	ΔM [ppm]	RT [min]	# Missed Cleavages
	High	SPAGLQVLNDYLADK	1	1	1	83376130		0	2.95846e+06	0	4.206e-16	75.17	1.55997e-06	2	1603.83	0.68993	64.1366	0
	High	SIQADGLVWGSSK	1	1	1	83376130		0	9.57385e+06	0	0.0002504	52.47	0.00028312	2	1347.69	2.2525	50.1381	0
4507645	triosephosphate isomerase isoform 1 [Homo sapiens]	96.9756	37.35	3	7	7	11	6.17132e+06	249	26.6527	6.90283
	A4	Sequence	# PSMs	# Proteins	# Protein Groups	Protein Group Accessions	Modifications	ΔCn	Area	q-Value	PEP	IonScore	Exp Value	Charge	MH+ [Da]	ΔM [ppm]	RT [min]	# Missed Cleavages
	High	IAVAAQNcYK	1	2	1	4507645	C8(Carbamidomethyl)	0	7.46672e+06	0	0.0002504	47	0.000924804	2	1137.57	-0.710847	24.8988	0
	High	VTNGAFTGEISPGMIK	1	2	1	4507645		0	3.23838e+06	0	4.493e-05	44.6	0.00179956	2	1621.82	-0.541822	53.6836	0
	High	DcGATWVVLGHSER	3	3	1	4507645	C2(Carbamidomethyl)	0	2.47021e+06	0	1.415e-09	40.4	0.0035158	2	1586.74	1.92922	47.5114	0
	High	VPADTEVVcAPPTAYIDFAR	2	2	1	4507645	C9(Carbamidomethyl)	0	6594119	0	8.122e-09	35.86	0.0133341	2	2192.07	1.02437	62.9371	0
	High	TATPQQAQEVHEK	2	3	1	4507645		0	4.45314e+06	0	0.0002504	30.55	0.0438762	2	1466.72	-1.84123	13.561	0
	High	HVFGESDELIGQK	1	3	1	4507645		0	2.49451e+06	0	0.0002504	25.37	0.117468	2	1458.72	-0.0436424	39.297	0
	Medium	VVFEQTK	1	3	1	4507645		0	1.13999e+06	0.029	0.2419	17.94	0.519845	1	850.468	1.49258	21.7566	0
71361682	nuclear mitotic apparatus protein 1 [Homo sapiens]	96.9314	6	1	9	9	9	1.66903e+06	2115	238.115	5.78271
	A4	Sequence	# PSMs	# Proteins	# Protein Groups	Protein Group Accessions	Modifications	ΔCn	Area	q-Value	PEP	IonScore	Exp Value	Charge	MH+ [Da]	ΔM [ppm]	RT [min]	# Missed Cleavages
	High	LEILQQQLQVANEAR	1	1	1	71361682		0	406750	0	2.402e-06	52.01	0.00015895	2	1752.96	1.33647	56.9097	0
	High	DSALETLQGQLEEK	1	1	1	71361682		0	1.90913e+06	0	1.271e-08	49.2	0.000583699	2	1560.78	0.289	57.4108	0
	High	ASMQPIQIAEGTGITTR	1	1	1	71361682		0	1.348e+06	0	3.592e-12	35.91	0.0116043	2	1773.92	-0.08114	54.2032	0
	High	YVQELAAVR	1	1	1	71361682		0	562848	0	0.001514	29.9	0.03822	2	1048.58	0.978602	35.834	0
	High	TQPDGTSVPGEPASPISQR	1	1	1	71361682		0	0	0	2.755e-07	25.76	0.144012	2	1923.94	-1.79208	36.0169	0
	High	LLQAETASNSAR	1	1	1	71361682		0	1.74997e+06	0	0.001838	17.22	1.14371	2	1260.66	0.6073	21.9659	0
	High	AALMESQGQQQEER	1	1	1	71361682		0	184559	0.001	0.001838	14.14	1.38772	2	1604.73	0.414454	22.0107	0
	High	VESLESLYFTPIPAR	1	1	1	71361682		0	393077	0.002	0.001838	21.35	0.291664	2	1721.92	2.90946	65.2425	0
	High	QSMAFSILNTPK	1	1	1	71361682		0	780112	0.008	0.07298	13.89	1.89869	2	1336.69	0.752622	58.7957	0
31621305	leucine-rich PPR motif-containing protein, mitochondrial precursor [Homo sapiens]	96.5445	7.39	1	8	8	8	2.03647e+06	1394	157.805	6.12549
	A4	Sequence	# PSMs	# Proteins	# Protein Groups	Protein Group Accessions	Modifications	ΔCn	Area	q-Value	PEP	IonScore	Exp Value	Charge	MH+ [Da]	ΔM [ppm]	RT [min]	# Missed Cleavages
	High	AGDMENAENILTVMR	1	1	1	31621305		0	1.04818e+06	0	3.294e-12	71.69	3.16459e-06	2	1663.78	2.68961	62.2788	0
	High	TVLDQQQTPSR	1	1	1	31621305		0	2.93627e+06	0	0.0002504	42.12	0.00261463	2	1272.66	1.76044	21.1444	0
	High	LIASYcNVGDIEGASK	1	1	1	31621305	C6(Carbamidomethyl)	0	1.74252e+06	0	1.802e-06	35.36	0.0150775	2	1696.82	-0.600737	46.3967	0
	High	TVQLTSSELESTLETLK	1	1	1	31621305		0	301852	0	0.0002504	33.22	0.0174136	2	1879	2.63533	65.7888	0
	High	VIEEQLEPAVEK	1	1	1	31621305		0	1.43063e+06	0	0.0002504	30.42	0.0302304	2	1383.74	0.58758	37.9694	0
	High	GDVENIEVVQK	1	1	1	31621305		0	877693	0.002	0.003498	13.5	1.89171	2	1229.64	1.97191	33.401	0
	High	ScGSLLPELK	1	1	1	31621305	C2(Carbamidomethyl)	0	582635	0.005	0.04623	13.82	2.04572	2	1103.57	-2.64532	51.3834	0
	High	DIQEESTFSSR	1	1	1	31621305		0	301985	0.007	0.06598	12.26	1.97602	2	1298.59	1.81207	29.5916	0
4502285	sarcoplasmic/endoplasmic reticulum calcium ATPase 2 isoform a [Homo sapiens]	95.76	7.42	10	5	5	5	1.24942e+06	997	109.62	5.36377
	A4	Sequence	# PSMs	# Proteins	# Protein Groups	Protein Group Accessions	Modifications	ΔCn	Area	q-Value	PEP	IonScore	Exp Value	Charge	MH+ [Da]	ΔM [ppm]	RT [min]	# Missed Cleavages
	High	VGEATETALTcLVEK	1	8	1	4502285	C11(Carbamidomethyl)	0	2.47022e+06	0	8.122e-11	62.58	3.12476e-05	2	1620.81	-0.681712	56.2476	0
	High	SLPSVETLGcTSVIcSDK	1	10	1	4502285	C10(Carbamidomethyl); C15(Carbamidomethyl)	0	687915	0	5.856e-05	33.66	0.0214618	2	1952.93	-0.235575	56.4871	0
	High	IGIFGQDEDVTSK	1	2	1	4502285		0	0	0	0.0002504	32.55	0.0277674	2	1408.69	-4.18723	48.7128	0
	High	AEIGIAMGSGTAVAK	1	10	1	4502285		0	563736	0	0.0002509	11.97	3.6055	2	1375.72	-2.16454	43.1021	0
	High	TGTLTTNQMSVcR	1	8	1	4502285	C12(Carbamidomethyl)	0	590134	0.001	0.001838	22.47	0.241784	2	1468.69	0.377937	31.4055	0
4503471	elongation factor 1-alpha 1 [Homo sapiens]	95.2439	26.19	2	9	9	11	3.09642e+07	462	50.1091	9.01221
	A4	Sequence	# PSMs	# Proteins	# Protein Groups	Protein Group Accessions	Modifications	ΔCn	Area	q-Value	PEP	IonScore	Exp Value	Charge	MH+ [Da]	ΔM [ppm]	RT [min]	# Missed Cleavages
	High	IGGIGTVPVGR	1	2	1	4503471		0	4.99717e+07	0	2.386e-10	65.53	2.93893e-06	2	1025.61	0.719779	39.1434	0
	High	STTTGHLIYK	1	2	1	4503471		0	2.0855e+07	0	0.0003279	33.73	0.0178142	2	1120.6	1.46766	23.5034	0
	High	LPLQDVYK	2	2	1	4503471		0	1.24419e+07	0	0.0002504	32.53	0.0213894	2	975.55	-0.604477	42.8626	0
	High	EHALLAYTLGVK	1	2	1	4503471		0	4.87082e+06	0	0.0002504	30.73	0.0295848	2	1314.74	-0.12065	53.5198	0
	High	VETGVLKPGMVVTFAPVNVTTEVK	1	1	1	4503471		0	4.82582e+06	0	5.195e-12	30.52	0.0142832	3	2515.38	-0.474114	63.7665	0
	High	SGDAAIVDMVPGKPMcVESFSDYPPLGR	1	1	1	4503471	C16(Carbamidomethyl)	0	4.34814e+06	0	1.085e-07	21.69	0.326962	3	2995.4	-1.03845	65.1848	0
	High	YYVTIIDAPGHR	1	1	1	4503471		0	2.89372e+06	0	0.0002504	21.4	0.371273	2	1404.73	1.24299	45.5245	0
	High	QTVAVGVIK	2	2	1	4503471		0	2.20659e+07	0.001	0.001838	23.3	0.116232	1	914.568	0.561569	33.6809	0
	High	EVSTYIK	1	1	1	4503471		0	4.53255e+06	0.005	0.04352	14.33	0.876322	1	839.451	-0.149653	25.3309	0
14141159	heterogeneous nuclear ribonucleoprotein H3 isoform b [Homo sapiens]	94.967	22.96	2	5	5	7	4.51975e+06	331	35.2164	6.87354
	A4	Sequence	# PSMs	# Proteins	# Protein Groups	Protein Group Accessions	Modifications	ΔCn	Area	q-Value	PEP	IonScore	Exp Value	Charge	MH+ [Da]	ΔM [ppm]	RT [min]	# Missed Cleavages
	High	STGEAFVQFASK	2	2	1	14141159		0	7489514	0	0.000108	52.56	0.000198556	2	1271.63	1.67539	47.1254	0
	High	ATENDIANFFSPLNPIR	1	2	1	14141159		0	580995	0	0.0002504	34.96	0.0158619	2	1918.97	0.968055	69.5595	0
	High	HNGPNDASDGTVR	1	2	1	14141159		0	1.66496e+06	0	0.001788	27.69	0.0457881	2	1339.6	-2.30272	9.81534	0
	High	DGMDNQGGYGSVGR	2	2	1	14141159		0	4.40476e+06	0	0.0003976	27.66	0.0230527	2	1412.59	-0.522887	24.7014	0
	High	GGGGSGGYYGQGGMSGGGWR	1	2	1	14141159		0	660809	0	0.0002504	22.15	0.115507	2	1804.75	1.2584	39.4523	0
4505621	phosphatidylethanolamine-binding protein 1 preproprotein [Homo sapiens]	93.3814	32.09	1	4	4	4	5.12688e+06	187	21.0437	7.53271
	A4	Sequence	# PSMs	# Proteins	# Protein Groups	Protein Group Accessions	Modifications	ΔCn	Area	q-Value	PEP	IonScore	Exp Value	Charge	MH+ [Da]	ΔM [ppm]	RT [min]	# Missed Cleavages
	High	GNDISSGTVLSDYVGSGPPK	1	1	1	4505621		0	5.60829e+06	0	1.327e-10	59.67	5.85868e-05	2	1949.95	1.60439	54.0701	0
	High	APVAGTcYQAEWDDYVPK	1	1	1	4505621	C7(Carbamidomethyl)	0	2.93575e+06	0	4.206e-16	55.5	0.00010738	2	2069.93	-0.402927	58.9005	0
	High	LYTLVLTDPDAPSR	1	1	1	4505621		0	6.83659e+06	0	3.961e-11	32.33	0.0241811	2	1560.83	-0.176583	57.8206	0
	High	LYEQLSGK	1	1	1	4505621		0	602267	0.003	0.027	15.19	1.03974	1	937.499	0.402478	25.8901	0
55769543	39S ribosomal protein L14, mitochondrial [Homo sapiens]	92.5379	29.66	1	3	3	3	1.84593e+06	145	15.9374	10.2427
	A4	Sequence	# PSMs	# Proteins	# Protein Groups	Protein Group Accessions	Modifications	ΔCn	Area	q-Value	PEP	IonScore	Exp Value	Charge	MH+ [Da]	ΔM [ppm]	RT [min]	# Missed Cleavages
	High	FDSNNVVLIEDNGNPVGTR	1	1	1	55769543		0	1.81678e+06	0	4.206e-16	76.84	1.11167e-06	2	2060.01	1.19526	52.3765	0
	High	VGDQILLAIK	1	1	1	55769543		0	2.06353e+06	0	1.262e-07	37.45	0.001601	2	1069.66	-2.01922	57.9464	0
	Medium	VVDNSALGNSPYHR	1	1	1	55769543		0	1.65747e+06	0.012	0.1211	9.72	4.85301	3	1528.75	0.32465	27.2668	0
114796642	regulator of chromosome condensation isoform c [Homo sapiens]	92.38	8.55	3	2	2	3	2.63377e+06	421	44.9406	7.51807
	A4	Sequence	# PSMs	# Proteins	# Protein Groups	Protein Group Accessions	Modifications	ΔCn	Area	q-Value	PEP	IonScore	Exp Value	Charge	MH+ [Da]	ΔM [ppm]	RT [min]	# Missed Cleavages
	High	VVQVSAGDSHTAALTDDGR	1	3	1	114796642		0	638378	0	3.778e-14	70.39	4.4883e-06	2	1898.92	1.0846	31.03	0
	High	SGQVYSFGcNDEGALGR	2	3	1	114796642	C9(Carbamidomethyl)	0	4.62916e+06	0	2.549e-11	43.99	0.00110929	2	1816.8	1.72075	44.7331	0
4758302	enhancer of rudimentary homolog [Homo sapiens]	92.1137	44.23	1	4	4	6	1.59616e+07	104	12.251	5.92236
	A4	Sequence	# PSMs	# Proteins	# Protein Groups	Protein Group Accessions	Modifications	ΔCn	Area	q-Value	PEP	IonScore	Exp Value	Charge	MH+ [Da]	ΔM [ppm]	RT [min]	# Missed Cleavages
	High	TYADYESVNEcMEGVcK	1	1	1	4758302	C11(Carbamidomethyl); C16(Carbamidomethyl)	0	6.42092e+06	0	4.206e-16	59.38	1.00927e-05	2	2054.82	1.9873	45.3889	0
	High	sHTILLVQPTK	2	1	1	4758302	N-Term(Acetyl)	0	3.33403e+07	0	0.0002504	48.91	0.000175442	2	1278.74	0.643554	46.9779	0
	High	ADTQTYQPYNK	2	1	1	4758302		0	8.12365e+06	0	0.001838	24.71	0.0894181	2	1328.61	0.0923558	20.6433	0
	High	MYEEHLK	1	1	1	4758302		0	2.79286e+06	0.004	0.04166	12.29	1.87389	2	949.445	-0.00054522	19.0019	0
5454114	tissue factor pathway inhibitor isoform a precursor [Homo sapiens]	91.88	4.61	1	1	1	1	1.26622e+06	304	34.992	8.25049
	A4	Sequence	# PSMs	# Proteins	# Protein Groups	Protein Group Accessions	Modifications	ΔCn	Area	q-Value	PEP	IonScore	Exp Value	Charge	MH+ [Da]	ΔM [ppm]	RT [min]	# Missed Cleavages
	High	YSGcGGNENNFTSK	1	1	1	5454114	C4(Carbamidomethyl)	0	1.26622e+06	0	4.206e-16	91.88	8.85386e-09	2	1534.62	0.466163	20.7724	0
4506609	60S ribosomal protein L19 [Homo sapiens]	90.4656	13.27	1	2	2	3	6.5095e+06	196	23.4512	11.4731
	A4	Sequence	# PSMs	# Proteins	# Protein Groups	Protein Group Accessions	Modifications	ΔCn	Area	q-Value	PEP	IonScore	Exp Value	Charge	MH+ [Da]	ΔM [ppm]	RT [min]	# Missed Cleavages
	High	VWLDPNETNEIANANSR	2	1	1	4506609		0	7.67923e+06	0	4.206e-16	51.36	0.000352409	2	1942.92	-2.0572	51.076	0
	High	LLADQAEAR	1	1	1	4506609		0	5.33977e+06	0	0.0002504	46.94	0.000681757	2	986.527	0.872843	21.1973	0
302191611	cysteine and glycine-rich protein 1 isoform 3 [Homo sapiens]	90.275	40.11	2	5	5	5	1.08372e+06	187	20.0284	8.48486
	A4	Sequence	# PSMs	# Proteins	# Protein Groups	Protein Group Accessions	Modifications	ΔCn	Area	q-Value	PEP	IonScore	Exp Value	Charge	MH+ [Da]	ΔM [ppm]	RT [min]	# Missed Cleavages
	High	GLESTTLADKDGEIYcK	1	2	1	302191611	C16(Carbamidomethyl)	0	629435	0	6.471e-15	50.26	0.000411606	2	1899.9	-2.48211	39.1215	1
	High	GYGYGQGAGTLSTDK	1	2	1	302191611		0	1.49447e+06	0	0.0002504	40.12	0.00337057	2	1474.68	-0.963153	30.995	0
	High	TVYFAEEVQcEGNSFHK	1	2	1	302191611	C10(Carbamidomethyl)	0	684620	0	1.681e-09	39.93	0.00347557	2	2044.91	-0.21691	50.7346	0
	High	NLDSTTVAVHGEEIYcK	1	2	1	302191611	C16(Carbamidomethyl)	0	1072058	0	1.244e-08	39.02	0.00634716	2	1935.91	1.47893	40.8306	0
	High	ScFLcMVcK	1	2	1	302191611	C2(Carbamidomethyl); C5(Carbamidomethyl); C8(Carbamidomethyl)	0	646445	0.004	0.04066	18.16	0.184835	2	1204.5	-0.199997	53.0149	0
237681111	sodium/potassium-transporting ATPase subunit alpha-1 isoform d [Homo sapiens]	90.0344	9.68	9	6	6	6	969641	992	109.48	5.31299
	A4	Sequence	# PSMs	# Proteins	# Protein Groups	Protein Group Accessions	Modifications	ΔCn	Area	q-Value	PEP	IonScore	Exp Value	Charge	MH+ [Da]	ΔM [ppm]	RT [min]	# Missed Cleavages
	High	GVGIISEGNETVEDIAAR	1	7	1	237681111		0	801170	0	4.816e-10	72.09	3.14261e-06	2	1829.92	-3.36464	58.0105	0
	High	VDNSSLTGESEPQTR	1	8	1	237681111		0	1.17291e+06	0	3.162e-09	46.25	0.000901122	2	1619.75	1.5695	23.1343	0
	High	NLEAVETLGSTSTIcSDK	1	8	1	237681111	C15(Carbamidomethyl)	0	510865	0	0.0002504	33.26	0.0245237	2	1924.92	1.72387	50.0427	0
	High	AVFQANQENLPILK	1	3	1	237681111		0	934839	0	0.0003672	21.88	0.212752	2	1584.87	-1.57455	58.6362	0
	High	DMTSEQLDDILK	1	3	1	237681111		0	0	0.002	0.001838	13.18	1.74545	2	1407.66	-3.79954	58.8955	0
	Medium	QGAIVAVTGDGVNDSPALK	1	7	1	237681111		0	0	0.014	0.1239	16.47	1.09331	2	1811.93	-12.73	46.3942	0
4885371	histone H1.0 [Homo sapiens]	89.7145	18.04	1	3	3	4	3.75472e+06	194	20.8502	10.8433
	A4	Sequence	# PSMs	# Proteins	# Protein Groups	Protein Group Accessions	Modifications	ΔCn	Area	q-Value	PEP	IonScore	Exp Value	Charge	MH+ [Da]	ΔM [ppm]	RT [min]	# Missed Cleavages
	High	YSDMIVAAIQAEK	1	1	1	4885371		0	5.11528e+06	0	1.123e-09	83.69	2.04161e-07	2	1438.72	0.131932	59.2485	0
	High	GVGASGSFR	1	1	1	4885371		0	3.80089e+06	0	0.0002504	34.35	0.0134609	2	837.422	0.853099	19.6574	0
	High	TENSTSAPAAKPK	1	1	1	4885371		0	0	0.003	0.03015	11.18	3.27313	2	1301.67	1.1976	8.43577	0
	High	tENSTSAPAAKPK	1	1	1	4885371	N-Term(Acetyl)	0	2.34799e+06	0.005	0.04175	11.11	3.06687	2	1343.68	-1.7968	13.322	0
12056465	rRNA 2'-O-methyltransferase fibrillarin [Homo sapiens]	89.42	17.76	1	4	4	4	2.2561e+06	321	33.7634	10.1841
	A4	Sequence	# PSMs	# Proteins	# Protein Groups	Protein Group Accessions	Modifications	ΔCn	Area	q-Value	PEP	IonScore	Exp Value	Charge	MH+ [Da]	ΔM [ppm]	RT [min]	# Missed Cleavages
	High	ANcIDSTASAEAVFASEVK	1	1	1	12056465	C3(Carbamidomethyl)	0	1.01728e+06	0	6.201e-13	75.81	1.21764e-06	2	1969.91	-1.77744	58.9195	0
	High	VSISEGDDKIEYR	1	1	1	12056465		0	1.01444e+06	0	0.0002504	37.11	0.00904592	2	1510.74	0.329574	34.8443	1
	High	DHAVVVGVYRPPPK	1	1	1	12056465		0	967801	0	0.0005476	17.46	0.50791	3	1533.85	-0.052474	30.9926	0
	Medium	TNIIPVIEDAR	1	1	1	12056465		0	4.73658e+06	0.015	0.1275	11.95	1.62438	2	1240.69	-0.998808	55.5127	0
20357599	histone H2A.V isoform 2 [Homo sapiens]	88.5573	22.81	8	1	3	8	1.40197e+08	114	12.1387	10.4624
	A4	Sequence	# PSMs	# Proteins	# Protein Groups	Protein Group Accessions	Modifications	ΔCn	Area	q-Value	PEP	IonScore	Exp Value	Charge	MH+ [Da]	ΔM [ppm]	RT [min]	# Missed Cleavages
	High	AGLQFPVGR	5	17	3	20357599;10800144;28195394		0	3.75302e+08	0	0.0002504	42.49	0.00283792	2	944.532	1.11579	45.5324	0
	High	GDEELDSLIK	2	5	1	20357599		0	1.10217e+07	0	0.0007246	25.56	0.131758	2	1118.56	1.34846	49.7448	0
	High	HLQLAIR	1	17	2	20357599;10800144		0	3.42688e+07	0.004	0.03408	28.47	0.011023	2	850.526	0.45777	33.6452	0
5031755	heterogeneous nuclear ribonucleoprotein R isoform 2 [Homo sapiens]	87.0829	7.42	4	2	4	4	5.87945e+06	633	70.8993	8.1333
	A4	Sequence	# PSMs	# Proteins	# Protein Groups	Protein Group Accessions	Modifications	ΔCn	Area	q-Value	PEP	IonScore	Exp Value	Charge	MH+ [Da]	ΔM [ppm]	RT [min]	# Missed Cleavages
	High	DLYEDELVPLFEK	1	4	1	5031755		0	2.38477e+06	0	5.276e-09	51.19	0.000374081	2	1609.8	-1.46757	67.9628	0
	High	NLATTVTEEILEK	1	4	1	5031755		0	5.28912e+06	0	3.867e-11	47.84	0.000785187	2	1460.78	-1.57537	66.6281	0
	High	TGYTLDVTTGQR	1	10	2	228008398;5031755		0	9.96445e+06	0	9.363e-10	47.04	0.000741364	2	1311.65	-0.824662	37.6338	0
	High	SAFLcGVMK	1	7	2	228008398;5031755	C5(Carbamidomethyl)	0	487544	0.002	0.008328	11.3	1.87181	2	1012.5	0.638075	49.6572	0
4507955	transcriptional repressor protein YY1 [Homo sapiens]	86.0559	15.94	3	6	6	8	1.55031e+07	414	44.6847	6.25244
	A4	Sequence	# PSMs	# Proteins	# Protein Groups	Protein Group Accessions	Modifications	ΔCn	Area	q-Value	PEP	IonScore	Exp Value	Charge	MH+ [Da]	ΔM [ppm]	RT [min]	# Missed Cleavages
	High	SYLSGGAGAAGGGGADPGNK	1	1	1	4507955		0	2.50459e+07	0	8.747e-11	51.9	0.00028086	2	1663.77	0.872108	26.5307	0
	High	TLEGEFSVTMWSSDEK	1	1	1	4507955		0	646372	0	2.949e-06	45.21	0.000997305	2	1845.82	-0.990218	62.8484	0
	High	VHVcAEcGK	3	2	1	4507955	C4(Carbamidomethyl); C7(Carbamidomethyl)	0	1.77476e+07	0	0.0004167	39.04	0.00228271	2	1059.47	0.284836	11.1892	0
	High	EEVVGGDDSDGLR	1	1	1	4507955		0	643587	0.003	0.02947	13.92	1.06649	2	1347.61	2.61297	28.2882	0
	High	SYLSGGAGAAGGGGADPGNKK	1	1	1	4507955		0	1.11848e+06	0.004	0.04129	16.02	1.28143	2	1791.86	-0.41609	22.8029	1
	Medium	QLAEFAR	1	2	1	4507955		0	3.71564e+06	0.013	0.1216	19.41	0.528081	2	834.446	-1.00643	30.8357	0
12056468	junction plakoglobin [Homo sapiens]	85.8735	12.62	1	6	7	8	3.14704e+06	745	81.6927	6.13818
	A4	Sequence	# PSMs	# Proteins	# Protein Groups	Protein Group Accessions	Modifications	ΔCn	Area	q-Value	PEP	IonScore	Exp Value	Charge	MH+ [Da]	ΔM [ppm]	RT [min]	# Missed Cleavages
	High	LLNDEDPVVVTK	1	1	1	12056468		0	3.83324e+06	0	1.307e-08	49.82	0.000314259	2	1341.73	2.0243	41.3163	0
	High	ALmGSPQLVAAVVR	1	1	1	12056468	M3(Oxidation)	0	4.29209e+06	0	5.08e-10	43.37	0.00147282	2	1427.81	2.31983	54.7104	0
	High	ALMGSPQLVAAVVR	1	1	1	12056468		0	850500	0	2.263e-05	43.08	0.00108249	2	1411.81	-1.6015	61.3799	0
	High	TMQNTSDLDTAR	1	1	1	12056468		0	1.3158e+06	0	0.0003003	29.25	0.0379726	2	1352.61	-0.180287	22.7958	0
	High	HVAAGTQQPYTDGVR	1	1	1	12056468		0	455356	0	0.0002504	25.84	0.127702	2	1599.79	0.960582	20.593	0
	High	VAAGVLcELAQDK	1	2	2	12056468;148233338	C7(Carbamidomethyl)	0	0	0	0.0002504	19.86	0.515348	2	1373.71	2.21636	53.3026	0
	High	SAIVHLINYQDDAELATR	1	1	1	12056468		0	1.09356e+06	0	0.0002504	10.37	4.38504	3	2029.03	-1.21558	56.3585	0
	High	AAmIVNQLSK	1	1	1	12056468	M3(Oxidation)	0	0	0.002	0.001932	19.71	0.528648	2	1090.59	0.569366	30.636	0
349732256	thioredoxin isoform 2 [Homo sapiens]	85.6525	25.88	2	2	2	3	8.86635e+06	85	9.44569	6.03662
	A4	Sequence	# PSMs	# Proteins	# Protein Groups	Protein Group Accessions	Modifications	ΔCn	Area	q-Value	PEP	IonScore	Exp Value	Charge	MH+ [Da]	ΔM [ppm]	RT [min]	# Missed Cleavages
	High	TAFQEALDAAGDK	1	2	1	349732256		0	6.42357e+06	0	9.851e-13	72.17	2.54526e-06	2	1336.63	-2.66661	48.82	0
	High	VGEFSGANK	2	2	1	349732256		0	1.13091e+07	0.002	0.001838	42.4	0.00208309	2	908.447	-0.15541	16.7441	0
7662645	28S ribosomal protein S18b, mitochondrial [Homo sapiens]	85.2772	26.36	1	5	5	6	1.11842e+07	258	29.377	9.37842
	A4	Sequence	# PSMs	# Proteins	# Protein Groups	Protein Group Accessions	Modifications	ΔCn	Area	q-Value	PEP	IonScore	Exp Value	Charge	MH+ [Da]	ΔM [ppm]	RT [min]	# Missed Cleavages
	High	APSEEDSLSSVPISPYK	1	1	1	7662645		0	1.68894e+06	0	9.488e-15	48.7	0.00070888	2	1805.88	-0.542212	49.6668	0
	High	TPAEASSTGQTGPQSAL	2	1	1	7662645		0	1.39763e+07	0	2.586e-11	41.13	0.00331874	2	1602.76	1.15892	32.4941	0
	High	APSEEDSLSSVPISPYKDEPWK	1	1	1	7662645		0	7.53074e+06	0	1.545e-10	34.86	0.0186155	3	2461.18	0.349141	56.7502	1
	High	LYQGHLQEESGPPPESMPK	1	1	1	7662645		0	8.42013e+06	0	4.978e-07	20.49	0.473005	3	2124	-2.40124	36.4566	0
	High	VVGNPcPIcR	1	1	1	7662645	C6(Carbamidomethyl); C9(Carbamidomethyl)	0	1.11562e+07	0	0.0002504	19.75	0.323602	2	1171.57	0.393917	26.4139	0
4504445	heterogeneous nuclear ribonucleoprotein A1 isoform a [Homo sapiens]	85.0898	14.37	3	4	4	6	1.29749e+07	320	34.1753	9.23193
	A4	Sequence	# PSMs	# Proteins	# Protein Groups	Protein Group Accessions	Modifications	ΔCn	Area	q-Value	PEP	IonScore	Exp Value	Charge	MH+ [Da]	ΔM [ppm]	RT [min]	# Missed Cleavages
	High	SSGPYGGGGQYFAKPR	1	2	1	4504445		0	6.79974e+06	0	0.0002504	56.81	9.29683e-05	2	1628.78	2.03735	33.3986	0
	High	IEVIEIMTDR	1	3	1	4504445		0	2.12474e+07	0	9.942e-08	36.92	0.0107715	2	1218.64	1.01718	59.9389	0
	High	YHTVNGHNcEVR	2	2	1	4504445	C9(Carbamidomethyl)	0	1.08777e+07	0	0.0002504	24.23	0.101378	2	1485.66	-2.54482	13.0517	0
	High	DYFEQYGK	2	3	1	4504445		0	4.40817e+06	0.001	0.001838	38.92	0.00222484	1	1049.46	0.39492	36.8191	0
4759140	Na(+)/H(+) exchange regulatory cofactor NHE-RF1 [Homo sapiens]	85.0885	26.26	1	8	8	8	8.32111e+06	358	38.8446	5.77002
	A4	Sequence	# PSMs	# Proteins	# Protein Groups	Protein Group Accessions	Modifications	ΔCn	Area	q-Value	PEP	IonScore	Exp Value	Charge	MH+ [Da]	ΔM [ppm]	RT [min]	# Missed Cleavages
	High	sADAAAGAPLPR	1	1	1	4759140	N-Term(Acetyl)	0	5.78682e+06	0	1.32e-06	49.41	0.000501735	2	1138.58	-0.477764	35.7376	0
	High	SVDPDSPAEASGLR	1	1	1	4759140		0	6.88298e+06	0	0.0002504	47.16	0.000723082	2	1400.67	2.11984	31.4967	0
	High	LLVVDPETDEQLQK	1	1	1	4759140		0	1.22935e+07	0	9.532e-10	44.98	0.00106584	2	1626.86	0.74838	48.578	0
	High	LVEVNGENVEK	1	1	1	4759140		0	2.81291e+06	0.001	0.001838	26.54	0.0892824	2	1229.64	1.277	28.2678	0
	High	LVEPGSPAEK	1	1	1	4759140		0	3.44985e+06	0.001	0.001838	26.28	0.0748906	2	1026.55	-0.340026	20.7562	0
	High	AGLLAGDR	1	1	1	4759140		0	623852	0.002	0.002725	24.81	0.120089	2	772.431	-0.514698	24.9252	0
	High	APQMDWSK	1	1	1	4759140		0	0	0.002	0.005837	17.77	0.388529	2	962.442	1.7432	31.5394	0
	High	EALAEAALESPRPALVR	1	1	1	4759140		0	1.24011e+06	0.002	0.01206	16.83	0.54259	3	1792.99	-0.141163	52.261	0
18201905	glucose-6-phosphate isomerase isoform 2 [Homo sapiens]	84.8809	10.93	2	4	4	4	1.25065e+06	558	63.1072	8.32373
	A4	Sequence	# PSMs	# Proteins	# Protein Groups	Protein Group Accessions	Modifications	ΔCn	Area	q-Value	PEP	IonScore	Exp Value	Charge	MH+ [Da]	ΔM [ppm]	RT [min]	# Missed Cleavages
	High	FAAYFQQGDMESNGK	1	2	1	18201905		0	1.02542e+06	0	3.138e-08	57.33	3.92045e-05	2	1692.73	-0.200922	44.4403	0
	High	TFTTQETITNAETAK	1	2	1	18201905		0	1.94892e+06	0	4.622e-14	52.81	0.000234311	2	1655.82	2.19485	37.2589	0
	High	VWYVSNIDGTHIAK	1	2	1	18201905		0	777609	0	0.0002504	24.94	0.147969	2	1602.83	0.254025	50.0522	0
	High	TLAQLNPESSLFIIASK	1	2	1	18201905		0	0	0	4.928e-07	21.64	0.144981	2	1832.02	-0.769127	67.9865	0
222352151	poly(rC)-binding protein 1 [Homo sapiens]	84.8666	19.66	1	3	5	5	8.29542e+06	356	37.4739	7.09326
	A4	Sequence	# PSMs	# Proteins	# Protein Groups	Protein Group Accessions	Modifications	ΔCn	Area	q-Value	PEP	IonScore	Exp Value	Charge	MH+ [Da]	ΔM [ppm]	RT [min]	# Missed Cleavages
	High	LVVPATQcGSLIGK	1	1	1	222352151	C8(Carbamidomethyl)	0	7.79024e+06	0	2.136e-07	50.93	0.000291008	2	1442.81	1.69293	47.7776	0
	High	INISEGNcPER	1	10	2	193083114;222352151	C8(Carbamidomethyl)	0	1.34552e+07	0	0.0002504	38.61	0.00343614	2	1288.59	-0.715113	26.294	0
	High	ESTGAQVQVAGDMLPNSTER	1	10	2	193083114;222352151		0	3.64086e+06	0	7.26e-10	32.82	0.0266683	2	2089.99	2.68668	45.1342	0
	High	QGANINEIR	1	1	1	222352151		0	2.96266e+06	0.001	0.001838	37.63	0.00497041	2	1014.53	1.7152	25.5982	0
	High	AITIAGVPQSVTEcVK	1	1	1	222352151	C14(Carbamidomethyl)	0	2.5314e+06	0.001	0.001838	21.55	0.326126	2	1672.9	1.929	55.2416	0
208879470	eukaryotic translation elongation factor 1 epsilon-1 isoform 2 [Homo sapiens]	84.6791	7.91	2	1	1	2	1.24101e+07	139	15.5382	8.33838
	A4	Sequence	# PSMs	# Proteins	# Protein Groups	Protein Group Accessions	Modifications	ΔCn	Area	q-Value	PEP	IonScore	Exp Value	Charge	MH+ [Da]	ΔM [ppm]	RT [min]	# Missed Cleavages
	High	aAAAELSLLEK	2	2	1	208879470	N-Term(Acetyl)	0	1.24101e+07	0	6.404e-06	68.3	5.61322e-06	2	1157.64	0.515705	64.9034	0
114326455	chromodomain-helicase-DNA-binding protein 8 isoform 2 [Homo sapiens]	84.33	0.78	2	1	1	1	5.46605e+06	2302	262.183	6.68311
	A4	Sequence	# PSMs	# Proteins	# Protein Groups	Protein Group Accessions	Modifications	ΔCn	Area	q-Value	PEP	IonScore	Exp Value	Charge	MH+ [Da]	ΔM [ppm]	RT [min]	# Missed Cleavages
	High	APGYPSSPVTTASGTTLR	1	2	1	114326455		0	5.46605e+06	0	4.206e-16	84.33	2.0017e-07	2	1762.9	0.871218	40.7456	0
224591430	cell growth-regulating nucleolar protein [Homo sapiens]	83.94	12.93	1	4	4	4	3.22623e+06	379	43.6069	9.56885
	A4	Sequence	# PSMs	# Proteins	# Protein Groups	Protein Group Accessions	Modifications	ΔCn	Area	q-Value	PEP	IonScore	Exp Value	Charge	MH+ [Da]	ΔM [ppm]	RT [min]	# Missed Cleavages
	High	ELLEQISAFDNVPR	1	1	1	224591430		0	3.90879e+06	0	6.052e-11	65.32	1.48792e-05	2	1630.84	-1.66993	63.2162	0
	High	VFFTcNAcGESVK	1	1	1	224591430	C5(Carbamidomethyl); C8(Carbamidomethyl)	0	3.24412e+06	0	0.0002504	40.12	0.0024951	2	1518.67	0.353888	42.345	0
	High	NcEcLScIDcGK	1	1	1	224591430	C2(Carbamidomethyl); C4(Carbamidomethyl); C7(Carbamidomethyl); C10(Carbamidomethyl)	0	1.25758e+06	0	0.001838	15.5	0.142328	2	1515.57	1.18065	31.6674	0
	High	QAPDNEITIK	1	1	1	224591430		0	2.52577e+06	0.002	0.001838	23.33	0.152593	2	1128.59	1.35634	30.1857	0
28195394	histone H2A type 2-B [Homo sapiens]	82.81	12.31	2	1	2	6	1.89199e+08	130	13.9868	10.8872
	A4	Sequence	# PSMs	# Proteins	# Protein Groups	Protein Group Accessions	Modifications	ΔCn	Area	q-Value	PEP	IonScore	Exp Value	Charge	MH+ [Da]	ΔM [ppm]	RT [min]	# Missed Cleavages
	High	AGLQFPVGR	5	17	3	20357599;10800144;28195394		0	3.75302e+08	0	0.0002504	42.49	0.00283792	2	944.532	1.11579	45.5324	0
	Medium	HLQLAVR	1	1	1	28195394		0	3.09679e+06	0.035	0.3055	14.5	0.280303	2	836.512	1.73571	27.5624	0
381342476	heterogeneous nuclear ribonucleoprotein H [Homo sapiens]	82.7141	18.93	2	5	6	6	3.59888e+06	449	49.1984	6.30322
	A4	Sequence	# PSMs	# Proteins	# Protein Groups	Protein Group Accessions	Modifications	ΔCn	Area	q-Value	PEP	IonScore	Exp Value	Charge	MH+ [Da]	ΔM [ppm]	RT [min]	# Missed Cleavages
	High	STGEAFVQFASQEIAEK	1	2	1	381342476		0	5.82416e+06	0	4.206e-16	52.72	0.000271291	2	1841.89	0.319352	63.3409	0
	High	mMLGTEGGEGFVVK	1	1	1	381342476	N-Term(Acetyl)	0	1.66138e+06	0	2.171e-08	48.13	0.000676788	2	1496.71	1.53869	65.7263	0
	High	GLPWScSADEVQR	1	1	1	381342476	C6(Carbamidomethyl)	0	3.16784e+06	0	0.0002504	36.27	0.00708143	2	1504.69	2.43966	46.451	0
	High	DLNYcFSGMSDHR	1	2	1	381342476	C5(Carbamidomethyl)	0	767601	0	0.0002504	24.45	0.0500696	2	1601.65	2.10095	44.0382	0
	High	ATENDIYNFFSPLNPVR	1	2	2	148470406;381342476		0	0	0	0.0002504	15.1	1.65485	2	1996.98	0.354075	69.4335	0
	High	SNNVEMDWVLK	1	1	1	381342476		0	1.80465e+06	0.002	0.007219	9.92	4.8485	2	1334.64	0.866257	59.2698	0
4506643	60S ribosomal protein L37a [Homo sapiens]	82.5885	51.09	1	4	4	6	1.6587e+07	92	10.2685	10.4331
	A4	Sequence	# PSMs	# Proteins	# Protein Groups	Protein Group Accessions	Modifications	ΔCn	Area	q-Value	PEP	IonScore	Exp Value	Charge	MH+ [Da]	ΔM [ppm]	RT [min]	# Missed Cleavages
	High	TVAGGAWTYNTTSAVTVK	1	1	1	4506643		0	1.71614e+07	0	4.206e-16	62.61	2.63721e-05	2	1826.92	-2.52755	48.7034	0
	High	AVGIWHcGScMK	1	1	1	4506643	C7(Carbamidomethyl); C10(Carbamidomethyl)	0	1.22242e+07	0	0.0005982	24.42	0.0784259	2	1405.62	-1.70137	36.5327	0
	High	YTcSFcGK	2	1	1	4506643	C3(Carbamidomethyl); C6(Carbamidomethyl)	0	2.03754e+07	0.002	0.004059	34.94	0.00193979	1	1022.41	-0.0556218	23.0513	0
	High	KIEISQHAK	1	1	1	4506643		0	6.22389e+06	0.002	0.001838	26.66	0.0391631	2	1053.6	-0.358173	12.1153	1
	High	AVGIWHcGScmK	1	1	1	4506643	C7(Carbamidomethyl); C10(Carbamidomethyl); M11(Oxidation)	0	1.82741e+06	0.002	0.002876	22.3	0.110997	2	1421.61	1.55123	30.104	0
55956921	heterogeneous nuclear ribonucleoprotein A/B isoform b [Homo sapiens]	81.8094	8.42	2	1	2	4	2.10836e+07	285	30.5691	7.91357
	A4	Sequence	# PSMs	# Proteins	# Protein Groups	Protein Group Accessions	Modifications	ΔCn	Area	q-Value	PEP	IonScore	Exp Value	Charge	MH+ [Da]	ΔM [ppm]	RT [min]	# Missed Cleavages
	High	IFVGGLNPEATEEK	1	2	1	55956921		0	2.18942e+07	0	1.563e-10	59.21	5.64364e-05	2	1503.77	1.41941	48.1073	0
	High	FGEVVDcTIK	3	8	3	51477708;55956921;332801090	C7(Carbamidomethyl)	0	2.02729e+07	0	0.001838	51.86	0.000246316	2	1167.57	-1.49503	39.9434	0
32483377	thioredoxin-dependent peroxide reductase, mitochondrial isoform b [Homo sapiens]	81.01	5.88	2	1	1	1	7.00029e+06	238	25.8223	7.45947
	A4	Sequence	# PSMs	# Proteins	# Protein Groups	Protein Group Accessions	Modifications	ΔCn	Area	q-Value	PEP	IonScore	Exp Value	Charge	MH+ [Da]	ΔM [ppm]	RT [min]	# Missed Cleavages
	High	DYGVLLEGSGLALR	1	2	1	32483377		0	7.00029e+06	0	4.206e-16	81.01	3.29284e-07	2	1462.79	1.83273	63.9779	0
4502599	carbonyl reductase [NADPH] 1 [Homo sapiens]	80.8131	15.16	2	3	3	3	1.01451e+06	277	30.3559	8.32373
	A4	Sequence	# PSMs	# Proteins	# Protein Groups	Protein Group Accessions	Modifications	ΔCn	Area	q-Value	PEP	IonScore	Exp Value	Charge	MH+ [Da]	ΔM [ppm]	RT [min]	# Missed Cleavages
	High	SETITEEELVGLMNK	1	1	1	4502599		0	1.23323e+06	0	4.802e-09	60.22	4.72451e-05	2	1692.83	-1.31224	63.2373	0
	High	GQAAVQQLQAEGLSPR	1	2	1	4502599		0	1.45696e+06	0	4.978e-11	49.08	0.000545053	2	1652.87	-1.71905	42.5039	0
	High	LFSGDVVLTAR	1	1	1	4502599		0	353338	0.003	0.01836	14.04	1.19323	2	1177.66	2.82337	52.0554	0
29826335	eukaryotic translation initiation factor 2 subunit 2 [Homo sapiens]	80.28	9.61	1	3	3	3	1.12822e+06	333	38.3644	5.79541
	A4	Sequence	# PSMs	# Proteins	# Protein Groups	Protein Group Accessions	Modifications	ΔCn	Area	q-Value	PEP	IonScore	Exp Value	Charge	MH+ [Da]	ΔM [ppm]	RT [min]	# Missed Cleavages
	High	DASDDLDDLNFFNQK	1	1	1	29826335		0	854774	0	4.206e-16	80.28	3.51117e-07	2	1756.77	0.503238	63.8057	0
	High	SPDTILQK	1	1	1	29826335		0	1.44419e+06	0.001	0.001838	22.96	0.254177	2	901.498	-0.758427	26.1878	0
	Medium	TGFQAVTGK	1	1	1	29826335		0	1.08568e+06	0.027	0.2419	21.21	0.264135	2	908.483	-0.897777	26.1073	0
162329583	cleavage and polyadenylation specificity factor subunit 6 [Homo sapiens]	80.15	2.54	1	1	1	1	1.20589e+06	551	59.1734	7.15186
	A4	Sequence	# PSMs	# Proteins	# Protein Groups	Protein Group Accessions	Modifications	ΔCn	Area	q-Value	PEP	IonScore	Exp Value	Charge	MH+ [Da]	ΔM [ppm]	RT [min]	# Missed Cleavages
	High	TPLSEAEFEEIMNR	1	1	1	162329583		0	1.20589e+06	0	3.395e-15	80.15	4.75297e-07	2	1665.78	-0.130376	62.5575	0
118572613	serine/arginine repetitive matrix protein 2 [Homo sapiens]	79.9032	2.43	1	5	5	5	1.98143e+06	2752	299.438	12.0591
	A4	Sequence	# PSMs	# Proteins	# Protein Groups	Protein Group Accessions	Modifications	ΔCn	Area	q-Value	PEP	IonScore	Exp Value	Charge	MH+ [Da]	ΔM [ppm]	RT [min]	# Missed Cleavages
	High	AAFGISDSYVDGSSFDPQR	1	1	1	118572613		0	1.53552e+06	0	9.014e-16	74.39	1.23913e-06	2	2018.91	-0.00301354	58.6794	0
	High	TPQAPASANLVGPR	1	1	1	118572613		0	2.23544e+06	0	0.0002504	34.29	0.015566	2	1378.74	-1.67444	34.1416	0
	High	TAVAPSAVNLADPR	1	1	1	118572613		0	1.74535e+06	0	0.00046	28.28	0.0539395	2	1381.75	1.83679	40.5145	0
	High	SPVPSAFSDQSR	1	1	1	118572613		0	1963490	0.001	0.001838	21.17	0.28873	2	1277.61	-1.14902	33.9468	0
	High	VPLSAYER	1	1	1	118572613		0	941793	0.009	0.09629	19.13	0.569359	2	934.498	-1.73791	30.854	0
4501867	aconitate hydratase, mitochondrial precursor [Homo sapiens]	79.7634	8.97	1	5	5	5	1.48127e+06	780	85.3719	7.60596
	A4	Sequence	# PSMs	# Proteins	# Protein Groups	Protein Group Accessions	Modifications	ΔCn	Area	q-Value	PEP	IonScore	Exp Value	Charge	MH+ [Da]	ΔM [ppm]	RT [min]	# Missed Cleavages
	High	DINQEVYNFLATAGAK	1	1	1	4501867		0	0	0	6.694e-10	57.57	8.44301e-05	2	1753.88	1.5578	69.6897	0
	High	WVVIGDENYGEGSSR	1	1	1	4501867		0	2.63749e+06	0	3.132e-09	48.01	0.000726583	2	1667.77	1.88955	50.0498	0
	High	DSSGQHVDVSPTSQR	1	1	1	4501867		0	1.26701e+06	0	0.0009622	16.98	0.749673	2	1599.74	0.352823	18.1559	0
	High	QGLLPLTFADPADYNK	1	1	1	4501867		0	539306	0.001	0.001838	20.75	0.456457	2	1762.9	-1.48403	66.7204	0
	High	EHAALEPR	1	1	1	4501867		0	534233	0.002	0.006657	14.35	1.33507	2	922.475	0.482006	12.5444	0
34101286	zinc finger RNA-binding protein [Homo sapiens]	79.7358	5.4	1	4	4	4	1.37756e+06	1074	116.939	9.0415
	A4	Sequence	# PSMs	# Proteins	# Protein Groups	Protein Group Accessions	Modifications	ΔCn	Area	q-Value	PEP	IonScore	Exp Value	Charge	MH+ [Da]	ΔM [ppm]	RT [min]	# Missed Cleavages
	High	GLTTTGNSSLNSTSNTK	1	1	1	34101286		0	1.10754e+06	0	7.944e-12	62.06	2.77235e-05	2	1682.82	0.543527	23.1367	0
	High	AGYSQGATQYTQAQQTR	1	1	1	34101286		0	0	0	9.649e-09	47.3	0.000878905	2	1858.87	-0.210914	25.8995	0
	High	STPVTSAVQIPEVK	1	1	1	34101286		0	1.64757e+06	0	0.0002504	24.08	0.119793	2	1455.81	-0.206065	48.9903	0
	Medium	IScAGPQTYK	1	1	1	34101286	C3(Carbamidomethyl)	0	0	0.02	0.2027	13.43	1.56837	2	1124.54	1.36454	20.8825	0
4557237	acetyl-CoA acetyltransferase, mitochondrial precursor [Homo sapiens]	78.3388	12.18	1	4	4	4	1.15348e+06	427	45.1706	8.85107
	A4	Sequence	# PSMs	# Proteins	# Protein Groups	Protein Group Accessions	Modifications	ΔCn	Area	q-Value	PEP	IonScore	Exp Value	Charge	MH+ [Da]	ΔM [ppm]	RT [min]	# Missed Cleavages
	High	EAYMGNVLQGGEGQAPTR	1	1	1	4557237		0	0	0	0.0002504	60.33	3.42927e-05	2	1877.85	-18.126	43.3331	0
	High	NEQDAYAINSYTR	1	1	1	4557237		0	1.91601e+06	0	7.913e-08	41.58	0.00226578	2	1544.7	-0.430044	36.7804	0
	High	EVVIVSATR	1	1	1	4557237		0	735292	0.002	0.002133	18.43	0.51247	2	973.568	0.0146749	31.1537	0
	High	IHMGScAENTAK	1	1	1	4557237	C6(Carbamidomethyl)	0	809135	0.003	0.02367	25.04	0.0645457	2	1318.59	-0.0600237	16.1555	0
40805862	tumor protein D54 isoform f [Homo sapiens]	77.9364	47.31	10	6	6	6	1.98423e+06	186	19.8891	5.47803
	A4	Sequence	# PSMs	# Proteins	# Protein Groups	Protein Group Accessions	Modifications	ΔCn	Area	q-Value	PEP	IonScore	Exp Value	Charge	MH+ [Da]	ΔM [ppm]	RT [min]	# Missed Cleavages
	High	mDSAGQDINLNSPNK	1	9	1	40805862	N-Term(Acetyl)	0	1.73107e+06	0	5.028e-09	49.53	0.000345431	2	1645.74	-4.00626	43.4654	0
	High	VEEEIVTLR	1	9	1	40805862		0	1.23341e+06	0	0.0002504	40.88	0.00417274	2	1087.6	-0.120023	42.1599	0
	High	TSAALSTVGSAISR	1	9	1	40805862		0	2.98822e+06	0	0.000105	39.84	0.00449769	2	1320.71	-1.28771	42.4782	0
	High	GLLSDSMTDVPVDTGVAAR	1	8	1	40805862		0	912096	0	8.606e-16	33.81	0.0213778	2	1903.94	-0.662436	58.927	0
	High	LGLSTLGELK	1	10	1	40805862		0	665043	0	0.0004619	29.14	0.0276101	2	1030.61	-0.627044	56.4731	0
	High	TPAVEGLTEAEEEELRAELTK	1	9	1	40805862		0	0	0	0.001838	14.92	1.66851	3	2315.17	1.55966	62.9635	1
4506597	60S ribosomal protein L12 [Homo sapiens]	77.7653	24.24	1	3	3	4	2.73072e+06	165	17.8075	9.42236
	A4	Sequence	# PSMs	# Proteins	# Protein Groups	Protein Group Accessions	Modifications	ΔCn	Area	q-Value	PEP	IonScore	Exp Value	Charge	MH+ [Da]	ΔM [ppm]	RT [min]	# Missed Cleavages
	High	EILGTAQSVGcNVDGR	1	1	1	4506597	C11(Carbamidomethyl)	0	4.00911e+06	0	1.22e-06	56.16	0.000115604	2	1675.81	1.33328	39.417	0
	High	cTGGEVGATSALAPK	2	1	1	4506597	C1(Carbamidomethyl)	0	1.81973e+06	0	5.109e-13	46.34	0.00102781	2	1418.69	-0.0717306	31.2369	0
	High	IGPLGLSPK	1	1	1	4506597		0	2.36333e+06	0.001	0.001838	18.15	0.1133	2	881.545	-0.84503	42.9287	0
108773793	glucose-6-phosphate 1-dehydrogenase isoform b [Homo sapiens]	77.51	5.05	2	2	2	2	1.43813e+06	515	59.219	6.84424
	A4	Sequence	# PSMs	# Proteins	# Protein Groups	Protein Group Accessions	Modifications	ΔCn	Area	q-Value	PEP	IonScore	Exp Value	Charge	MH+ [Da]	ΔM [ppm]	RT [min]	# Missed Cleavages
	High	NSYVAGQYDDAASYQR	1	2	1	108773793		0	1.87283e+06	0	4.206e-16	77.51	4.7016e-07	2	1807.78	-2.68202	35.4388	0
	High	GPTEADELMK	1	2	1	108773793		0	1.00344e+06	0.003	0.01812	14.52	1.12136	2	1090.51	-0.428296	32.48	0
82659089	double-stranded RNA-binding protein Staufen homolog 1 isoform a [Homo sapiens]	77.3392	10.08	3	4	4	4	2.24442e+06	496	54.8996	9.51025
	A4	Sequence	# PSMs	# Proteins	# Protein Groups	Protein Group Accessions	Modifications	ΔCn	Area	q-Value	PEP	IonScore	Exp Value	Charge	MH+ [Da]	ΔM [ppm]	RT [min]	# Missed Cleavages
	High	ELLYGGTSPTAETILK	1	3	1	82659089		0	1.96194e+06	0	2.033e-12	56.27	8.98162e-05	2	1692.9	-1.62664	58.4645	0
	High	VSVGEFVGEGEGK	1	3	1	82659089		0	2.32512e+06	0	0.0002504	50.41	0.000441308	2	1293.63	1.9247	44.6783	0
	High	TGNGPMSVcGR	1	3	1	82659089	C9(Carbamidomethyl)	0	545486	0.002	0.002507	17.82	0.355998	2	1135.5	-0.44471	22.1987	0
	High	ILQNEPLPER	1	3	1	82659089		0	2.44621e+06	0.003	0.02119	17.44	0.578769	2	1208.66	-1.85403	34.0356	0
17978466	cyclin-T1 isoform a [Homo sapiens]	77.0284	4.27	1	2	2	2	1.2966e+06	726	80.6345	8.77783
	A4	Sequence	# PSMs	# Proteins	# Protein Groups	Protein Group Accessions	Modifications	ΔCn	Area	q-Value	PEP	IonScore	Exp Value	Charge	MH+ [Da]	ΔM [ppm]	RT [min]	# Missed Cleavages
	High	TYSLSSSFSSSSSTR	1	1	1	17978466		0	1.39725e+06	0	1.15e-09	60.53	2.61994e-05	2	1583.72	0.789781	40.1051	0
	High	GPSEETGGAVFDHPAK	1	1	1	17978466		0	1.19594e+06	0	1.062e-07	41.86	0.00266516	2	1598.75	0.651616	28.4476	0
5803207	splicing factor U2AF 35 kDa subunit isoform a [Homo sapiens]	76.6941	17.5	5	4	4	4	3.66474e+06	240	27.8545	8.80713
	A4	Sequence	# PSMs	# Proteins	# Protein Groups	Protein Group Accessions	Modifications	ΔCn	Area	q-Value	PEP	IonScore	Exp Value	Charge	MH+ [Da]	ΔM [ppm]	RT [min]	# Missed Cleavages
	High	YGEVEEMNVcDNLGDHLVGNVYVK	1	3	1	5803207	C10(Carbamidomethyl)	0	1.6448e+06	0	1.354e-15	61.88	2.86372e-05	3	2753.25	-0.836034	60.4615	0
	High	VNcSFYFK	1	4	1	5803207	C3(Carbamidomethyl)	0	1.84343e+06	0.001	0.001838	38.93	0.00360146	2	1064.49	-0.01806	44.1409	0
	High	AVIDLNNR	1	3	1	5803207		0	7.22958e+06	0.002	0.001838	29.26	0.0337944	2	914.505	-0.302621	31.7538	0
	High	DKVNcSFYFK	1	4	1	5803207	C5(Carbamidomethyl)	0	1.9212e+06	0.005	0.04173	23.2	0.18882	2	1307.61	0.660373	40.8888	1
228008398	heterogeneous nuclear ribonucleoprotein Q isoform 3 [Homo sapiens]	76.6821	11.57	7	3	5	6	4.66594e+06	527	58.6993	7.56201
	A4	Sequence	# PSMs	# Proteins	# Protein Groups	Protein Group Accessions	Modifications	ΔCn	Area	q-Value	PEP	IonScore	Exp Value	Charge	MH+ [Da]	ΔM [ppm]	RT [min]	# Missed Cleavages
	High	NLANTVTEEILEK	1	7	1	228008398		0	3.39244e+06	0	1.644e-07	58.89	6.0881e-05	2	1473.78	0.833243	63.0039	0
	High	TGYTLDVTTGQR	1	10	2	228008398;5031755		0	9.96445e+06	0	9.363e-10	47.04	0.000741364	2	1311.65	-0.824662	37.6338	0
	High	VTEGLTDVILYHQPDDK	1	7	1	228008398		0	640921	0	6.733e-06	18.73	0.70467	2	1942.98	2.34223	55.2746	0
	High	SAFLcGVMK	1	7	2	228008398;5031755	C5(Carbamidomethyl)	0	487544	0.002	0.008328	11.3	1.87181	2	1012.5	0.638075	49.6572	0
	Medium	GVEAGPDLLQ	2	5	1	228008398		0	386792	0.018	0.1643	21.96	0.185944	1	998.517	1.85337	47.407	0
4506743	40S ribosomal protein S8 [Homo sapiens]	76.4359	25.96	1	4	4	4	5.30093e+06	208	24.1902	10.3159
	A4	Sequence	# PSMs	# Proteins	# Protein Groups	Protein Group Accessions	Modifications	ΔCn	Area	q-Value	PEP	IonScore	Exp Value	Charge	MH+ [Da]	ΔM [ppm]	RT [min]	# Missed Cleavages
	High	ISSLLEEQFQQGK	1	1	1	4506743		0	6.8566e+06	0	3.126e-10	57.59	8.14295e-05	2	1506.78	2.4593	50.2665	0
	High	IIDVVYNASNNELVR	1	1	1	4506743		0	2.95753e+06	0	2.982e-05	46.7	0.00106364	2	1718.91	1.36842	55.1272	0
	High	LDVGNFSWGSEccTR	1	1	1	4506743	C12(Carbamidomethyl); C13(Carbamidomethyl)	0	2.2884e+06	0	0.001838	11.4	1.57203	2	1787.75	0.175138	57.8372	0
	Medium	LTPEEEEILNK	1	1	1	4506743		0	6.08867e+06	0.048	0.5064	13.34	1.69853	2	1314.68	-2.44668	41.8118	0
374671789	single-stranded DNA-binding protein, mitochondrial precursor [Homo sapiens]	76.0346	27.7	1	3	3	3	3.77352e+06	148	17.249	9.59814
	A4	Sequence	# PSMs	# Proteins	# Protein Groups	Protein Group Accessions	Modifications	ΔCn	Area	q-Value	PEP	IonScore	Exp Value	Charge	MH+ [Da]	ΔM [ppm]	RT [min]	# Missed Cleavages
	High	SGDSEVYQLGDVSQK	1	1	1	374671789		0	9.4159e+06	0	1.918e-09	63.16	1.93224e-05	2	1611.75	-0.0309677	40.0794	0
	High	QATTIIADNIIFLSDQTK	1	1	1	374671789		0	1.0724e+06	0	2.344e-14	38.39	0.00534597	2	1992.07	0.483015	67.7521	0
	High	DVAYQYVK	1	1	1	374671789		0	832265	0.001	0.001838	22.32	0.153861	1	985.499	-0.102444	31.1796	0
294459921	ubiquitin-40S ribosomal protein S27a precursor [Homo sapiens]	75.7864	36.54	4	4	4	6	2.65986e+07	156	17.9535	9.64209
	A4	Sequence	# PSMs	# Proteins	# Protein Groups	Protein Group Accessions	Modifications	ΔCn	Area	q-Value	PEP	IonScore	Exp Value	Charge	MH+ [Da]	ΔM [ppm]	RT [min]	# Missed Cleavages
	High	TITLEVEPSDTIENVK	1	4	1	294459921		0	5.60071e+07	0	3.718e-08	49.01	0.000602894	2	1787.93	-0.526923	55.5013	0
	High	ccLTYcFNKPEDK	2	1	1	294459921	C1(Carbamidomethyl); C2(Carbamidomethyl); C6(Carbamidomethyl)	0	6.76523e+06	0	0.0002504	38.11	0.0025883	2	1734.73	-0.0242958	37.7265	0
	High	EcPSDEcGAGVFMASHFDR	2	1	1	294459921	C2(Carbamidomethyl); C7(Carbamidomethyl)	0	1.70235e+07	0	0.0002504	37.72	0.00144533	2	2171.86	1.86883	51.9947	0
	Medium	TLSDYNIQK	1	4	1	294459921		0	569059	0.013	0.1216	12.61	2.14925	1	1081.56	3.54408	29.6792	0
10834982	insulin-like growth factor-binding protein 5 precursor [Homo sapiens]	75.2096	28.68	1	6	6	8	2.00769e+07	272	30.55	8.20654
	A4	Sequence	# PSMs	# Proteins	# Protein Groups	Protein Group Accessions	Modifications	ΔCn	Area	q-Value	PEP	IonScore	Exp Value	Charge	MH+ [Da]	ΔM [ppm]	RT [min]	# Missed Cleavages
	High	HMEASLQELK	1	1	1	10834982		0	2.58586e+07	0	0.0006683	44.05	0.00144433	2	1185.59	-2.147	34.0219	0
	High	FVGGAENTAHPR	1	1	1	10834982		0	6.41493e+06	0	0.0002504	40.22	0.00357427	2	1255.62	-1.67332	17.0458	0
	High	ALSMcPPSPLGcELVK	1	1	1	10834982	C5(Carbamidomethyl); C12(Carbamidomethyl)	0	2.23137e+07	0	0.0002504	36.43	0.0105223	2	1758.86	1.52854	59.9171	0
	High	EPGcGccMTcALAEGQScGVYTER	1	1	1	10834982	C4(Carbamidomethyl); C6(Carbamidomethyl); C7(Carbamidomethyl); C10(Carbamidomethyl); C18(Carbamidomethyl)	0	9.06135e+06	0	1.098e-14	32.57	0.00304343	3	2753.06	1.11163	47.2452	0
	High	GIcWcVDK	2	1	1	10834982	C3(Carbamidomethyl); C5(Carbamidomethyl)	0	1.20585e+07	0.004	0.04033	15.14	0.641481	1	1037.45	0.231869	42.2449	0
	Medium	IISAPEMR	1	1	1	10834982		0	741100	0.013	0.1218	16.59	1.02514	1	916.494	1.80375	33.2973	0
	Medium	HmEASLQELK	1	1	1	10834982	M2(Oxidation)	0	0	0.028	0.2419	14.6	1.14597	2	1201.59	1.19917	30.7238	0
21361657	protein disulfide-isomerase A3 precursor [Homo sapiens]	74.7122	11.68	1	5	5	5	3.70204e+06	505	56.7468	6.354
	A4	Sequence	# PSMs	# Proteins	# Protein Groups	Protein Group Accessions	Modifications	ΔCn	Area	q-Value	PEP	IonScore	Exp Value	Charge	MH+ [Da]	ΔM [ppm]	RT [min]	# Missed Cleavages
	High	MDATANDVPSPYEVR	1	1	1	21361657		0	3.96283e+06	0	9.554e-05	69.94	3.63994e-06	2	1664.76	-0.262537	42.0641	0
	High	LAPEYEAAATR	1	1	1	21361657		0	5.0411e+06	0	0.000245	33.93	0.0191162	2	1191.6	1.76683	29.1225	0
	High	VDcTANTNTcNK	1	1	1	21361657	C3(Carbamidomethyl); C10(Carbamidomethyl)	0	994924	0	0.0002504	20.62	0.123109	2	1397.58	-0.190831	9.21131	0
	High	FVMQEEFSR	1	1	1	21361657		0	2.10219e+06	0.002	0.004352	11.42	1.91454	2	1172.54	0.661865	45.096	0
	High	GFPTIYFSPANK	1	1	1	21361657		0	1.63309e+06	0.002	0.001843	10.92	3.33348	2	1341.68	-1.40043	60.3153	0
333360851	serpin H1 precursor [Homo sapiens]	74.1787	15.79	1	5	5	6	2.24075e+06	418	46.4112	8.68994
	A4	Sequence	# PSMs	# Proteins	# Protein Groups	Protein Group Accessions	Modifications	ΔCn	Area	q-Value	PEP	IonScore	Exp Value	Charge	MH+ [Da]	ΔM [ppm]	RT [min]	# Missed Cleavages
	High	LYGPSSVSFADDFVR	1	1	1	333360851		0	1.69847e+06	0	2.003e-12	51.14	0.000356492	2	1659.81	2.53541	63.0762	0
	High	DTQSGSLLFIGR	1	1	1	333360851		0	4.34907e+06	0	0.0002504	50.18	0.00044756	2	1293.68	1.74164	57.5295	0
	High	SALQSINEWAAQTTDGK	1	1	1	333360851		0	511663	0	3.08e-08	32.8	0.0297303	2	1819.88	-0.488007	59.7048	0
	High	KPAAAAAPGTAEK	2	1	1	333360851		0	0	0.001	0.001838	24.72	0.113666	2	1182.64	-3.1292	9.83462	0
	High	AVLSAEQLR	1	1	1	333360851		0	674719	0.008	0.07543	16.39	1.0413	2	986.564	1.17905	34.8494	0
189181759	electron transfer flavoprotein subunit alpha, mitochondrial isoform b [Homo sapiens]	74.1467	18.66	2	3	3	3	3.49683e+06	284	30.0069	8.57275
	A4	Sequence	# PSMs	# Proteins	# Protein Groups	Protein Group Accessions	Modifications	ΔCn	Area	q-Value	PEP	IonScore	Exp Value	Charge	MH+ [Da]	ΔM [ppm]	RT [min]	# Missed Cleavages
	High	ASSTSPVEISEWLDQK	1	2	1	189181759		0	3.94724e+06	0	4.071e-06	60.73	4.47998e-05	2	1776.87	0.439552	62.8025	0
	High	AAVDAGFVPNDMQVGQTGK	1	2	1	189181759		0	3.15116e+06	0	0.0001437	28.93	0.0638411	2	1904.92	1.0046	49.7521	0
	High	GTSFDAAATSGGSASSEK	1	2	1	189181759		0	3.39209e+06	0	0.0002391	23.82	0.0962693	2	1630.72	0.662985	23.7431	0
34098946	nuclease-sensitive element-binding protein 1 [Homo sapiens]	73.9	11.11	4	2	2	2	2.92948e+06	324	35.9027	9.87646
	A4	Sequence	# PSMs	# Proteins	# Protein Groups	Protein Group Accessions	Modifications	ΔCn	Area	q-Value	PEP	IonScore	Exp Value	Charge	MH+ [Da]	ΔM [ppm]	RT [min]	# Missed Cleavages
	High	SVGDGETVEFDVVEGEK	1	4	1	34098946		0	2.62279e+06	0	1.794e-07	53.45	0.000196783	2	1795.82	-2.87806	51.0785	0
	High	GAEAANVTGPGGVPVQGSK	1	1	1	34098946		0	3.23617e+06	0	6.491e-07	47.45	0.000868855	2	1695.87	1.29281	30.1904	0
118582269	serine/arginine-rich splicing factor 1 isoform 2 [Homo sapiens]	73.7754	21.39	2	5	5	6	4.30151e+06	201	22.446	7.94287
	A4	Sequence	# PSMs	# Proteins	# Protein Groups	Protein Group Accessions	Modifications	ΔCn	Area	q-Value	PEP	IonScore	Exp Value	Charge	MH+ [Da]	ΔM [ppm]	RT [min]	# Missed Cleavages
	High	EAGDVcYADVYR	1	2	1	118582269	C6(Carbamidomethyl)	0	5.6511e+06	0	0.0002504	48.09	0.000270115	2	1417.61	0.0627667	38.6229	0
	High	DIEDVFYK	1	2	1	118582269		0	739295	0	0.0002504	44.1	0.000830611	1	1028.49	-0.366777	51.6207	0
	High	TKDIEDVFYK	1	2	1	118582269		0	1.44112e+06	0.001	0.001838	35.32	0.011354	2	1257.63	-1.19283	43.446	1
	High	DGTGVVEFVR	1	2	1	118582269		0	5.81231e+06	0.001	0.001838	17.24	0.880748	2	1078.55	1.21779	45.0028	0
	High	IYVGNLPPDIR	2	2	1	118582269		0	825915	0.004	0.03834	20.61	0.273723	2	1256.7	0.157134	52.6577	0
4758792	NADH dehydrogenase [ubiquinone] iron-sulfur protein 6, mitochondrial precursor [Homo sapiens]	73.1694	50	1	4	4	5	6.11464e+06	124	13.7028	8.27979
	A4	Sequence	# PSMs	# Proteins	# Protein Groups	Protein Group Accessions	Modifications	ΔCn	Area	q-Value	PEP	IonScore	Exp Value	Charge	MH+ [Da]	ΔM [ppm]	RT [min]	# Missed Cleavages
	High	TGTcGYcGLQFR	1	1	1	4758792	C4(Carbamidomethyl); C7(Carbamidomethyl)	0	8.13107e+06	0	0.0002504	41.51	0.00143736	2	1419.62	2.57836	43.866	0
	High	VIAcDGGGGALGHPK	2	1	1	4758792	C4(Carbamidomethyl)	0	7.35766e+06	0	5.723e-10	40.26	0.00474712	2	1408.7	1.99136	22.5258	0
	High	QKEVNENFAIDLIAEQPVSEVETR	1	1	1	4758792		0	2.53119e+06	0	0.0002601	34.13	0.0175797	3	2758.4	3.6688	63.8837	1
	High	VTHTGQVYDDK	1	1	1	4758792		0	2.85519e+06	0.009	0.09518	22.61	0.192993	2	1262.6	-4.40572	13.2552	0
306482694	serine/arginine-rich splicing factor 7 isoform 2 [Homo sapiens]	73.0883	22.57	2	4	5	5	1.25867e+07	226	25.9963	11.7661
	A4	Sequence	# PSMs	# Proteins	# Protein Groups	Protein Group Accessions	Modifications	ΔCn	Area	q-Value	PEP	IonScore	Exp Value	Charge	MH+ [Da]	ΔM [ppm]	RT [min]	# Missed Cleavages
	High	VYVGNLGTGAGK	1	2	1	306482694		0	9.10404e+06	0	1.457e-12	59.36	4.85528e-05	2	1135.61	0.530422	31.8902	0
	High	NPPGFAFVEFEDPR	1	3	2	4506901;306482694		0	2.61907e+07	0	8.375e-08	42.29	0.00254377	2	1621.76	0.0460833	64.4077	0
	High	NPPGFAFVEFEDPRDAEDAVR	1	2	1	306482694		0	2.46551e+06	0	0.001838	19.83	0.52308	3	2378.11	1.09993	63.7521	1
	High	VELSTGMPR	1	2	1	306482694		0	0	0.002	0.001838	21.92	0.310418	2	989.509	0.462281	33.6909	0
	High	GHYAYDcHR	1	2	1	306482694	C7(Carbamidomethyl)	0	701854	0.003	0.03242	13.96	0.423889	3	1178.48	-0.101383	11.694	0
42516576	glutaredoxin-related protein 5, mitochondrial precursor [Homo sapiens]	73.04	8.92	1	1	1	1	1.76083e+06	157	16.6175	6.78564
	A4	Sequence	# PSMs	# Proteins	# Protein Groups	Protein Group Accessions	Modifications	ΔCn	Area	q-Value	PEP	IonScore	Exp Value	Charge	MH+ [Da]	ΔM [ppm]	RT [min]	# Missed Cleavages
	High	DYAAYNVLDDPELR	1	1	1	42516576		0	1.76083e+06	0	1.201e-10	73.04	1.87712e-06	2	1653.78	-0.289814	59.6875	0
4758950	peptidyl-prolyl cis-trans isomerase B precursor [Homo sapiens]	72.4428	17.13	1	3	3	3	5.05129e+06	216	23.7275	9.40771
	A4	Sequence	# PSMs	# Proteins	# Protein Groups	Protein Group Accessions	Modifications	ΔCn	Area	q-Value	PEP	IonScore	Exp Value	Charge	MH+ [Da]	ΔM [ppm]	RT [min]	# Missed Cleavages
	High	TVDNFVALATGEK	1	1	1	4758950		0	8.04907e+06	0	5.588e-15	77.48	8.79845e-07	2	1364.71	0.0328095	58.0635	0
	High	DTNGSQFFITTVK	1	1	1	4758950		0	5.29954e+06	0.001	0.001838	19.43	0.466932	2	1457.73	0.640478	54.4782	0
	High	DFMIQGGDFTR	1	1	1	4758950		0	1.80527e+06	0.004	0.03716	19.63	0.249365	2	1286.58	-1.17717	53.6744	0
55770830	E3 SUMO-protein ligase CBX4 [Homo sapiens]	72.4128	20.18	1	8	8	9	6.393e+06	560	61.3295	9.36377
	A4	Sequence	# PSMs	# Proteins	# Protein Groups	Protein Group Accessions	Modifications	ΔCn	Area	q-Value	PEP	IonScore	Exp Value	Charge	MH+ [Da]	ΔM [ppm]	RT [min]	# Missed Cleavages
	High	EAPSPTcPDLGAK	1	1	1	55770830	C7(Carbamidomethyl)	0	9.60839e+06	0	2.29e-08	61.18	2.80064e-05	2	1342.63	2.25032	28.891	0
	High	YNTWEPEENILDPR	1	1	1	55770830		0	7.52784e+06	0	3.499e-09	28.99	0.0556466	2	1775.83	2.59107	59.9221	0
	High	mELPAVGEHVFAVESIEK	1	1	1	55770830	N-Term(Acetyl); M1(Oxidation)	0	333198	0	0.0002832	24.83	0.182348	2	2043.01	1.90822	64.2978	0
	High	MYDLQYQGGHK	1	1	1	55770830		0	2.04276e+06	0	0.0002504	23.27	0.156835	2	1339.61	0.403051	30.9683	0
	High	mELPAVGEHVFAVESIEK	1	1	1	55770830	N-Term(Acetyl)	0	1.88349e+06	0	0.001093	21.7	0.367451	3	2027.02	1.30502	68.8809	0
	High	EAFGEQPLQLTTKPDLLAWDPAR	1	1	1	55770830		0	1.20945e+06	0	0.0002042	10.8	3.97999	3	2596.34	-1.84902	66.6475	0
	High	GYLGAVKPLAGAAGAPGK	1	1	1	55770830		0	940944	0.001	0.001838	23.36	0.0934168	2	1597.9	-0.977959	43.3975	0
	High	SNVLTGLQDSSTDNR	1	1	1	55770830		0	308841	0.002	0.01345	13.63	2.06134	2	1606.77	1.89305	40.6605	0
	Medium	RSNVLTGLQDSSTDNR	1	1	1	55770830		0	717089	0.023	0.2419	23.29	0.26066	3	1762.87	1.62258	33.1562	1
55956788	nucleolin [Homo sapiens]	71.813	9.3	1	6	6	6	2.86764e+06	710	76.5684	4.70361
	A4	Sequence	# PSMs	# Proteins	# Protein Groups	Protein Group Accessions	Modifications	ΔCn	Area	q-Value	PEP	IonScore	Exp Value	Charge	MH+ [Da]	ΔM [ppm]	RT [min]	# Missed Cleavages
	High	FGYVDFESAEDLEK	1	1	1	55956788		0	854581	0	1.353e-11	48.44	0.000422495	2	1648.74	1.14653	60.5848	0
	High	GFGFVDFNSEEDAK	1	1	1	55956788		0	4.14347e+06	0	1.206e-14	48.33	0.000284972	2	1561.68	0.92409	59.5389	0
	High	EVFEDAAEIR	1	1	1	55956788		0	2.75281e+06	0.001	0.001838	30.37	0.0426106	2	1178.57	0.132385	42.1121	0
	High	TGISDVFAK	1	1	1	55956788		0	1.44384e+06	0.002	0.001838	27.29	0.0641101	2	937.499	0.562115	44.1764	0
	High	GLSEDTTEETLK	1	1	1	55956788		0	0	0.002	0.002132	14.6	1.57939	2	1322.63	0.560147	30.7216	0
	High	LELQGPR	1	1	1	55956788		0	1.70663e+06	0.004	0.04102	25.28	0.047882	2	812.462	-1.21469	28.141	0
57013276	tubulin alpha-1B chain [Homo sapiens]	71.2402	14.41	12	5	5	7	8.09934e+06	451	50.1196	5.05908
	A4	Sequence	# PSMs	# Proteins	# Protein Groups	Protein Group Accessions	Modifications	ΔCn	Area	q-Value	PEP	IonScore	Exp Value	Charge	MH+ [Da]	ΔM [ppm]	RT [min]	# Missed Cleavages
	High	AVFVDLEPTVIDEVR	1	4	1	57013276		0	1.25828e+07	0	8.031e-11	52.05	0.000279433	2	1701.91	1.32637	65.7026	0
	High	SIQFVDWcPTGFK	1	3	1	57013276	C8(Carbamidomethyl)	0	1.84007e+06	0	0.0001899	49.36	0.000472202	2	1584.75	-0.283368	64.8049	0
	High	VGINYQPPTVVPGGDLAK	2	10	1	57013276		0	8.77734e+06	0	0.0003685	20.92	0.276306	2	1824.98	-0.663442	55.5058	0
	High	DVNAAIATIK	2	6	1	57013276		0	2.93783e+06	0.001	0.001838	23.09	0.209618	2	1015.58	0.724504	40.2623	0
	High	YMAccLLYR	1	8	1	57013276	C4(Carbamidomethyl); C5(Carbamidomethyl)	0	1.16134e+06	0.003	0.03023	15.03	0.731739	2	1249.56	3.41166	50.1958	0
17402900	far upstream element-binding protein 1 [Homo sapiens]	71.0186	5.12	1	2	2	2	2.45857e+06	644	67.5185	7.60596
	A4	Sequence	# PSMs	# Proteins	# Protein Groups	Protein Group Accessions	Modifications	ΔCn	Area	q-Value	PEP	IonScore	Exp Value	Charge	MH+ [Da]	ΔM [ppm]	RT [min]	# Missed Cleavages
	High	IGGNEGIDVPIPR	1	1	1	17402900		0	3.8537e+06	0	2.228e-11	54.38	0.000112527	2	1336.72	1.24118	51.8503	0
	High	IGGDAGTSLNSNDYGYGGQK	1	1	1	17402900		0	1.06345e+06	0	7.1e-14	40.09	0.00336455	2	1973.88	-2.05033	35.7799	0
331999954	keratin, type II cytoskeletal 4 [Homo sapiens]	70.877	6.92	6	1	4	9	5.98057e+07	520	56.1093	6.60986
	A4	Sequence	# PSMs	# Proteins	# Protein Groups	Protein Group Accessions	Modifications	ΔCn	Area	q-Value	PEP	IonScore	Exp Value	Charge	MH+ [Da]	ΔM [ppm]	RT [min]	# Missed Cleavages
	High	LALDIEIATYR	2	10	4	119395750;125628632;331999954;372466577		0	1.41478e+07	0	4.892e-06	51.83	0.000189298	2	1277.71	2.84833	63.0594	0
	High	AQYEEIAQR	3	6	4	47132620;119703753;5031839;331999954		0	1.33623e+08	0	0.0002504	47.33	0.000726763	2	1107.54	-0.271919	25.0302	0
	High	VQFLEQQNK	1	1	1	331999954		0	2.86518e+06	0.001	0.001838	27.2	0.0871748	2	1133.6	1.10066	32.3189	0
	High	FASFIDK	3	20	9	47132620;28173564;119703753;5031839;119395754;109148552;194018511;331999954;372466577		0	3.1646e+07	0.002	0.01203	23.81	0.0971151	2	827.43	0.04335	40.8821	0
5031973	protein disulfide-isomerase A6 precursor [Homo sapiens]	70.847	17.95	1	5	5	5	9.68331e+06	440	48.0913	5.08447
	A4	Sequence	# PSMs	# Proteins	# Protein Groups	Protein Group Accessions	Modifications	ΔCn	Area	q-Value	PEP	IonScore	Exp Value	Charge	MH+ [Da]	ΔM [ppm]	RT [min]	# Missed Cleavages
	High	NLEPEWAAAASEVK	1	1	1	5031973		0	1.13781e+07	0	5.231e-05	43.88	0.00178028	2	1514.75	-2.3691	56.0722	0
	High	GSTAPVGGGAFPTIVER	1	1	1	5031973		0	1.60384e+07	0	0.001838	25	0.162541	2	1615.84	-0.919938	53.0008	0
	High	DGELPVEDDIDLSDVELDDLGKDEL	1	1	1	5031973		0	513457	0.001	0.001838	31.48	0.0351695	3	2758.27	1.98575	69.8194	1
	High	DVIELTDDSFDK	1	1	1	5031973		0	1.63344e+06	0.001	0.001838	15.91	1.0399	2	1396.64	-2.20408	53.6574	0
	High	GESPVDYDGGR	1	1	1	5031973		0	1.60163e+06	0.002	0.001838	42.48	0.00125698	2	1151.5	0.0835953	23.9925	0
62122917	filaggrin-2 [Homo sapiens]	70.6991	3.09	1	5	5	6	2.80329e+06	2391	247.928	8.30908
	A4	Sequence	# PSMs	# Proteins	# Protein Groups	Protein Group Accessions	Modifications	ΔCn	Area	q-Value	PEP	IonScore	Exp Value	Charge	MH+ [Da]	ΔM [ppm]	RT [min]	# Missed Cleavages
	High	FSNSSSSNEFSK	1	1	1	62122917		0	5.40519e+06	0	0.0002504	48.49	0.000235022	2	1320.57	0.514285	21.534	0
	High	QSSYGQHGSGSSQSSGYGQYGSR	1	1	1	62122917		0	1.94989e+06	0	2.873e-08	39.31	0.00233267	3	2351.99	1.14414	20.3811	0
	High	LETTHGQTGDTTR	1	1	1	62122917		0	1.05479e+06	0	0.0002504	30.41	0.0290717	2	1416.67	-3.43044	9.944	0
	High	HGTIHGQTGDTTR	2	1	1	62122917		0	317803	0	0.001838	12.7	2.51868	2	1380.66	0.644484	6.80358	0
	High	ENGQPQNcGGQWR	1	1	1	62122917	C8(Carbamidomethyl)	0	815192	0.002	0.002193	18.5	0.271207	2	1530.65	1.27657	21.2914	0
11559927	28S ribosomal protein S14, mitochondrial [Homo sapiens]	70.69	11.72	1	1	1	1	1.50297e+07	128	15.129	11.4146
	A4	Sequence	# PSMs	# Proteins	# Protein Groups	Protein Group Accessions	Modifications	ΔCn	Area	q-Value	PEP	IonScore	Exp Value	Charge	MH+ [Da]	ΔM [ppm]	RT [min]	# Missed Cleavages
	High	ILQDVADEEIAALPR	1	1	1	11559927		0	1.50297e+07	0	6.154e-16	70.69	3.2759e-06	2	1652.88	-0.69355	60.4469	0
18104948	60S ribosomal protein L21 [Homo sapiens]	70.42	29.38	1	4	4	4	1.76292e+06	160	18.5531	10.4917
	A4	Sequence	# PSMs	# Proteins	# Protein Groups	Protein Group Accessions	Modifications	ΔCn	Area	q-Value	PEP	IonScore	Exp Value	Charge	MH+ [Da]	ΔM [ppm]	RT [min]	# Missed Cleavages
	High	VYNVTQHAVGIVVNK	1	1	1	18104948		0	1.28053e+06	0	2.56e-15	70.42	2.29225e-06	2	1640.91	1.33389	43.7596	0
	High	EPELLEPIPYEFmA	1	1	1	18104948	M13(Oxidation)	0	814930	0.003	0.02028	26.93	0.107467	2	1693.8	1.00295	69.2949	0
	Medium	GTWVQLK	1	1	1	18104948		0	1.8182e+06	0.016	0.1426	19.26	0.648023	1	831.473	1.17424	40.771	0
	Medium	HGVVPLATYMR	1	1	1	18104948		0	2.19004e+06	0.018	0.1676	17.61	0.697856	2	1243.66	0.90541	46.7413	0
315221152	60S ribosomal protein L11 isoform 2 [Homo sapiens]	70.1698	17.51	2	3	3	3	3.14129e+06	177	20.1116	9.59814
	A4	Sequence	# PSMs	# Proteins	# Protein Groups	Protein Group Accessions	Modifications	ΔCn	Area	q-Value	PEP	IonScore	Exp Value	Charge	MH+ [Da]	ΔM [ppm]	RT [min]	# Missed Cleavages
	High	VLEQLTGQTPVFSK	1	2	1	315221152		0	3.84192e+06	0	8.369e-08	65.96	8.36592e-06	2	1546.85	1.88135	51.9757	0
	High	YDGIILPGK	1	2	1	315221152		0	3.79611e+06	0	0.0004653	32.74	0.0204862	2	975.551	-0.0516436	45.2435	0
	High	IAVHcTVR	1	2	1	315221152	C5(Carbamidomethyl)	0	1.78584e+06	0.003	0.02332	18.31	0.314325	2	955.512	-1.88126	17.0704	0
379317177	nucleolar RNA helicase 2 isoform 2 [Homo sapiens]	69.3715	5.59	2	3	3	3	1.63971e+06	715	79.6074	9.37842
	A4	Sequence	# PSMs	# Proteins	# Protein Groups	Protein Group Accessions	Modifications	ΔCn	Area	q-Value	PEP	IonScore	Exp Value	Charge	MH+ [Da]	ΔM [ppm]	RT [min]	# Missed Cleavages
	High	APQVLVLAPTR	1	2	1	379317177		0	3.59312e+06	0	0.0002504	52.69	3.49875e-05	2	1164.71	1.38588	47.7917	0
	High	TAITVEHLAIK	1	2	1	379317177		0	683480	0	0.0001886	39.44	0.00155855	2	1195.71	0.480406	42.4177	0
	High	LGVcFDVPTASVTEIQEK	1	2	1	379317177	C4(Carbamidomethyl)	0	642520	0	2.87e-06	20.56	0.501482	2	1992.99	0.0166961	61.7582	0
73760405	thymopoietin isoform beta [Homo sapiens]	68.7403	21.15	2	1	6	6	5.43306e+06	454	50.6395	9.37842
	A4	Sequence	# PSMs	# Proteins	# Protein Groups	Protein Group Accessions	Modifications	ΔCn	Area	q-Value	PEP	IonScore	Exp Value	Charge	MH+ [Da]	ΔM [ppm]	RT [min]	# Missed Cleavages
	High	SSTPLPTISSSAENTR	1	3	2	4507555;73760405		0	6.1133e+06	0	6.718e-08	44.8	0.00180632	2	1647.82	-0.415506	39.3015	0
	High	NRPPLPAGTNSK	1	3	2	4507555;73760405		0	2.89278e+06	0	0.0002504	38.52	0.00520238	2	1251.68	0.582131	18.2681	0
	High	PEFLEDPSVLTK	1	3	2	4507555;73760405		0	4.72301e+06	0	0.0002504	29.23	0.0593412	2	1374.72	0.136996	56.6044	0
	High	IDGPVISESTPIAETIMASSNESLVVNR	1	1	1	73760405		0	859869	0	9.006e-10	18.42	0.799253	3	2929.48	-0.578347	68.4934	0
	High	YGVNPGPIVGTTR	1	3	2	4507555;73760405		0	5.46289e+06	0.001	0.001838	38.2	0.00727266	2	1330.71	1.13242	40.479	0
	High	EPTPVLGSGAAAAGR	1	3	2	4507555;73760405		0	2.97465e+06	0.002	0.005905	20.36	0.345629	2	1353.71	0.822282	32.3233	0
11415026	60S ribosomal protein L18a [Homo sapiens]	68.6757	15.34	1	2	2	2	3.65745e+06	176	20.7489	10.7114
	A4	Sequence	# PSMs	# Proteins	# Protein Groups	Protein Group Accessions	Modifications	ΔCn	Area	q-Value	PEP	IonScore	Exp Value	Charge	MH+ [Da]	ΔM [ppm]	RT [min]	# Missed Cleavages
	High	SSGEIVYcGQVFEK	1	1	1	11415026	C8(Carbamidomethyl)	0	2.67819e+06	0	0.0002504	54.52	0.000138624	2	1602.75	1.28134	46.5902	0
	High	DLTTAGAVTQcYR	1	1	1	11415026	C11(Carbamidomethyl)	0	4.63672e+06	0	0.0002504	43.35	0.00203216	2	1455.69	0.698038	37.3917	0
4503049	cysteine-rich protein 2 isoform 1 [Homo sapiens]	68.36	7.69	2	1	1	2	1.42686e+07	208	22.478	8.71924
	A4	Sequence	# PSMs	# Proteins	# Protein Groups	Protein Group Accessions	Modifications	ΔCn	Area	q-Value	PEP	IonScore	Exp Value	Charge	MH+ [Da]	ΔM [ppm]	RT [min]	# Missed Cleavages
	High	ASSVTTFTGEPNTcPR	2	2	1	4503049	C14(Carbamidomethyl)	0	1.42686e+07	0	2.166e-11	49.85	0.000432689	2	1724.79	-1.60122	35.392	0
323276700	40S ribosomal protein S10 [Homo sapiens]	68.35	8.48	1	1	1	1	8.84724e+06	165	18.8859	10.1548
	A4	Sequence	# PSMs	# Proteins	# Protein Groups	Protein Group Accessions	Modifications	ΔCn	Area	q-Value	PEP	IonScore	Exp Value	Charge	MH+ [Da]	ΔM [ppm]	RT [min]	# Missed Cleavages
	High	AEAGAGSATEFQFR	1	1	1	323276700		0	8.84724e+06	0	2.661e-13	68.35	4.7667e-06	2	1441.67	-1.19194	42.8812	0
4502419	flavin reductase (NADPH) [Homo sapiens]	68.25	18.93	1	3	3	3	1.97467e+06	206	22.1054	7.6499
	A4	Sequence	# PSMs	# Proteins	# Protein Groups	Protein Group Accessions	Modifications	ΔCn	Area	q-Value	PEP	IonScore	Exp Value	Charge	MH+ [Da]	ΔM [ppm]	RT [min]	# Missed Cleavages
	High	TVAGQDAVIVLLGTR	1	1	1	4502419		0	725841	0	8.164e-10	68.25	2.99995e-06	2	1512.88	1.24866	64.9414	0
	High	NDLSPTTVMSEGAR	1	1	1	4502419		0	3.82255e+06	0	0.001838	26.07	0.0989926	2	1477.69	-0.147129	42.2133	0
	High	LQAVTDDHIR	1	1	1	4502419		0	1.37563e+06	0	0.0002504	22.41	0.203524	2	1167.61	-0.81014	24.7901	0
11225260	DNA topoisomerase 1 [Homo sapiens]	67.9095	9.54	3	6	6	6	3.53112e+06	765	90.6689	9.30518
	A4	Sequence	# PSMs	# Proteins	# Protein Groups	Protein Group Accessions	Modifications	ΔCn	Area	q-Value	PEP	IonScore	Exp Value	Charge	MH+ [Da]	ΔM [ppm]	RT [min]	# Missed Cleavages
	High	EEGETADTVGccSLR	1	1	1	11225260	C11(Carbamidomethyl); C12(Carbamidomethyl)	0	825315	0	4.421e-07	48.42	0.000222294	2	1683.7	0.963061	29.4725	0
	High	AVAILcNHQR	1	1	1	11225260	C6(Carbamidomethyl)	0	1.90845e+06	0	0.0001154	42.04	0.00254133	2	1181.62	-0.050915	25.1689	0
	High	IMPEDIIINcSK	1	1	1	11225260	C10(Carbamidomethyl)	0	3.05345e+06	0	0.001303	22.37	0.279574	2	1432.71	-1.92364	55.9358	0
	High	GPVFAPPYEPLPENVK	1	1	1	11225260		0	5.63145e+06	0	0.0002504	22.11	0.269447	2	1753.92	0.0182014	59.2651	0
	High	cDFTQMSQYFK	1	1	1	11225260	C1(Carbamidomethyl)	0	521057	0.002	0.003183	21.94	0.0994788	2	1454.61	-1.41808	59.7287	0
	Medium	AVALYFIDK	1	3	1	11225260		0	1.30595e+06	0.013	0.1215	20.82	0.175524	2	1039.58	-0.331404	58.2376	0
313569776	60S ribosomal protein L17 isoform a [Homo sapiens]	67.876	21.74	4	3	3	3	1.03158e+07	184	21.3833	10.1694
	A4	Sequence	# PSMs	# Proteins	# Protein Groups	Protein Group Accessions	Modifications	ΔCn	Area	q-Value	PEP	IonScore	Exp Value	Charge	MH+ [Da]	ΔM [ppm]	RT [min]	# Missed Cleavages
	High	GLDVDSLVIEHIQVNK	1	4	1	313569776		0	1.97458e+06	0	1.58e-13	60.86	2.59231e-05	2	1778.96	0.0674824	62.1512	0
	High	EQIVPKPEEEVAQK	1	4	1	313569776		0	1.1189e+07	0	0.0002504	35.57	0.0112735	2	1623.86	1.0666	30.597	0
	Medium	YSLDPENPTK	1	2	1	313569776		0	1.77838e+07	0.017	0.1541	12.94	2.01993	2	1163.56	-0.648696	35.2996	0
66346730	creatine kinase U-type, mitochondrial precursor [Homo sapiens]	67.8184	10.55	3	3	3	3	1.90727e+06	417	47.0072	8.33838
	A4	Sequence	# PSMs	# Proteins	# Protein Groups	Protein Group Accessions	Modifications	ΔCn	Area	q-Value	PEP	IonScore	Exp Value	Charge	MH+ [Da]	ΔM [ppm]	RT [min]	# Missed Cleavages
	High	GTGGVDTAATGGVFDISNLDR	1	3	1	66346730		0	1.35322e+06	0	5.76e-16	61.24	4.31807e-05	2	2022.97	0.374222	61.1139	0
	High	VVVDALSGLK	1	1	1	66346730		0	2.46133e+06	0.001	0.001838	30.44	0.026748	2	1000.6	1.00202	48.5853	0
	High	SFLIWVNEEDHTR	1	2	1	66346730		0	0	0.002	0.001877	11.64	2.97159	2	1645.8	0.273168	61.5458	0
5174449	histone H1x [Homo sapiens]	67.6168	14.08	1	2	2	2	2.68718e+06	213	22.4735	10.7554
	A4	Sequence	# PSMs	# Proteins	# Protein Groups	Protein Group Accessions	Modifications	ΔCn	Area	q-Value	PEP	IonScore	Exp Value	Charge	MH+ [Da]	ΔM [ppm]	RT [min]	# Missed Cleavages
	High	ALVQNDTLLQVK	1	1	1	5174449		0	3.62953e+06	0	0.0002504	49.02	0.000330829	2	1341.77	0.38473	49.8761	0
	High	sVELEEALPVTTAEGMAK	1	1	1	5174449	N-Term(Acetyl)	0	1.74484e+06	0	0.0002504	40.71	0.00433931	2	1916.96	1.50208	65.5893	0
149999611	signal recognition particle 14 kDa protein [Homo sapiens]	67.2956	19.85	1	2	2	2	1.18695e+06	136	14.5608	10.0376
	A4	Sequence	# PSMs	# Proteins	# Protein Groups	Protein Group Accessions	Modifications	ΔCn	Area	q-Value	PEP	IonScore	Exp Value	Charge	MH+ [Da]	ΔM [ppm]	RT [min]	# Missed Cleavages
	High	VLLESEQFLTELTR	1	1	1	149999611		0	1.07104e+06	0	6.141e-12	67.93	6.49896e-06	2	1677.91	1.21175	68.3687	0
	High	KGTVEGFEPADNK	1	1	1	149999611		0	1.30287e+06	0.002	0.008333	26.4	0.1142	2	1391.68	-1.21932	24.3465	1
5031987	peptidyl-prolyl cis-trans isomerase F, mitochondrial precursor [Homo sapiens]	67.1749	13.04	4	4	4	6	8.95316e+06	207	22.0262	9.37842
	A4	Sequence	# PSMs	# Proteins	# Protein Groups	Protein Group Accessions	Modifications	ΔCn	Area	q-Value	PEP	IonScore	Exp Value	Charge	MH+ [Da]	ΔM [ppm]	RT [min]	# Missed Cleavages
	High	FPDENFTLK	3	1	1	5031987		0	1.81527e+07	0	0.001838	36.59	0.00866158	2	1110.55	1.34348	50.0333	0
	High	KIVITDcGQLS	1	1	1	5031987	C7(Carbamidomethyl)	0	7.26422e+06	0.001	0.001838	41.6	0.00307519	2	1233.65	0.29615	38.4877	1
	Medium	IVITDcGQLS	1	1	1	5031987	C6(Carbamidomethyl)	0	1.4426e+06	0.011	0.1081	10.19	4.5036	1	1105.55	-2.14236	42.7515	0
	Medium	TDWLDGK	1	4	1	5031987		0	1.03588e+06	0.025	0.2419	22.79	0.222505	1	834.399	0.0487802	36.2476	0
21956645	myotrophin [Homo sapiens]	67.12	14.41	1	1	1	1	4.71398e+06	118	12.8866	5.51611
	A4	Sequence	# PSMs	# Proteins	# Protein Groups	Protein Group Accessions	Modifications	ΔCn	Area	q-Value	PEP	IonScore	Exp Value	Charge	MH+ [Da]	ΔM [ppm]	RT [min]	# Missed Cleavages
	High	GPDGLTAFEATDNQAIK	1	1	1	21956645		0	4.71398e+06	0	4.206e-16	67.12	1.02576e-05	2	1747.85	0.959308	50.95	0
62739173	mRNA export factor [Homo sapiens]	67.107	11.96	1	4	4	4	1.67391e+06	368	40.9419	7.82568
	A4	Sequence	# PSMs	# Proteins	# Protein Groups	Protein Group Accessions	Modifications	ΔCn	Area	q-Value	PEP	IonScore	Exp Value	Charge	MH+ [Da]	ΔM [ppm]	RT [min]	# Missed Cleavages
	High	NAAEELKPR	1	1	1	62739173		0	2.35887e+06	0	0.0002504	51.86	0.000161278	2	1027.55	0.600685	17.6057	0
	High	SSNPMMVLQLPER	1	1	1	62739173		0	1.1057e+06	0	0.0002504	43.14	0.00215468	2	1501.75	0.690528	61.5895	0
	High	cWEVQDSGQTIPK	1	1	1	62739173	C1(Carbamidomethyl)	0	1.32467e+06	0	0.0002504	28.8	0.0478527	2	1547.72	1.61275	41.3207	0
	High	GHEFYNPQK	1	1	1	62739173		0	1.33818e+06	0.002	0.002278	14.57	1.1155	2	1119.52	-0.0314292	21.5524	0
311771545	RBM14-RBM4 protein isoform 1 [Homo sapiens]	66.99	9.44	5	1	2	2	1.19062e+06	339	37.0111	8.48486
	A4	Sequence	# PSMs	# Proteins	# Protein Groups	Protein Group Accessions	Modifications	ΔCn	Area	q-Value	PEP	IonScore	Exp Value	Charge	MH+ [Da]	ΔM [ppm]	RT [min]	# Missed Cleavages
	High	IFVGNVSAAcTSQELR	1	5	2	5454064;311771545	C10(Carbamidomethyl)	0	1.40038e+06	0	2.431e-12	45.24	0.00152007	2	1751.88	0.478635	47.9471	0
	High	VADLTEQYNEQYGAVR	1	2	1	311771545		0	980866	0	1.271e-14	39.75	0.00494142	2	1855.88	0.716182	42.3785	0
83715985	3-hydroxyacyl-CoA dehydrogenase type-2 isoform 2 [Homo sapiens]	66.6283	15.87	2	2	2	2	856957	252	25.9676	7.21045
	A4	Sequence	# PSMs	# Proteins	# Protein Groups	Protein Group Accessions	Modifications	ΔCn	Area	q-Value	PEP	IonScore	Exp Value	Charge	MH+ [Da]	ΔM [ppm]	RT [min]	# Missed Cleavages
	High	LVAGEMGQNEPDQGGQR	1	2	1	83715985		0	1.29763e+06	0	1.446e-13	55.81	0.000106543	2	1785.82	-0.00686292	26.7591	0
	High	LVGQGASAVLLDLPNSGGEAQAK	1	2	1	83715985		0	416288	0	0.0002262	39.49	0.00375618	2	2195.17	0.349298	60.2808	0
5031579	A-kinase anchor protein 8 [Homo sapiens]	66.37	2.89	1	1	1	1	1.42671e+06	692	76.0611	5.14795
	A4	Sequence	# PSMs	# Proteins	# Protein Groups	Protein Group Accessions	Modifications	ΔCn	Area	q-Value	PEP	IonScore	Exp Value	Charge	MH+ [Da]	ΔM [ppm]	RT [min]	# Missed Cleavages
	High	VAPAPAAADAEVEQTDAESK	1	1	1	5031579		0	1.42671e+06	0	4.206e-16	66.37	1.16491e-05	2	1969.94	1.22046	33.4056	0
4758304	protein disulfide-isomerase A4 precursor [Homo sapiens]	66.2627	12.87	1	5	5	6	1.95175e+06	645	72.887	5.07178
	A4	Sequence	# PSMs	# Proteins	# Protein Groups	Protein Group Accessions	Modifications	ΔCn	Area	q-Value	PEP	IonScore	Exp Value	Charge	MH+ [Da]	ΔM [ppm]	RT [min]	# Missed Cleavages
	High	DLGLSESGEDVNAAILDESGK	1	1	1	4758304		0	393890	0	4.206e-16	46.44	0.00114628	2	2119.01	0.864336	58.774	0
	High	FDVSGYPTLK	2	1	1	4758304		0	1.96233e+06	0	0.0002504	37.01	0.00691759	2	1126.58	1.83063	47.1109	0
	High	VSQGQLVVMQPEK	1	1	1	4758304		0	1.9306e+06	0	0.0002504	34.81	0.0141894	2	1442.77	0.851776	39.5623	0
	High	FAMEPEEFDSDTLR	1	1	1	4758304		0	1.18711e+06	0	1.063e-06	26.35	0.0652347	2	1686.73	1.34166	57.8445	0
	High	VEGFPTIYFAPSGDK	1	1	1	4758304		0	1.07185e+06	0	0.0004355	17.77	0.878994	2	1627.8	-1.11303	63.2279	0
189083692	fructose-1,6-bisphosphatase 1 [Homo sapiens]	66.23	7.99	1	2	2	2	2.25546e+06	338	36.8188	6.99072
	A4	Sequence	# PSMs	# Proteins	# Protein Groups	Protein Group Accessions	Modifications	ΔCn	Area	q-Value	PEP	IonScore	Exp Value	Charge	MH+ [Da]	ΔM [ppm]	RT [min]	# Missed Cleavages
	High	DFDPAVTEYIQR	1	1	1	189083692		0	2.09445e+06	0	0.0002504	51.32	0.000328736	2	1453.7	2.27212	55.244	0
	High	aDQAPFDTDVNTLTR	1	1	1	189083692	N-Term(Acetyl)	0	2.41647e+06	0	1.084e-05	41.91	0.00311778	2	1705.8	-1.03958	57.7116	0
5031877	lamin-B1 isoform 1 [Homo sapiens]	65.7976	8.53	2	4	4	4	2.04673e+06	586	66.3676	5.16064
	A4	Sequence	# PSMs	# Proteins	# Protein Groups	Protein Group Accessions	Modifications	ΔCn	Area	q-Value	PEP	IonScore	Exp Value	Charge	MH+ [Da]	ΔM [ppm]	RT [min]	# Missed Cleavages
	High	SLETENSALQLQVTER	1	1	1	5031877		0	1.8958e+06	0	2.062e-05	49.48	0.000642503	2	1817.92	0.457107	48.6015	0
	High	ALYETELADAR	1	1	1	5031877		0	2.45176e+06	0	0.0002504	43.48	0.00192063	2	1251.62	-0.375474	42.002	0
	High	IQELEDLLAK	1	2	1	5031877		0	1.79262e+06	0	0.0008575	27.93	0.0565337	2	1171.66	-1.38288	58.6122	0
	High	IESLSSQLSNLQK	1	2	1	5031877		0	1.70542e+06	0	8.648e-07	26.62	0.103877	2	1446.78	0.543239	50.9941	0
154354966	mitochondrial inner membrane protein isoform 3 [Homo sapiens]	65.6004	5.89	3	3	3	3	2.17848e+06	747	82.5738	6.56592
	A4	Sequence	# PSMs	# Proteins	# Protein Groups	Protein Group Accessions	Modifications	ΔCn	Area	q-Value	PEP	IonScore	Exp Value	Charge	MH+ [Da]	ΔM [ppm]	RT [min]	# Missed Cleavages
	High	TSSAETPTIPLGSAVEAIK	1	3	1	154354966		0	2.2144e+06	0	1.8e-06	47.47	0.000808459	2	1871.99	-1.36936	60.4714	0
	High	ELDSITPEVLPGWK	1	3	1	154354966		0	685150	0	0.0002504	47.28	0.000795975	2	1583.84	3.44255	63.5292	0
	High	AVDEAADALLK	1	3	1	154354966		0	3.63588e+06	0	0.0002504	27.59	0.0721979	2	1115.6	1.91095	43.9162	0
4507401	transcription factor A, mitochondrial isoform 1 precursor [Homo sapiens]	64.8139	17.48	2	5	5	5	7.27299e+06	246	29.0782	9.71533
	A4	Sequence	# PSMs	# Proteins	# Protein Groups	Protein Group Accessions	Modifications	ΔCn	Area	q-Value	PEP	IonScore	Exp Value	Charge	MH+ [Da]	ΔM [ppm]	RT [min]	# Missed Cleavages
	High	SWEEQMIEVGR	1	2	1	4507401		0	1.19085e+07	0	9.924e-08	63.83	1.41588e-05	2	1363.63	0.0893824	55.3803	0
	High	SAYNVYVAER	1	1	1	4507401		0	439627	0	0.0002684	28.86	0.0390701	2	1171.57	-1.22894	34.4922	0
	High	FKEQLTPSQIMSLEK	1	2	1	4507401		0	1.36166e+06	0.003	0.01993	13.46	1.79876	2	1778.94	2.43391	54.7534	1
	High	IYQDAYR	1	2	1	4507401		0	4.03187e+06	0.006	0.0549	27.14	0.0420203	2	928.454	1.83724	21.4153	0
	High	EQLTPSQIMSLEK	1	2	1	4507401		0	5.8786e+06	0.006	0.05181	10.56	4.41269	2	1503.77	0.727369	54.5021	0
20070228	nucleobindin-1 precursor [Homo sapiens]	64.5376	18.44	1	8	8	8	5.60011e+06	461	53.8463	5.24951
	A4	Sequence	# PSMs	# Proteins	# Protein Groups	Protein Group Accessions	Modifications	ΔCn	Area	q-Value	PEP	IonScore	Exp Value	Charge	MH+ [Da]	ΔM [ppm]	RT [min]	# Missed Cleavages
	High	LSQETEALGR	1	1	1	20070228		0	4.96323e+06	0	1.576e-07	49.36	0.000599667	2	1103.57	-0.2592	24.5242	0
	High	DLELLIQTATR	1	1	1	20070228		0	1.88342e+06	0	0.0002504	43.93	0.00154143	2	1272.72	0.0130518	65.1897	0
	High	LPEVEVPQHL	1	1	1	20070228		0	8.22231e+06	0	7.121e-05	30.2	0.0421629	2	1160.63	1.34811	54.9813	0
	High	YLESLGEEQR	1	1	1	20070228		0	3.61481e+06	0	0.001012	22.57	0.224937	2	1223.59	1.46071	32.9871	0
	High	APAAHPEGQLK	1	1	1	20070228		0	2.23653e+06	0.002	0.001838	24.4	0.171736	2	1118.59	-1.48917	13.4309	0
	High	EVWEELDGLDPNR	1	1	1	20070228		0	2.0017e+06	0.002	0.001838	17.22	0.784288	2	1571.73	0.607888	60.1918	0
	High	RFEEELAAR	1	1	1	20070228		0	1.16393e+06	0.003	0.02103	26.66	0.0942934	2	1120.57	-0.634641	28.0653	1
	Medium	VNVPGSQAQLK	1	1	1	20070228		0	2.78513e+06	0.014	0.1234	17.54	0.37442	2	1140.64	1.65204	29.7129	0
34147630	elongation factor Tu, mitochondrial precursor [Homo sapiens]	64.1636	19.34	1	6	6	6	4.35203e+06	455	49.8433	7.60596
	A4	Sequence	# PSMs	# Proteins	# Protein Groups	Protein Group Accessions	Modifications	ΔCn	Area	q-Value	PEP	IonScore	Exp Value	Charge	MH+ [Da]	ΔM [ppm]	RT [min]	# Missed Cleavages
	High	VEAQVYILSK	1	1	1	34147630		0	2.28176e+06	0	4.181e-10	47.58	0.000487084	2	1149.65	0.401659	45.0769	0
	High	LLDAVDTYIPVPAR	1	1	1	34147630		0	1.92507e+06	0	6.626e-06	36.82	0.00655104	2	1542.85	0.486017	61.8747	0
	High	TIGTGLVTNTLAMTEEEK	1	1	1	34147630		0	2173296	0	3.518e-07	35.71	0.0149037	2	1907.96	0.218702	61.8018	0
	High	NMITGTAPLDGcILVVAANDGPMPQTR	1	1	1	34147630	C12(Carbamidomethyl)	0	0	0	0.0002504	29.3	0.0676741	3	2812.37	-2.89024	66.5242	0
	High	AEAGDNLGALVR	1	1	1	34147630		0	8.60102e+06	0.002	0.008422	13.51	1.53529	2	1185.62	-0.154677	43.6189	0
	Medium	EHLLLAR	1	1	1	34147630		0	1.63375e+06	0.029	0.2419	16.25	0.24188	2	851.51	0.802469	29.475	0
4506701	40S ribosomal protein S23 [Homo sapiens]	64.1225	29.37	1	5	5	6	7.40074e+06	143	15.7977	10.4917
	A4	Sequence	# PSMs	# Proteins	# Protein Groups	Protein Group Accessions	Modifications	ΔCn	Area	q-Value	PEP	IonScore	Exp Value	Charge	MH+ [Da]	ΔM [ppm]	RT [min]	# Missed Cleavages
	High	VANVSLLALYK	1	1	1	4506701		0	4.66888e+06	0	2.271e-10	55.55	2.53537e-05	2	1190.72	0.633392	61.0882	0
	High	GHAVGDIPGVR	1	1	1	4506701		0	7.65856e+06	0	0.001838	28.79	0.0507378	2	1077.58	0.767317	29.3814	0
	High	ANPFGGASHAK	1	1	1	4506701		0	9.87478e+06	0.002	0.0155	12.66	1.81841	2	1056.52	0.203655	18.1394	0
	High	KGHAVGDIPGVR	1	1	1	4506701		0	1.35426e+06	0.006	0.04974	29.47	0.033216	2	1205.67	-0.427333	24.5407	1
	Medium	AHLGTALK	2	1	1	4506701		0	3.84594e+06	0.018	0.1559	13.58	0.550356	1	810.484	0.633398	16.6757	0
20127499	serine/arginine-rich splicing factor 6 [Homo sapiens]	64.094	11.63	2	4	4	5	3.03672e+06	344	39.5634	11.4292
	A4	Sequence	# PSMs	# Proteins	# Protein Groups	Protein Group Accessions	Modifications	ΔCn	Area	q-Value	PEP	IonScore	Exp Value	Charge	MH+ [Da]	ΔM [ppm]	RT [min]	# Missed Cleavages
	High	TNEGVIEFR	1	1	1	20127499		0	4.98431e+06	0	0.0001209	60.68	4.2283e-05	2	1064.54	1.38137	40.4769	0
	High	NGYGFVEFEDSR	1	1	1	20127499		0	2.30521e+06	0	0.0002504	28.89	0.0279549	2	1419.62	1.21088	53.795	0
	High	QAGEVTYADAHK	1	2	1	20127499		0	1.82063e+06	0.001	0.001838	21.4	0.239788	2	1289.61	-1.98248	17.053	0
	Medium	VIVEHAR	2	2	1	20127499		0	0	0.033	0.2536	23.84	0.0739355	2	823.475	-4.37194	10.0713	0
5032179	transcription intermediary factor 1-beta [Homo sapiens]	63.93	16.77	1	6	6	6	6.42589e+06	835	88.4934	5.77002
	A4	Sequence	# PSMs	# Proteins	# Protein Groups	Protein Group Accessions	Modifications	ΔCn	Area	q-Value	PEP	IonScore	Exp Value	Charge	MH+ [Da]	ΔM [ppm]	RT [min]	# Missed Cleavages
	High	LSPPYSSPQEFAQDVGR	1	1	1	5032179		0	8.30162e+06	0	1.607e-10	40.91	0.00471979	2	1877.9	-1.11128	55.515	0
	High	FSAVLVEPPPMSLPGAGLSSQELSGGPGDGP	1	1	1	5032179		0	835061	0	0.0002504	25.23	0.172152	3	2950.45	0.0936962	69.3171	0
	High	aASAAAASAAAASAASGSPGPGEGSAGGEKR	1	1	1	5032179	N-Term(Acetyl)	0	2.33377e+06	0	9.039e-05	24.41	0.20992	3	2585.23	3.63112	43.9015	1
	High	IVAERPGTNSTGPAPMAPPR	1	1	1	5032179		0	5.86145e+06	0	0.0002504	22.13	0.319953	3	2019.05	1.43133	32.994	0
	High	GAAAAATGQPGTAPAGTPGAPPLAGMAIVK	1	1	1	5032179		0	2.73869e+06	0.002	0.001838	13.23	1.87757	3	2572.34	-4.42944	57.9981	0
	High	ADVQSIIGLQR	1	1	1	5032179		0	5.1146e+06	0.003	0.01789	12.6	1.72281	2	1199.68	0.747867	50.8331	0
62244004	SAFB-like transcription modulator isoform b [Homo sapiens]	63.92	1.87	2	1	1	1	1.93606e+06	1016	115.34	8.14795
	A4	Sequence	# PSMs	# Proteins	# Protein Groups	Protein Group Accessions	Modifications	ΔCn	Area	q-Value	PEP	IonScore	Exp Value	Charge	MH+ [Da]	ΔM [ppm]	RT [min]	# Missed Cleavages
	High	aAATGAVAASAASGQAEGK	1	2	1	62244004	N-Term(Acetyl)	0	1.93606e+06	0	3.19e-11	63.92	1.99916e-05	2	1630.8	0.0392169	36.778	0
378548190	40S ribosomal protein S3 isoform 1 [Homo sapiens]	63.9176	25.93	3	5	5	5	2.60844e+06	243	26.6714	9.65674
	A4	Sequence	# PSMs	# Proteins	# Protein Groups	Protein Group Accessions	Modifications	ΔCn	Area	q-Value	PEP	IonScore	Exp Value	Charge	MH+ [Da]	ΔM [ppm]	RT [min]	# Missed Cleavages
	High	ELAEDGYSGVEVR	1	2	1	378548190		0	1.67153e+06	0	6.64e-12	53.64	0.000158084	2	1423.67	-1.24384	37.6492	0
	High	GLcAIAQAESLR	1	2	1	378548190	C3(Carbamidomethyl)	0	997099	0	0.0003994	32.44	0.0281091	2	1288.67	-0.0722388	49.6792	0
	High	TEIIILATR	1	2	1	378548190		0	0	0	0.0002504	28.2	0.0248981	2	1029.63	1.28016	52.4426	0
	High	GGKPEPPAMPQPVPTA	1	3	1	378548190		0	3.39744e+06	0.003	0.03033	25.2	0.150243	2	1573.81	1.69216	41.5621	0
	High	DEILPTTPISEQK	1	3	1	378548190		0	2.75636e+06	0.004	0.03883	26.86	0.0867525	2	1470.77	1.19124	45.7544	0
18543329	26S proteasome non-ATPase regulatory subunit 9 isoform 1 [Homo sapiens]	63.6799	11.21	1	2	2	2	1.1518e+06	223	24.6665	6.94678
	A4	Sequence	# PSMs	# Proteins	# Protein Groups	Protein Group Accessions	Modifications	ΔCn	Area	q-Value	PEP	IonScore	Exp Value	Charge	MH+ [Da]	ΔM [ppm]	RT [min]	# Missed Cleavages
	High	GIGMNEPLVDcEGYPR	1	1	1	18543329	C11(Carbamidomethyl)	0	1.05768e+06	0	0.0002504	50.14	0.000424106	2	1806.82	0.723083	51.8883	0
	High	SDVDLYQVR	1	1	1	18543329		0	1.24592e+06	0	1.101e-05	37.73	0.00731121	2	1094.55	-0.153808	38.2368	0
8923390	coiled-coil-helix-coiled-coil-helix domain-containing protein 3, mitochondrial precursor [Homo sapiens]	63.66	13.22	1	2	2	2	2.20876e+06	227	26.1362	8.27979
	A4	Sequence	# PSMs	# Proteins	# Protein Groups	Protein Group Accessions	Modifications	ΔCn	Area	q-Value	PEP	IonScore	Exp Value	Charge	MH+ [Da]	ΔM [ppm]	RT [min]	# Missed Cleavages
	High	VTFEADENENITVVK	1	1	1	8923390		0	1.64757e+06	0	8.102e-07	48.43	0.000804592	2	1707.85	0.871901	46.7508	0
	High	YSGAYGASVSDEELK	1	1	1	8923390		0	2.76995e+06	0	7.073e-06	39.23	0.00419687	2	1575.72	0.0593541	37.0338	0
51317376	NHP2-like protein 1 [Homo sapiens]	63.29	9.38	1	1	1	1	3.14707e+06	128	14.1646	8.45557
	A4	Sequence	# PSMs	# Proteins	# Protein Groups	Protein Group Accessions	Modifications	ΔCn	Area	q-Value	PEP	IonScore	Exp Value	Charge	MH+ [Da]	ΔM [ppm]	RT [min]	# Missed Cleavages
	High	QQIQSIQQSIER	1	1	1	51317376		0	3.14707e+06	0	0.0002504	63.29	2.00887e-05	2	1457.77	-1.12551	38.7649	0
214010185	amyloid-like protein 2 isoform 4 precursor [Homo sapiens]	63.2538	8.43	5	4	4	4	2.82366e+06	522	59.1141	5.59229
	A4	Sequence	# PSMs	# Proteins	# Protein Groups	Protein Group Accessions	Modifications	ΔCn	Area	q-Value	PEP	IonScore	Exp Value	Charge	MH+ [Da]	ΔM [ppm]	RT [min]	# Missed Cleavages
	High	ADMDQFTASISETPVDVR	1	5	1	214010185		0	1.86246e+06	0	3.256e-07	56.08	0.000110848	2	1981.92	-0.291498	59.2552	0
	High	VSIDNWcR	1	5	1	214010185	C7(Carbamidomethyl)	0	4274871	0.002	0.001838	31.05	0.0234	2	1049.48	1.15235	40.2481	0
	High	QQLVETHLAR	1	5	1	214010185		0	2.33366e+06	0.003	0.02237	11.66	1.90372	2	1194.66	-0.211186	28.1384	0
	High	EMIFNAER	1	5	1	214010185		0	1.16671e+06	0.006	0.05589	13.89	1.35766	2	1009.48	-0.646113	38.7861	0
48255891	glucosidase 2 subunit beta isoform 2 precursor [Homo sapiens]	62.8495	8	2	3	3	3	3.58566e+06	525	59.1407	4.42432
	A4	Sequence	# PSMs	# Proteins	# Protein Groups	Protein Group Accessions	Modifications	ΔCn	Area	q-Value	PEP	IonScore	Exp Value	Charge	MH+ [Da]	ΔM [ppm]	RT [min]	# Missed Cleavages
	High	ETMVTSTTEPSR	1	2	1	48255891		0	4.13733e+06	0	6.656e-06	47.45	0.000673677	2	1338.62	0.74579	22.0616	0
	High	SEALPTDLPAPSAPDLTEPK	1	2	1	48255891		0	1.47435e+06	0	3.707e-09	35.84	0.0138517	2	2049.04	0.294255	56.7788	0
	High	LWEEQLAAAK	1	2	1	48255891		0	5.14529e+06	0	5.321e-05	31.88	0.0305183	2	1158.62	2.10091	44.671	0
46367787	polyadenylate-binding protein 1 [Homo sapiens]	62.6133	10.06	7	5	5	5	2.88463e+06	636	70.6259	9.49561
	A4	Sequence	# PSMs	# Proteins	# Protein Groups	Protein Group Accessions	Modifications	ΔCn	Area	q-Value	PEP	IonScore	Exp Value	Charge	MH+ [Da]	ΔM [ppm]	RT [min]	# Missed Cleavages
	High	SLGYAYVNFQQPADAER	1	4	1	46367787		0	2.15472e+06	0	6.854e-11	46.97	0.000979433	2	1928.91	0.297027	54.1986	0
	High	ALDTMNFDVIK	1	4	1	46367787		0	2.16682e+06	0	0.0002504	36.96	0.00832675	2	1266.64	1.26775	59.7825	0
	High	GFGFVcFSSPEEATK	1	6	1	46367787	C6(Carbamidomethyl)	0	2.27283e+06	0	0.0002504	19.35	0.330432	2	1662.74	-1.34645	61.4014	0
	High	SGVGNIFIK	1	3	1	46367787		0	885379	0	0.001614	15.4	0.847905	2	934.536	0.131509	47.9351	0
	High	EFSPFGTITSAK	1	1	1	46367787		0	4.21424e+06	0.001	0.001838	24.36	0.137597	2	1284.65	0.0319351	56.6088	0
8922511	28S ribosomal protein S18a, mitochondrial isoform 1 precursor [Homo sapiens]	61.9356	16.84	2	3	3	3	5.75204e+06	196	22.1698	10.3306
	A4	Sequence	# PSMs	# Proteins	# Protein Groups	Protein Group Accessions	Modifications	ΔCn	Area	q-Value	PEP	IonScore	Exp Value	Charge	MH+ [Da]	ΔM [ppm]	RT [min]	# Missed Cleavages
	High	ESPNPPNPSGQcPIcR	1	2	1	8922511	C12(Carbamidomethyl); C15(Carbamidomethyl)	0	8.68074e+06	0	5.951e-09	56.33	7.92715e-05	2	1809.8	0.915273	29.3835	0
	High	MPVGSPLLR	1	1	1	8922511		0	5.27255e+06	0.003	0.02432	19.56	0.231838	2	969.555	-0.336444	45.6871	0
	High	LPEGVVPK	1	1	1	8922511		0	3.30281e+06	0.005	0.04568	31.58	0.00799278	2	838.503	0.0145464	31.268	0
20357552	src substrate cortactin isoform a [Homo sapiens]	60.95	11.27	3	5	5	6	3.13364e+06	550	61.5485	5.40186
	A4	Sequence	# PSMs	# Proteins	# Protein Groups	Protein Group Accessions	Modifications	ΔCn	Area	q-Value	PEP	IonScore	Exp Value	Charge	MH+ [Da]	ΔM [ppm]	RT [min]	# Missed Cleavages
	High	NASTFEDVTQVSSAYQK	1	3	1	20357552		0	2.72964e+06	0	1.258e-14	60.2	4.45504e-05	2	1874.88	2.29761	47.4713	0
	High	TQTPPVSPAPQPTEER	2	3	1	20357552		0	2.17157e+06	0	0.000251	20.75	0.454353	2	1734.87	0.275085	28.174	0
	High	VDQSAVGFEYQGK	1	3	1	20357552		0	4.49973e+06	0	0.00123	20	0.3815	2	1427.68	-0.405043	36.1452	0
	High	FGVQSER	1	1	1	20357552		0	973945	0.002	0.008054	27.64	0.0588879	2	822.41	-0.188934	20.8269	0
	Medium	HcSQVDSVR	1	3	1	20357552	C2(Carbamidomethyl)	0	736447	0.02	0.2139	22.62	0.10913	2	1087.49	-2.05235	9.57996	0
5032069	splicing factor 3B subunit 4 [Homo sapiens]	60.88	3.3	1	1	1	1	7754817	424	44.3571	8.55811
	A4	Sequence	# PSMs	# Proteins	# Protein Groups	Protein Group Accessions	Modifications	ΔCn	Area	q-Value	PEP	IonScore	Exp Value	Charge	MH+ [Da]	ΔM [ppm]	RT [min]	# Missed Cleavages
	High	NQDATVYVGGLDEK	1	1	1	5032069		0	7754817	0	7.315e-06	60.88	3.77261e-05	2	1508.72	-1.43343	39.9479	0
48526509	mitochondrial import inner membrane translocase subunit TIM50 [Homo sapiens]	60.83	3.51	1	1	1	1	738462	456	50.4331	9.42236
	A4	Sequence	# PSMs	# Proteins	# Protein Groups	Protein Group Accessions	Modifications	ΔCn	Area	q-Value	PEP	IonScore	Exp Value	Charge	MH+ [Da]	ΔM [ppm]	RT [min]	# Missed Cleavages
	High	IPDEFDNDPILVQQLR	1	1	1	48526509		0	738462	0	1.488e-06	60.83	3.95259e-05	2	1911.98	1.70571	63.0881	0
89886352	oxidoreductase-like domain-containing protein 1 [Homo sapiens]	60.71	10.2	1	1	1	1	1.8205e+06	147	15.8448	8.22119
	A4	Sequence	# PSMs	# Proteins	# Protein Groups	Protein Group Accessions	Modifications	ΔCn	Area	q-Value	PEP	IonScore	Exp Value	Charge	MH+ [Da]	ΔM [ppm]	RT [min]	# Missed Cleavages
	High	ALAALEEHVADENLK	1	1	1	89886352		0	1.8205e+06	0	4.206e-16	60.71	4.13126e-05	2	1622.84	0.0229692	46.6308	0
4506631	60S ribosomal protein L30 [Homo sapiens]	60.5689	31.3	1	4	4	4	7.35262e+06	115	12.7757	9.62744
	A4	Sequence	# PSMs	# Proteins	# Protein Groups	Protein Group Accessions	Modifications	ΔCn	Area	q-Value	PEP	IonScore	Exp Value	Charge	MH+ [Da]	ΔM [ppm]	RT [min]	# Missed Cleavages
	High	VcTLAIIDPGDSDIIR	1	1	1	4506631	C2(Carbamidomethyl)	0	1.46153e+07	0	7.784e-07	59.02	5.38224e-05	2	1757.91	2.58102	63.0567	0
	High	SEIEYYAMLAK	1	1	1	4506631		0	1.30167e+06	0	0.0003225	30.78	0.0341344	2	1317.64	0.658114	57.5905	0
	High	KSEIEYYAMLAK	1	1	1	4506631		0	1.83754e+06	0	0.0003444	22.35	0.270678	2	1445.74	0.515856	51.8432	1
	Medium	SLESINSR	1	1	1	4506631		0	5.60501e+06	0.011	0.119	12.45	2.73049	2	905.472	3.99387	21.2589	0
4506695	40S ribosomal protein S19 [Homo sapiens]	60.4365	21.38	1	3	3	4	3.69159e+06	145	16.0505	10.3159
	A4	Sequence	# PSMs	# Proteins	# Protein Groups	Protein Group Accessions	Modifications	ΔCn	Area	q-Value	PEP	IonScore	Exp Value	Charge	MH+ [Da]	ΔM [ppm]	RT [min]	# Missed Cleavages
	High	ELAPYDENWFYTR	1	1	1	4506695		0	3.25852e+06	0	4.171e-07	43.81	0.00137874	2	1703.77	-0.784698	62.5599	0
	High	DVNQQEFVR	1	1	1	4506695		0	5.96526e+06	0	0.0002504	40.62	0.0043218	2	1134.56	3.2448	29.6374	0
	High	VLQALEGLK	2	1	1	4506695		0	1.85098e+06	0.002	0.0105	20.7	0.152779	2	970.595	2.23905	48.5448	0
209862831	annexin A2 isoform 2 [Homo sapiens]	60.1311	21.83	2	6	6	6	2.00493e+06	339	38.5798	7.75244
	A4	Sequence	# PSMs	# Proteins	# Protein Groups	Protein Group Accessions	Modifications	ΔCn	Area	q-Value	PEP	IonScore	Exp Value	Charge	MH+ [Da]	ΔM [ppm]	RT [min]	# Missed Cleavages
	High	QDIAFAYQR	1	2	1	209862831		0	2.09728e+06	0	0.0005259	45.3	0.00107129	2	1111.55	0.134006	39.6842	0
	High	SLYYYIQQDTK	1	2	1	209862831		0	806822	0	0.0002504	36.05	0.0117701	2	1421.69	-2.04773	51.3148	0
	High	TNQELQEINR	1	2	1	209862831		0	2.28419e+06	0	0.0002634	32.69	0.0255409	2	1244.63	1.74219	27.0227	0
	High	AEDGSVIDYELIDQDAR	1	2	1	209862831		0	949686	0	0.0003221	20.61	0.359315	2	1908.88	0.329407	57.025	0
	High	DIISDTSGDFR	1	2	1	209862831		0	1.63331e+06	0	0.0002504	17.5	0.611728	2	1225.57	1.03387	45.3702	0
	High	GLGTDEDSLIEIIcSR	1	2	1	209862831	C14(Carbamidomethyl)	0	0	0.002	0.001838	31.42	0.038399	2	1777.86	-0.989517	67.6044	0
259013216	catenin alpha-2 isoform 2 [Homo sapiens]	59.93	1.98	3	1	1	1	1.15981e+06	860	95.4982	5.88428
	A4	Sequence	# PSMs	# Proteins	# Protein Groups	Protein Group Accessions	Modifications	ΔCn	Area	q-Value	PEP	IonScore	Exp Value	Charge	MH+ [Da]	ΔM [ppm]	RT [min]	# Missed Cleavages
	High	TSVQTEDDQLIAGQSAR	1	3	1	259013216		0	1.15981e+06	0	5.843e-13	59.93	5.25909e-05	2	1818.88	-0.755395	36.0098	0
242117971	RNA binding motif protein, X-linked-like-1 [Homo sapiens]	59.73	6.41	5	2	2	2	4.90295e+06	390	42.1162	9.89111
	A4	Sequence	# PSMs	# Proteins	# Protein Groups	Protein Group Accessions	Modifications	ΔCn	Area	q-Value	PEP	IonScore	Exp Value	Charge	MH+ [Da]	ΔM [ppm]	RT [min]	# Missed Cleavages
	High	GFAFVTFESPADAK	1	5	1	242117971		0	6.64255e+06	0	3.627e-09	59.73	5.16641e-05	2	1486.72	0.663431	62.8096	0
	High	GPPPSYGGSSR	1	2	1	242117971		0	3.16335e+06	0.003	0.02337	15.8	0.762778	2	1061.5	-0.293245	13.634	0
5729790	transcriptional repressor CTCF isoform 1 [Homo sapiens]	59.57	5.78	2	3	3	3	1.30037e+06	727	82.7324	6.96143
	A4	Sequence	# PSMs	# Proteins	# Protein Groups	Protein Group Accessions	Modifications	ΔCn	Area	q-Value	PEP	IonScore	Exp Value	Charge	MH+ [Da]	ΔM [ppm]	RT [min]	# Missed Cleavages
	High	cPDcDMAFVTSGELVR	1	1	1	5729790	C1(Carbamidomethyl); C4(Carbamidomethyl)	0	1.44537e+06	0	3.184e-09	60.23	2.14343e-05	2	1856.79	-1.65125	58.6144	0
	High	TFQcELcSYTcPR	1	1	1	5729790	C4(Carbamidomethyl); C7(Carbamidomethyl); C11(Carbamidomethyl)	0	1.55594e+06	0	0.0002504	23.34	0.0716025	2	1721.71	1.12402	47.6623	0
	High	cSMcDYASVEVSK	1	2	1	5729790	C1(Carbamidomethyl); C4(Carbamidomethyl)	0	899786	0	0.0002504	12.55	0.458621	2	1535.62	-0.595561	38.8998	0
22027538	programmed cell death 6-interacting protein isoform 1 [Homo sapiens]	59.34	1.84	2	1	1	1		868	95.9631	6.52197
	A4	Sequence	# PSMs	# Proteins	# Protein Groups	Protein Group Accessions	Modifications	ΔCn	Area	q-Value	PEP	IonScore	Exp Value	Charge	MH+ [Da]	ΔM [ppm]	RT [min]	# Missed Cleavages
	High	SVIEQGGIQTVDQLIK	1	2	1	22027538		0	0	0	1.057e-07	59.34	3.05001e-05	2	1727.96	0.867247	62.019	0
219555712	eukaryotic translation initiation factor 5A-1 isoform B [Homo sapiens]	59.0706	25.97	4	3	3	3	3.94012e+06	154	16.8214	5.23682
	A4	Sequence	# PSMs	# Proteins	# Protein Groups	Protein Group Accessions	Modifications	ΔCn	Area	q-Value	PEP	IonScore	Exp Value	Charge	MH+ [Da]	ΔM [ppm]	RT [min]	# Missed Cleavages
	High	aDDLDFETGDAGASATFPMQcSALR	1	2	1	219555712	N-Term(Acetyl); C21(Carbamidomethyl)	0	9.85731e+06	0	4.206e-16	55.42	8.03819e-05	3	2688.16	1.11193	65.5729	0
	High	NGFVVLK	1	4	1	219555712		0	746313	0.004	0.04152	26.92	0.0363792	2	776.468	1.56955	41.5844	0
	High	IVEMSTSK	1	3	1	219555712		0	1.21674e+06	0.007	0.066	21.94	0.256534	1	894.461	0.548972	18.1464	0
4506901	serine/arginine-rich splicing factor 3 [Homo sapiens]	59.0586	36.59	1	5	6	7	1.05771e+07	164	19.3179	11.6489
	A4	Sequence	# PSMs	# Proteins	# Protein Groups	Protein Group Accessions	Modifications	ΔCn	Area	q-Value	PEP	IonScore	Exp Value	Charge	MH+ [Da]	ΔM [ppm]	RT [min]	# Missed Cleavages
	High	NPPGFAFVEFEDPR	1	3	2	4506901;306482694		0	2.61907e+07	0	8.375e-08	42.29	0.00254377	2	1621.76	0.0460833	64.4077	0
	High	VYVGNLGNNGNK	1	1	1	4506901		0	0	0	0.0002504	36.01	0.0130443	2	1248.64	1.99931	27.5575	0
	High	AFGYYGPLR	1	1	1	4506901		0	0	0	0.0002504	35.13	0.0101431	2	1043.53	0.009667	49.8669	0
	Medium	GPPPSWGR	2	1	1	4506901		0	4.54965e+06	0.014	0.1229	14.55	0.861096	2	853.432	0.291756	23.7265	0
	Medium	VRVELSNGEK	1	1	1	4506901		0	0	0.038	0.3504	13.57	2.04607	2	1130.62	0.027752	20.6478	1
	Medium	NPPGFAFVEFEDPRDAADAVR	1	1	1	4506901		0	991038	0.047	0.4916	11.89	3.55281	3	2320.11	2.96325	63.8741	1
5031645	cytochrome c oxidase copper chaperone [Homo sapiens]	58.24	25.4	1	1	1	2	5.21395e+07	63	6.91038	7.23975
	A4	Sequence	# PSMs	# Proteins	# Protein Groups	Protein Group Accessions	Modifications	ΔCn	Area	q-Value	PEP	IonScore	Exp Value	Charge	MH+ [Da]	ΔM [ppm]	RT [min]	# Missed Cleavages
	High	PGLVDSNPAPPESQEK	2	1	1	5031645		0	5.21395e+07	0	4.206e-16	58.24	7.6334e-05	2	1664.81	0.0603307	30.7941	0
31742503	histone H3.2 [Homo sapiens]	57.9892	19.85	5	4	4	7	1.38028e+08	136	15.3785	11.2681
	A4	Sequence	# PSMs	# Proteins	# Protein Groups	Protein Group Accessions	Modifications	ΔCn	Area	q-Value	PEP	IonScore	Exp Value	Charge	MH+ [Da]	ΔM [ppm]	RT [min]	# Missed Cleavages
	High	STELLIR	3	5	1	31742503		0	1.48733e+08	0	0.0009525	35.8	0.0109945	2	831.492	-1.93918	36.7973	0
	High	YRPGTVALR	2	5	1	31742503		0	2.57797e+08	0.007	0.06003	16.85	0.589666	2	1032.6	0.32069	23.5973	0
	Medium	EIAQDFK	1	4	1	31742503		0	7.55526e+06	0.013	0.1216	26.5	0.0941382	1	850.432	1.42446	25.7326	0
	Medium	EIAQDFKTDLR	1	4	1	31742503		0	7.28e+06	0.048	0.509	14.02	1.98535	2	1335.69	1.08465	39.5877	1
16753215	profilin-2 isoform a [Homo sapiens]	57.83	20	2	2	2	3	4.18783e+06	140	15.0363	6.99072
	A4	Sequence	# PSMs	# Proteins	# Protein Groups	Protein Group Accessions	Modifications	ΔCn	Area	q-Value	PEP	IonScore	Exp Value	Charge	MH+ [Da]	ΔM [ppm]	RT [min]	# Missed Cleavages
	High	DSLYVDGDcTMDIR	1	2	1	16753215	C9(Carbamidomethyl)	0	2.61407e+06	0	8.417e-10	44.09	0.000571265	2	1659.69	-3.20793	48.856	0
	High	SQGGEPTYNVAVGR	2	2	1	16753215		0	5.7616e+06	0	1.227e-07	38.74	0.00585429	2	1434.7	1.75182	31.5347	0
14249398	PHD finger-like domain-containing protein 5A [Homo sapiens]	57.68	28.18	1	3	3	3	1.36693e+06	110	12.397	8.41162
	A4	Sequence	# PSMs	# Proteins	# Protein Groups	Protein Group Accessions	Modifications	ΔCn	Area	q-Value	PEP	IonScore	Exp Value	Charge	MH+ [Da]	ΔM [ppm]	RT [min]	# Missed Cleavages
	High	cVIcGGPGVSDAYYcK	1	1	1	14249398	C1(Carbamidomethyl); C4(Carbamidomethyl); C15(Carbamidomethyl)	0	1.37564e+06	0	1.297e-15	57.68	3.16478e-05	2	1805.76	-1.51643	42.6497	0
	High	TDLFYER	1	1	1	14249398		0	1.76238e+06	0.005	0.04225	21.13	0.163046	2	943.452	-0.181752	40.1075	0
	High	IVNLGSSK	1	1	1	14249398		0	962770	0.007	0.05965	19.05	0.528296	1	817.478	0.463816	20.875	0
296010882	zinc finger X-chromosomal protein isoform 2 [Homo sapiens]	57.67	6.08	5	3	3	3	623561	576	66.0224	8.42627
	A4	Sequence	# PSMs	# Proteins	# Protein Groups	Protein Group Accessions	Modifications	ΔCn	Area	q-Value	PEP	IonScore	Exp Value	Charge	MH+ [Da]	ΔM [ppm]	RT [min]	# Missed Cleavages
	High	FcEYETAEQGLLNR	1	5	1	296010882	C2(Carbamidomethyl)	0	422390	0	4.206e-16	57.67	6.43821e-05	2	1729.79	0.85058	50.0961	0
	High	IADPFVLSR	1	5	1	296010882		0	1.01692e+06	0	0.0002504	19.82	0.42266	2	1017.57	0.110336	55.4095	0
	High	cDIcLLTFSDTK	1	5	1	296010882	C1(Carbamidomethyl); C4(Carbamidomethyl)	0	431375	0	0.0002504	10.81	2.54764	2	1472.68	-0.391575	60.2501	0
4506723	40S ribosomal protein S3a isoform 1 [Homo sapiens]	57.1549	14.39	2	4	4	5	5.91125e+06	264	29.9257	9.72998
	A4	Sequence	# PSMs	# Proteins	# Protein Groups	Protein Group Accessions	Modifications	ΔCn	Area	q-Value	PEP	IonScore	Exp Value	Charge	MH+ [Da]	ΔM [ppm]	RT [min]	# Missed Cleavages
	High	LITEDVQGK	2	1	1	4506723		0	8.23462e+06	0	0.0003753	42.24	0.00304189	2	1002.55	-0.459952	24.901	0
	High	TTDGYLLR	1	1	1	4506723		0	4.01883e+06	0	0.0002504	35.08	0.00977936	2	938.495	0.441313	34.6815	0
	High	APAMFNIR	1	2	1	4506723		0	5.4803e+06	0	0.0009282	25.14	0.160294	2	919.482	0.429664	46.9874	0
	High	NcLTNFHGMDLTR	1	1	1	4506723	C2(Carbamidomethyl)	0	1.06901e+06	0	0.0002504	22.32	0.211596	2	1578.72	2.26278	49.4408	0
17105394	60S ribosomal protein L23a [Homo sapiens]	56.9634	36.54	1	5	5	6	1.17846e+07	156	17.6841	10.4478
	A4	Sequence	# PSMs	# Proteins	# Protein Groups	Protein Group Accessions	Modifications	ΔCn	Area	q-Value	PEP	IonScore	Exp Value	Charge	MH+ [Da]	ΔM [ppm]	RT [min]	# Missed Cleavages
	High	IEDNNTLVFIVDVK	1	1	1	17105394		0	599219	0	1.753e-05	52.63	0.0002123	2	1618.87	0.502285	64.9343	0
	High	VNTLIRPDGEK	1	1	1	17105394		0	6.57165e+06	0	0.0003715	32.56	0.0157514	2	1241.69	0.271375	25.2574	0
	High	LAPDYDALDVANK	1	1	1	17105394		0	2.25519e+07	0	0.0002504	11.6	3.49029	2	1404.7	-2.68838	46.0821	0
	High	KLYDIDVAK	1	1	1	17105394		0	1.79438e+06	0.005	0.04301	21.35	0.208489	2	1064.6	-0.918141	35.3064	1
	Medium	FPLTTESAMK	2	1	1	17105394		0	6.2302e+06	0.014	0.1244	21.02	0.300063	2	1124.57	0.469877	42.3402	0
316983158	NADH-ubiquinone oxidoreductase 75 kDa subunit, mitochondrial isoform 3 [Homo sapiens]	56.82	5.03	5	2	2	2	1.49609e+06	616	67.4813	5.32568
	A4	Sequence	# PSMs	# Proteins	# Protein Groups	Protein Group Accessions	Modifications	ΔCn	Area	q-Value	PEP	IonScore	Exp Value	Charge	MH+ [Da]	ΔM [ppm]	RT [min]	# Missed Cleavages
	High	FASEIAGVDDLGTTGR	1	5	1	316983158		0	1.49609e+06	0	7.464e-12	51.78	0.000355103	2	1608.79	0.95113	50.0136	0
	High	AVTEGAQAVEEPSIc	1	5	1	316983158	C15(Carbamidomethyl)	0	0	0.002	0.006421	29.04	0.0421616	2	1560.72	1.42171	40.4838	0
31541941	heat shock 70 kDa protein 4L [Homo sapiens]	56.6	3.34	2	1	2	2	1.42386e+06	839	94.4525	5.88428
	A4	Sequence	# PSMs	# Proteins	# Protein Groups	Protein Group Accessions	Modifications	ΔCn	Area	q-Value	PEP	IonScore	Exp Value	Charge	MH+ [Da]	ΔM [ppm]	RT [min]	# Missed Cleavages
	High	DISTTLNADEAVAR	1	2	1	31541941		0	1.92782e+06	0	8.615e-09	45	0.0014673	2	1475.73	-0.0902557	43.4978	0
	High	GcALQcAILSPAFK	1	3	2	31541941;38327039	C2(Carbamidomethyl); C6(Carbamidomethyl)	0	919907	0	0.0002504	35.6	0.0155201	2	1535.77	-0.660412	60.2455	0
218505670	epithelial cell adhesion molecule precursor [Homo sapiens]	56.4	5.1	1	1	1	1	355605	314	34.9097	7.45947
	A4	Sequence	# PSMs	# Proteins	# Protein Groups	Protein Group Accessions	Modifications	ΔCn	Area	q-Value	PEP	IonScore	Exp Value	Charge	MH+ [Da]	ΔM [ppm]	RT [min]	# Missed Cleavages
	High	TQNDVDIADVAYYFEK	1	1	1	218505670		0	355605	0	4.206e-16	56.4	0.000110076	2	1890.87	-1.09925	66.9409	0
4504981	galectin-1 [Homo sapiens]	56.16	24.44	1	2	2	3	1.1951e+06	135	14.7062	5.50342
	A4	Sequence	# PSMs	# Proteins	# Protein Groups	Protein Group Accessions	Modifications	ΔCn	Area	q-Value	PEP	IonScore	Exp Value	Charge	MH+ [Da]	ΔM [ppm]	RT [min]	# Missed Cleavages
	High	acGLVASNLNLKPGEcLR	2	1	1	4504981	N-Term(Acetyl); C2(Carbamidomethyl); C16(Carbamidomethyl)	0	1981978	0	1.66e-10	56.16	0.000127467	2	2014.02	0.594842	59.8119	0
	High	FNAHGDANTIVcNSK	1	1	1	4504981	C12(Carbamidomethyl)	0	408213	0.006	0.05458	14.04	1.52655	2	1647.75	0.220325	27.3137	0
89357932	keratin, type II cytoskeletal 78 [Homo sapiens]	56.0631	9.23	1	3	4	4	1.04078e+06	520	56.8305	6.02393
	A4	Sequence	# PSMs	# Proteins	# Protein Groups	Protein Group Accessions	Modifications	ΔCn	Area	q-Value	PEP	IonScore	Exp Value	Charge	MH+ [Da]	ΔM [ppm]	RT [min]	# Missed Cleavages
	High	TLNNQFASFIDK	1	1	1	89357932		0	2.11747e+06	0	0.0002504	48	0.000686259	2	1397.7	-2.20565	59.3939	0
	High	YLDFSSIITEVR	1	1	1	89357932		0	313166	0	2.454e-05	37.2	0.00739319	2	1442.75	1.60049	68.3735	0
	High	VQISQLHQEIQR	1	1	1	89357932		0	691711	0	0.001253	23.94	0.134616	2	1478.81	-0.103276	35.8886	0
	High	FLEQQNKVLETK	1	6	3	5031839;109148552;89357932		0	0	0.002	0.001838	25.48	0.122316	2	1476.79	-7.70058	41.232	1
32189394	ATP synthase subunit beta, mitochondrial precursor [Homo sapiens]	55.8667	12.85	1	5	5	5	1.37676e+06	529	56.5246	5.40186
	A4	Sequence	# PSMs	# Proteins	# Protein Groups	Protein Group Accessions	Modifications	ΔCn	Area	q-Value	PEP	IonScore	Exp Value	Charge	MH+ [Da]	ΔM [ppm]	RT [min]	# Missed Cleavages
	High	AIAELGIYPAVDPLDSTSR	1	1	1	32189394		0	1.42514e+06	0	0.0002504	44.77	0.0014204	2	1988.03	0.1357	64.558	0
	High	IMNVIGEPIDER	1	1	1	32189394		0	1.1012e+06	0	0.0002504	22.71	0.21539	2	1385.71	0.607181	50.026	0
	High	FTQAGSEVSALLGR	1	1	1	32189394		0	614386	0.001	0.001838	27.49	0.0834153	2	1435.76	1.29944	58.2446	0
	High	TIAMDGTEGLVR	1	1	1	32189394		0	1.60395e+06	0.002	0.001838	30.94	0.0411146	2	1262.64	2.8413	43.8846	0
	High	IGLFGGAGVGK	1	1	1	32189394		0	765002	0.002	0.008808	19.28	0.356457	2	975.564	1.35706	49.795	0
28173564	keratin, type II cytoskeletal 73 [Homo sapiens]	55.3111	8.52	4	2	3	7	2.27409e+07	540	58.8867	7.2251
	A4	Sequence	# PSMs	# Proteins	# Protein Groups	Protein Group Accessions	Modifications	ΔCn	Area	q-Value	PEP	IonScore	Exp Value	Charge	MH+ [Da]	ΔM [ppm]	RT [min]	# Missed Cleavages
	High	FLEQQNQVLETK	3	5	1	28173564		0	1.38359e+07	0	1.054e-09	39.83	0.0052048	2	1476.77	-0.996389	39.0486	0
	High	FASFIDK	3	20	9	47132620;28173564;119703753;5031839;119395754;109148552;194018511;331999954;372466577		0	3.1646e+07	0.002	0.01203	23.81	0.0971151	2	827.43	0.04335	40.8821	0
	High	CLYEGETAQIQSHISDTSIILSMDNNR	1	1	1	28173564		0	0	0.002	0.001838	15.88	1.37764	3	3038.43	2.06129	64.6624	0
68509926	putative pre-mRNA-splicing factor ATP-dependent RNA helicase DHX15 [Homo sapiens]	55.2025	9.43	1	6	6	6	2.01643e+06	795	90.8752	7.45947
	A4	Sequence	# PSMs	# Proteins	# Protein Groups	Protein Group Accessions	Modifications	ΔCn	Area	q-Value	PEP	IonScore	Exp Value	Charge	MH+ [Da]	ΔM [ppm]	RT [min]	# Missed Cleavages
	High	SNLGSVVLQLK	1	1	1	68509926		0	425226	0	0.0002504	43.8	0.000904607	2	1157.69	0.0960038	57.6902	0
	High	EVDDLGPEVGDIK	1	1	1	68509926		0	3.42795e+06	0	1.904e-07	39.1	0.00490877	2	1385.68	1.36596	44.9427	0
	High	TEMQDNTYPEILR	1	1	1	68509926		0	1.12341e+06	0	0.0002504	13.96	1.73373	2	1609.75	0.392729	49.4943	0
	High	TcTDIKPEWLVK	1	1	1	68509926	C2(Carbamidomethyl)	0	0	0	0.0002504	10.58	4.17367	2	1489.77	-0.802639	48.9782	0
	High	YGVIILDEAHER	1	1	1	68509926		0	775385	0	0.0002504	9.65	4.43326	2	1414.73	1.40194	47.4026	0
	High	HQSFVLVGETGSGK	1	1	1	68509926		0	1.49793e+06	0.003	0.029	19.56	0.533393	2	1445.74	0.723631	37.0462	0
4557581	fatty acid-binding protein, epidermal [Homo sapiens]	54.8465	31.85	2	4	4	4	1.38372e+06	135	15.1546	7.00537
	A4	Sequence	# PSMs	# Proteins	# Protein Groups	Protein Group Accessions	Modifications	ΔCn	Area	q-Value	PEP	IonScore	Exp Value	Charge	MH+ [Da]	ΔM [ppm]	RT [min]	# Missed Cleavages
	High	LVVEcVMNNVTcTR	1	2	1	4557581	C5(Carbamidomethyl); C12(Carbamidomethyl)	0	955987	0	4.942e-14	56.41	0.000103766	2	1694.8	-1.53946	54.2523	0
	High	ELGVGIALR	1	1	1	4557581		0	1.82594e+06	0.002	0.004584	25.18	0.0426262	2	927.562	-0.272777	49.8784	0
	High	TTQFScTLGEK	1	1	1	4557581	C6(Carbamidomethyl)	0	1.36924e+06	0.005	0.04289	18.27	0.438617	2	1271.59	-0.671806	32.5976	0
	Medium	aTVQQLEGR	1	2	1	4557581	N-Term(Acetyl)	0	472982	0.011	0.1168	14.05	1.44236	1	1043.55	-0.186601	38.3244	0
193083114	poly(rC)-binding protein 2 isoform g [Homo sapiens]	54.7727	21.7	9	3	5	5	8.78354e+06	318	33.4753	8.23584
	A4	Sequence	# PSMs	# Proteins	# Protein Groups	Protein Group Accessions	Modifications	ΔCn	Area	q-Value	PEP	IonScore	Exp Value	Charge	MH+ [Da]	ΔM [ppm]	RT [min]	# Missed Cleavages
	High	INISEGNcPER	1	10	2	193083114;222352151	C8(Carbamidomethyl)	0	1.34552e+07	0	0.0002504	38.61	0.00343614	2	1288.59	-0.715113	26.294	0
	High	ESTGAQVQVAGDMLPNSTER	1	10	2	193083114;222352151		0	3.64086e+06	0	7.26e-10	32.82	0.0266683	2	2089.99	2.68668	45.1342	0
	High	LVVPASQcGSLIGK	1	9	1	193083114	C8(Carbamidomethyl)	0	6.49223e+06	0	0.0002749	31.33	0.0261722	2	1428.79	1.47073	45.7401	0
	High	IANPVEGSTDR	1	7	1	193083114		0	6.40323e+06	0	0.0002504	22.61	0.174078	2	1158.57	-0.423633	24.6564	0
	Medium	IITLAGPTNAIFK	1	7	1	193083114		0	720386	0.025	0.2419	11.91	0.905058	2	1358.81	2.1307	62.8266	0
251831110	cytochrome c oxidase subunit II [Homo sapiens]	54.67	7.05	1	1	1	1	870297	227	25.5482	4.81787
	A4	Sequence	# PSMs	# Proteins	# Protein Groups	Protein Group Accessions	Modifications	ΔCn	Area	q-Value	PEP	IonScore	Exp Value	Charge	MH+ [Da]	ΔM [ppm]	RT [min]	# Missed Cleavages
	High	ILYMTDEVNDPSLTIK	1	1	1	251831110		0	870297	0	8.132e-08	54.67	0.000181685	2	1851.94	-0.635245	60.1019	0
10863977	U6 snRNA-associated Sm-like protein LSm2 [Homo sapiens]	54.64	20	1	1	1	1		95	10.8276	6.52197
	A4	Sequence	# PSMs	# Proteins	# Protein Groups	Protein Group Accessions	Modifications	ΔCn	Area	q-Value	PEP	IonScore	Exp Value	Charge	MH+ [Da]	ΔM [ppm]	RT [min]	# Missed Cleavages
	High	YVQLPADEVDTQLLQDAAR	1	1	1	10863977		0	0	0	4.206e-16	54.64	0.000184834	2	2145.08	1.13427	62.9896	0
190885499	cytochrome c oxidase subunit 5A, mitochondrial precursor [Homo sapiens]	54.46	10.67	1	2	2	2	3.90035e+06	150	16.7517	6.78564
	A4	Sequence	# PSMs	# Proteins	# Protein Groups	Protein Group Accessions	Modifications	ΔCn	Area	q-Value	PEP	IonScore	Exp Value	Charge	MH+ [Da]	ΔM [ppm]	RT [min]	# Missed Cleavages
	High	LNDFASTVR	1	1	1	190885499		0	6.35251e+06	0	0.0002504	54.46	0.000126229	2	1022.53	0.553441	33.5105	0
	Medium	IIDAALR	1	1	1	190885499		0	1.44818e+06	0.021	0.2417	13.44	1.173	1	771.472	-0.567048	30.8633	0
14277700	40S ribosomal protein S12 [Homo sapiens]	54.4125	34.09	1	4	4	4	3.02281e+06	132	14.5055	7.21045
	A4	Sequence	# PSMs	# Proteins	# Protein Groups	Protein Group Accessions	Modifications	ΔCn	Area	q-Value	PEP	IonScore	Exp Value	Charge	MH+ [Da]	ΔM [ppm]	RT [min]	# Missed Cleavages
	High	LGEWVGLcK	1	1	1	14277700	C8(Carbamidomethyl)	0	3.39014e+06	0	0.0002504	37.27	0.00964685	2	1061.55	0.194287	49.2439	0
	High	DVIEEYFK	1	1	1	14277700		0	1.09919e+06	0	0.001838	30.75	0.0242322	1	1042.51	-2.96188	55.9577	0
	High	QAHLcVLASNcDEPMYVK	1	1	1	14277700	C5(Carbamidomethyl); C11(Carbamidomethyl)	0	2.0812e+06	0	1.392e-05	27.1	0.0787737	3	2134.97	-2.3594	48.3177	0
	High	TALIHDGLAR	1	1	1	14277700		0	3.5971e+06	0.002	0.004267	28.92	0.0269289	2	1066.6	-0.373256	30.6237	0
261862352	serine hydroxymethyltransferase, mitochondrial isoform 3 [Homo sapiens]	54.1859	6.42	3	3	3	3	819655	483	53.4214	8.14795
	A4	Sequence	# PSMs	# Proteins	# Protein Groups	Protein Group Accessions	Modifications	ΔCn	Area	q-Value	PEP	IonScore	Exp Value	Charge	MH+ [Da]	ΔM [ppm]	RT [min]	# Missed Cleavages
	High	AALEALGScLNNK	1	3	1	261862352	C9(Carbamidomethyl)	0	1.44629e+06	0	1.28e-08	44.41	0.00190902	2	1360.69	-0.525675	45.2479	0
	High	AMADALLER	1	3	1	261862352		0	302392	0.001	0.001838	32.13	0.0286274	2	989.507	-1.58334	43.1388	0
	High	LGAPALTSR	1	3	1	261862352		0	710285	0.008	0.07906	13.53	1.15116	2	885.513	-2.25753	30.8705	0
4503423	deoxyuridine 5'-triphosphate nucleotidohydrolase, mitochondrial isoform 2 [Homo sapiens]	53.74	32.32	3	4	4	5	2.91681e+06	164	17.7369	6.56592
	A4	Sequence	# PSMs	# Proteins	# Protein Groups	Protein Group Accessions	Modifications	ΔCn	Area	q-Value	PEP	IonScore	Exp Value	Charge	MH+ [Da]	ΔM [ppm]	RT [min]	# Missed Cleavages
	High	IFYPEIEEVQALDDTER	2	3	1	4503423		0	3.02166e+06	0	2.371e-09	56.21	0.000129718	2	2066.99	0.219545	64.5123	0
	High	TDIQIALPSGcYGR	1	3	1	4503423	C11(Carbamidomethyl)	0	3.38305e+06	0	0.0002504	27.01	0.0971449	2	1550.76	-2.42996	53.6813	0
	High	ARPAEVGGMQLR	1	2	1	4503423		0	1.8403e+06	0	0.000615	25.41	0.0949541	2	1284.68	-0.815946	30.8517	0
	High	LSEHATAPTR	1	3	1	4503423		0	2.34572e+06	0.003	0.02311	19.3	0.412389	2	1082.56	-2.5323	13.3246	0
86991440	serine/arginine-rich splicing factor 5 [Homo sapiens]	53.63	5.51	1	1	1	1	1.08653e+06	272	31.2453	11.5903
	A4	Sequence	# PSMs	# Proteins	# Protein Groups	Protein Group Accessions	Modifications	ΔCn	Area	q-Value	PEP	IonScore	Exp Value	Charge	MH+ [Da]	ΔM [ppm]	RT [min]	# Missed Cleavages
	High	LNEGVVEFASYGDLK	1	1	1	86991440		0	1.08653e+06	0	3.168e-14	53.63	0.000211987	2	1640.82	1.03953	59.9342	0
23510340	ubiquitin-like modifier-activating enzyme 1 [Homo sapiens]	53.18	3.21	1	2	2	2	555330	1058	117.774	5.75732
	A4	Sequence	# PSMs	# Proteins	# Protein Groups	Protein Group Accessions	Modifications	ΔCn	Area	q-Value	PEP	IonScore	Exp Value	Charge	MH+ [Da]	ΔM [ppm]	RT [min]	# Missed Cleavages
	High	ALPAVQQNNLDEDLIR	1	1	1	23510340		0	555330	0	5.25e-06	44.16	0.00183604	2	1808.95	-0.51132	56.4798	0
	High	NEEDAAELVALAQAVNAR	1	1	1	23510340		0	0	0	1.125e-08	33.02	0.0250939	2	1883.95	2.33107	65.3421	0
90193619	zinc finger protein 384 isoform c [Homo sapiens]	53.12	9.54	3	2	3	3	4.81649e+06	461	50.5055	8.47021
	A4	Sequence	# PSMs	# Proteins	# Protein Groups	Protein Group Accessions	Modifications	ΔCn	Area	q-Value	PEP	IonScore	Exp Value	Charge	MH+ [Da]	ΔM [ppm]	RT [min]	# Missed Cleavages
	High	VASTLTEEGGGGGGGGGSVAPKPPR	1	3	1	90193619		0	8.62597e+06	0	1.825e-13	53.12	0.000258634	3	2195.11	0.619667	29.9072	0
	High	AYTSETYLMK	1	4	2	38570115;90193619		0	3.97678e+06	0.002	0.006785	10.05	3.3166	2	1206.57	-0.133311	39.285	0
	Medium	McSLTFYSK	1	3	1	90193619	C2(Carbamidomethyl)	0	1.84671e+06	0.02	0.2083	19.11	0.362708	2	1136.51	2.04682	44.69	0
4506725	40S ribosomal protein S4, X isoform X isoform [Homo sapiens]	52.9615	18.25	3	4	4	4	3.63628e+06	263	29.5791	10.1548
	A4	Sequence	# PSMs	# Proteins	# Protein Groups	Protein Group Accessions	Modifications	ΔCn	Area	q-Value	PEP	IonScore	Exp Value	Charge	MH+ [Da]	ΔM [ppm]	RT [min]	# Missed Cleavages
[truncated: 2,393 more rows]

## Sheet: MCF7_Sample_01
Accession	Description	Score	Coverage	# Proteins	# Unique Peptides	# Peptides	# PSMs	Area	# AAs	MW [kDa]	calc. pI
41872631	fatty acid synthase [Homo sapiens]	1688.36	42.09	1	79	79	111	4.57117e+08	2511	273.254	6.44287
	A4	Sequence	# PSMs	# Proteins	# Protein Groups	Protein Group Accessions	Modifications	ΔCn	Area	q-Value	PEP	IonScore	Exp Value	Charge	MH+ [Da]	ΔM [ppm]	RT [min]	# Missed Cleavages
	High	GNAGQSNYGFANSAMER	1	1	1	41872631		0	1.60978e+08	0	1.334e-08	114.16	9.45838e-11	2	1773.76	-0.188066	35.0811	0
	High	TGGAYGEDLGADYNLSQVcDGK	1	1	1	41872631	C19(Carbamidomethyl)	0	7.33856e+06	0	3.755e-09	104.3	1.16848e-09	2	2289.99	0.231661	49.3938	0
	High	WTSQDSLLGMEFSGR	1	1	1	41872631		0	5.25422e+07	0	2.089e-08	98.06	5.30689e-09	2	1713.79	0.870745	61.4745	0
	High	AINcATSGVVGLVNcLR	2	1	1	41872631	C4(Carbamidomethyl); C15(Carbamidomethyl)	0	9.52559e+07	0	1.531e-09	93.37	2.44626e-08	2	1803.92	0.997554	62.4154	0
	High	LPEDPLLSGLLDSPALK	2	1	1	41872631		0	1.10073e+08	0	8.862e-09	89.4	2.14705e-08	2	1778	3.14985	70.5578	0
	High	VTVAGGVHISGLHTESAPR	1	1	1	41872631		0	2.28942e+07	0	3.42e-10	85.8	1.21913e-07	2	1888	-0.0178295	35.1041	0
	High	FcFTPHTEEGcLSER	1	1	1	41872631	C2(Carbamidomethyl); C11(Carbamidomethyl)	0	5.49833e+07	0	5.615e-09	75.89	5.78384e-07	2	1869.79	-2.04685	40.255	0
	High	VLQGDLVMNVYR	2	1	1	41872631		0	1.69277e+08	0	1.856e-06	73.07	2.14284e-06	2	1406.75	0.628785	53.0906	0
	High	IPGLLSPHPLLQLSYTATDR	1	1	1	41872631		0	3.1042e+07	0	1.049e-09	71.25	1.61602e-06	2	2192.21	0.0482755	64.1748	0
	High	DTVTISGPQAPVFEFVEQLRK	1	1	1	41872631		0	2.21928e+06	0	7.316e-05	68.22	6.07163e-06	2	2361.24	-0.0341576	70.1054	1
	High	EDGLAQQQTQLNLR	2	1	1	41872631		0	1.95751e+08	0	5.174e-07	67.61	9.10247e-06	2	1613.82	-1.04345	37.0446	0
	High	FDLSQNHPLGMAIFLK	2	1	1	41872631		0	7.84894e+07	0	1.423e-09	63.46	2.11884e-05	2	1830.96	1.00531	64.9064	0
	High	AcLDTAVENMPSLK	1	1	1	41872631	C2(Carbamidomethyl)	0	1.55974e+08	0	2.262e-06	63.09	2.00045e-05	2	1548.74	-1.05931	50.2662	0
	High	DPETLVGYSMVGcQR	1	1	1	41872631	C13(Carbamidomethyl)	0	4.97109e+07	0	1.72e-07	62.87	1.98562e-05	2	1711.77	-3.36083	50.4802	0
	High	mEEVVIAGMSGK	2	1	1	41872631	N-Term(Acetyl)	0	8.0906e+07	0	3.615e-06	62.29	2.36376e-05	2	1292.62	0.87305	65.8333	0
	High	EQGVTFPSGDIQEQLIR	1	1	1	41872631		0	3.33954e+07	0	1.197e-08	61.39	3.64142e-05	2	1916.97	0.848572	58.8146	0
	High	LNSVQSSERPLFLVHPIEGSTTVFHSLASR	1	1	1	41872631		0	2.01828e+07	0	1.799e-10	61.36	2.26288e-05	3	3308.74	0.151003	61.2102	0
	High	TGTVSLEVR	1	1	1	41872631		0	59276806	0	0.0001982	60.38	3.77941e-05	2	961.53	-0.987206	28.7127	0
	High	WLSTSIPEAQWHSSLAR	2	1	1	41872631		0	3.04219e+08	0	1.247e-05	56.51	0.000122735	2	1968.99	0.378113	55.6754	0
	High	LQVVDQPLPVR	2	1	1	41872631		0	4.06108e+08	0	0.0001407	53.96	7.05143e-05	2	1263.74	-1.07864	44.1255	0
	High	DPSQQELPR	2	1	1	41872631		0	7.84941e+07	0	0.000222	53.95	0.000119607	2	1069.53	-1.18064	20.1939	0
	High	LHLSGIDANPNALFPPVEFPAPR	1	1	1	41872631		0	1.41236e+07	0	7.933e-08	53.15	0.000172123	2	2472.31	3.35066	66.3608	0
	High	AFDTAGNGYcR	2	1	1	41872631	C10(Carbamidomethyl)	0	8.38162e+07	0	6.637e-05	52.49	9.49729e-05	2	1231.51	-1.92919	22.9933	0
	High	GNAGQSNYGFANSAmER	1	1	1	41872631	M15(Oxidation)	0	8693171	0	5.153e-05	52.04	0.000112844	2	1789.75	-1.98316	28.9504	0
	High	HFLLEEDKPEEPTAHAFVSTLTR	2	1	1	41872631		0	169004470	0	3.771e-09	51.85	0.000354976	3	2667.34	0.428197	54.1804	0
	High	cVLLSNLSSTSHVPEVDPGSAELQK	1	1	1	41872631	C1(Carbamidomethyl)	0	8.12713e+07	0	1.453e-09	51.6	0.000396419	3	2667.33	1.10873	56.0655	0
	High	VFTTVGSAEK	1	1	1	41872631		0	26051479	0	0.0001382	50.92	0.000249202	1	1038.55	-0.254752	22.7509	0
	High	DGLLENQTPEFFQDVcKPK	1	1	1	41872631	C16(Carbamidomethyl)	0	1.08277e+07	0	1.122e-06	50.76	0.000493183	2	2265.09	1.73587	59.4661	0
	High	VYQWDDPDPR	1	1	1	41872631		0	164243692	0	0.0001876	50.72	0.000185543	2	1290.57	-0.372555	36.4089	0
	High	QEPLLIGSTK	1	1	1	41872631		0	8.3122e+06	0	0.0001015	50.22	0.000328909	1	1085.62	0.643244	35.4113	0
	High	AQVADVVVSR	2	1	1	41872631		0	97915546	0	0.0002456	49.59	0.000402236	1	1043.58	-0.437833	27.3814	0
	High	GLKPScTIIPLMK	2	1	1	41872631	C6(Carbamidomethyl)	0	1.79466e+08	0	4.73e-05	49.06	0.000340213	2	1457.82	-1.41546	50.6691	0
	High	LFDHPESPTPNPTEPLFLAQAEVYK	1	1	1	41872631		0	219564070	0	1.824e-08	47.87	0.000929207	3	2840.41	-0.140398	64.1648	0
	High	cTVFHGAQVEDAFR	1	1	1	41872631	C1(Carbamidomethyl)	0	7.79349e+07	0	3.436e-06	47.02	0.000820257	2	1636.75	0.363377	42.5372	0
	High	LGMLSPEGTcK	2	1	1	41872631	C10(Carbamidomethyl)	0	2.37233e+08	0	0.0001012	46.7	0.000841288	1	1192.57	-1.78784	33.303	0
	High	SNMGHPEPASGLAALAK	2	1	1	41872631		0	100250827	0	9.751e-08	46.08	0.00132673	3	1650.83	0.0903908	39.1918	0
	High	KDHRDNLEFFLAGIGR	1	1	1	41872631		0	2.36661e+07	0	0.0001006	43.68	0.00218774	3	1887.99	1.65709	59.054	2
	High	VAAAVDLIIK	1	1	1	41872631		0	4.35518e+07	0	4.135e-05	42.16	0.000732803	2	1012.64	-0.409058	51.7573	0
	High	DGAWGAFR	1	1	1	41872631		0	9.03396e+07	0	0.007311	41.16	0.00235421	2	879.41	-1.19932	39.8525	0
	High	MVVPGLDGAQIPR	2	1	1	41872631		0	419250594	0	5.421e-05	40.67	0.00264825	2	1352.74	1.49706	54.484	0
	High	VVVQVLAEEPEAVLK	2	1	1	41872631		0	1.55654e+08	0	0.0002349	40.65	0.00105472	2	1622.93	-1.0483	60.6547	0
	High	YHGNVMLLR	2	1	1	41872631		0	2.03956e+08	0	0.00111	39.9	0.00471226	1	1102.58	0.766204	33.0007	0
	High	GILADEDSSRPVWLK	2	1	1	41872631		0	113813544	0	2.752e-06	39.04	0.00571925	2	1685.88	-1.38257	51.0749	0
	High	SLLVNPEGPTLMR	1	1	1	41872631		0	4.22511e+08	0	0.002939	38.35	0.00425494	2	1426.78	2.68391	54.5755	0
	High	LQLNGNLQLELAQVLAQERPK	1	1	1	41872631		0	3.26877e+07	0	2.675e-07	38.09	0.00161448	3	2375.34	1.76414	67.4288	0
	High	ELNLVLSVR	1	1	1	41872631		0	1.88893e+07	0	0.0003245	37.78	0.00380132	2	1042.63	1.37098	54.3649	0
	High	RPTPQDSPIFLPVDDTSFR	2	1	1	41872631		0	3.38072e+08	0	3.191e-05	35.62	0.0138998	2	2188.1	-0.711603	60.0973	0
	High	SDEAVKPFGLK	2	1	1	41872631		0	1.63652e+08	0	0.0004559	35.23	0.0149958	2	1190.64	-0.600148	31.9076	0
	High	VSVHVIEGDHR	1	1	1	41872631		0	4.04908e+07	0	0.001472	33.84	0.0196198	3	1247.65	-2.21605	19.4023	0
	High	LSIPTYGLQcTR	1	1	1	41872631	C10(Carbamidomethyl)	0	508413866	0	0.001791	32.75	0.0248985	2	1408.72	-2.31543	50.4048	0
	High	SLLVNPEGPTLmR	3	1	1	41872631	M12(Oxidation)	0	2.99199e+07	0	0.000263	31.06	0.0322773	2	1442.77	-1.01308	46.0016	0
	High	FPQLDSTSFANSR	1	1	1	41872631		0	440425703	0	0.000637	30.17	0.0397627	2	1469.7	-0.442101	47.585	0
	High	RGLKPScTIIPLMK	2	1	1	41872631	C7(Carbamidomethyl)	0	4.23204e+07	0	6.475e-05	29.4	0.024226	3	1613.92	-0.558891	43.8705	1
	High	GLVQALQTK	1	1	1	41872631		0	5.90385e+07	0	0.003265	29.15	0.0387963	1	957.572	-1.19679	34.9506	0
	High	AAEQYTPK	1	1	1	41872631		0	8.71122e+06	0	0.004482	28.99	0.057981	2	907.45	-2.13951	12.9036	0
	High	VTAIHIDPATHR	2	1	1	41872631		0	1.23528e+08	0	0.0001798	28.87	0.066221	2	1330.72	-3.2704	23.5642	0
	High	FDASFFGVHPK	2	1	1	41872631		0	8.65336e+07	0	1.093e-05	28.83	0.0493562	3	1251.61	-0.645938	50.0323	0
	High	GTPLISPLIK	1	1	1	41872631		0	1.44393e+08	0	0.002534	28.69	0.00696317	2	1038.65	-1.64729	52.1521	0
	High	cPPGVVPAcHNSK	2	1	1	41872631	C1(Carbamidomethyl); C9(Carbamidomethyl)	0	5.22915e+07	0	5.738e-05	28.43	0.0504575	2	1422.66	-1.24386	15.9587	0
	High	GYAVLGGER	1	1	1	41872631		0	16508459	0	0.001505	28.21	0.0581381	1	921.479	-0.21982	28.1068	0
	High	AALQEELQLcK	1	1	1	41872631	C10(Carbamidomethyl)	0	1.84293e+08	0	0.002597	26.65	0.106622	2	1302.67	0.104078	42.982	0
	High	SFYGSTLFLcR	1	1	1	41872631	C10(Carbamidomethyl)	0	1.09745e+08	0	0.001053	22.74	0.232797	2	1350.65	1.47963	60.519	0
	High	GGNVGINSFGFGGSNVHIILRPNTQPPPAPAPHATLPR	1	1	1	41872631		0	6.24663e+07	0	1.579e-09	22.24	0.141199	4	3858.02	-1.66415	58.7058	0
	High	SEGVVAVLLTK	1	1	1	41872631		0	6240030	0	0.004195	20.08	0.229238	1	1115.67	0.549733	56.8481	0
	High	QVQPEGPYR	2	1	1	41872631		0	9.41801e+07	0	0.003828	16.73	0.782416	1	1073.54	-0.223415	19.0597	0
	High	WTSQDSLLGmEFSGR	1	1	1	41872631	M10(Oxidation)	0	9769798	0	0.0001378	16.35	0.884086	2	1729.79	1.05015	57.6522	0
	High	YSGTLNLDR	1	1	1	41872631		0	1.37595e+07	0	0.004604	15.22	1.17387	1	1038.52	-1.05491	29.9113	0
	High	VGDPQELNGITR	1	1	1	41872631		0	154026808	0	0.0007855	14.83	1.24306	2	1298.67	-0.471389	32.9913	0
	High	VVEVLAGHGHLYSR	1	1	1	41872631		0	5.73734e+07	0	2.56e-05	14.17	1.41837	2	1536.83	-1.12419	31.7774	0
	High	SLYQSAGVAPESFEYIEAHGTGTK	1	1	1	41872631		0	7.64956e+07	0	2.607e-05	13.98	2.1357	3	2542.21	0.807883	56.6005	0
	High	RQQEQQVPILEK	1	1	1	41872631		0	68781375	0.001	0.01164	28.01	0.046884	2	1495.82	-1.21061	28.7079	1
	High	VmGLVPAK	1	1	1	41872631	M2(Oxidation)	0	6.58145e+06	0.001	0.008792	19.73	0.53686	1	830.481	0.113826	22.782	0
	High	LmSAISK	1	1	1	41872631	M2(Oxidation)	0	4.57237e+06	0.002	0.02553	14.04	1.15576	1	765.418	0.631675	13.7632	0
	High	AGLYGLPR	1	1	1	41872631		0	1.04387e+08	0.003	0.04281	33.95	0.0202768	2	846.482	-1.78887	37.8629	0
	High	HGLYLPTR	1	1	1	41872631		0	2.732e+08	0.004	0.05926	28.63	0.0295425	2	956.53	-1.10016	27.8842	0
	High	LSPDAIPGK	1	1	1	41872631		0	1.30865e+08	0.004	0.05585	17.93	0.316492	2	897.504	-0.595761	25.5117	0
	High	DImLATGK	2	1	1	41872631	M3(Oxidation)	0	5.25471e+06	0.005	0.06713	12.96	2.39761	2	864.447	-3.33558	23.352	0
	High	GMGLSLMR	1	1	1	41872631		0	4.4882e+07	0.007	0.0902	20.37	0.385241	2	864.443	-0.247145	44.5517	0
	Medium	WVcSSLR	1	1	1	41872631	C3(Carbamidomethyl)	0	101049459	0.02	0.2631	18.75	0.591417	2	907.445	-0.272492	28.4384	0
	Medium	SHQGLDR	1	1	1	41872631		0	39931	0.035	0.4652	16.82	0.398262	2	812.402	0.921542	1.46101	0
	Medium	LLSAAcR	1	1	1	41872631	C6(Carbamidomethyl)	0	9.82252e+07	0.04	0.524	15.18	1.92045	2	790.423	-1.50195	16.8727	0
	Medium	VFTTVGSAEKR	1	1	1	41872631		0	0	0.043	0.5455	12.76	1.92003	2	1194.65	-2.26358	19.1422	1
71361682	nuclear mitotic apparatus protein 1 [Homo sapiens]	1320.07	31.73	2	52	52	72	2.66849e+08	2115	238.115	5.78271
	A4	Sequence	# PSMs	# Proteins	# Protein Groups	Protein Group Accessions	Modifications	ΔCn	Area	q-Value	PEP	IonScore	Exp Value	Charge	MH+ [Da]	ΔM [ppm]	RT [min]	# Missed Cleavages
	High	VEFATLQEALAHALTEK	2	1	1	71361682		0	104544967	0	3.77e-10	105.35	1.13196e-09	2	1870.99	2.10014	68.9542	0
	High	HLcQQLQAEQAAAEK	1	1	1	71361682	C3(Carbamidomethyl)	0	4.8924e+07	0	4.699e-09	95.24	1.64575e-08	2	1724.84	-0.971517	25.7827	0
	High	SQAPLESSLDSLGDVFLDSGR	1	1	1	71361682		0	6.80861e+06	0	4.461e-09	91.91	3.36256e-08	2	2193.07	2.82639	70.4472	0
	High	QAQLAQTLQQQEQASQGLR	2	1	1	71361682		0	42818737	0	9.011e-09	88.36	6.55008e-08	2	2126.09	-0.887131	44.4037	0
	High	GEVLGDVLQLETLK	1	1	1	71361682		0	38111479	0	5.052e-08	84.43	9.80774e-08	2	1513.85	0.843572	65.0076	0
	High	AVQAQGGESQQEAQR	1	1	1	71361682		0	9.60413e+06	0	1.461e-07	80.92	3.32943e-07	2	1586.75	-0.419138	10.4748	0
	High	LQQLGEAHQAETEVLR	2	1	1	71361682		0	6.44065e+07	0	2.966e-09	80.7	4.15781e-07	2	1821.94	-0.84308	38.2721	0
	High	QEAATLAANNTQLQAR	1	1	1	71361682		0	3.7368e+07	0	7.087e-08	80.08	4.44241e-07	2	1699.87	-1.0179	29.4457	0
	High	ASMQPIQIAEGTGITTR	1	1	1	71361682		0	124879700	0	4.352e-08	76.17	1.093e-06	2	1773.92	0.056488	51.75	0
	High	QSMAFSILNTPK	1	1	1	71361682		0	81243804	0	9.221e-06	75.04	1.46168e-06	2	1336.69	0.478654	55.797	0
	High	LQAQLNELQAQLSQK	2	1	1	71361682		0	1.04986e+08	0	2.313e-08	71.24	2.15716e-06	2	1711.93	-0.729342	53.243	0
	High	INQLSEENGDLSFK	1	1	1	71361682		0	37858153	0	1.728e-07	70.38	4.39786e-06	2	1593.78	0.382328	42.3876	0
	High	VESLESLYFTPIPAR	1	1	1	71361682		0	8.57551e+07	0	2.647e-07	65.84	1.04116e-05	2	1721.91	0.357348	63.8032	0
	High	QFcSTQAALQAMER	1	1	1	71361682	C3(Carbamidomethyl)	0	4.32608e+07	0	3.691e-07	65.44	9.35861e-06	2	1640.75	-0.455278	47.1869	0
	High	LLQAETASNSAR	3	1	1	71361682		0	184518671	0	2.054e-05	63.63	2.45367e-05	1	1260.65	-2.52904	19.4141	0
	High	LGHELQQAGLK	3	1	1	71361682		0	1.30313e+08	0	0.0001008	62.61	1.31861e-05	1	1193.66	0.0561878	23.8652	0
	High	IHGTEEGQQILK	1	1	1	71361682		0	9.97975e+07	0	8.188e-05	61.25	2.76711e-05	2	1352.71	-2.21519	23.2668	0
	High	ASYAEQLSMLK	2	1	1	71361682		0	9.66519e+07	0	9.391e-05	60.12	3.72562e-05	2	1240.62	-0.243695	48.123	0
	High	VAGIESHSELQISR	2	1	1	71361682		0	1.68588e+07	0	1.83e-07	58.73	5.84099e-05	2	1525.79	-1.70546	32.5759	0
	High	QQNELAELHANLAR	2	1	1	71361682		0	5.21607e+07	0	3.8e-06	54.77	0.000167047	2	1606.83	-1.23036	41.6229	0
	High	VSLEPHQGPGTPESK	1	1	1	71361682		0	1.10628e+08	0	1.002e-06	53.61	0.000226902	2	1562.78	-0.578715	20.8762	0
	High	VAQEKDQLQEQLQALK	1	1	1	71361682		0	6.11944e+06	0	7.55e-06	51.7	0.000212966	2	1869.01	0.0196513	44.0548	1
	High	AHGLLAEENR	2	1	1	71361682		0	6.98075e+07	0	0.0001116	50.58	0.000317182	1	1109.57	-0.134414	18.1167	0
	High	YVQELAAVR	2	1	1	71361682		0	1.11721e+08	0	0.001045	50.04	0.000420608	2	1048.58	-0.884038	32.6877	0
	High	LEILQQQLQVANEAR	1	1	1	71361682		0	0	0	8.451e-05	49.64	0.000362866	2	1752.93	-14.4713	54.3508	0
	High	SQAGVSSGAPPGR	1	1	1	71361682		0	1.04461e+08	0	4.777e-06	43.64	0.00141216	2	1170.59	-0.0103031	13.3009	0
	High	ELGELIPLR	2	1	1	71361682		0	8.69554e+06	0	0.0008787	42.13	0.000881785	1	1039.62	2.17587	56.5308	0
	High	KLDVEEPDSANSSFYSTR	2	1	1	71361682		0	5.30182e+07	0	2.106e-06	39.75	0.00470309	2	2044.95	0.342064	38.0432	1
	High	LADDLSTLQEK	1	1	1	71361682		0	1.05494e+08	0	0.0009418	38.18	0.00697171	2	1232.64	0.757466	35.3462	0
	High	TTQIINITMTK	2	1	1	71361682		0	6.92391e+07	0	0.00048	36.47	0.00746153	2	1263.7	0.909107	45.8528	0
	High	QQNQELQEQLR	1	1	1	71361682		0	71532956	0	0.001397	36.46	0.00855196	2	1413.71	2.45039	25.3772	0
	High	LSQLEEHLSQLQDNPPQEK	1	1	1	71361682		0	4.94434e+06	0	4.3e-07	33.2	0.0266836	2	2233.11	0.794597	44.0692	0
	High	ASYAEQLSmLK	1	1	1	71361682	M9(Oxidation)	0	12275878	0	0.0001843	31.98	0.0243406	2	1256.62	0.988864	43.3616	0
	High	KVEELQAcVETAR	1	1	1	71361682	C8(Carbamidomethyl)	0	2.16332e+07	0	2.797e-05	31.27	0.0387407	2	1532.77	-0.759861	27.6608	1
	High	ELSAALQDK	1	1	1	71361682		0	2.22666e+06	0	0.004793	31.04	0.0389588	1	974.514	-1.34755	23.7157	0
	High	KHPSSPEcLVSAQK	1	1	1	71361682	C8(Carbamidomethyl)	0	2.36251e+07	0	0.0002858	27.05	0.098128	2	1567.79	-2.13087	19.4258	1
	High	LQNALNEQR	2	1	1	71361682		0	8.75827e+07	0	0.00122	26.97	0.0625832	1	1085.57	-2.60204	17.7263	0
	High	SAPASQASLR	1	1	1	71361682		0	2.62228e+07	0	0.001046	26.49	0.0991796	1	987.522	-0.165879	14.5006	0
	High	ATQEWLEK	2	1	1	71361682		0	36351067	0	0.006708	26.49	0.10075	2	1004.5	-0.76298	28.2041	0
	High	VLEGSELELAK	1	1	1	71361682		0	4.20624e+06	0	0.0002058	25.94	0.11257	1	1187.65	0.303447	39.8207	0
	High	DQLQEQLQALK	1	1	1	71361682		0	1.04593e+08	0	0.003277	25.03	0.10505	2	1313.7	-1.04579	47.1824	0
	High	LGSPDYGNSALLSLPGYRPTTR	2	1	1	71361682		0	2.5626e+08	0	0.0001706	21.76	0.302397	3	2335.2	0.350679	57.4158	0
	High	QPEWLEEQQGR	1	1	1	71361682		0	4.33246e+07	0	0.004739	21.7	0.254883	2	1399.66	0.0518331	35.0996	0
	High	AQELGHSQSALASAQR	1	1	1	71361682		0	6.68759e+07	0	0.0001665	21.19	0.376362	3	1653.83	-1.01754	20.3413	0
	High	NSFYMGTcQDEPEQLDDWNR	1	1	1	71361682	C8(Carbamidomethyl)	0	5.88674e+06	0	1.817e-05	20.07	0.132841	3	2505.01	0.198354	56.7965	0
	High	APVPSTcSSTFPEELSPPSHQAK	1	1	1	71361682	C7(Carbamidomethyl)	0	6.42061e+07	0	3.418e-05	18.4	0.787042	3	2454.16	-2.2826	42.0017	0
	High	IAELQQR	1	2	1	71361682		0	3.59768e+08	0.001	0.01282	18.65	0.436667	2	857.483	-1.54956	16.8773	0
	High	LPPKVESLESLYFTPIPAR	1	1	1	71361682		0	4.71318e+07	0.001	0.01505	16.29	0.486374	3	2157.2	0.857368	63.386	1
	High	TGDPQETLR	1	1	1	71361682		0	3.12428e+07	0.001	0.009665	13.64	1.40134	2	1016.5	-0.642072	16.4925	0
	High	AQADLALEK	1	1	1	71361682		0	2.28592e+07	0.001	0.0181	11.23	3.22436	2	958.519	-1.72757	24.0704	0
	High	QAASPLEPK	1	1	1	71361682		0	2.17392e+06	0.002	0.03403	15.29	0.674427	1	940.508	-1.92944	18.0097	0
	High	ALQQVQEK	1	1	1	71361682		0	0	0.003	0.0481	12.44	1.84733	2	943.519	-1.90012	12.7744	0
	Medium	KLGNSLLR	1	1	1	71361682		0	1.36816e+07	0.013	0.1741	24.67	0.0721623	2	900.561	-2.12733	23.0113	1
13654237	DNA-dependent protein kinase catalytic subunit isoform 1 [Homo sapiens]	1161.46	20.93	2	73	73	81	1.12855e+08	4128	468.788	7.12256
	A4	Sequence	# PSMs	# Proteins	# Protein Groups	Protein Group Accessions	Modifications	ΔCn	Area	q-Value	PEP	IonScore	Exp Value	Charge	MH+ [Da]	ΔM [ppm]	RT [min]	# Missed Cleavages
	High	IMEFTTTLLNTSPEGWK	1	2	1	13654237		0	1.37808e+07	0	1.143e-08	102.2	2.90735e-09	2	1967.98	2.82168	66.2156	0
	High	STVLTPMFVETQASQGTLQTR	1	2	1	13654237		0	4.55385e+06	0	1.549e-08	86.4	1.20041e-07	2	2295.17	1.41131	60.2053	0
	High	IIANALSSEPAcLAEIEEDK	1	2	1	13654237	C12(Carbamidomethyl)	0	1.11408e+07	0	1.356e-08	82.91	2.72471e-07	2	2173.07	2.1246	60.1327	0
	High	LQYFMEQFYGIIR	1	2	1	13654237		0	10820725	0	8.248e-07	81.91	3.54293e-07	2	1707.86	0.708633	70.026	0
	High	VEQLFQVMNGILAQDSAcSQR	1	2	1	13654237	C18(Carbamidomethyl)	0	1.59131e+07	0	8.403e-11	75.7	1.52341e-06	3	2394.16	0.379319	69.3339	0
	High	ATQQQHDFTLTQTADGR	1	2	1	13654237		0	8.2565e+06	0	3.334e-08	72.26	2.76643e-06	2	1917.9	-1.3024	28.363	0
	High	cLMDQATDPNILGR	1	2	1	13654237	C1(Carbamidomethyl)	0	4.5527e+07	0	1.489e-06	70.32	3.40466e-06	2	1603.76	2.50317	49.2382	0
	High	SLGTIQQccDAIDHLcR	1	2	1	13654237	C8(Carbamidomethyl); C9(Carbamidomethyl); C16(Carbamidomethyl)	0	9.67867e+06	0	1.106e-07	69	3.9782e-06	2	2046.92	0.824927	45.8982	0
	High	LAGANPAVITcDELLLGHEK	2	2	1	13654237	C11(Carbamidomethyl)	0	9.07493e+07	0	6.56e-08	66.93	9.76329e-06	2	2121.1	-0.276227	58.3918	0
	High	MVSAVLNGMLDQSFR	1	2	1	13654237		0	2.04248e+07	0	6.369e-07	63.73	2.20718e-05	2	1667.83	2.21923	64.7307	0
	High	LLALNSLYSPK	1	2	1	13654237		0	8.63295e+07	0	0.0003314	58.91	2.4549e-05	2	1218.71	0.28803	56.3287	0
	High	ELLNPVVEFVSHPSTTcR	1	2	1	13654237	C17(Carbamidomethyl)	0	2.08054e+07	0	1.576e-08	57.94	9.20777e-05	2	2085.04	0.0332511	62.162	0
	High	LNESTFDTQITK	1	2	1	13654237		0	46178502	0	6.547e-05	55.02	0.000165572	2	1396.69	-2.11129	37.209	0
	High	VVQMLGSLGGQINK	2	2	1	13654237		0	9.20205e+07	0	3.037e-06	54.97	0.000122114	2	1443.8	-1.10991	49.5966	0
	High	QITQSALLAEAR	1	2	1	13654237		0	4.23289e+07	0	2.876e-05	53.42	0.000171758	2	1300.72	-1.80608	40.789	0
	High	INQVFHGScITEGNELTK	2	2	1	13654237	C9(Carbamidomethyl)	0	3.27203e+07	0	2.185e-08	52.16	0.000296162	2	2046.99	-1.19986	39.6483	0
	High	LLEEALLR	1	2	1	13654237		0	6.0105e+07	0	0.0004303	51.1	0.000171162	2	956.578	0.000990184	47.3196	0
	High	ILDVMYSR	1	2	1	13654237		0	3.1036e+07	0	0.0006039	50.54	0.000277729	2	996.516	-2.65796	40.3286	0
	High	DQNILLGTTYR	1	2	1	13654237		0	6.94824e+07	0	0.0003272	47.25	0.000941825	2	1293.68	-0.130072	45.0561	0
	High	HSSLITPLQAVAQR	1	2	1	13654237		0	8.24307e+07	0	7.355e-05	47.25	0.000481272	2	1520.86	0.566068	46.9311	0
	High	HGDLPDIQIK	1	2	1	13654237		0	5.57671e+07	0	0.0001484	46.02	0.000968884	2	1135.61	-1.72694	37.6106	0
	High	LGASLAFNNIYR	1	2	1	13654237		0	8.57178e+07	0	4.535e-05	45.32	0.00113687	2	1338.72	-0.115863	54.8482	0
	High	MAVLALLAK	1	2	1	13654237		0	4.12603e+06	0	9.294e-05	44.62	0.000457315	2	929.586	0.801253	62.0453	0
	High	HDVGAYMLMYK	1	2	1	13654237		0	1.81547e+07	0	7.225e-06	44.58	0.00134284	2	1327.62	-0.669337	45.2255	0
	High	KNILEESLcELVAK	1	2	1	13654237	C9(Carbamidomethyl)	0	7.37425e+06	0	6.31e-06	44.45	0.00147158	2	1645.88	0.202372	65.3427	1
	High	QcLPSLDLScK	1	2	1	13654237	C2(Carbamidomethyl); C10(Carbamidomethyl)	0	3.25108e+07	0	0.001374	44.4	0.00142508	2	1320.63	-0.0769802	45.4647	0
	High	YScFALFVK	1	2	1	13654237	C3(Carbamidomethyl)	0	1.09969e+07	0	0.0002318	43.83	0.00223353	2	1134.57	2.55386	59.1844	0
	High	QFINLMLPMK	1	2	1	13654237		0	2.11177e+07	0	0.0002353	43.62	0.00182712	2	1234.67	1.40641	65.2607	0
	High	NNWEVSALSR	1	2	1	13654237		0	4.79401e+07	0	8.468e-05	41.42	0.00269334	2	1175.58	-2.42353	41.3434	0
	High	DLLLNTMSQEEK	1	1	1	13654237		0	3.63428e+07	0	1.538e-05	39.5	0.00512762	2	1420.7	-1.54039	48.5369	0
	High	LSFAVPFR	1	2	1	13654237		0	3.35926e+07	0	0.001806	39.05	0.0027006	2	936.531	1.02957	59.0922	0
	High	SPNLWLK	1	2	1	13654237		0	2.4868e+07	0	0.001586	38.95	0.00397333	2	857.486	-1.82457	41.6445	0
	High	IPALDLLIK	1	2	1	13654237		0	3.68498e+07	0	3.659e-05	38.3	0.000244053	2	995.65	0.132324	64.2168	0
	High	SSFDWLTGSSTDPLVDHTSPSSDSLLFAHK	2	2	1	13654237		0	1.09493e+07	0	2.012e-05	38.04	0.00881759	3	3234.53	1.54019	64.8991	0
	High	LLNTWTNR	1	2	1	13654237		0	7.18887e+07	0	0.002251	37.81	0.00764966	2	1017.55	-0.586342	34.1555	0
	High	GYGLFAGPcK	1	2	1	13654237	C9(Carbamidomethyl)	0	4.64174e+06	0	0.001201	36.31	0.00769477	1	1069.51	-0.708647	41.6419	0
	High	AGLLHNILPSQSTDLHHSVGTELLSLVYK	1	2	1	13654237		0	0	0	8.886e-08	35.75	0.00484252	3	3142.7	2.22646	66.6482	0
	High	MYAALGDPK	2	2	1	13654237		0	7.06799e+06	0	0.0009522	34.18	0.0162899	1	965.475	-0.754507	28.1118	0
	High	AQEPESGLSEETQVK	1	2	1	13654237		0	1.91227e+07	0	1.715e-05	30.28	0.0425653	2	1631.77	-1.44268	28.097	0
	High	LPVLAGcLK	2	2	1	13654237	C7(Carbamidomethyl)	0	3.13376e+07	0	0.004627	28.83	0.0360025	2	970.576	0.410028	44.9382	0
	High	LSDFNDITNMLLLK	1	2	1	13654237		0	2.39367e+07	0	1.887e-05	28.24	0.0638116	2	1636.87	3.32321	70.4349	0
	High	LGNPIVPLNIR	1	2	1	13654237		0	8.77979e+07	0	4.431e-05	23.71	0.0265999	2	1205.74	0.377176	55.82	0
	High	NTcTSVYTK	2	2	1	13654237	C3(Carbamidomethyl)	0	0	0	0.00404	22.96	0.113305	1	1073.49	-0.720685	14.1246	0
	High	GFPPSASLcLLDLVK	1	2	1	13654237	C9(Carbamidomethyl)	0	22668890	0	0.001843	22.35	0.225856	2	1616.88	3.48922	70.4844	0
	High	AYVPALQMAFK	1	2	1	13654237		0	1.92631e+07	0	0.0006564	22.25	0.193888	2	1238.66	2.22834	60.1279	0
	High	LGLPGDEVDNK	1	2	1	13654237		0	5.64992e+07	0	0.001257	22.08	0.200079	2	1156.58	-0.836608	33.4893	0
	High	QMFLTQTDTGDDR	1	2	1	13654237		0	8.31379e+06	0	0.003307	21.42	0.199386	2	1527.67	-0.869295	36.4954	0
	High	GKPLPEYHVR	1	2	1	13654237		0	2.51917e+07	0	0.007824	17.09	0.574576	3	1195.66	-1.60256	19.2059	0
	High	KGGSWIQEINVAEK	1	2	1	13654237		0	1.46177e+08	0	0.004806	16.74	1.01046	2	1558.81	-8.55247	47.2204	1
	High	cFGTGAAGNR	1	2	1	13654237	C1(Carbamidomethyl)	0	1.75559e+06	0	0.00134	16.04	0.528882	1	1010.45	-0.210571	15.0677	0
	High	SLGPPQGEEDSVPR	1	2	1	13654237		0	6.35895e+07	0	0.000306	14.37	1.79507	2	1467.71	-0.197847	31.4127	0
	High	YPEETLSLMTK	1	2	1	13654237		0	6.49634e+07	0	0.0004539	12.78	2.04829	2	1311.65	-0.138267	47.3151	0
	High	RYNFPVEVEVPMER	1	2	1	13654237		0	3.97818e+06	0	0.0007004	12.13	3.5302	2	1764.88	1.64617	56.5813	1
	High	TYSVVPMTSR	1	1	1	13654237		0	4.30475e+07	0	0.003838	11.43	2.71232	2	1140.57	-1.0583	34.4221	0
	High	LLQIIER	1	2	1	13654237		0	3.69644e+07	0.001	0.01713	38	0.0022347	2	884.554	-2.18228	41.3459	0
	High	LPLISGFYK	1	2	1	13654237		0	1.97112e+07	0.001	0.01645	28.2	0.0233845	2	1037.6	0.512646	59.6005	0
	High	LLNFLMK	1	2	1	13654237		0	8.87279e+06	0.001	0.01256	21.18	0.137936	2	878.518	1.5535	59.1989	0
	High	EcSPWMSDFK	1	2	1	13654237	C2(Carbamidomethyl)	0	3.40637e+07	0.001	0.01328	20.35	0.0788799	2	1286.52	-0.262341	49.7425	0
	High	SYVAWDR	1	2	1	13654237		0	1.44962e+07	0.001	0.01465	19.79	0.342676	2	896.425	-1.00711	31.9099	0
	High	DYVDLFR	1	2	1	13654237		0	6.01538e+06	0.001	0.008491	18.23	0.404345	2	927.457	-0.0134251	53.5474	0
	High	FLcIFLEK	1	2	1	13654237	C3(Carbamidomethyl)	0	1.28506e+07	0.001	0.01508	17.31	0.497892	2	1069.58	1.03235	62.4575	0
	High	FYGELALK	1	2	1	13654237		0	1.65664e+07	0.001	0.01115	11.55	1.44167	2	940.513	-0.821018	44.6624	0
	High	TETVTSFR	1	2	1	13654237		0	1.81211e+07	0.002	0.03316	31.23	0.0208679	2	940.472	-1.20542	24.3278	0
	High	FIQTFGK	1	2	1	13654237		0	1.92563e+07	0.002	0.03707	27.27	0.0545623	1	840.459	-2.42685	30.4343	0
	High	GIFTSEIGTK	1	2	1	13654237		0	38049451	0.002	0.03057	14.78	1.22086	2	1052.56	-0.925746	40.5152	0
	High	FIVcLNK	1	2	1	13654237	C4(Carbamidomethyl)	0	3.71355e+07	0.002	0.02684	14.54	1.13906	2	893.489	-2.38495	41.1283	0
	High	SIGEYDVLR	1	2	1	13654237		0	4.47009e+06	0.002	0.02919	13.55	1.94512	1	1051.54	-0.948832	41.3899	0
	High	ILDVmYSR	1	2	1	13654237	M5(Oxidation)	0	4.13106e+06	0.002	0.02324	11.02	2.46296	2	1012.51	-1.45179	33.6891	0
	High	HNLEIIK	1	2	1	13654237		0	0	0.003	0.0412	28.97	0.0195218	1	866.508	-1.9028	23.4654	0
	High	SVGPDFGK	1	2	1	13654237		0	5.55582e+06	0.003	0.04564	15.38	1.32553	1	806.403	-1.79591	22.6812	0
	High	TWEGWEPWM	1	2	1	13654237		0	1.98975e+06	0.004	0.05837	14.1	0.426004	1	1221.5	-1.20193	69.6959	0
	Medium	SIELFYK	1	2	1	13654237		0	1.53253e+07	0.017	0.2309	11.08	1.43879	2	899.487	0.0344488	46.7929	0
	Medium	LLPAELPAKR	1	2	1	13654237		0	2.1995e+07	0.023	0.307	20.1	0.0429984	2	1107.69	-2.09127	30.9684	1
	Medium	FVPLLPGNR	1	2	1	13654237		0	1.00368e+08	0.025	0.351	13.5	0.792863	2	1012.59	-1.58956	47.0492	0
24430146	nuclear pore complex protein Nup153 isoform 2 [Homo sapiens]	1052.38	43.39	3	46	46	66	3.6214e+08	1475	153.843	8.73389
	A4	Sequence	# PSMs	# Proteins	# Protein Groups	Protein Group Accessions	Modifications	ΔCn	Area	q-Value	PEP	IonScore	Exp Value	Charge	MH+ [Da]	ΔM [ppm]	RT [min]	# Missed Cleavages
	High	IGVSSDSGSINPMSEGFK	1	3	1	24430146		0	1.89973e+08	0	2.12e-11	125.45	1.30149e-11	2	1811.85	0.0501311	49.0728	0
	High	GFDTSSSSSNSAASSSFK	1	3	1	24430146		0	9.21206e+07	0	9.631e-10	101.84	1.66278e-09	2	1753.75	-0.791357	26.4552	0
	High	aSGAGGVGGGGGGK	1	3	1	24430146	N-Term(Acetyl)	0	2.88339e+06	0	9.951e-07	83.17	1.28921e-07	1	1030.5	4.8924	12.0026	0
	High	NEDVcScSTDTSEVPR	1	3	1	24430146	C5(Carbamidomethyl); C7(Carbamidomethyl)	0	2.16548e+07	0	1.468e-08	81.82	7.53018e-08	2	1855.74	-0.408457	25.1346	0
	High	FGVSSSSSGPSQTLTSTGNFK	1	3	1	24430146		0	8.23561e+07	0	2.382e-09	72.64	2.99749e-06	2	2075.99	-0.351165	43.6687	0
	High	VQMTSPSSTGSPMFK	1	3	1	24430146		0	2.64241e+08	0	2.45e-06	70.35	3.79638e-06	2	1584.74	-0.955692	38.7497	0
	High	FGLSSGLSNPVSLTPFQFGVSNLGQEEK	1	3	1	24430146		0	4.35668e+07	0	9.359e-10	69.66	5.34769e-06	3	2939.49	3.05588	70.4276	0
	High	AGSSWQcDTcLLQNK	2	3	1	24430146	C7(Carbamidomethyl); C10(Carbamidomethyl)	0	1.38637e+08	0	1.152e-06	68.69	4.46184e-06	2	1767.78	-0.812252	44.1208	0
	High	IGVSSDSGSINPmSEGFK	2	3	1	24430146	M13(Oxidation)	0	7.3908e+06	0	2.52e-06	65.55	1.37356e-05	2	1827.84	0.761361	39.4198	0
	High	IPSIVSSPLNSPLDR	1	3	1	24430146		0	3.74733e+08	0	4.296e-06	64.23	1.15348e-05	2	1594.88	0.586673	58.0816	0
	High	FVASKPLEEEEMEVPVLPK	1	2	1	24430146		0	3.96396e+07	0	1.816e-07	59.64	4.76398e-05	2	2171.13	0.271662	57.5637	0
	High	GGFSFGNVEPASLPSASVFVLGR	1	3	1	24430146		0	2.07271e+07	0	4.952e-07	58.6	6.70867e-05	2	2295.18	-0.16122	69.9319	0
	High	RIPSIVSSPLNSPLDR	4	3	1	24430146		0	1.91845e+08	0	3.213e-06	58.58	2.69724e-05	2	1750.98	0.508225	52.6946	1
	High	TSQLGDSPFYPGK	1	3	1	24430146		0	4.47446e+08	0	0.0003894	55.95	0.000119426	2	1396.67	-1.84064	40.7913	0
	High	TTLSASGTGFGDK	2	3	1	24430146		0	258022135	0	1.119e-05	52.31	0.000206503	2	1241.6	-0.494503	28.1716	0
	High	KPAFNLSAFGTLSPSLGNSSILK	2	3	1	24430146		0	57800122	0	1.581e-07	48.78	0.00028076	3	2349.28	1.10178	65.8093	0
	High	RcHQGPIKPYQQGR	2	3	1	24430146	C2(Carbamidomethyl)	0	2.32151e+07	0	6.745e-07	46.09	0.0013286	3	1724.88	0.300217	11.6017	1
	High	RPIGSWEcSVccVSNNAEDNK	1	3	1	24430146	C8(Carbamidomethyl); C11(Carbamidomethyl); C12(Carbamidomethyl)	0	2.43918e+07	0	6.706e-08	43.63	0.000901703	3	2482.05	-1.48986	39.9967	0
	High	SHLNFSMLESPALHcQPSTSSAFPIGSSGFSLVK	2	3	1	24430146	C15(Carbamidomethyl)	0	1.11383e+08	0	1.633e-08	42.55	0.00275451	4	3620.76	2.76404	65.5353	0
	High	TAELSGSSSTLEPIISSSAHHVTTVNSTNcK	1	2	1	24430146	C30(Carbamidomethyl)	0	9.7676e+06	0	1.187e-07	42.09	0.0036154	3	3215.55	-0.730058	47.7926	0
	High	SGIDITDFQAK	1	3	1	24430146		0	9.14069e+06	0	0.0002449	41.96	0.00287513	1	1194.6	1.28351	45.915	0
	High	SSFNLGTIETK	1	3	1	24430146		0	7.29704e+06	0	0.0001868	40.76	0.00293391	1	1196.62	0.962772	43.5488	0
	High	cVAcETPKPGTcVK	2	3	1	24430146	C1(Carbamidomethyl); C4(Carbamidomethyl); C12(Carbamidomethyl)	0	6.58322e+07	0	3.385e-07	40.55	0.0031938	2	1606.74	-0.898146	18.7318	0
	High	SVYFKPSLTPSGEFR	1	3	1	24430146		0	2.59463e+08	0	6.001e-07	40.34	0.00483617	2	1714.88	0.195537	48.6668	0
	High	cHQGPIKPYQQGR	1	3	1	24430146	C1(Carbamidomethyl)	0	48247965	0	6.989e-06	38.31	0.00676611	2	1568.77	-1.34403	13.4853	0
	High	SASVAPFTcK	2	3	1	24430146	C9(Carbamidomethyl)	0	148180365	0	9.294e-05	37.03	0.00695516	1	1067.52	0.217157	27.3017	0
	High	NTSLPPLWSPEAER	1	3	1	24430146		0	2.01202e+08	0	1.65e-05	37.03	0.0100662	2	1596.8	0.970035	56.1999	0
	High	FGDQGGFK	1	3	1	24430146		0	4.6502e+07	0	0.004989	35.78	0.00560191	2	855.398	-1.50726	21.6561	0
	High	VQMTSPSSTGSPmFK	2	3	1	24430146	M13(Oxidation)	0	1.47413e+07	0	2.258e-05	33.29	0.0160334	2	1600.73	-0.667315	32.8365	0
	High	VDSQYPPVQR	1	3	1	24430146		0	2.0036e+08	0	0.003462	32.26	0.02499	2	1188.6	-1.37356	21.6582	0
	High	STFSFSMTKPSEK	1	3	1	24430146		0	4.78274e+07	0	0.0001351	31.21	0.0313329	2	1476.7	-2.02882	38.1641	0
	High	TPPEDcEGPFRPAEILK	2	2	1	24430146	C6(Carbamidomethyl)	0	2.0805e+08	0	0.0006652	29.47	0.0549646	2	1955.95	-3.4073	49.1345	0
	High	LmTPKPVSIATNR	2	3	1	24430146	M2(Oxidation)	0	35053050	0	5.196e-05	28.66	0.0522114	3	1443.8	-1.47509	32.062	0
	High	QQHQGILSR	1	3	1	24430146		0	0	0	0.003745	28.37	0.0430088	1	1066.57	-0.510287	14.4981	0
	High	QQEPVTSTSLVFGK	1	3	1	24430146		0	9.55278e+07	0	0.002805	26.63	0.103529	2	1520.8	0.333251	44.9218	0
	High	TTYGGAAAAVR	2	3	1	24430146		0	1.81727e+08	0	0.001265	25.78	0.10094	1	1037.54	-0.593767	20.1982	0
	High	FKKPEGSWDcELcLVQNK	2	3	1	24430146	C10(Carbamidomethyl); C13(Carbamidomethyl)	0	4.72031e+07	0	5.376e-05	24.85	0.201806	3	2238.06	-1.8897	46.1318	1
	High	FGLSSGLSNPVSLTPFQFGVSNLGQEEKKEELPK	1	3	1	24430146		0	4.57002e+07	0	9.622e-07	17.74	0.674752	4	3663.89	0.367691	66.8867	2
	High	FGVSSESKPEEVK	1	3	1	24430146		0	38520626	0	0.00656	16.6	1.09497	3	1422.71	-0.719488	22.7298	0
	High	FKPVIGTWDcDTcLVQNKPEAIK	1	3	1	24430146	C10(Carbamidomethyl); C13(Carbamidomethyl)	0	1.80303e+08	0	1.285e-05	16.39	1.25255	4	2719.36	1.14792	54.0356	0
	High	KPEGSWDcELcLVQNK	1	3	1	24430146	C8(Carbamidomethyl); C11(Carbamidomethyl)	0	4.27001e+07	0	0.0002202	10.34	3.94846	3	1962.91	0.270191	46.8069	0
	High	NTPYQAPVR	2	3	1	24430146		0	1.71988e+08	0.001	0.01612	16.58	0.931893	1	1045.54	-0.651502	20.7699	0
	High	MSSPLADAK	1	3	1	24430146		0	2.12043e+07	0.002	0.03497	21.54	0.300223	1	919.455	-0.749766	24.8247	0
	High	NIVPGWLQR	2	3	1	24430146		0	2.27399e+08	0.003	0.03841	14.41	0.833159	2	1082.61	1.96487	54.4428	0
	High	SPGFASPK	1	2	1	24430146		0	59045329	0.004	0.05338	30.59	0.0431684	2	790.408	-1.71264	17.4053	0
	High	FSKPIGDFK	1	3	1	24430146		0	6.7317e+07	0.006	0.07512	17.84	0.502356	2	1038.56	-0.32763	28.4405	0
	Medium	ILQSLEK	1	3	1	24430146		0	83971489	0.016	0.2083	16.86	1.02104	2	830.498	-0.0912598	24.1856	0
	Medium	FSSPIVK	1	3	1	24430146		0	99082073	0.018	0.2447	24.03	0.109319	2	777.45	-0.789201	28.8473	0
98986457	host cell factor 1 [Homo sapiens]	1040.41	29.09	2	41	41	69	4.48515e+08	2035	208.602	7.45947
	A4	Sequence	# PSMs	# Proteins	# Protein Groups	Protein Group Accessions	Modifications	ΔCn	Area	q-Value	PEP	IonScore	Exp Value	Charge	MH+ [Da]	ΔM [ppm]	RT [min]	# Missed Cleavages
	High	VASSPVMVSNPATR	2	1	1	98986457		0	6.14186e+08	0	4.741e-07	93.7	1.68286e-08	2	1415.73	-0.311366	31.4906	0
	High	VASSPVmVSNPATR	2	1	1	98986457	M7(Oxidation)	0	137701027	0	1.363e-06	70.54	4.69357e-06	2	1431.72	-0.934017	27.7738	0
	High	MVVPTQSAQGTVIGSSPQMSGMAALAAAAAATQK	2	1	1	98986457		0	4.41346e+07	0	7.583e-10	70.29	5.05119e-06	3	3231.62	1.07666	66.5411	0
	High	GDIPPGcAAYGFVcDGTR	4	1	1	98986457	C7(Carbamidomethyl); C14(Carbamidomethyl)	0	23348036	0	6.162e-09	64.57	1.01425e-05	2	1912.83	-0.269205	49.7565	0
	High	IATGHGQQGVTQVVLK	2	1	1	98986457		0	2.38766e+08	0	8.884e-08	61.94	1.57055e-05	2	1635.91	-2.67351	30.1693	0
	High	TIPMSAIITQAGATGVTSSPGIK	1	1	1	98986457		0	0	0	6.693e-07	61.69	1.65345e-05	2	2201.21	9.2742	56.1761	0
	High	LLVFGGMVEYGK	1	1	1	98986457		0	6.51478e+07	0	3.116e-06	61.11	2.89261e-05	2	1312.7	0.579117	61.7442	0
	High	DLWYLETEKPPPPAR	3	1	1	98986457		0	1.23259e+08	0	7.117e-07	60.8	4.0091e-05	2	1811.93	-2.6023	51.2563	0
	High	LVIYGGMSGcR	2	1	1	98986457	C10(Carbamidomethyl)	0	142191767	0	5.282e-05	60.55	3.54182e-05	2	1212.58	-2.08266	38.5273	0
	High	ISVATGALEAAQGSK	1	1	1	98986457		0	72851814	0	6.741e-07	58.9	5.81001e-05	2	1402.75	-1.30647	38.967	0
	High	SPAFVQLAPLSSK	1	1	1	98986457		0	1.14466e+08	0	7.153e-06	56.55	7.13723e-05	2	1344.75	1.00118	54.0644	0
	High	SPDGAHLTWEPPSVTSGK	1	1	1	98986457		0	5.20677e+07	0	3.54e-08	53.22	0.000234404	2	1865.9	-0.600408	43.2368	0
	High	APVTVTSLPAGVR	2	1	1	98986457		0	108442094	0	0.0001289	52.54	7.9399e-05	2	1267.74	-1.49743	41.5851	0
	High	aSAVSPANLPAVLLQPR	2	1	1	98986457	N-Term(Acetyl)	0	1.94541e+08	0	2.661e-06	52.2	9.97236e-05	2	1745.99	1.16336	68.7829	0
	High	SLHSATTIGNK	2	1	1	98986457		0	1.68443e+08	0	5.431e-06	52.03	0.000210856	1	1128.6	-1.81323	13.8335	0
	High	IPPSSAPTVLSVPAGTTIVK	4	1	1	98986457		0	2.65569e+08	0	1.387e-07	50.55	9.33912e-05	2	1935.12	-0.348912	55.7454	0
	High	GPFSEISAFK	2	1	1	98986457		0	146478934	0	0.0001337	48.85	0.000471095	2	1082.55	0.397507	54.9856	0
	High	LGHSFSLVGNK	2	1	1	98986457		0	2.8653e+08	0	0.0001274	47.24	0.00095438	1	1158.62	-1.40795	32.2002	0
	High	VMSVVQTKPVQTSAVTGQASTGPVTQIIQTK	1	1	1	98986457		0	1.05023e+07	0	1.22e-07	46.97	0.000349582	3	3184.73	0.374904	53.1481	0
	High	AGHcAVAINTR	2	1	1	98986457	C4(Carbamidomethyl)	0	1.20804e+08	0	1.827e-05	45.78	0.00102658	1	1169.58	-1.02886	15.954	0
	High	VmTSGTGAPAK	2	1	1	98986457	M2(Oxidation)	0	1.33189e+07	0	2.441e-05	41.98	0.00274783	2	1035.51	-0.257675	9.33857	0
	High	KQELQPGTAYK	1	1	1	98986457		0	6.0203e+07	0	0.002748	41.55	0.00347472	2	1262.67	-1.33248	16.875	1
	High	GYGPATQVR	1	2	1	98986457		0	7.44429e+07	0	0.001699	40.82	0.0039824	2	948.489	-0.319227	19.2637	0
	High	ENQWFDVGVIK	1	1	1	98986457		0	65580862	0	0.0002956	38.93	0.00672955	2	1334.67	0.736551	60.4818	0
	High	NGPPPcPR	3	1	1	98986457	C6(Carbamidomethyl)	0	1.71217e+07	0	0.004938	38.74	0.00428379	2	894.425	0.0694994	11.0436	0
	High	SSTPAQLAFMR	1	1	1	98986457		0	8.62996e+07	0	0.0005101	36.1	0.0114144	2	1208.61	0.0159096	46.6477	0
	High	ESHTAVVYTEK	1	1	1	98986457		0	3.30692e+07	0	0.000158	35.6	0.0136747	2	1263.62	-1.03231	15.5589	0
	High	VTGPQATTGTPLVTMRPASQAGK	1	1	1	98986457		0	0	0	3.247e-05	33.03	0.0203326	2	2269.19	-2.44909	37.6878	0
	High	SPISVPGGSALISNLGK	2	1	1	98986457		0	4.4075e+08	0	4.17e-06	32.87	0.00968281	2	1596.9	0.487573	59.9953	0
	High	cYLFGGLANDSEDPKNNIPR	2	1	1	98986457	C1(Carbamidomethyl)	0	2.9774e+07	0	7.451e-06	29.29	0.0690077	3	2280.07	-0.673617	53.1456	1
	High	TcLPGFPGAPcAIK	1	1	1	98986457	C2(Carbamidomethyl); C11(Carbamidomethyl)	0	1.46941e+08	0	0.000199	29.03	0.0528234	2	1488.73	-1.00884	53.6325	0
	High	AWNNQVccK	2	1	1	98986457	C7(Carbamidomethyl); C8(Carbamidomethyl)	0	1.49929e+08	0	0.003935	25.78	0.0383149	2	1179.5	-0.374746	20.4584	0
	High	GPLPAGTILK	2	1	1	98986457		0	290608939	0	0.001788	21.45	0.0544269	2	966.596	-1.88099	41.7374	0
	High	AVTTVTQSTPVPGPSVPPPEELQVSPGPR	1	1	1	98986457		0	3.26777e+07	0	0.001613	20.45	0.285347	3	2924.54	0.129281	53.9065	0
	High	YDIPATAATATSPTPNPVPSVPANPPK	1	1	1	98986457		0	1.8983e+08	0	6.035e-05	17.84	0.740789	3	2674.37	0.0525024	50.1394	0
	High	SPITIITTK	1	1	1	98986457		0	2.95927e+07	0	0.005389	13.7	0.757179	1	973.593	-0.278307	35.7837	0
	High	VMTSGTGAPAK	1	1	1	98986457		0	1.2089e+08	0.001	0.01625	34.67	0.0161725	2	1019.52	0.497831	12.2435	0
	High	AcAAGTPAVIR	1	1	1	98986457	C2(Carbamidomethyl)	0	3.46106e+06	0.001	0.01573	11.56	2.84181	1	1086.57	-1.23167	23.7107	0
	High	VVGWSGPVPRPR	1	1	1	98986457		0	2.02314e+07	0.005	0.0629	11.52	1.91677	2	1306.74	-0.357335	36.9922	0
	High	LYIWSGR	1	1	1	98986457		0	138190573	0.006	0.07423	28.2	0.0500989	2	894.483	-0.794639	44.2505	0
	Medium	TQGVPAVLK	1	1	1	98986457		0	1.59859e+08	0.01	0.1389	12.58	0.64317	2	912.549	-2.56809	30.8215	0
	Medium	RPMSSPEmK	1	1	1	98986457	M8(Oxidation)	0	0	0.015	0.1932	10.01	3.40216	2	1078.5	-0.834555	8.9263	0
	Medium	KAWNNQVccK	1	1	1	98986457	C8(Carbamidomethyl); C9(Carbamidomethyl)	0	2.51403e+07	0.019	0.2536	25.61	0.0901309	2	1307.6	-2.3913	15.6959	1
58530840	desmoplakin isoform I [Homo sapiens]	985.102	25.15	2	61	61	70	1.47963e+08	2871	331.569	6.81494
	A4	Sequence	# PSMs	# Proteins	# Protein Groups	Protein Group Accessions	Modifications	ΔCn	Area	q-Value	PEP	IonScore	Exp Value	Charge	MH+ [Da]	ΔM [ppm]	RT [min]	# Missed Cleavages
	High	LSLQDAVSQGVIDQDMATR	1	2	1	58530840		0	1.31245e+07	0	6.462e-10	97.27	1.00125e-08	2	2047.01	1.16701	59.5877	0
	High	TMIQSPSGVILQEAADVHAR	1	2	1	58530840		0	7.46353e+06	0	4.431e-09	95.21	1.37694e-08	2	2123.09	0.980719	57.7439	0
	High	GVITDQNSDGYcQTGTMSR	1	2	1	58530840	C12(Carbamidomethyl)	0	1.23002e+07	0	1.585e-08	88.58	2.83592e-08	2	2089.89	-2.81339	30.5239	0
	High	SVQNDSQAIAEVLNQLK	2	2	1	58530840		0	9373250	0	1.454e-08	87.56	7.84862e-08	2	1856.97	1.60447	67.1658	0
	High	LLEAQAcTGGIIHPTTGQK	1	2	1	58530840	C7(Carbamidomethyl)	0	1.53958e+07	0	5.686e-07	85.61	1.31899e-07	2	1995.03	-1.89219	37.2276	0
	High	LLEAQIASGGVVDPVNSVFLPK	1	2	1	58530840		0	1.61558e+07	0	5.72e-10	83.08	8.38927e-08	2	2253.26	3.15979	66.2105	0
	High	VTAMQLYEcQLIDK	1	2	1	58530840	C9(Carbamidomethyl)	0	2.69539e+07	0	3.459e-08	72.32	3.07429e-06	2	1711.84	-0.226916	58.805	0
	High	FGDSNTVMR	2	2	1	58530840		0	5.93202e+07	0	0.0001977	68.98	2.80139e-06	2	1026.47	-1.45488	23.6559	0
	High	SGSLSLTQFADMISLK	1	2	1	58530840		0	8.58494e+06	0	3.072e-06	66.79	9.61198e-06	2	1697.88	4.05323	70.291	0
	High	GFFDPNTEENLTYLQLK	1	2	1	58530840		0	0	0	9.235e-08	65.5	1.45006e-05	2	2028.99	0.245239	64.9905	0
	High	TIADLELHYQEFIR	2	2	1	58530840		0	2.11022e+07	0	3.47e-08	61.66	3.59592e-05	2	1747.9	1.3232	62.0117	0
	High	GGGGYTcQSGSGWDEFTK	1	2	1	58530840	C7(Carbamidomethyl)	0	1.44475e+07	0	2.946e-07	60.44	1.19282e-05	2	1893.77	0.336194	43.744	0
	High	GLPSPYNMSSAPGSR	1	2	1	58530840		0	57946526	0	9.549e-06	55.89	0.000105243	2	1520.71	-2.35233	40.12	0
	High	YcYLQNEVFGLFQK	1	2	1	58530840	C2(Carbamidomethyl)	0	1.16999e+07	0	2.523e-07	53.08	0.000268162	2	1808.87	3.40632	68.2882	0
	High	QQIQNDLNQWK	1	2	1	58530840		0	6.83561e+07	0	0.002784	51.4	0.000311145	2	1414.71	-1.0908	39.5878	0
	High	IEPHTGLLLLSVQK	1	2	1	58530840		0	3.8123e+07	0	3.374e-06	49.73	8.99201e-05	2	1547.91	-1.52831	53.7723	0
	High	SMSFQGIR	1	2	1	58530840		0	34363082	0	0.00136	47.42	0.000542496	2	925.457	0.63785	35.4834	0
	High	QLQNIIQATSR	2	2	1	58530840		0	2.31385e+08	0	5.712e-05	46.47	0.000826179	2	1271.71	-1.11937	38.5343	0
	High	YIELLTR	1	2	1	58530840		0	6.19881e+07	0	0.005111	42.37	0.00118203	2	907.525	0.734882	43.3192	0
	High	LASLEELKR	1	2	1	58530840		0	3.47533e+07	0	0.001196	40.94	0.00252889	2	1058.62	-3.19121	30.6972	1
	High	NTLTQTTENLR	1	1	1	58530840		0	67183392	0	2.703e-05	40.59	0.00476642	2	1290.66	-0.298288	31.525	0
	High	YGDGIQLTR	1	2	1	58530840		0	7.03523e+07	0	0.0006456	40.55	0.00312332	2	1022.53	-0.5709	31.7585	0
	High	IKDFLQGSScIAGIYNETTK	1	2	1	58530840	C10(Carbamidomethyl)	0	2.90609e+06	0	9.891e-07	38.98	0.00690546	2	2245.12	0.868009	58.4371	1
	High	NMPLQHLLEQIK	1	2	1	58530840		0	4.81293e+07	0	9.409e-05	38.57	0.00419071	2	1463.81	2.78021	62.8341	0
	High	SMVEDITGLR	1	2	1	58530840		0	4.22726e+07	0	0.002564	37.53	0.00840634	2	1120.57	0.0613615	48.8581	0
	High	FLEFQYLTGGLVDPEVHGR	1	2	1	58530840		0	3.67437e+06	0	1.274e-06	35.09	0.0157659	2	2177.11	2.54034	66.7908	0
	High	IEVLEEELR	1	2	1	58530840		0	5.49627e+07	0	0.0001665	33.37	0.0221844	2	1129.61	1.11751	46.2762	0
	High	GLVGIEFK	1	2	1	58530840		0	1.83045e+07	0	0.004186	33.2	0.0104341	2	862.503	-0.339684	47.8692	0
	High	TTIHQLTMQK	1	1	1	58530840		0	0	0	0.0002675	32.44	0.0211531	1	1200.64	0.256405	24.257	0
	High	GIHNSIGDYR	2	2	1	58530840		0	1.70068e+07	0	0.0004302	30.79	0.02797	1	1131.55	-0.955063	21.0713	0
	High	NHYNEEMSNLR	1	1	1	58530840		0	29763230	0	0.0006619	29.91	0.0190916	2	1406.61	-1.59009	23.6646	0
	High	LLQLQEQMR	2	2	1	58530840		0	1.17312e+08	0	0.002145	29.56	0.0548332	2	1158.63	0.667688	39.7194	0
	High	LPVEEAYK	1	2	1	58530840		0	0	0	0.004683	28.89	0.058234	1	948.504	0.076847	26.7413	0
	High	NATILELR	1	1	1	58530840		0	1.30115e+07	0	0.008013	26.86	0.0900495	2	929.54	-1.91584	41.4707	0
	High	QLLQEQESVK	1	1	1	58530840		0	1.95613e+07	0	0.003079	25.85	0.109727	2	1201.64	-0.880753	25.7852	0
	High	IQSQFTDAQK	1	2	1	58530840		0	1.42612e+06	0	0.002315	25.66	0.128488	1	1165.58	-2.0795	20.0355	0
	High	LLEAASVSSK	1	2	1	58530840		0	5.84098e+06	0	0.0008403	25.23	0.137512	1	1004.56	-1.3819	23.4606	0
	High	KIQSQFTDAQK	1	2	1	58530840		0	0	0	0.0006173	24.8	0.160764	2	1293.68	0.145275	17.445	1
	High	AELIVQPELK	2	2	1	58530840		0	9.51903e+07	0	0.000359	23.22	0.0562189	1	1139.67	-0.532949	44.1633	0
	High	AQQIHSQTSQQYPLYDLDLGK	1	2	1	58530840		0	5.14997e+07	0	2.312e-06	22.97	0.293713	3	2433.21	0.435335	52.5621	0
	High	GLIDYETFK	1	2	1	58530840		0	5919418	0	0.004742	22.96	0.155794	1	1085.55	0.899887	49.3815	0
	High	VQEQELTR	1	1	1	58530840		0	4.21592e+06	0	0.004317	21.42	0.354064	2	1002.52	-1.23794	15.5724	0
	High	GAGSIAGASASPK	1	2	1	58530840		0	1.76155e+07	0	0.001229	20.91	0.358039	1	1073.56	-0.26238	15.3576	0
	High	AITGFDDPFSGK	2	2	1	58530840		0	94781775	0	0.0004602	18.74	0.487857	1	1254.6	-0.148019	53.1556	0
	High	AEMDMVAWGVDLASVEQHINSHR	1	2	1	58530840		0	1.02881e+07	0	8.151e-05	18.53	0.700705	3	2595.21	-0.431181	67.7552	0
	High	LLQLQEQmR	1	2	1	58530840	M8(Oxidation)	0	8920289	0	0.006093	18.5	0.69285	2	1174.62	-2.59873	30.2327	0
	High	YQAEcSQFK	1	2	1	58530840	C5(Carbamidomethyl)	0	0	0	0.006214	15.87	0.395997	1	1160.5	-1.44238	20.0405	0
	High	SVEEVASEIQPFLR	1	2	1	58530840		0	5.83359e+06	0	0.000588	15.54	1.43676	3	1603.84	2.04532	64.0476	0
	High	KVTAMQLYEcQLIDK	1	2	1	58530840	C10(Carbamidomethyl)	0	2.98445e+06	0	0.001333	13.27	2.4326	2	1839.93	0.253678	51.0336	1
	High	LISPESTVMLLEAQAATGGIIDPHR	1	2	1	58530840		0	2.36409e+07	0	0.0004726	9.62	3.47078	3	2619.39	4.05343	70.5771	0
	High	LEDELNR	1	2	1	58530840		0	0	0.001	0.0112	19.83	0.301577	2	888.442	0.0742938	19.2799	0
	High	NQcTQVVQER	1	2	1	58530840	C3(Carbamidomethyl)	0	2.31771e+07	0.002	0.03541	49.22	0.000369793	2	1261.59	-1.17758	15.8309	0
	High	RQDSLESMK	1	2	1	58530840		0	1.51704e+07	0.002	0.02756	28.17	0.0565424	2	1093.53	-1.34326	15.5703	1
	High	VSYVQLK	1	2	1	58530840		0	2.82726e+07	0.002	0.02764	22.82	0.105002	2	836.486	-1.67085	29.0039	0
	High	FLSEMLK	1	2	1	58530840		0	3.71401e+07	0.003	0.03903	30.24	0.0240344	2	867.463	-1.30937	43.93	0
	High	NKYETEINITK	1	1	1	58530840		0	1.09666e+07	0.003	0.03936	14.31	1.41229	2	1352.7	-1.38859	28.8681	1
	High	LVFDGLR	1	2	1	58530840		0	2.1221e+07	0.004	0.05717	10.9	2.53197	1	819.472	-0.0124663	44.8028	0
	High	AFIGFEGVK	1	2	1	58530840		0	3.75281e+07	0.006	0.0755	10.83	2.31291	2	967.526	1.73072	49.2117	0
	High	FLDQNLQK	1	2	1	58530840		0	7.8453e+06	0.007	0.09264	19.81	0.445051	1	1005.54	-0.155546	27.8594	0
	High	IVQLKPR	1	2	1	58530840		0	6.31212e+06	0.007	0.09746	16.02	0.0950131	1	853.562	-0.300877	17.1076	0
	Medium	VVLVDRK	1	2	1	58530840		0	0	0.026	0.3618	14.63	0.805779	2	828.529	-1.26722	15.0823	1
	Medium	ALcDYKQDQK	1	2	1	58530840	C3(Carbamidomethyl)	0	1.68422e+06	0.044	0.5511	18.73	0.508407	2	1268.59	-1.31843	13.6606	1
33946327	nuclear pore complex protein Nup214 [Homo sapiens]	784.376	25.69	1	34	34	53	3.87506e+08	2090	213.488	7.47412
	A4	Sequence	# PSMs	# Proteins	# Protein Groups	Protein Group Accessions	Modifications	ΔCn	Area	q-Value	PEP	IonScore	Exp Value	Charge	MH+ [Da]	ΔM [ppm]	RT [min]	# Missed Cleavages
	High	VcATLPSTVAVTSVcWSPK	2	1	1	33946327	C2(Carbamidomethyl); C15(Carbamidomethyl)	0	3.0893e+07	0	5.53e-10	100.93	4.28238e-09	2	2063.03	1.40923	59.8501	0
	High	SHLVHGSSPGVMGTSVATSASK	2	1	1	33946327		0	178038137	0	8.841e-11	88.1	8.41007e-08	2	2097.03	-2.24399	26.0723	0
	High	HGAPSPSHPISAPQAAAAAALR	3	1	1	33946327		0	3.93342e+08	0	6.78e-08	74.36	1.63065e-06	2	2078.09	1.43753	35.5495	0
	High	FAVQDVNDVLDLEWDQHLEQK	1	1	1	33946327		0	2.01322e+07	0	3.556e-07	62.33	3.2602e-05	3	2541.23	3.46679	66.2079	0
	High	QmASQAPAVNTLTESTLK	2	1	1	33946327	M2(Oxidation)	0	1.18145e+07	0	2.807e-08	59.24	6.53396e-05	2	1905.96	0.427058	43.0909	0
	High	TPSIQPSLLPHAAPFAK	2	1	1	33946327		0	2.79139e+08	0	3.02e-08	58.56	3.54558e-05	2	1774.99	0.643584	54.0792	0
	High	TTLLEGFAGVEEAR	1	1	1	33946327		0	5.86833e+07	0	1.508e-06	58.23	7.58335e-05	2	1492.77	1.42267	59.9837	0
	High	SAQGSSSPVPSMVQK	1	1	1	33946327		0	2.03783e+08	0	4.165e-06	57.99	7.18023e-05	2	1489.73	-0.803516	28.8333	0
	High	TScKDDEAVVQAPR	2	1	1	33946327	C3(Carbamidomethyl)	0	7.87758e+06	0	5.729e-06	55.19	0.000139238	2	1575.74	0.068813	19.3079	1
	High	SPGSTPTTPTSSQAPQK	1	1	1	33946327		0	6.71439e+07	0	1.142e-05	53.17	0.000238805	2	1671.82	-1.50479	16.2273	0
	High	QGSLINSLKPSGPTPASGQLSSGDK	1	1	1	33946327		0	1.87743e+08	0	1.631e-07	51.65	0.000289979	3	2426.26	1.1659	43.3165	0
	High	AAPGPGPSTFSFVPPSK	2	1	1	33946327		0	2.80577e+08	0	2.413e-07	51.45	0.000367023	2	1643.84	-1.07021	51.4849	0
	High	NLLIQNKPGDDPNK	1	1	1	33946327		0	46605232	0	0.0001424	48	0.000650599	2	1565.83	-0.998543	25.5138	0
	High	NPFSSASGGFGSTATSNTSNLFGNSGAK	1	1	1	33946327		0	2.86336e+07	0	7.245e-09	47.24	0.000860924	3	2665.21	-0.309991	57.3001	0
	High	GGGFFSGLGGKPSQDAANK	1	1	1	33946327		0	1.28487e+07	0	3.114e-06	46.16	0.00128072	2	1794.88	-0.294648	39.7473	0
	High	SHLVHGSSPGVmGTSVATSASK	2	1	1	33946327	M12(Oxidation)	0	25544849	0	8.536e-08	46.06	0.00137621	3	2113.03	-1.55998	20.0733	0
	High	SEAQLQEIR	2	1	1	33946327		0	5.4411e+07	0	0.0006893	44.56	0.00154501	2	1073.56	-0.313129	25.1253	0
	High	LNHLVDSLQQLR	2	1	1	33946327		0	2.19579e+08	0	0.0005748	40.22	0.00255713	3	1435.8	0.700066	46.2507	0
	High	DSGYLHLLYK	2	1	1	33946327		0	1.66555e+07	0	0.0003083	39.76	0.00477153	1	1208.63	-1.95195	50.7435	0
	High	DSDPVMAGIGEEIAHFQK	2	1	1	33946327		0	3.16347e+07	0	3.814e-09	39.36	0.00555634	2	1943.92	1.28494	64.3278	0
	High	SSATVTGEPPSYSSGSDSSK	2	1	1	33946327		0	1.71872e+07	0	1.525e-06	35.49	0.00987296	2	1930.85	-0.219397	21.8719	0
	High	IIPQGADSTMLATK	1	1	1	33946327		0	4.15993e+08	0	0.003909	32.93	0.0239386	2	1445.77	-0.863695	38.2606	0
	High	VIPcPPFYESDHPVR	1	1	1	33946327	C4(Carbamidomethyl)	0	3.10151e+07	0	3.549e-05	32.14	0.0302111	2	1812.88	1.00539	44.9874	0
	High	HPEIFVNFMEPcYGScTER	1	1	1	33946327	C12(Carbamidomethyl); C16(Carbamidomethyl)	0	2.28571e+07	0	1.976e-05	31.59	0.017613	3	2373.01	2.04055	60.2172	0
	High	QNGTVVQYLPTLQEK	1	1	1	33946327		0	5.01433e+07	0	1.727e-06	30.8	0.0408812	2	1717.91	-0.963601	54.8505	0
	High	TPHPVLTPVAANQAK	1	1	1	33946327		0	3.53183e+08	0	0.002763	29.31	0.0410854	2	1543.86	-1.33953	27.5152	0
	High	TSGVPSGFNFTAPPVLGK	1	1	1	33946327		0	3.27148e+08	0	3.861e-06	27.48	0.0903069	2	1775.94	1.39474	61.5988	0
	High	YGLVFAGGASGLQIFPTK	1	1	1	33946327		0	3.41322e+07	0	1.792e-07	27.12	0.070163	2	1825.99	1.47485	67.4313	0
	High	ETLFNTLANNR	1	1	1	33946327		0	3.41894e+08	0	0.006626	23.28	0.248339	2	1292.66	-0.599049	48.5255	0
	High	SLQPAVAEK	1	1	1	33946327		0	1.88331e+07	0	0.00345	22.96	0.108752	1	942.524	-1.30426	18.6364	0
	High	SAQGSSSPVPSmVQK	1	1	1	33946327	M12(Oxidation)	0	8467283	0	0.003071	21.09	0.363732	2	1505.73	-0.336418	20.4084	0
	High	ASSTSLTSTQPTK	1	1	1	33946327		0	178336232	0	0.002328	17.43	0.839432	2	1308.66	-1.64779	16.2113	0
	High	IFDSPEELPK	1	1	1	33946327		0	3.53636e+06	0.002	0.0243	23.04	0.216266	1	1174.6	-2.36491	41.7919	0
	High	SSVLPSPSGR	3	1	1	33946327		0	9.60597e+07	0.002	0.03154	18.73	0.449462	1	986.527	0.0304484	24.6587	0
	High	SAFLSQR	2	1	1	33946327		0	5.59857e+07	0.004	0.05555	37.6	0.00772452	2	808.429	-3.26048	22.3274	0
	Medium	NVPQVVNVQELK	1	1	1	33946327		0	2.93106e+08	0.03	0.4103	13.77	1.0515	2	1366.77	1.08434	45.8436	0
4507555	thymopoietin isoform alpha [Homo sapiens]	752.483	54.47	2	19	28	44	5.95295e+08	694	75.4456	7.66455
	A4	Sequence	# PSMs	# Proteins	# Protein Groups	Protein Group Accessions	Modifications	ΔCn	Area	q-Value	PEP	IonScore	Exp Value	Charge	MH+ [Da]	ΔM [ppm]	RT [min]	# Missed Cleavages
	High	TYDAASYIcEAAFDEVK	1	1	1	4507555	C9(Carbamidomethyl)	0	3.77473e+07	0	2.638e-09	90.66	2.62858e-08	2	1952.86	0.259592	62.6833	0
	High	AMQADISQAAQILSSDPSR	1	1	1	4507555		0	3.09932e+07	0	2.007e-08	88.22	7.62343e-08	2	1988.97	1.01688	58.9011	0
	High	AYEAAASALQIATHTAFVAK	2	1	1	4507555		0	1.78542e+08	0	1.307e-10	81.99	2.89328e-07	2	2034.07	1.764	61.9813	0
	High	THQALGILSK	2	1	1	4507555		0	3.34884e+08	0	1.065e-05	76.58	3.85724e-07	1	1067.62	-0.307124	27.7804	0
	High	ALEESESSQLISPPLAQAIR	3	1	1	4507555		0	9.05516e+07	0	1.212e-06	75.3	1.23508e-06	2	2139.13	0.641164	59.5302	0
	High	LKSELVANNVTLPAGEQR	1	3	2	4507555;73760405		0	4.47788e+06	0	3.88e-05	71.98	1.67025e-06	2	1939.06	1.14724	39.7679	1
	High	DVYVQLYLQHLTAR	1	3	2	4507555;73760405		0	1.86597e+07	0	1.477e-06	60.04	4.06737e-05	2	1718.92	0.390944	62.5632	0
	High	SSTPLPTISSSAENTR	1	3	2	4507555;73760405		0	343398800	0	1.419e-07	59.31	6.38846e-05	2	1647.82	-0.341426	35.8805	0
	High	DSGSFVAFQNIPGSELMSSFAK	2	1	1	4507555		0	1.07713e+07	0	1.028e-08	57.63	8.68096e-05	2	2319.1	3.13566	70.3549	0
	High	TVVSHSLTTLGLEVAK	2	1	1	4507555		0	9.55445e+07	0	3.239e-07	57.07	4.31939e-05	2	1654.94	0.630151	51.7644	0
	High	SELVANNVTLPAGEQR	1	3	2	4507555;73760405		0	2.13503e+08	0	8.255e-07	56.91	9.88984e-05	2	1697.88	-1.87508	40.1311	0
	High	SHISDQSPLSSK	2	1	1	4507555		0	250649849	0	2.264e-05	51.65	0.000245524	1	1285.64	-0.384173	18.7023	0
	High	FQETEFLSPPR	3	1	1	4507555		0	469422125	0	7.105e-05	49.18	0.000595452	2	1350.67	-1.55897	47.7226	0
	High	MAAHTmGNATVGR	2	1	1	4507555	M6(Oxidation)	0	4.90221e+06	0	2.369e-05	49.06	0.000386775	2	1332.61	-1.7424	11.3767	0
	High	EPLVATNLPGR	2	1	1	4507555		0	4.69108e+08	0	7.133e-05	48.19	0.000342095	2	1166.65	-0.507453	37.3331	0
	High	DIVENIcGR	1	1	1	4507555	C7(Carbamidomethyl)	0	9.7616e+06	0	0.003669	43.52	0.00156733	1	1075.52	-0.779326	34.0489	0
	High	NRPPLPAGTNSK	1	3	2	4507555;73760405		0	382654770	0	0.0002133	42.35	0.0021858	2	1251.68	-0.978272	15.5477	0
	High	GGTLFGGEVcK	2	1	1	4507555	C10(Carbamidomethyl)	0	1.4751e+08	0	0.0003761	41.73	0.00242386	1	1124.54	0.53569	35.5832	0
	High	ETTTGYYK	1	1	1	4507555		0	4.86077e+06	0	0.001642	40.91	0.00214499	1	962.446	-0.790183	14.8978	0
	High	MAAHTMGNATVGR	1	1	1	4507555		0	139002684	0	6.086e-06	40.54	0.00281702	2	1316.62	-1.26813	16.8815	0
	High	PEFLEDPSVLTK	2	3	2	4507555;73760405		0	297195528	0	0.002104	37.03	0.00995717	2	1374.71	-0.573379	53.7631	0
	High	NLFIScK	1	1	1	4507555	C6(Carbamidomethyl)	0	3.59414e+07	0	0.004588	29.81	0.0267448	1	881.455	-0.171654	34.2653	0
	High	IDASELSFPFHESILK	1	1	1	4507555		0	2.04592e+08	0	0.0002648	28.88	0.0694336	3	1832.95	1.8287	63.9084	0
	High	EPTPVLGSGAAAAGR	1	3	2	4507555;73760405		0	2.61414e+08	0	0.000175	28.2	0.0559261	2	1353.71	-0.530335	29.3626	0
	High	YGVNPGPIVGTTR	1	3	2	4507555;73760405		0	847356008	0	0.004907	25.95	0.134672	2	1330.71	-0.0601109	37.3312	0
	High	SGIQPLcPER	2	1	1	4507555	C7(Carbamidomethyl)	0	234700240	0	0.007421	21.54	0.234988	1	1156.58	-0.820458	29.4089	0
	High	GPPDFSSDEEREPTPVLGSGAAAAGR	1	3	2	4507555;73760405		0	3.74295e+07	0	5.31e-06	20.07	0.515622	3	2570.21	0.849402	42.1642	1
	High	SSSSSSQPEHSAMLVSTAASPSLIK	1	1	1	4507555		0	123891535	0	0.0003841	13.78	2.38084	3	2489.22	0.0469999	46.2642	0
	High	EATQILSVPK	2	1	1	4507555		0	254584979	0.002	0.02965	16.93	0.623512	1	1085.62	-1.8305	37.2156	0
150418007	E3 SUMO-protein ligase RanBP2 [Homo sapiens]	722.498	22.61	10	39	56	61	1.43752e+08	3224	357.974	6.20166
	A4	Sequence	# PSMs	# Proteins	# Protein Groups	Protein Group Accessions	Modifications	ΔCn	Area	q-Value	PEP	IonScore	Exp Value	Charge	MH+ [Da]	ΔM [ppm]	RT [min]	# Missed Cleavages
	High	ELVGPPLAETVFTPK	1	1	1	150418007		0	92496981	0	4.844e-08	79.32	3.08163e-07	2	1597.88	0.485462	62.6761	0
	High	NLFASFPTEESSINYTFK	1	1	1	150418007		0	8.2886e+06	0	1.361e-09	76.7	1.25498e-06	2	2095.01	1.66462	65.4463	0
	High	HGLQPALLVHWAEcLQK	2	1	1	150418007	C14(Carbamidomethyl)	0	8.07689e+06	0	2.359e-09	70.23	4.09243e-06	2	2000.05	0.0455817	63.8299	0
	High	IAVAVLEETTR	1	5	1	150418007		0	3.44973e+07	0	2.205e-06	68.77	4.8649e-06	2	1201.68	0.623842	44.7862	0
	High	APGTNVAMASNQAVR	1	1	1	150418007		0	1.20161e+08	0	2.602e-07	68.21	7.49e-06	2	1486.74	-1.36865	26.1988	0
	High	QSLPATSIPTPASFK	1	1	1	150418007		0	4.95267e+07	0	2.843e-07	64.94	1.24884e-05	2	1544.83	1.1098	52.7094	0
	High	YIASVQGSTPSPR	1	1	1	150418007		0	1.85346e+08	0	0.0001858	64.52	1.8701e-05	2	1362.7	-0.381674	26.4442	0
	High	VIPDFVcQGGDITK	1	1	1	150418007	C7(Carbamidomethyl)	0	5.30941e+07	0	1.417e-06	61.25	3.82821e-05	2	1548.77	-0.61932	49.7281	0
	High	FLGLLYELEENTDK	1	1	1	150418007		0	1.33641e+07	0	6.045e-07	57.62	8.10419e-05	2	1683.85	1.62015	68.94	0
	High	LHDSSGSQVGTGFK	1	1	1	150418007		0	47619114	0	9.799e-07	51.45	0.000312239	2	1419.69	0.247806	19.0287	0
	High	GEAGQNLLEMMAcDR	1	5	1	150418007	C13(Carbamidomethyl)	0	2.16976e+07	0	2.209e-06	51.06	0.000204867	2	1694.73	0.471449	61.7465	0
	High	WAEDQNSLLK	1	3	1	150418007		0	9.62733e+06	0	0.000577	50.5	0.000387249	2	1203.6	-1.80052	37.8672	0
	High	SGFEGMFTK	1	1	1	150418007		0	7.77384e+07	0	9.151e-05	49.58	0.000213148	2	1003.46	-0.335452	45.4604	0
	High	IcANHYISPDMK	1	1	1	150418007	C2(Carbamidomethyl)	0	2.30956e+07	0	2.369e-06	48.67	0.000415644	2	1448.66	-1.98783	30.2138	0
	High	QNQTTAISTPASSEISK	1	1	1	150418007		0	3.03304e+07	0	3.773e-07	43.46	0.00260572	2	1762.88	-0.374492	30.0468	0
	High	SVFGTPTLETANK	1	1	1	150418007		0	1.05328e+08	0	0.0002161	43.4	0.00229915	2	1364.7	-1.83828	41.7159	0
	High	SGSSFVHQASFK	1	1	1	150418007		0	0	0	0.007641	42.58	0.00205925	2	1281.61	-11.9304	26.1228	0
	High	LSQSGHMLLNLSR	1	5	1	150418007		0	31873024	0	2.548e-05	42.07	0.00224444	2	1455.77	-1.92316	41.0704	0
	High	LKDAVAHcHEAER	1	4	2	256600210;150418007	C8(Carbamidomethyl)	0	6.3256e+06	0	5.107e-05	41.95	0.00297431	3	1535.74	0.418381	9.78502	1
	High	QNQTTSAVSTPASSETSK	1	1	1	150418007		0	2.38259e+07	0	1.689e-06	39.54	0.00548084	2	1823.86	-1.03649	17.2988	0
	High	TFEEcQQNLMK	1	1	1	150418007	C5(Carbamidomethyl)	0	2.1825e+07	0	7.928e-05	37.78	0.00412644	2	1427.63	-2.04035	33.2491	0
	High	ITPDMTLQNMK	1	1	1	150418007		0	4.98633e+07	0	0.0002553	36.39	0.0111134	2	1291.64	-1.84673	41.7326	0
	High	SSLEWNScVVQTLK	1	8	2	256600210;150418007	C8(Carbamidomethyl)	0	25683953	0	4.764e-06	35.69	0.014352	2	1650.81	-0.397558	55.6706	0
	High	MIcQQVEAIK	1	1	1	150418007	C3(Carbamidomethyl)	0	7.1652e+07	0	0.0006399	35.2	0.0133784	2	1219.62	-0.840177	33.4915	0
	High	EIVETFANK	2	1	1	150418007		0	3.32133e+07	0	0.0001682	34.65	0.0142249	1	1050.55	-0.368039	31.4055	0
	High	SVELNPTQK	2	6	2	256600210;150418007		0	29231997	0	0.005358	34.09	0.0155587	1	1015.54	0.219555	20.6747	0
	High	LLVQHEINTLR	1	6	2	256600210;150418007		0	1.2575e+08	0	0.00149	32.53	0.010583	2	1335.77	-2.02674	37.8649	0
	High	GHFYMHAGSLLLK	1	5	1	150418007		0	4.17942e+07	0	1.892e-05	31.94	0.0296197	2	1473.77	-0.27146	44.2736	0
	High	GHVSLAAELSK	1	1	1	150418007		0	0	0	0.00107	30.24	0.0228516	1	1111.61	-1.80703	29.741	0
	High	STSGEGFQFGK	1	7	2	256600210;150418007		0	2.79296e+07	0	0.001772	29.57	0.028706	2	1144.53	0.0383021	31.5115	0
	High	FGQGDLPKPINSDFR	2	1	1	150418007		0	30051008	0	0.0004371	28.58	0.0717646	2	1690.85	-0.100212	45.7535	0
	High	MGQHSSNVQWR	1	1	1	150418007		0	26769127	0	0.001296	28.44	0.0432521	2	1329.61	0.0998073	19.0059	0
	High	LLLDIPLQTPHK	1	6	2	256600210;150418007		0	4.22605e+07	0	0.0001019	27.72	0.0122557	3	1387.83	0.214765	57.6228	0
	High	VcANHWITTTMNLKPLSGSDR	1	7	2	256600210;150418007	C2(Carbamidomethyl)	0	1.38403e+07	0	1.278e-06	26.87	0.12212	3	2401.18	1.87672	54.4543	0
	High	EGQWDcSVcLVR	1	1	1	150418007	C6(Carbamidomethyl); C9(Carbamidomethyl)	0	60641806	0	0.0005086	23.64	0.105101	2	1508.66	0.827472	46.542	0
	High	EQLLDcEGEDGWNK	1	6	2	256600210;150418007	C6(Carbamidomethyl)	0	5.07726e+06	0	7.313e-05	22.91	0.088521	2	1692.71	-1.29021	41.133	0
	High	SWWDAVcTLIHR	1	8	2	256600210;150418007	C7(Carbamidomethyl)	0	1.81811e+07	0	2.127e-05	21.3	0.308756	3	1543.75	-0.101503	69.219	0
	High	LFPGSPAIYK	1	8	2	256600210;150418007		0	9.41687e+06	0	0.00399	20.3	0.296775	1	1092.61	-0.302745	44.7462	0
	High	SDDMFTFHGPGK	1	1	1	150418007		0	2.3989e+07	0	0.001033	19.21	0.250695	2	1338.58	-0.885465	40.5362	0
	High	LQDVADSFK	1	7	2	256600210;150418007		0	19107398	0	0.002985	17.13	0.760046	2	1022.51	-1.41682	33.3669	0
	High	FGHVDQENSPSFMFQGSSNTEFK	1	1	1	150418007		0	1.01736e+07	0	0.0001559	16.76	0.595687	3	2620.14	-0.0374053	53.3948	0
	High	FGISEPGNQEK	1	7	2	256600210;150418007		0	3.97456e+07	0	0.004319	13.98	1.72976	2	1205.58	-0.195697	28.0587	0
	High	EGFSIPVSADGFK	1	5	2	256600210;150418007		0	36927864	0	0.0002353	13.9	1.85562	2	1353.67	-0.687881	58.6274	0
	High	SGFEGMFIR	1	1	1	150418007		0	3.27693e+06	0	0.003508	11.47	1.56828	1	1043.5	0.335147	55.8561	0
	High	APGTNVAmASNQAVR	1	1	1	150418007	M8(Oxidation)	0	2.39977e+06	0	0.0007511	10.45	3.63333	2	1502.73	-4.875	22.5289	0
	High	YSLSPSK	1	8	2	256600210;150418007		0	1.51439e+07	0.001	0.01152	33.58	0.0123885	1	781.408	-1.56688	18.7497	0
	High	NTFNFGSK	1	1	1	150418007		0	7.89409e+06	0.001	0.01121	21.19	0.138379	1	914.435	-1.31825	29.1686	0
	High	RSDDMFTFHGPGK	1	1	1	150418007		0	1.35531e+07	0.001	0.0136	20.01	0.335227	3	1494.68	0.964122	34.7374	1
	High	YDVGAIR	1	6	2	256600210;150418007		0	1.99347e+07	0.001	0.008798	18.9	0.555236	2	793.42	-0.738533	26.4603	0
	High	FVFGSESVK	1	5	1	150418007		0	2.94109e+07	0.001	0.01409	16.98	0.567266	2	999.515	-0.0473571	39.0989	0
	High	FALVTPK	1	1	1	150418007		0	2.27587e+07	0.002	0.03319	32	0.0147644	2	775.471	0.247392	36.7626	0
	High	FEEAQSILK	1	1	1	150418007		0	0	0.002	0.03405	16.44	0.867088	1	1064.56	0.415993	37.0225	0
	Medium	EPELEDLTR	1	1	1	150418007		0	4.06479e+07	0.012	0.168	14.8	1.12585	2	1101.54	-2.6754	38.6689	0
	Medium	KLPVPLESVK	1	8	2	256600210;150418007		0	2.7273e+06	0.015	0.1961	11.16	0.363658	1	1109.69	-0.604265	38.3411	1
	Medium	IAELLcK	1	14	3	256600210;150418007;10863929	C6(Carbamidomethyl)	0	3.14376e+07	0.016	0.215	18.41	0.689331	2	846.474	-1.30487	30.2952	0
	Medium	KEGSWWHcNScSLK	1	1	1	150418007	C8(Carbamidomethyl); C11(Carbamidomethyl)	0	7.19238e+06	0.02	0.2724	10.81	2.29869	3	1778.77	-1.72829	31.0302	1
	Medium	KIESFGSPK	1	1	1	150418007		0	8.90485e+06	0.043	0.5449	22.2	0.262113	2	992.538	-2.93761	17.7153	1
301601658	double-stranded RNA-specific adenosine deaminase isoform d [Homo sapiens]	675.869	45.65	2	3	36	46	1.97517e+08	931	103.576	8.66064
	A4	Sequence	# PSMs	# Proteins	# Protein Groups	Protein Group Accessions	Modifications	ΔCn	Area	q-Value	PEP	IonScore	Exp Value	Charge	MH+ [Da]	ΔM [ppm]	RT [min]	# Missed Cleavages
	High	IcDYLFNVSDSSALNLAK	1	4	2	301601658;70167032	C2(Carbamidomethyl)	0	35415194	0	3.483e-09	90.57	4.29292e-08	2	2029.99	1.40402	64.4389	0
	High	FQYcVAVGAQTFPSVSAPSK	1	4	2	301601658;70167032	C4(Carbamidomethyl)	0	1.28758e+07	0	1.071e-10	88.73	7.95098e-08	2	2144.05	-0.133457	57.3077	0
	High	MGFTEVTPVTGASLR	1	2	1	301601658		0	2.08453e+08	0	2.694e-06	78.2	7.35591e-07	2	1565.8	0.202354	53.3681	0
	High	cFNTLTNSFQPSLLGR	1	4	2	301601658;70167032	C1(Carbamidomethyl)	0	1.30344e+08	0	2.378e-08	75.88	1.33245e-06	2	1854.92	0.542832	61.7417	0
	High	SVTLGYLFSQGHLTR	1	4	2	301601658;70167032		0	6.87478e+07	0	3.161e-07	70.09	4.28527e-06	2	1678.89	0.205964	59.9813	0
	High	mGFTEVTPVTGASLR	2	2	1	301601658	M1(Oxidation)	0	1.34691e+07	0	1.865e-05	68.25	6.94253e-06	2	1581.79	-1.44683	47.6291	0
	High	GETVNDcHAEIISR	1	4	2	301601658;70167032	C7(Carbamidomethyl)	0	2.39868e+07	0	1.338e-06	66.2	8.57583e-06	2	1600.74	-0.92409	24.3299	0
	High	AIMEMPSFYSHGLPR	2	4	2	301601658;70167032		0	9.94728e+07	0	2.449e-07	66.1	1.2114e-05	2	1735.83	-1.49174	58.5037	0
	High	TAESQTPTPSATSFFSGK	1	4	2	301601658;70167032		0	192129134	0	9.416e-09	64.59	1.72899e-05	2	1843.87	-0.675099	46.7811	0
	High	DGSAFEDGLR	1	4	2	301601658;70167032		0	24395356	0	1.076e-05	61.08	2.09384e-05	2	1066.48	-1.27148	32.8274	0
	High	HPFIVNHPK	1	4	2	301601658;70167032		0	9352810	0	9.595e-05	53.39	0.000225406	1	1088.6	-0.0327981	15.6169	0
	High	FQYcVAVGAQTFPSVSAPSKK	2	4	2	301601658;70167032	C4(Carbamidomethyl)	0	27720931	0	2.836e-05	44.18	0.00198611	2	2272.15	2.23826	52.1028	1
	High	LVDQSGPPHEPK	1	4	2	301601658;70167032		0	9.62368e+07	0	6.336e-05	40.2	0.00488479	2	1303.66	-1.0616	16.0878	0
	High	ILAAIIMK	1	4	2	301601658;70167032		0	2.04871e+07	0	0.001817	40.04	0.00144166	2	872.563	-0.841641	49.8878	0
	High	DMGYGNWISKPQEEK	1	4	2	301601658;70167032		0	3.92696e+07	0	2.528e-06	39.24	0.00577752	2	1781.81	-2.36271	42.0166	0
	High	QGTTPPIWHLTDK	2	4	2	301601658;70167032		0	88986330	0	0.0002216	37.34	0.00891142	2	1493.77	-0.690908	43.859	0
	High	SPVTTLLEcMHK	3	4	2	301601658;70167032	C9(Carbamidomethyl)	0	6.90822e+07	0	2.278e-05	32.8	0.0188931	3	1415.7	0.61616	56.0828	0
	High	TLPLTGSTFHDQIAMLSHR	1	2	1	301601658		0	1.04196e+07	0	9.22e-07	32.07	0.0305157	2	2125.08	-2.06144	58.2593	0
	High	NAEFLTcNIPTSNASNNMVTTEK	1	4	2	301601658;70167032	C7(Carbamidomethyl)	0	2.68025e+07	0	1.534e-07	30.44	0.0410257	3	2556.17	-1.34455	51.1081	0
	High	SHGFAAEFK	1	4	2	301601658;70167032		0	2.20784e+07	0	0.001681	29.73	0.0439491	1	993.477	-1.86266	26.0537	0
	High	YLNTNPVGGLLEYAR	1	4	2	301601658;70167032		0	8776637	0	0.0002768	27.62	0.0822528	3	1679.88	0.699829	63.7861	0
	High	FQVVINGR	1	4	2	301601658;70167032		0	5.1416e+07	0	0.008274	26.21	0.0849627	2	932.532	0.355457	35.4855	0
	High	TKVENGEGTIPVESSDIVPTWDGIR	1	4	2	301601658;70167032		0	13735809	0	0.0002672	13.88	2.20387	3	2699.35	0.244576	59.7372	1
	High	WFPAVcAHSK	2	4	2	301601658;70167032	C6(Carbamidomethyl)	0	29738280	0	0.003269	9.53	3.7496	2	1202.58	0.395175	35.3577	0
	High	NIFLLFK	1	4	2	301601658;70167032		0	1.74932e+07	0.001	0.01047	35.62	0.0027827	1	894.547	1.91997	66.6679	0
	High	KILAAIIMK	1	4	2	301601658;70167032		0	2.23436e+07	0.001	0.01757	27.39	0.00848112	2	1000.66	0.486701	42.39	1
	High	VENGQEPVIK	1	4	2	301601658;70167032		0	1.79415e+07	0.001	0.0202	25.41	0.0843078	2	1112.6	0.421602	19.02	0
	High	QEAADAALR	1	4	2	301601658;70167032		0	5.6704e+06	0.001	0.01294	24.43	0.111599	2	944.479	-0.947582	15.9699	0
	High	VLIGENEK	1	4	2	301601658;70167032		0	7.46908e+06	0.001	0.01021	18.75	0.666094	1	901.497	-2.44721	19.8416	0
	High	AMTILLEEAK	1	4	2	301601658;70167032		0	1.06458e+07	0.001	0.008911	14.69	1.61492	1	1118.62	3.40938	49.2745	0
	High	LGNScEFR	1	4	2	301601658;70167032	C5(Carbamidomethyl)	0	7.46849e+06	0.001	0.008912	14.34	0.960817	1	982.44	-0.78034	20.0831	0
	High	TMLLLSR	1	2	1	301601658		0	2.84632e+07	0.003	0.05144	28.94	0.026869	2	833.491	-0.147289	42.5396	0
	High	FLYSELMK	1	4	2	301601658;70167032		0	9.37312e+07	0.006	0.07937	20.79	0.275532	2	1030.53	0.767326	54.0332	0
	High	TmLLLSR	1	2	1	301601658	M2(Oxidation)	0	0	0.006	0.08028	15.74	0.726719	2	849.485	-1.77459	33.1636	0
	High	LKPPVHYNGPSK	1	4	2	301601658;70167032		0	1.14556e+08	0.009	0.1264	9.77	3.03663	3	1336.74	-0.931548	20.8739	0
	Medium	QMAAEEAMK	1	4	2	301601658;70167032		0	0	0.012	0.1592	16.76	0.554569	1	1008.45	-0.400543	18.8265	0
	Medium	HYPVFENPK	2	4	2	301601658;70167032		0	1.91968e+08	0.012	0.1665	10.76	3.16476	2	1130.56	-0.465053	26.7131	0
	Medium	LTEcQLK	1	4	2	301601658;70167032	C4(Carbamidomethyl)	0	2.70848e+07	0.013	0.175	15.8	1.29672	2	891.459	-1.74478	17.273	0
5453603	T-complex protein 1 subunit beta isoform 1 [Homo sapiens]	636.38	45.98	2	20	20	28	9.9954e+07	535	57.4521	6.45557
	A4	Sequence	# PSMs	# Proteins	# Protein Groups	Protein Group Accessions	Modifications	ΔCn	Area	q-Value	PEP	IonScore	Exp Value	Charge	MH+ [Da]	ΔM [ppm]	RT [min]	# Missed Cleavages
	High	MLPTIIADNAGYDSADLVAQLR	3	2	1	5453603		0	8.25366e+07	0	1.115e-09	112.04	3.13212e-10	2	2347.2	0.934146	67.8445	0
	High	QVLLSAAEAAEVILR	2	2	1	5453603		0	3.14329e+07	0	5.206e-08	91.13	1.18334e-08	2	1582.91	-1.27427	69.6073	0
	High	LGGSLADSYLDEGFLLDK	1	2	1	5453603		0	3.38845e+07	0	4.508e-09	82.47	3.00673e-07	2	1912.96	2.27828	66.4901	0
	High	LTSFIGAIAIGDLVK	1	1	1	5453603		0	0	0	8.04e-09	80.81	8.21552e-08	2	1517.9	2.09432	70.7201	0
	High	EALLSSAVDHGSDEVK	1	2	1	5453603		0	55143287	0	1.213e-07	65.18	1.49267e-05	2	1656.81	-0.330072	35.6306	0
	High	FRQDLMNIAGTTLSSK	2	2	1	5453603		0	3.10978e+07	0	1.403e-05	60.59	4.6573e-05	2	1781.89	-17.6605	52.0398	1
	High	LALVTGGEIASTFDHPELVK	1	2	1	5453603		0	2.454e+07	0	3.34e-08	58.75	4.86069e-05	2	2097.13	2.72481	62.8388	0
	High	KLGGSLADSYLDEGFLLDK	2	2	1	5453603		0	8.3983e+06	0	1.434e-08	56.43	0.000109887	2	2041.05	0.879683	63.4454	1
	High	SLHDALcVLAQTVK	2	2	1	5453603	C7(Carbamidomethyl)	0	1.04104e+08	0	1.955e-06	53.88	0.000131373	2	1554.83	1.61839	61.8719	0
	High	LGGSLADSYLDEGFLLDKK	1	2	1	5453603		0	3.5322e+07	0	8.965e-09	52.61	0.000265092	3	2041.05	-0.143634	62.7011	1
	High	KIHPQTIIAGWR	1	2	1	5453603		0	55885765	0	0.0003888	51.3	0.000108231	2	1419.82	-0.28912	39.4552	1
	High	LIHFSGVALGEAcTIVLR	1	2	1	5453603	C13(Carbamidomethyl)	0	4.79581e+07	0	3.403e-07	46.78	0.000579307	3	1956.08	1.56896	63.6293	0
	High	LAVEAVLR	1	2	1	5453603		0	4.48594e+07	0	0.00144	43.34	0.000725294	2	870.54	-0.657716	42.1334	0
	High	EAVAMESYAK	1	2	1	5453603		0	4.05622e+06	0	0.0002216	38.24	0.00419912	1	1098.51	-0.305527	26.4919	0
	High	TVYGGGcSEmLMAHAVTQLANR	1	2	1	5453603	C7(Carbamidomethyl); M10(Oxidation)	0	2.36466e+07	0	0.000787	28.11	0.0669868	3	2382.1	-1.02513	58.6468	0
	High	IHPQTIIAGWR	2	2	1	5453603		0	1.13222e+08	0	0.002532	25.15	0.0829411	2	1291.73	-0.0348296	45.5805	0
	High	TVYGGGcSEMLMAHAVTQLANR	1	2	1	5453603	C7(Carbamidomethyl)	0	7.13207e+07	0	7.505e-07	24.17	0.169974	3	2366.1	-0.833763	60.6594	0
	High	NIGVDNPAAK	1	2	1	5453603		0	1.08148e+07	0	0.001936	16.54	0.665459	1	998.526	-0.163308	20.6697	0
	High	ILIANTGmDTDK	1	2	1	5453603	M8(Oxidation)	0	4.75553e+06	0.002	0.03601	18.63	0.671047	2	1307.65	-1.71523	28.6183	0
	Medium	VLVDMSR	1	2	1	5453603		0	3.44395e+07	0.01	0.1409	16.83	0.912962	2	819.438	-1.23285	27.3841	0
	Medium	HGINcFINR	1	2	1	5453603	C5(Carbamidomethyl)	0	3.4439e+06	0.016	0.2177	19.28	0.423145	1	1130.55	-0.47358	28.899	0
27436946	lamin isoform A [Homo sapiens]	617.831	50.15	4	31	31	42	3.2715e+08	664	74.0947	7.02002
	A4	Sequence	# PSMs	# Proteins	# Protein Groups	Protein Group Accessions	Modifications	ΔCn	Area	q-Value	PEP	IonScore	Exp Value	Charge	MH+ [Da]	ΔM [ppm]	RT [min]	# Missed Cleavages
	High	MQQQLDEYQELLDIK	1	4	1	27436946		0	3.56103e+07	0	2.045e-07	86.09	1.39995e-07	2	1893.93	3.15073	62.8591	0
	High	SNEDQSMGNWQIK	1	4	1	27436946		0	1.15376e+08	0	1.065e-06	84.54	9.15815e-08	2	1536.67	0.112618	39.0874	0
	High	SVGGSGGGSFGDNLVTR	2	3	1	27436946		0	257185524	0	6.937e-07	67.99	7.05315e-06	2	1566.75	-1.85797	37.9108	0
	High	LADALQELR	2	4	1	27436946		0	2.47102e+08	0	0.0002331	63.53	1.30643e-05	2	1028.57	0.111511	42.1143	0
	High	TALINSTGEEVAMR	1	3	1	27436946		0	1.84693e+08	0	1.251e-05	59.44	5.77915e-05	2	1491.74	-1.56237	39.9828	0
	High	ASASGSGAQVGGPISSGSSASSVTVTR	1	3	1	27436946		0	1.03832e+07	0	8.885e-09	58.86	7.50198e-05	2	2365.16	-1.39187	33.6713	0
	High	AQHEDQVEQYKK	1	4	1	27436946		0	3.50101e+06	0	0.0001102	56.95	7.72025e-05	2	1502.72	-0.490743	11.143	1
	High	SLETENAGLR	1	3	1	27436946		0	3.90165e+06	0	0.001168	56.02	0.000114891	1	1089.55	-1.40364	23.5783	0
	High	EAALSTALSEK	2	4	1	27436946		0	1.0922e+08	0	0.0001101	53.13	0.000235907	1	1119.59	0.0930509	32.3296	0
	High	NSNLVGAAHEELQQSR	1	4	1	27436946		0	85832927	0	1.054e-07	52.86	0.000266826	2	1752.86	-1.91967	34.2991	0
	High	LKDLEALLNSK	3	4	1	27436946		0	1.27624e+08	0	0.000599	52.03	0.000139108	2	1243.73	0.4443	50.0021	1
	High	NIYSEELR	1	4	1	27436946		0	1.12865e+07	0	0.0008207	48.12	0.000699161	1	1023.51	-0.916196	31.2865	0
	High	AAYEAELGDAR	2	3	1	27436946		0	7.17634e+07	0	2.427e-05	47.81	0.000625881	2	1165.55	-0.997377	28.5712	0
	High	mQQQLDEYQELLDIK	1	4	1	27436946	M1(Oxidation)	0	0	0	2.007e-07	46.14	0.00138514	2	1909.92	1.50454	62.0613	0
	High	AQHEDQVEQYK	1	4	1	27436946		0	0	0	0.0001168	46.05	0.000839299	2	1374.63	-1.1586	13.9649	0
	High	DLEALLNSK	1	4	1	27436946		0	2.65788e+07	0	0.0003064	44.65	0.00176354	2	1002.55	1.91437	52.4317	0
	High	LQEKEDLQELNDR	1	3	1	27436946		0	0	0	5.387e-05	41.2	0.00371703	2	1629.81	-1.5866	28.8607	1
	High	AGQVVTIWAAGAGATHSPPTDLVWK	1	4	1	27436946		0	1.86803e+08	0	8.484e-06	38.83	0.005204	3	2533.32	0.17185	63.229	0
	High	EGDLIAAQAR	1	4	1	27436946		0	4.77677e+06	0	0.0005413	38.76	0.00487612	1	1043.55	-0.0839992	24.6303	0
	High	TALINSTGEEVAmR	1	3	1	27436946	M13(Oxidation)	0	8.93431e+06	0	0.001036	38.23	0.00735036	2	1507.74	-0.925918	32.877	0
	High	SGAQASSTPLSPTR	1	3	1	27436946		0	4.41861e+08	0	0.000399	36.66	0.0105298	2	1359.69	-0.549264	20.0569	0
	High	LEAALGEAK	2	4	1	27436946		0	3.20596e+07	0	0.001722	35.57	0.0137279	2	901.499	0.573469	22.0567	0
	High	IDSLSAQLSQLQK	1	4	1	27436946		0	2.82405e+08	0	0.007704	34.35	0.0150953	2	1430.78	-2.49628	50.4002	0
	High	LRDLEDSLAR	1	4	1	27436946		0	6.53919e+07	0	0.003504	33.72	0.0176217	2	1187.64	-0.680966	31.5229	1
	High	QNGDDPLLTYR	1	4	1	27436946		0	80745487	0	0.0005263	32.49	0.0259555	2	1291.62	-2.66031	40.1223	0
	High	ITESEEVVSR	1	3	1	27436946		0	2.73155e+06	0	0.002722	19.59	0.54181	1	1148.58	-0.48222	20.5443	0
	High	EDLQELNDR	1	3	1	27436946		0	15162117	0	0.0009935	18.46	0.333592	2	1131.53	-0.606404	25.6692	0
	High	KQLQDEMLR	1	4	1	27436946		0	2.46893e+07	0.001	0.01416	29.23	0.0564159	2	1160.61	-1.14039	24.379	1
	High	QLQDEMLR	1	4	1	27436946		0	5.01672e+07	0.001	0.009071	23.49	0.211545	2	1032.51	-1.16432	31.133	0
	High	LAVYIDR	2	3	1	27436946		0	5.97139e+07	0.001	0.02222	18.44	0.414618	1	849.483	-0.216884	33.9472	0
	High	LALDMEIHAYR	1	4	1	27436946		0	1.53432e+07	0.001	0.00858	10.09	4.40281	3	1331.68	-0.950341	47.4966	0
	High	LQLELSK	1	3	1	27436946		0	6.80275e+07	0.002	0.02863	27.2	0.094225	2	830.497	-0.973167	35.2373	0
	High	TLEGELHDLR	2	4	1	27436946		0	3.43886e+07	0.006	0.07666	16.47	0.810399	3	1182.61	-0.945075	38.0858	0
157412270	heterogeneous nuclear ribonucleoprotein M isoform b [Homo sapiens]	562.635	48.77	2	25	25	36	2.08888e+08	691	73.5724	8.82178
	A4	Sequence	# PSMs	# Proteins	# Protein Groups	Protein Group Accessions	Modifications	ΔCn	Area	q-Value	PEP	IonScore	Exp Value	Charge	MH+ [Da]	ΔM [ppm]	RT [min]	# Missed Cleavages
	High	GNFGGSFAGSFGGAGGHAPGVAR	1	2	1	157412270		0	4.86881e+07	0	1.228e-12	127.62	8.28582e-12	2	2034.95	-0.405545	45.4509	0
	High	GIGMGNIGPAGMGMEGIGFGINK	2	2	1	157412270		0	3.26088e+07	0	2.23e-09	78.62	7.32364e-07	2	2178.05	0.55743	65.8043	0
	High	aAGVEAAAEVAATEIK	2	2	1	157412270	N-Term(Acetyl)	0	9.76871e+07	0	1.889e-06	65.3	1.26754e-05	2	1542.81	2.68801	67.9878	0
	High	MGAGMGFGLER	2	2	1	157412270		0	8.201e+07	0	2.116e-06	63.23	1.44264e-05	2	1125.52	-0.703487	45.1938	0
	High	LGGAGMER	1	2	1	157412270		0	0	0	0.0005065	59.1	3.93071e-05	2	790.387	-0.977851	14.2277	0
	High	DKFNEcGHVLYADIK	1	2	1	157412270	C6(Carbamidomethyl)	0	1.08152e+07	0	3.08e-06	58.56	7.27228e-05	2	1808.86	-3.02036	38.7087	1
	High	LGSTVFVANLDYK	1	2	1	157412270		0	3.02737e+07	0	2.308e-06	57.56	6.08597e-05	2	1426.76	0.189849	55.1252	0
	High	MGGMEGPFGGGMENMGR	1	2	1	157412270		0	4.7512e+07	0	9.985e-07	53.36	6.71217e-05	2	1714.68	0.15305	52.6996	0
	High	MGLVMDR	1	2	1	157412270		0	3.49973e+07	0	0.006134	46.17	0.000758455	2	821.401	-0.081404	31.6216	0
	High	MGPLGLDHMASSIER	1	2	1	157412270		0	1.73673e+08	0	1.511e-06	42.75	0.0024633	3	1613.77	-2.05557	50.5526	0
	High	MVPAGMGAGLER	3	2	1	157412270		0	160572350	0	0.000312	41.97	0.00229672	2	1188.59	-0.819867	36.2775	0
	High	AFITNIPFDVK	2	2	1	157412270		0	2.0194e+08	0	0.001036	41.15	0.00220616	2	1264.7	2.0189	62.274	0
	High	INEILSNALK	2	2	1	157412270		0	118648563	0	0.000853	39.5	0.00334923	2	1114.65	-0.699485	45.5858	0
	High	FEPYANPTK	2	2	1	157412270		0	1.33532e+07	0	0.0009363	33.14	0.0215225	1	1066.52	-0.147787	25.8092	0
	High	MGPAMGPALGAGIER	1	2	1	157412270		0	2.51052e+08	0	0.0003301	32.01	0.025558	2	1427.71	0.816625	46.253	0
	High	GcAVVEFK	1	2	1	157412270	C2(Carbamidomethyl)	0	0	0	0.004956	31.75	0.0243946	2	909.45	-0.310892	29.2325	0
	High	MEEESGAPGVPSGNGAPGPK	1	2	1	157412270		0	1.30912e+07	0	4.855e-06	31.51	0.027723	2	1867.85	-0.404224	27.6583	0
	High	MGPAmGPALGAGIER	2	2	1	157412270	M5(Oxidation)	0	2.83057e+07	0	0.004594	30.14	0.0382954	2	1443.71	-1.08165	39.9069	0
	High	MGLAMGGGGGASFDR	1	2	1	157412270		0	2.94366e+06	0	3.148e-05	24.94	0.0856074	2	1383.61	-1.28129	43.6442	0
	High	FESPEVAER	1	2	1	157412270		0	45790829	0	0.0052	23.67	0.160647	2	1063.5	-0.670386	25.6623	0
	High	MGAGLGHGMDR	1	2	1	157412270		0	2.13067e+06	0	0.002368	18.84	0.266459	1	1101.49	-2.41211	19.4785	0
	High	GDFFPPERPQQLPHGLGGIGMGLGPGGQPIDANHLNK	1	2	1	157412270		0	3.64915e+07	0	4.014e-05	12.49	2.35601	4	3818.92	1.28343	60.1689	0
	High	MGPAIER	1	2	1	157412270		0	26188782	0.001	0.01349	27.03	0.0413148	2	773.396	-1.47716	20.0641	0
	High	FGSGMNMGR	1	2	1	157412270		0	7.22262e+07	0.002	0.02493	46.54	0.000394839	2	956.406	-1.32851	25.3883	0
	High	LGGAGmER	1	2	1	157412270	M6(Oxidation)	0	1.0754e+06	0.004	0.05983	20.53	0.278369	2	806.382	-0.32927	8.91925	0
	High	MGPVMDR	1	2	1	157412270		0	0	0.009	0.1295	29.01	0.0282607	1	805.369	-0.610528	20.3964	0
	Medium	NLPFDFTWK	1	2	1	157412270		0	1.12905e+08	0.036	0.4725	29.78	0.0401323	2	1167.59	1.40224	65.7945	0
34101286	zinc finger RNA-binding protein [Homo sapiens]	560.331	32.31	1	26	26	35	237835328	1074	116.939	9.0415
	A4	Sequence	# PSMs	# Proteins	# Protein Groups	Protein Group Accessions	Modifications	ΔCn	Area	q-Value	PEP	IonScore	Exp Value	Charge	MH+ [Da]	ΔM [ppm]	RT [min]	# Missed Cleavages
	High	GLTTTGNSSLNSTSNTK	1	1	1	34101286		0	1.44006e+08	0	9.598e-09	98.28	6.53812e-09	2	1682.82	-0.762178	20.4797	0
	High	AGYSQGATQYTQAQQTR	1	1	1	34101286		0	4.34749e+07	0	5.977e-09	97.75	7.87359e-09	2	1858.86	-2.11532	23.4005	0
	High	QAAAAAAAAAATAAWTGTTFTK	2	1	1	34101286		0	5.16946e+07	0	4.08e-10	84.65	1.67956e-07	2	2023.03	2.66504	62.8316	0
	High	VNPDLQVEVKPSIR	1	1	1	34101286		0	5.62527e+07	0	3.254e-06	62.65	1.2875e-05	2	1593.89	-0.637583	39.0665	0
	High	HATIYPTEEELQAVQK	1	1	1	34101286		0	5.13377e+07	0	8.95e-09	61.48	3.87256e-05	2	1856.94	-0.153515	40.9186	0
	High	STPVTSAVQIPEVK	1	1	1	34101286		0	3.38077e+08	0	2.642e-05	55.81	8.2138e-05	2	1455.81	0.464741	46.2461	0
	High	cELcDVScTGADAYAAHIR	1	1	1	34101286	C1(Carbamidomethyl); C4(Carbamidomethyl); C8(Carbamidomethyl)	0	4.08726e+07	0	5.562e-09	54.6	5.96387e-05	3	2168.91	-1.15683	42.9369	0
	High	LVSDSLSEHEK	1	1	1	34101286		0	83220778	0	1.492e-05	53.26	0.000125569	2	1243.62	0.475812	19.0177	0
	High	DPFDTLATMTDQQR	1	1	1	34101286		0	2.46756e+07	0	2.448e-06	50.43	0.00033648	2	1638.75	2.3557	59.1798	0
	High	LcEcSFNDPNAK	1	1	1	34101286	C2(Carbamidomethyl); C4(Carbamidomethyl)	0	8.32759e+07	0	4.798e-06	49.37	0.000164746	2	1454.6	-1.09774	25.9163	0
	High	VFEcISSGIILK	2	1	1	34101286	C4(Carbamidomethyl)	0	4.97565e+07	0	6.115e-05	46.47	0.000811526	2	1365.74	-1.81601	58.2546	0
	High	QPPKPPQIHYcDVcK	2	1	1	34101286	C11(Carbamidomethyl); C14(Carbamidomethyl)	0	65930769	0	0.00151	42.62	0.00269952	2	1866.9	-1.77933	30.3543	0
	High	QLAVISPEK	2	1	1	34101286		0	1.2885e+07	0	7.555e-05	41.23	0.00155191	1	984.571	-1.01478	30.1385	0
	High	STAPAVAYDSK	2	1	1	34101286		0	5.92647e+07	0	0.0002116	33.45	0.0170124	1	1109.55	-1.87753	19.4233	0
	High	VSAVPTNMAAK	1	1	1	34101286		0	3.02836e+07	0	0.0006896	32.73	0.0290134	1	1088.58	-1.13699	24.3366	0
	High	IScAGPQTYK	2	1	1	34101286	C3(Carbamidomethyl)	0	1.77129e+08	0	0.0003076	29.88	0.0346956	1	1124.54	-1.28301	18.3976	0
	High	GSPGLLDPcEKDPFDTLATMTDQQR	1	1	1	34101286	C9(Carbamidomethyl)	0	6957050	0	3.025e-05	26.22	0.125479	3	2792.29	-0.0433656	63.8081	1
	High	MEEEQHHWDDR	1	1	1	34101286		0	2539556	0	0.001249	25.91	0.0217981	2	1511.6	-0.909448	15.1756	0
	High	GSPGLLDPcEK	1	1	1	34101286	C9(Carbamidomethyl)	0	0	0	0.006571	20.56	0.235139	1	1172.55	-6.05504	32.2435	0
	High	VLGMDPLPQMSQR	1	1	1	34101286		0	198299902	0	9.67e-05	16.6	0.945113	2	1471.74	-0.497439	54.0429	0
	High	NVNLVLLcSEKPSK	1	1	1	34101286	C8(Carbamidomethyl)	0	6.74049e+07	0	0.0007778	14.94	1.28411	2	1600.87	-1.02066	44.5708	0
	High	MPDGGYPHGPPGPLGLLGVRPGmPPQPQGPAPLR	1	1	1	34101286	M23(Oxidation)	0	4.79365e+06	0	8.977e-05	12.89	2.07931	4	3426.76	-0.0408573	60.9907	0
	High	MPDGGYPHGPPGPLGLLGVRPGMPPQPQGPAPLR	1	1	1	34101286		0	0	0	6.423e-05	12.01	2.26622	4	3410.76	0.329149	62.5533	0
	High	EGDVTSGMVKDPPDVLDR	2	1	1	34101286		0	16123155	0.002	0.02977	11.27	3.71731	3	1929.92	-0.60861	43.2124	1
	High	IAENLPK	1	1	1	34101286		0	43784491	0.006	0.08287	32.2	0.011539	2	784.455	-1.2766	20.994	0
	High	INFVGGNK	1	1	1	34101286		0	9.53388e+07	0.006	0.07996	32.06	0.0298393	2	848.462	-0.299911	25.1145	0
	High	IVSITER	1	1	1	34101286		0	5.10308e+07	0.006	0.08069	30.24	0.0435742	2	817.476	-2.09117	22.9956	0
	High	VLGMDPLPQmSQR	1	1	1	34101286	M10(Oxidation)	0	7.50524e+06	0.007	0.0981	15.2	1.22761	2	1487.74	0.874579	48.4393	0
40353734	nucleophosmin isoform 2 [Homo sapiens]	553.905	40.38	3	7	7	29	3.81337e+08	265	29.4462	4.61475
	A4	Sequence	# PSMs	# Proteins	# Protein Groups	Protein Group Accessions	Modifications	ΔCn	Area	q-Value	PEP	IonScore	Exp Value	Charge	MH+ [Da]	ΔM [ppm]	RT [min]	# Missed Cleavages
	High	mSVQPTVSLGGFEITPPVVLR	5	3	1	40353734	M1(Oxidation)	0	1.10211e+08	0	1.019e-08	105.01	7.88751e-10	2	2243.22	2.70328	68.5508	0
	High	MSVQPTVSLGGFEITPPVVLR	5	3	1	40353734		0	5.57904e+08	0	3.373e-09	99.54	3.11285e-09	2	2227.21	-0.875827	69.6024	0
	High	TVSLGAGAKDELHIVEAEAMNYEGSPIK	1	3	1	40353734		0	27946143	0	1.416e-08	81.3	4.25141e-07	3	2929.47	1.57169	63.4996	1
	High	MTDQEAIQDLWQWR	8	2	1	40353734		0	357045810	0	1.982e-06	64.72	1.48575e-05	2	1819.84	0.686169	67.6976	0
	High	DELHIVEAEAMNYEGSPIK	2	3	1	40353734		0	5.28807e+07	0	9.608e-09	58.65	7.80542e-05	3	2145.03	3.86027	61.3337	0
	High	mTDQEAIQDLWQWR	1	2	1	40353734	M1(Oxidation)	0	1.7957e+07	0	7.67e-07	44.86	0.00169989	2	1835.84	0.989803	66.0966	0
	High	mQASIEK	2	3	1	40353734	M1(Oxidation)	0	5.3368e+06	0	0.007699	37.78	0.00499341	2	822.403	-0.0630419	9.3365	0
	High	VDNDENEHQLSLR	1	3	1	40353734		0	2.29061e+08	0	0.0003903	36.13	0.0084592	2	1568.73	-2.00612	23.2622	0
	High	mEDSMDMDMSPLRPQNYLFGcELK	1	3	1	40353734	N-Term(Acetyl); C21(Carbamidomethyl)	0	4.49881e+07	0	3.236e-06	33.76	0.0107075	3	2949.26	0.830665	70.0131	0
	High	mEDSMDmDMSPLRPQNYLFGcELK	3	3	1	40353734	N-Term(Acetyl); M7(Oxidation); C21(Carbamidomethyl)	0	2.607e+07	0	3.822e-05	18.3	0.344632	3	2965.26	1.28545	68.9668	0
70167032	double-stranded RNA-specific adenosine deaminase isoform c [Homo sapiens]	546.975	34.46	2	1	34	41	1.71481e+08	1181	130.988	8.60205
	A4	Sequence	# PSMs	# Proteins	# Protein Groups	Protein Group Accessions	Modifications	ΔCn	Area	q-Value	PEP	IonScore	Exp Value	Charge	MH+ [Da]	ΔM [ppm]	RT [min]	# Missed Cleavages
	High	IcDYLFNVSDSSALNLAK	1	4	2	301601658;70167032	C2(Carbamidomethyl)	0	35415194	0	3.483e-09	90.57	4.29292e-08	2	2029.99	1.40402	64.4389	0
	High	FQYcVAVGAQTFPSVSAPSK	1	4	2	301601658;70167032	C4(Carbamidomethyl)	0	1.28758e+07	0	1.071e-10	88.73	7.95098e-08	2	2144.05	-0.133457	57.3077	0
	High	cFNTLTNSFQPSLLGR	1	4	2	301601658;70167032	C1(Carbamidomethyl)	0	1.30344e+08	0	2.378e-08	75.88	1.33245e-06	2	1854.92	0.542832	61.7417	0
	High	SVTLGYLFSQGHLTR	1	4	2	301601658;70167032		0	6.87478e+07	0	3.161e-07	70.09	4.28527e-06	2	1678.89	0.205964	59.9813	0
	High	GETVNDcHAEIISR	1	4	2	301601658;70167032	C7(Carbamidomethyl)	0	2.39868e+07	0	1.338e-06	66.2	8.57583e-06	2	1600.74	-0.92409	24.3299	0
	High	AIMEMPSFYSHGLPR	2	4	2	301601658;70167032		0	9.94728e+07	0	2.449e-07	66.1	1.2114e-05	2	1735.83	-1.49174	58.5037	0
	High	TAESQTPTPSATSFFSGK	1	4	2	301601658;70167032		0	192129134	0	9.416e-09	64.59	1.72899e-05	2	1843.87	-0.675099	46.7811	0
	High	DGSAFEDGLR	1	4	2	301601658;70167032		0	24395356	0	1.076e-05	61.08	2.09384e-05	2	1066.48	-1.27148	32.8274	0
	High	HPFIVNHPK	1	4	2	301601658;70167032		0	9352810	0	9.595e-05	53.39	0.000225406	1	1088.6	-0.0327981	15.6169	0
	High	FQYcVAVGAQTFPSVSAPSKK	2	4	2	301601658;70167032	C4(Carbamidomethyl)	0	27720931	0	2.836e-05	44.18	0.00198611	2	2272.15	2.23826	52.1028	1
	High	LVDQSGPPHEPK	1	4	2	301601658;70167032		0	9.62368e+07	0	6.336e-05	40.2	0.00488479	2	1303.66	-1.0616	16.0878	0
	High	ILAAIIMK	1	4	2	301601658;70167032		0	2.04871e+07	0	0.001817	40.04	0.00144166	2	872.563	-0.841641	49.8878	0
	High	DMGYGNWISKPQEEK	1	4	2	301601658;70167032		0	3.92696e+07	0	2.528e-06	39.24	0.00577752	2	1781.81	-2.36271	42.0166	0
	High	QGTTPPIWHLTDK	2	4	2	301601658;70167032		0	88986330	0	0.0002216	37.34	0.00891142	2	1493.77	-0.690908	43.859	0
	High	SPVTTLLEcMHK	3	4	2	301601658;70167032	C9(Carbamidomethyl)	0	6.90822e+07	0	2.278e-05	32.8	0.0188931	3	1415.7	0.61616	56.0828	0
	High	NAEFLTcNIPTSNASNNMVTTEK	1	4	2	301601658;70167032	C7(Carbamidomethyl)	0	2.68025e+07	0	1.534e-07	30.44	0.0410257	3	2556.17	-1.34455	51.1081	0
	High	SHGFAAEFK	1	4	2	301601658;70167032		0	2.20784e+07	0	0.001681	29.73	0.0439491	1	993.477	-1.86266	26.0537	0
	High	YLNTNPVGGLLEYAR	1	4	2	301601658;70167032		0	8776637	0	0.0002768	27.62	0.0822528	3	1679.88	0.699829	63.7861	0
	High	FQVVINGR	1	4	2	301601658;70167032		0	5.1416e+07	0	0.008274	26.21	0.0849627	2	932.532	0.355457	35.4855	0
	High	TKVENGEGTIPVESSDIVPTWDGIR	1	4	2	301601658;70167032		0	13735809	0	0.0002672	13.88	2.20387	3	2699.35	0.244576	59.7372	1
	High	MGFTELPLTGSTFHDQIAMLSHR	1	2	1	70167032		0	3.8942e+07	0	2.051e-05	11.36	4.56596	4	2589.26	0.837229	64.9955	0
	High	WFPAVcAHSK	2	4	2	301601658;70167032	C6(Carbamidomethyl)	0	29738280	0	0.003269	9.53	3.7496	2	1202.58	0.395175	35.3577	0
	High	NIFLLFK	1	4	2	301601658;70167032		0	1.74932e+07	0.001	0.01047	35.62	0.0027827	1	894.547	1.91997	66.6679	0
	High	KILAAIIMK	1	4	2	301601658;70167032		0	2.23436e+07	0.001	0.01757	27.39	0.00848112	2	1000.66	0.486701	42.39	1
	High	VENGQEPVIK	1	4	2	301601658;70167032		0	1.79415e+07	0.001	0.0202	25.41	0.0843078	2	1112.6	0.421602	19.02	0
	High	QEAADAALR	1	4	2	301601658;70167032		0	5.6704e+06	0.001	0.01294	24.43	0.111599	2	944.479	-0.947582	15.9699	0
	High	VLIGENEK	1	4	2	301601658;70167032		0	7.46908e+06	0.001	0.01021	18.75	0.666094	1	901.497	-2.44721	19.8416	0
	High	AMTILLEEAK	1	4	2	301601658;70167032		0	1.06458e+07	0.001	0.008911	14.69	1.61492	1	1118.62	3.40938	49.2745	0
	High	LGNScEFR	1	4	2	301601658;70167032	C5(Carbamidomethyl)	0	7.46849e+06	0.001	0.008912	14.34	0.960817	1	982.44	-0.78034	20.0831	0
	High	FLYSELMK	1	4	2	301601658;70167032		0	9.37312e+07	0.006	0.07937	20.79	0.275532	2	1030.53	0.767326	54.0332	0
	High	LKPPVHYNGPSK	1	4	2	301601658;70167032		0	1.14556e+08	0.009	0.1264	9.77	3.03663	3	1336.74	-0.931548	20.8739	0
	Medium	QMAAEEAMK	1	4	2	301601658;70167032		0	0	0.012	0.1592	16.76	0.554569	1	1008.45	-0.400543	18.8265	0
	Medium	HYPVFENPK	2	4	2	301601658;70167032		0	1.91968e+08	0.012	0.1665	10.76	3.16476	2	1130.56	-0.465053	26.7131	0
	Medium	LTEcQLK	1	4	2	301601658;70167032	C4(Carbamidomethyl)	0	2.70848e+07	0.013	0.175	15.8	1.29672	2	891.459	-1.74478	17.273	0
207452735	epiplakin [Homo sapiens]	541.625	24.44	1	21	25	26	6.76514e+07	5090	555.279	5.60498
	A4	Sequence	# PSMs	# Proteins	# Protein Groups	Protein Group Accessions	Modifications	ΔCn	Area	q-Value	PEP	IonScore	Exp Value	Charge	MH+ [Da]	ΔM [ppm]	RT [min]	# Missed Cleavages
	High	AVPVWDVLASGYVSR	1	1	1	207452735		0	5.31802e+07	0	8.668e-09	83.39	1.9471e-07	2	1618.86	2.01799	67.271	0
	High	YLEGTScIAGVLVPAK	1	1	1	207452735	C7(Carbamidomethyl)	0	5.76652e+07	0	8.357e-10	81.08	3.56382e-07	2	1677.89	0.735761	57.7317	0
	High	EELLAEFGSGTLDLPALTR	1	1	1	207452735		0	589085	0	1.197e-09	77.8	8.18176e-07	2	2032.06	0.620776	70.0334	0
	High	AVTGYTDPYTGQQISLFQAMQK	1	1	1	207452735		0	6.4099e+06	0	8.057e-08	77.26	1.10598e-06	2	2447.19	0.693608	63.398	0
	High	cVPDPDTGLYMLQLAGR	1	1	1	207452735	C1(Carbamidomethyl)	0	2.13994e+07	0	2.764e-07	68.23	8.83096e-06	2	1905.92	1.74089	64.8769	0
	High	EGQGEGETQEAAAATAAAR	1	1	1	207452735		0	8.09464e+06	0	2.326e-08	63.67	1.69452e-05	2	1817.83	0.048505	25.8498	0
	High	LLEAQIATGGVIDPVHSHR	1	9	2	207452735;41322910		0	9.36692e+06	0	1.481e-09	54.7	9.91119e-05	2	2013.09	0.243936	45.6332	0
	High	QVSASELHTSGILGPETLR	1	1	1	207452735		0	5.9678e+06	0	4.412e-07	53.27	0.000191688	2	1995.05	-1.12471	48.9879	0
	High	GFFDPNTHENLTYLQLLER	1	9	2	207452735;41322910		0	0	0	1.233e-06	52.31	0.000314601	2	2307.14	1.66154	66.4069	0
	High	TLQEVTEMDSVK	1	1	1	207452735		0	2.97207e+07	0	7.077e-06	52.23	0.000309977	2	1379.67	-2.86934	38.7185	0
	High	LALFQAIGK	1	1	1	207452735		0	7.11958e+06	0	0.001843	45.72	0.000332217	2	960.59	2.05805	56.5767	0
	High	GFFDPNTHENLTYVQLLR	1	1	1	207452735		0	65951589	0	2.094e-07	44.24	0.00217546	3	2164.09	2.14219	63.8957	0
	High	GSAVHQLSEELR	2	1	1	207452735		0	43983298	0	0.0001068	39.1	0.00455815	2	1325.68	-1.21785	32.5647	0
	High	MSIYQAMWK	1	1	1	207452735		0	4.29593e+07	0	0.002176	38.81	0.00368263	2	1157.55	0.539436	57.4209	0
	High	ELIQEYGAQSGGLEK	1	1	1	207452735		0	8.01505e+06	0	1.407e-06	37.52	0.00942583	2	1621.81	-1.0852	39.1052	0
	High	VPVDVAYR	1	9	2	207452735;41322910		0	7.93374e+07	0	0.003391	36.98	0.00962147	2	918.504	-0.930532	28.7386	0
	High	LPLEAALR	1	1	1	207452735		0	4.79958e+06	0	0.003193	35.15	0.00284108	2	882.541	-0.233822	42.6332	0
	High	AEIIDQDLYER	1	1	1	207452735		0	4.37088e+06	0	0.000233	25.78	0.126836	2	1364.67	2.55431	42.4946	0
	High	TTVPQLLASVQR	1	1	1	207452735		0	1.76365e+07	0	0.0001932	25.24	0.0731609	2	1312.76	0.160898	57.3174	0
	High	ASLSLWQAMEK	1	1	1	207452735		0	8650657	0	0.00103	23.69	0.212713	2	1263.64	0.333401	59.0777	0
	High	DQVTYQQLR	1	1	1	207452735		0	6.06487e+06	0	0.0005991	18.85	0.549936	2	1150.58	-0.645859	26.862	0
	High	LLEAQIATGGIIDPVHSHR	1	9	2	207452735;41322910		0	2.33272e+06	0	0.0002663	15.71	0.824401	2	2027.1	0.350354	49.8461	0
	High	LSELEPGTGDLR	1	1	1	207452735		0	1.27831e+07	0	0.00657	11.14	3.61107	2	1286.66	-0.665901	36.4453	0
	High	HLWFQGIR	1	1	1	207452735		0	13993595	0.001	0.009818	14.66	1.11827	2	1056.57	-0.599659	47.4537	0
	Medium	RQDLLSR	1	1	1	207452735		0	1.64512e+07	0.016	0.2151	10.2	5.04714	2	887.504	-1.85278	16.142	1
5902122	spectrin beta chain, non-erythrocytic 2 [Homo sapiens]	526.476	13.6	3	23	23	25	3.13284e+07	2390	271.127	6.11279
	A4	Sequence	# PSMs	# Proteins	# Protein Groups	Protein Group Accessions	Modifications	ΔCn	Area	q-Value	PEP	IonScore	Exp Value	Charge	MH+ [Da]	ΔM [ppm]	RT [min]	# Missed Cleavages
	High	SAELGcTVDEVESLIK	1	1	1	5902122	C6(Carbamidomethyl)	0	8283931	0	7.655e-10	100.87	4.31331e-09	2	1749.86	2.16041	66.5313	0
	High	GPEPSAQEQMEGMLcR	1	1	1	5902122	C15(Carbamidomethyl)	0	1.28197e+07	0	2.292e-08	75.08	6.61271e-07	2	1819.78	-0.942427	47.7972	0
	High	MLTAQDVSYDEAR	1	1	1	5902122		0	1.52312e+07	0	3.301e-07	71.96	2.18102e-06	2	1498.68	-1.01052	36.3156	0
	High	VDSANALANGLIAGGHAAR	1	1	1	5902122		0	9557846	0	1.514e-07	71.48	3.70898e-06	2	1777.93	-2.47384	44.2803	0
	High	ALGAAAAGPELAELQEMWK	2	1	1	5902122		0	16761854	0	7.408e-06	67.13	9.68211e-06	3	1956	3.12393	68.5261	0
	High	EANALAAGHPAQAVAINAR	1	1	1	5902122		0	1.80127e+07	0	1.674e-08	64.88	1.47427e-05	2	1844.97	-2.62892	33.2602	0
	High	RWDELETTTQAK	1	1	1	5902122		0	1.23498e+07	0	0.0004624	60.5	4.41169e-05	2	1477.73	-1.33138	29.6446	1
	High	GNLEVLLFTIQSK	1	3	1	5902122		0	3.98953e+06	0	5.221e-06	58.99	2.38485e-05	2	1461.84	2.75775	68.0515	0
	High	SWQNVYcVLR	1	1	1	5902122	C7(Carbamidomethyl)	0	3.42129e+07	0	0.0009431	47.24	0.000898684	2	1324.65	2.08082	56.4628	0
	High	VGDLYSDLR	1	1	1	5902122		0	1.3074e+07	0	0.0003503	44.87	0.00129683	2	1037.52	-2.53886	38.6928	0
	High	LGHELELR	1	1	1	5902122		0	1.6132e+07	0	0.001219	44	0.000981334	2	966.535	-1.47473	26.1826	0
	High	LTLEQGQQLVAEGHPGASQASAR	1	1	1	5902122		0	2.12263e+07	0	1.952e-08	41.72	0.00349275	3	2348.2	0.306111	42.6048	0
	High	LVSSPELGHDEFSTQALAR	2	1	1	5902122		0	2.92123e+07	0	3e-07	37.54	0.00959396	2	2057.03	1.15354	46.9891	0
	High	DQADPQcLFLR	1	1	1	5902122	C7(Carbamidomethyl)	0	3.05601e+07	0	0.0001695	37.34	0.00729704	2	1362.65	-1.06251	50.315	0
	High	VIESTQGLGNDLAGVLALQR	1	1	1	5902122		0	5.75261e+06	0	2.4e-07	35.61	0.00586675	2	2054.13	1.86258	65.4316	0
	High	LLDPEDVNVDQPDEK	1	1	1	5902122		0	6.88736e+06	0	0.000323	30.64	0.0411641	2	1725.82	-1.29906	41.9201	0
	High	LVSQDNFGLELAAVEAAVR	1	1	1	5902122		0	2.03152e+06	0	0.0003163	30.13	0.0425083	3	2002.06	0.837457	70.0877	0
	High	LLLNLELQK	1	1	1	5902122		0	0	0	0.008332	27.96	0.0148759	2	1083.68	-1.8943	58.2572	0
	High	LGLQDGKEYLFQAK	1	1	1	5902122		0	6.55462e+06	0	0.001705	24.92	0.124977	2	1609.86	0.344805	48.841	1
	High	EQWLNGLALPER	1	1	1	5902122		0	9243452	0	0.0007999	22.9	0.201298	2	1425.75	1.47056	60.287	0
	High	LEDLEVVQQR	1	1	1	5902122		0	1.0238e+07	0	0.0006416	16.71	1.12092	2	1228.66	2.67808	36.0209	0
	High	IHGLLEAGR	1	1	1	5902122		0	2.05344e+07	0.001	0.00863	16.96	0.430937	2	965.552	-0.273939	25.1279	0
	Medium	SHRPTLDALR	1	1	1	5902122		0	1.72389e+07	0.011	0.145	20.94	0.234768	2	1165.64	-1.74336	21.0006	0
21264365	nuclear pore complex protein Nup98-Nup96 isoform 1 [Homo sapiens]	523.57	22.72	4	36	36	50	7.89552e+08	1800	195.696	6.3667
	A4	Sequence	# PSMs	# Proteins	# Protein Groups	Protein Group Accessions	Modifications	ΔCn	Area	q-Value	PEP	IonScore	Exp Value	Charge	MH+ [Da]	ΔM [ppm]	RT [min]	# Missed Cleavages
	High	SHLFDGLDDDEPSLANGAFMPK	1	4	1	21264365		0	1.1259e+07	0	2.397e-09	86.84	1.00298e-07	2	2376.09	1.83481	62.4595	0
	High	HSNSNSVDDTIVALNMR	1	4	1	21264365		0	4.59372e+07	0	4.915e-09	80.4	4.39133e-07	2	1872.89	1.99761	46.2878	0
	High	ISEAcSLAQQSGDHR	1	2	1	21264365	C5(Carbamidomethyl)	0	1.85036e+07	0	1.485e-05	73.69	1.36393e-06	2	1658.75	-2.2082	21.5942	0
	High	EVVVYLDDNQKPPVGEGLNR	2	4	1	21264365		0	1.47216e+08	0	4.205e-08	60.77	3.61813e-05	2	2241.15	-0.618209	46.4413	0
	High	HcQLLETPESWAK	1	2	1	21264365	C2(Carbamidomethyl)	0	7.99061e+07	0	1.517e-06	60.67	3.88238e-05	2	1598.76	0.315352	44.9286	0
	High	LLMDMALFMGR	1	2	1	21264365		0	2.55173e+06	0	1.172e-05	57.26	7.4139e-05	2	1297.65	-0.358755	69.6444	0
	High	DSENLASPSEYPENGER	1	4	1	21264365		0	2.39968e+07	0	5.228e-06	56.4	4.93682e-05	2	1893.8	-2.60013	30.1761	0
	High	ITNEKGEcIVSDFTIGR	1	4	1	21264365	C8(Carbamidomethyl)	0	3.88729e+06	0	9.361e-05	54.11	0.000200286	2	1938.93	-14.3612	49.5184	1
	High	LEDYQANR	1	4	1	21264365		0	3.82521e+07	0	0.000614	49.53	0.000383317	2	1008.47	-1.50949	14.8119	0
	High	GEcIVSDFTIGR	1	4	1	21264365	C3(Carbamidomethyl)	0	1.31126e+08	0	0.0002713	45.04	0.00134731	2	1353.65	-0.104352	53.6281	0
	High	LLAPHIGR	1	2	1	21264365		0	2.58771e+07	0	0.004152	43.19	0.000551693	2	876.541	-0.779487	27.7762	0
	High	IEQIQcYSAK	1	2	1	21264365	C6(Carbamidomethyl)	0	4.09448e+07	0	0.0006588	40.94	0.00308863	2	1239.6	-1.79509	26.049	0
	High	HLEALcLFK	2	2	1	21264365	C6(Carbamidomethyl)	0	5.9607e+07	0	0.0005755	39.77	0.00515068	1	1130.6	-0.272685	51.0311	0
	High	SLVGGLLQSK	1	2	1	21264365		0	66804039	0	0.0001166	37.77	0.00448688	2	1001.6	-0.157531	47.2136	0
	High	HQcITAmK	3	4	1	21264365	C3(Carbamidomethyl); M7(Oxidation)	0	2.7909e+07	0	0.001027	37.35	0.00391164	2	1004.46	-0.408164	8.67296	0
	High	NLNNSNLFSPVNR	3	4	1	21264365		0	964749377	0	0.002758	34.71	0.0167342	2	1488.75	-0.821701	44.3822	0
	High	LPISASHSSK	1	2	1	21264365		0	0	0	0.0003747	33.18	0.0132231	1	1026.56	-0.366441	14.11	0
	High	AGVSTNISTK	3	4	1	21264365		0	3.08674e+08	0	0.001112	31.94	0.0290759	1	977.525	-1.24485	16.9281	0
	High	ALSMYEEAFQNTSDSDR	1	2	1	21264365		0	4.62251e+06	0	7.771e-07	31.2	0.0145268	2	1963.83	-2.72554	50.4777	0
	High	ADTSQEIcSPR	1	2	1	21264365	C8(Carbamidomethyl)	0	1.06546e+07	0	0.0002261	30.59	0.0180269	2	1263.56	-2.25618	17.4263	0
	High	EASGDLPEAQIVK	1	2	1	21264365		0	3.88878e+07	0	1.769e-05	30.52	0.0362403	2	1356.7	0.448274	36.5536	0
	High	AEVTLDGVWPTDK	1	4	1	21264365		0	5.75516e+07	0	1.74e-05	30.21	0.0403033	2	1430.72	2.28467	54.6047	0
	High	LSWHLWEVLR	1	1	1	21264365		0	5936430	0	1.742e-05	30.03	0.0312335	3	1338.73	0.192332	65.1485	0
	High	HQcITAMK	1	4	1	21264365	C3(Carbamidomethyl)	0	7.58185e+06	0	0.002727	27.06	0.0465405	1	988.469	-1.34668	14.0039	0
	High	GFLEDLAPPER	1	2	1	21264365		0	4.93978e+07	0	0.0002445	26.55	0.0687166	2	1243.63	0.0661259	56.367	0
	High	LADINYEGR	2	4	1	21264365		0	2.57936e+08	0	0.0008782	26.27	0.107874	1	1050.52	-1.74958	28.2616	0
	High	SLEELRLEDYQANR	1	4	1	21264365		0	1.20836e+07	0	0.001912	25.38	0.148634	2	1735.86	-0.499049	43.0582	1
	High	EYRPETGSWVFK	1	4	1	21264365		0	396346526	0	0.001254	23.57	0.171201	2	1498.73	-0.549964	44.1186	0
	High	VGYYTIPSMDDLAK	1	4	1	21264365		0	302037926	0	0.006998	14.24	1.81006	2	1572.76	2.12162	59.1915	0
	High	VVLSLHHPPDR	1	2	1	21264365		0	4.42699e+07	0	0.0007139	14.16	1.03217	3	1269.71	-0.488071	24.6006	0
	High	FNPPTGTDTMVK	2	4	1	21264365		0	8.92978e+08	0.001	0.01994	23.3	0.209545	2	1307.63	-0.395448	34.5479	0
	High	LKPTNPAAQK	2	4	1	21264365		0	5.10929e+08	0.001	0.02222	15.85	0.456328	1	1067.62	-0.430829	12.1102	0
	High	VGYYTIPSmDDLAK	1	4	1	21264365	M9(Oxidation)	0	2.52079e+07	0.001	0.01493	14.49	1.69636	2	1588.76	0.460345	46.2804	0
	High	ALTTPTHYK	2	4	1	21264365		0	4.25612e+08	0.002	0.02459	18.89	0.597189	1	1031.55	-2.40487	17.2047	0
	High	SITADPLDYR	1	1	1	21264365		0	37875913	0.004	0.05497	35.6	0.0124216	2	1150.57	0.936463	42.8042	0
	High	SLTQSYLR	1	2	1	21264365		0	4.45147e+07	0.006	0.08514	15.25	0.877702	2	967.518	-2.52625	30.833	0
	High	QLGLVPR	1	2	1	21264365		0	1.51994e+07	0.007	0.0976	21.76	0.0686811	2	782.488	-0.327918	31.6871	0
	High	LAQSDMAK	1	2	1	21264365		0	0	0.009	0.1282	11.45	2.80012	1	863.429	-0.686128	12.1656	0
372466577	keratin, type II cytoskeletal 8 isoform 2 [Homo sapiens]	522.839	39.34	15	14	17	20	2.30977e+08	483	53.6711	5.59229
	A4	Sequence	# PSMs	# Proteins	# Protein Groups	Protein Group Accessions	Modifications	ΔCn	Area	q-Value	PEP	IonScore	Exp Value	Charge	MH+ [Da]	ΔM [ppm]	RT [min]	# Missed Cleavages
	High	SNMDNMFESYINNLR	1	2	1	372466577		0	5.56743e+07	0	8.413e-08	101.36	2.23729e-09	2	1847.81	1.61368	67.2879	0
	High	ELQSQISDTSVVLSMDNSR	1	2	1	372466577		0	1.25709e+07	0	1.694e-09	92.39	3.05686e-08	2	2109.01	0.257956	54.0666	0
	High	LKLEAELGNMQGLVEDFK	1	2	1	372466577		0	1.33465e+06	0	1.544e-07	71.89	3.16129e-06	2	2034.06	2.07267	66.6411	1
	High	LALDIEIATYR	1	10	3	119395750;125628632;372466577		0	2.26303e+07	0	1.711e-05	70.33	2.47927e-06	2	1277.72	4.37693	61.3654	0
	High	LSELEAALQR	2	2	1	372466577		0	2.54771e+08	0	6.892e-05	68.61	5.97709e-06	2	1129.62	0.145349	43.4517	0
	High	LVSESSDVLPK	2	2	1	372466577		0	2.31843e+08	0	1.604e-05	66.9	8.89177e-06	2	1173.63	-1.18272	32.5551	0
	High	TEMENEFVLIK	1	2	1	372466577		0	27321532	0	7.326e-06	60.42	4.73428e-05	2	1352.68	1.15989	56.078	0
	High	AEAESMYQIK	2	2	1	372466577		0	6.7833e+07	0	0.0002477	60.37	2.97081e-05	2	1169.55	-0.768684	30.026	0
	High	SLDMDSIIAEVK	1	2	1	372466577		0	5.61759e+07	0	2.698e-05	56.66	0.000118568	2	1320.68	3.18591	62.817	0
	High	ASLEAAIADAEQR	1	2	1	372466577		0	8.48713e+07	0	8.322e-05	56	0.000113286	2	1344.68	2.17972	49.1979	0
	High	QLYEEEIR	1	2	1	372466577		0	3.77764e+07	0	0.004243	49.79	0.000452878	2	1079.53	-2.2713	30.1651	0
	High	LQAEIEGLK	1	2	1	372466577		0	110920208	0	0.002899	37.3	0.00672213	2	1000.57	0.893096	35.4812	0
	High	YEELQSLAGK	1	2	1	372466577		0	8.16942e+06	0	0.00146	36.97	0.00925187	1	1137.58	-0.0509932	34.6062	0
	High	EYQELMNVK	1	5	2	155969697;372466577		0	6246450	0	0.0006688	35.77	0.0108191	1	1153.56	-0.250788	35.8157	0
	High	AQYEDIANR	1	3	1	372466577		0	3.03345e+06	0	0.004836	34.19	0.0135088	1	1079.51	-0.615984	21.606	0
	High	WSLLQQQK	1	2	1	372466577		0	2.06317e+08	0.002	0.03028	24.1	0.179544	2	1030.57	-1.65882	41.4466	0
	High	FASFIDK	1	20	4	47132620;155969697;119395754;372466577		0	1.00715e+08	0.003	0.0396	34.99	0.00740094	2	827.43	0.338409	36.9353	0
316659409	actin, cytoplasmic 2 [Homo sapiens]	491.554	59.2	9	1	15	37	1.21428e+09	375	41.7658	5.47803
	A4	Sequence	# PSMs	# Proteins	# Protein Groups	Protein Group Accessions	Modifications	ΔCn	Area	q-Value	PEP	IonScore	Exp Value	Charge	MH+ [Da]	ΔM [ppm]	RT [min]	# Missed Cleavages
	High	eEEIAALVIDNGSGMcK	1	1	1	316659409	N-Term(Acetyl); C16(Carbamidomethyl)	0	1.40894e+07	0	4.488e-09	94.26	1.85237e-08	2	1877.86	1.39591	68.7968	0
	High	VAPEEHPVLLTEAPLNPK	3	2	2	316659409;4501885		0	1.65012e+09	0	6.759e-08	65.71	7.39812e-06	2	1954.06	-0.375115	47.4486	0
	High	SYELPDGQVITIGNER	4	10	3	316659409;4501881;4501885		0	4.17103e+08	0	2.807e-08	65.33	1.66328e-05	2	1790.89	0.217927	57.8298	0
	High	DLYANTVLSGGTTMYPGIADR	2	2	2	316659409;4501885		0	5.30983e+07	0	1.074e-07	61.33	4.37675e-05	2	2215.07	0.690498	61.5135	0
	High	TTGIVMDSGDGVTHTVPIYEGYALPHAILR	1	2	2	316659409;4501885		0	264760204	0	1.35e-09	61.33	3.44545e-05	3	3183.62	0.930846	62.4056	0
	High	HQGVMVGMGQK	1	7	3	316659409;4501881;4501885		0	2.1006e+07	0	1.757e-05	53.1	0.000144975	1	1171.57	-2.1576	19.3997	0
	High	EITALAPSTMK	2	7	3	316659409;4501881;4501885		0	862469878	0	6.496e-06	52.09	0.00032106	1	1161.62	-0.457438	36.4177	0
	High	HQGVmVGMGQK	4	7	3	316659409;4501881;4501885	M5(Oxidation)	0	4.5983e+07	0	5.706e-05	49.82	0.000300187	2	1187.56	-1.19868	15.8216	0
	High	cPEALFQPSFLGMEScGIHETTFNSIMK	1	2	2	316659409;4501885	C1(Carbamidomethyl); C16(Carbamidomethyl)	0	1.14634e+07	0	1.313e-07	43.02	0.00217514	3	3231.47	3.12233	68.1095	0
	High	QEYDESGPSIVHR	2	8	2	316659409;4501885		0	1.02535e+08	0	3.232e-05	42.42	0.00189882	2	1516.7	0.223662	25.2461	0
	High	AVFPSIVGRPR	1	12	3	316659409;4501881;4501885		0	4.06017e+08	0	0.002057	35.16	0.00633962	2	1198.7	-0.880891	40.513	0
	High	GYSFTTTAER	2	2	2	316659409;4501885		0	5.24654e+08	0	0.001926	34.12	0.0107464	1	1132.53	-0.740153	29.1231	0
	High	DLYANTVLSGGTTmYPGIADR	1	2	2	316659409;4501885	M14(Oxidation)	0	3.41824e+06	0	7.122e-06	33.71	0.0233654	2	2231.06	-2.17838	58.5875	0
	High	DLTDYLmK	2	8	3	316659409;4501881;4501885	M7(Oxidation)	0	2.46902e+07	0	0.001513	31.38	0.0150287	1	1014.48	0.356959	43.9227	0
	High	EITALAPSTmK	3	7	3	316659409;4501881;4501885	M10(Oxidation)	0	54839638	0	0.006096	20.34	0.436458	2	1177.61	0.0718564	29.6302	0
	High	IWHHTFYNELR	3	10	3	316659409;4501885;4501881		0	1.13024e+09	0	0.0004905	18.81	0.543188	2	1515.75	-0.240412	35.7443	0
	High	AGFAGDDAPR	1	13	3	316659409;4501881;4501885		0	3.28158e+06	0	0.006268	18.1	0.335319	1	976.446	-2.23699	19.44	0
	High	TTGIVmDSGDGVTHTVPIYEGYALPHAILR	1	2	2	316659409;4501885	M6(Oxidation)	0	1.83533e+07	0	0.00015	16.01	1.24804	3	3199.61	1.63796	61.5285	0
	High	DLTDYLMK	1	8	3	316659409;4501881;4501885		0	1.76904e+08	0.001	0.009834	31.94	0.0165691	2	998.486	-0.7702	53.761	0
	Medium	RGILTLK	1	11	3	316659409;4501881;4501885		0	9.30739e+07	0.014	0.1857	22.5	0.072542	2	800.534	-1.32913	27.5088	1
118572613	serine/arginine repetitive matrix protein 2 [Homo sapiens]	490.712	15.95	1	30	30	36	1.46849e+08	2752	299.438	12.0591
	A4	Sequence	# PSMs	# Proteins	# Protein Groups	Protein Group Accessions	Modifications	ΔCn	Area	q-Value	PEP	IonScore	Exp Value	Charge	MH+ [Da]	ΔM [ppm]	RT [min]	# Missed Cleavages
	High	AAFGISDSYVDGSSFDPQR	1	1	1	118572613		0	7.72342e+06	0	1.548e-07	115.34	1.01761e-10	2	2018.91	0.299304	57.1772	0
	High	NSGPLGTEMNTGFSSEVK	1	1	1	118572613		0	2.13495e+07	0	9.423e-09	73.4	2.51627e-06	2	1854.85	-0.385091	47.6091	0
	High	SSTPPGESYFGVSSLQLK	1	1	1	118572613		0	1.85044e+07	0	1.027e-07	64.33	1.87625e-05	2	1883.94	-0.818489	58.9921	0
	High	SSTGPEPPAPTPLLAER	1	1	1	118572613		0	89191510	0	3.988e-07	63.9	2.08579e-05	2	1719.89	-0.140992	44.7884	0
	High	MGQAPSQSLLPPAQDQPR	3	1	1	118572613		0	22377738	0	9.688e-08	60.7	4.61317e-05	2	1920.96	0.975631	39.3063	0
	High	IPAASAAAMNLASAR	1	1	1	118572613		0	98944711	0	1.8e-08	60.35	4.13773e-05	2	1414.75	-0.576648	44.427	0
	High	FQSDSSSYPTVDSNSLLGQSR	1	1	1	118572613		0	5.42787e+06	0	4.618e-08	58.6	6.8398e-05	2	2275.05	-0.845497	47.8269	0
	High	TPAAAAAMNLASPR	1	1	1	118572613		0	1.17974e+08	0	1.113e-06	56.67	8.35279e-05	2	1341.69	0.237347	39.3621	0
	High	TPAIPTAVNLADSR	1	1	1	118572613		0	1.30419e+08	0	1.307e-06	56.02	8.06361e-05	2	1425.77	-0.335722	46.7836	0
	High	TAVAPSAVNLADPR	1	1	1	118572613		0	90582324	0	0.0002352	45.11	0.00121478	2	1381.74	-1.96205	37.5968	0
	High	TPMSVLQQAGGSMMDGPGPR	1	1	1	118572613		0	5.10199e+07	0	1.616e-07	40.95	0.0032824	3	2016.93	1.01727	59.5451	0
	High	SPGMLEPLGSSR	1	1	1	118572613		0	80507204	0	4.298e-05	36.84	0.00838407	2	1230.61	-1.07295	38.8066	0
	High	RPNPDILDHER	1	1	1	118572613		0	1.63382e+07	0	2.088e-06	35.65	0.0137088	3	1361.69	-1.1577	21.4074	0
	High	SAHATAPVNIAGSR	1	1	1	118572613		0	6.6499e+07	0	0.000173	33.99	0.0164997	2	1351.71	-1.12964	21.3907	0
	High	IPAASAAAmNLASAR	2	1	1	118572613	M9(Oxidation)	0	4.12082e+06	0	0.000106	33.98	0.0175176	2	1430.74	-2.98848	38.6138	0
	High	TPQAPASANLVGPR	1	1	1	118572613		0	148840735	0	0.0002366	33.24	0.0188511	2	1378.74	-0.169305	31.4929	0
	High	QGSITSPQANEQSVTPQR	1	1	1	118572613		0	4.03182e+06	0	1.193e-05	30.68	0.0469859	2	1927.94	-1.23224	26.4231	0
	High	MSQVPAPVPLMSLR	1	1	1	118572613		0	6.44216e+07	0	0.001799	27.56	0.064192	2	1525.82	0.58253	61.0738	0
	High	TAPAANLASR	1	1	1	118572613		0	1.29262e+07	0	0.003847	23.69	0.116725	1	971.526	-1.07293	17.5408	0
	High	EETPGQRPAVTETHQLAELNEK	1	1	1	118572613		0	0	0	2.271e-05	23.42	0.265941	3	2477.22	-1.42966	33.2721	0
	High	AGMSSNQSISSPVLDAVPR	1	1	1	118572613		0	10610693	0	0.0008854	22.58	0.316616	2	1915.95	-1.86336	51.9255	0
	High	TPTAPAVNLAGAR	2	1	1	118572613		0	1.61287e+08	0	0.0006414	21.73	0.177257	2	1238.68	-0.593742	34.8178	0
	High	TAAALAPASLTSAR	1	1	1	118572613		0	1.12862e+08	0	0.00344	19.89	0.368722	2	1300.72	-0.969137	37.4632	0
	High	SSGHSSSELSPDAVEK	1	1	1	118572613		0	0	0	0.008385	14.69	1.15303	2	1616.74	-0.519583	20.4134	0
	High	AQTPPGPSLSGSK	1	1	1	118572613		0	2.53619e+07	0.001	0.02214	23.06	0.187097	2	1226.64	-1.67585	21.2729	0
	High	QSHSGSISPYPK	1	1	1	118572613		0	2.24486e+07	0.001	0.01109	20.8	0.324388	2	1287.63	-1.3919	16.8859	0
	High	mSQVPAPVPLMSLR	1	1	1	118572613	M1(Oxidation)	0	1.61755e+07	0.001	0.01598	15.66	1.02546	2	1541.82	1.42018	59.4995	0
	High	QSHSESPSLQSK	1	1	1	118572613		0	2.16066e+06	0.003	0.04856	23.14	0.148013	2	1314.63	-0.561493	11.0388	0
	High	GEFSASPMLK	1	1	1	118572613		0	5.42137e+06	0.003	0.04573	14.09	1.77424	1	1066.52	-1.16105	38.2019	0
	High	ELSNSPLR	1	1	1	118572613		0	31764841	0.007	0.0964	10.9	2.80833	1	915.493	3.37788	34.1356	0
	High	TPPSAPSQSR	1	1	1	118572613		0	3.32516e+06	0.008	0.1145	17.36	0.494947	2	1027.52	-0.921281	10.6276	0
	Medium	ALPQTPRPR	1	1	1	118572613		0	1.97308e+07	0.034	0.4567	12.69	1.03617	2	1035.6	-1.84614	18.5758	0
14165466	polypyrimidine tract-binding protein 1 isoform c [Homo sapiens]	488.357	30.32	10	11	11	23	2.40504e+08	531	57.1856	9.17334
	A4	Sequence	# PSMs	# Proteins	# Protein Groups	Protein Group Accessions	Modifications	ΔCn	Area	q-Value	PEP	IonScore	Exp Value	Charge	MH+ [Da]	ΔM [ppm]	RT [min]	# Missed Cleavages
	High	KLPIDVTEGEVISLGLPFGK	1	3	1	14165466		0	3.46246e+07	0	1.758e-10	121.4	8.8019e-12	2	2112.2	1.5778	68.384	1
	High	IAIPGLAGAGNSVLLVSNLNPER	2	3	1	14165466		0	2.26898e+08	0	2.813e-10	89.3	1.50387e-08	2	2275.29	4.25766	68.3146	0
	High	LSLDGQNIYNAccTLR	3	3	1	14165466	C12(Carbamidomethyl); C13(Carbamidomethyl)	0	1.62509e+08	0	2.536e-07	86.95	8.98173e-08	2	1897.89	-2.05048	52.1635	0
	High	NNQFQALLQYADPVSAQHAK	1	3	1	14165466		0	1.1e+07	0	3.593e-08	85.87	1.41058e-07	2	2243.12	0.751903	62.9842	0
	High	VLFSSNGGVVK	3	3	1	14165466		0	2.63766e+08	0	0.0006343	52.64	0.000155183	1	1106.62	-0.227749	36.4524	0
	High	VTNLLMLK	1	9	1	14165466		0	1.42141e+08	0	0.0007575	41.46	0.00155403	2	931.563	-1.36467	49.606	0
	High	HQNVQLPR	3	3	1	14165466		0	1.68082e+08	0	0.008248	39.64	0.00406866	2	991.542	-1.25315	18.2117	0
	High	VTNLLmLK	2	9	1	14165466	M6(Oxidation)	0	5.38769e+07	0	0.0001305	35.45	0.00655734	2	947.56	0.353241	44.9803	0
	High	NFQNIFPPSATLHLSNIPPSVSEEDLK	4	3	1	14165466		0	8.89508e+07	0	0.0001768	21.27	0.341127	3	2994.52	0.447021	64.4182	0
	High	GQPIYIQFSNHK	1	3	1	14165466		0	230848841	0.001	0.01468	19.52	0.642755	2	1431.74	0.000934398	39.0642	0
	Medium	LTSLNVK	1	9	1	14165466		0	99177739	0.029	0.4006	14.31	1.43268	2	774.47	-2.33694	22.4581	0
	Medium	DYGNSPLHR	1	3	1	14165466		0	3.31603e+06	0.035	0.4581	13.92	0.912394	1	1058.5	-1.10264	17.9726	0
74027249	E3 ubiquitin-protein ligase TRIM33 isoform alpha [Homo sapiens]	472.679	25.2	1	1	25	32	1.42883e+08	1127	122.456	6.66846
	A4	Sequence	# PSMs	# Proteins	# Protein Groups	Protein Group Accessions	Modifications	ΔCn	Area	q-Value	PEP	IonScore	Exp Value	Charge	MH+ [Da]	ΔM [ppm]	RT [min]	# Missed Cleavages
	High	QLSVPIPGGSNGDIQQVGVIR	1	2	2	74027249;74027251		0	1.26752e+07	0	4.022e-10	76.87	5.45839e-07	2	2134.16	-0.311612	59.3336	0
	High	VVQVYADTQEINLK	1	1	1	74027249		0	3.08618e+07	0	1.634e-08	74.74	1.65854e-06	2	1619.86	-1.07483	46.4201	0
	High	SLLQQLENVTK	1	2	2	74027249;74027251		0	1.1567e+08	0	0.0001867	62.35	1.95005e-05	2	1272.72	1.84326	62.2717	0
	High	VAIFTLINEINKK	2	2	2	74027249;74027251		0	1.4754e+06	0	2.112e-05	59.26	8.95255e-06	2	1502.9	2.14597	64.7164	1
	High	TAQGLSPVDQR	1	2	2	74027249;74027251		0	64458874	0	0.0005618	59.14	4.38227e-05	2	1171.61	-0.534881	20.5936	0
	High	LTEIYSDR	2	2	2	74027249;74027251		0	3.76087e+07	0	0.001036	55.3	0.000103735	2	996.499	-0.30616	25.0142	0
	High	NYVHFAATQVQNR	1	2	2	74027249;74027251		0	2.89653e+07	0	1.083e-06	54.97	0.00016526	2	1547.77	-0.54006	32.9245	0
	High	QEPGTEDEIcSFSGGVK	1	2	2	74027249;74027251	C10(Carbamidomethyl)	0	1.87395e+07	0	5.75e-07	54.55	0.00013048	2	1839.8	-2.22169	41.5449	0
	High	TPGQINLAQLR	2	2	2	74027249;74027251		0	2.02678e+08	0	2.878e-06	50.07	0.000168266	2	1210.69	0.649495	44.9334	0
	High	GAIENLLAK	1	2	2	74027249;74027251		0	5.65177e+07	0	0.0002843	49.06	0.000405399	2	928.546	-0.20806	43.993	0
	High	GNMNcGAFQAHQMR	1	2	2	74027249;74027251	C5(Carbamidomethyl)	0	1.82451e+07	0	1.287e-05	48.86	0.00022818	2	1621.68	-0.148769	25.0211	0
	High	LLPcLHSFcLR	1	2	2	74027249;74027251	C4(Carbamidomethyl); C9(Carbamidomethyl)	0	3.17789e+07	0	0.0001074	48.14	0.000618451	2	1415.73	0.866477	56.6053	0
	High	LQHMQQQVYAQK	1	2	2	74027249;74027251		0	39409980	0	1.938e-05	46.9	0.000932053	2	1501.76	-0.371173	19.2612	0
	High	AVALYFEDK	2	2	2	74027249;74027251		0	3.29285e+07	0	0.001212	38.22	0.00412057	2	1055.54	0.451014	43.3259	0
	High	LQHmQQQVYAQK	1	2	2	74027249;74027251	M4(Oxidation)	0	3.92881e+06	0	0.0001199	37.79	0.00762675	2	1517.75	-0.314475	13.4498	0
	High	KPMDLSTVK	2	2	2	74027249;74027251		0	110299200	0	0.001874	33.38	0.0229369	2	1018.56	-0.452912	20.5915	0
	High	VKQEPGTEDEIcSFSGGVK	1	2	2	74027249;74027251	C12(Carbamidomethyl)	0	6.22103e+06	0	1.847e-06	26.72	0.109067	2	2066.97	-0.471009	37.0396	1
	High	HSQHYQIPDDFVADVR	1	2	2	74027249;74027251		0	41425935	0	1.996e-06	25.54	0.121615	3	1926.91	-1.94536	46.1345	0
	High	KNYVHFAATQVQNR	2	2	2	74027249;74027251		0	1.09891e+07	0	0.0003186	24.32	0.194715	3	1675.86	-1.19837	27.8275	1
	High	RLITFQLR	1	2	2	74027249;74027251		0	1.56834e+07	0	0.004662	20.8	0.0644617	2	1046.65	-1.23616	44.4737	1
	High	VFHLTcHVPTLLSFPSGDWIcTFcR	1	2	2	74027249;74027251	C6(Carbamidomethyl); C21(Carbamidomethyl); C24(Carbamidomethyl)	0	2.49819e+07	0	0.0003107	17.7	0.900069	4	3050.45	0.769233	69.8012	0
	High	cDPVPAANGAIR	1	2	2	74027249;74027251	C1(Carbamidomethyl)	0	29292194	0	0.0005271	17.48	0.625271	2	1240.61	-1.63737	28.7267	0
	High	QIDLVDNYFVK	1	2	2	74027249;74027251		0	51123480	0	0.001001	15.24	1.24777	2	1353.71	0.857635	59.6073	0
	High	DIGKPEVEYDcDNLQHSK	1	2	2	74027249;74027251	C11(Carbamidomethyl)	0	4.0637e+07	0	2.803e-06	13.85	1.61542	3	2146.96	-2.87727	30.6923	0
	Medium	LFcETcDR	1	2	2	74027249;74027251	C3(Carbamidomethyl); C6(Carbamidomethyl)	0	3.40786e+07	0.013	0.1752	27.71	0.0196543	2	1100.45	-2.65366	22.4901	0
	Medium	LITFQLR	1	2	2	74027249;74027251		0	2.62282e+07	0.014	0.1902	31.36	0.00924891	2	890.544	-2.36095	51.3595	0
302699211	pogo transposable element with ZNF domain isoform 3 [Homo sapiens]	465.478	30.8	5	28	28	35	1.05581e+08	1315	145.203	7.18115
	A4	Sequence	# PSMs	# Proteins	# Protein Groups	Protein Group Accessions	Modifications	ΔCn	Area	q-Value	PEP	IonScore	Exp Value	Charge	MH+ [Da]	ΔM [ppm]	RT [min]	# Missed Cleavages
	High	LAcTScTFVTSVGDAMAK	1	5	1	302699211	C3(Carbamidomethyl); C6(Carbamidomethyl)	0	0	0	8.154e-08	111.42	1.97583e-10	2	1918.84	-15.4871	55.2994	0
	High	TAPVASTPSSTPIPALSPPTK	2	5	1	302699211		0	6.64612e+07	0	3.665e-07	83.09	1.64454e-07	2	2020.09	-1.3058	48.5461	0
	High	GQMDQPANMPDSILLEAK	1	5	1	302699211		0	1.35487e+07	0	6.682e-08	73.97	1.84198e-06	2	1957.94	0.34717	58.7904	0
	High	VPEPNENVGDAVQTK	1	5	1	302699211		0	70631592	0	8.688e-08	71.37	3.68741e-06	2	1596.78	-1.09954	29.099	0
	High	ISDVIEDSVVEDYNSVDK	1	5	1	302699211		0	5.61174e+06	0	9.418e-09	64.61	1.60862e-05	2	2025.95	-0.227454	57.6423	0
	High	GHMcYccPEMVEYQK	1	5	1	302699211	C4(Carbamidomethyl); C6(Carbamidomethyl); C7(Carbamidomethyl)	0	8.85248e+06	0	1.011e-05	53.44	2.96648e-05	2	1991.76	0.600189	36.1791	0
	High	IcEWAFESEPLFLQHMK	2	5	1	302699211	C2(Carbamidomethyl)	0	6.63505e+07	0	2e-07	48.11	0.000827484	2	2165.02	2.27081	65.8795	0
	High	FQASQGENLEGK	1	5	1	302699211		0	2.20135e+07	0	0.0001737	45.72	0.0011574	2	1307.62	-3.13809	22.3295	0
	High	LVNTLNTIPSLGQSPGPVVVSNNSSAHGSQR	1	5	1	302699211		0	3.49324e+07	0	6.171e-06	35.11	0.0102824	3	3130.63	1.99733	54.585	0
	High	RPGVTGENSNEVAK	1	5	1	302699211		0	3.31501e+07	0	0.0001017	33.56	0.0183271	2	1457.73	-0.969687	13.0445	0
	High	DTHKPGEMPYVcQVcQYR	1	5	1	302699211	C12(Carbamidomethyl); C15(Carbamidomethyl)	0	3.14749e+07	0	5.475e-07	33.17	0.0151573	3	2268	-0.450188	39.1341	0
	High	THLSEEVLAMLSASSTLPAVVPAGcSSK	1	5	1	302699211	C25(Carbamidomethyl)	0	2.94509e+07	0	9.238e-07	33.16	0.0250224	3	2842.43	0.238326	69.2087	0
	High	EQQLPVNEETLFQK	1	5	1	302699211		0	44028522	0	3.114e-05	31.01	0.0391496	2	1702.86	-0.0233006	51.7548	0
	High	GMLVMDcHR	1	5	1	302699211	C7(Carbamidomethyl)	0	28810428	0	0.004266	29.63	0.0170418	2	1118.49	-0.137083	26.7153	0
	High	NGNAFQQHYMR	1	5	1	302699211		0	1.84295e+07	0	0.001046	28.96	0.0347502	2	1365.61	-0.342445	25.13	0
	High	VAQLTNFPK	2	5	1	302699211		0	1.05513e+08	0	0.007254	28.88	0.0524796	1	1017.57	0.493264	35.3832	0
	High	LAEWVLTQR	2	5	1	302699211		0	1.19202e+08	0	0.001851	28.13	0.058373	2	1115.62	-1.46383	47.7183	0
	High	LQFLFAK	1	5	1	302699211		0	2.99999e+07	0	0.004957	24.17	0.049193	2	866.514	0.545074	56.2266	0
	High	AYANHMINNHVPR	1	5	1	302699211		0	6.24143e+07	0	0.001761	21.6	0.308903	3	1536.75	0.346511	22.0611	0
	High	AVAHTLPK	1	5	1	302699211		0	1.01511e+07	0	0.007878	20.24	0.134839	2	836.498	-1.62122	13.4362	0
	High	HHVELDQQNGEVDGHTIcQHcYR	1	5	1	302699211	C18(Carbamidomethyl); C21(Carbamidomethyl)	0	7204530	0	1.313e-05	14.34	1.10623	4	2832.23	-1.73625	26.4773	0
	High	LAPSFPSPPAVSIASFVTVK	1	3	1	302699211		0	3.19908e+06	0	0.005546	9.96	1.94786	3	2015.13	2.25113	69.503	0
	High	QLEGLKPGTK	1	5	1	302699211		0	4.16571e+07	0.002	0.0314	23.98	0.0855882	2	1070.62	-2.01525	17.2708	0
	High	IQPLDVcIK	2	5	1	302699211	C7(Carbamidomethyl)	0	3.95898e+07	0.002	0.03057	18.88	0.458145	1	1085.6	0.919548	44.9449	0
	High	YLSFEAEEK	2	5	1	302699211		0	2.04475e+07	0.002	0.02321	12.64	1.33675	1	1115.53	1.26061	36.0998	0
	High	NmYPPPSFPTNK	1	5	1	302699211	M2(Oxidation)	0	0	0.003	0.04994	11.64	2.58429	2	1408.65	-1.87274	34.6354	0
	High	NMYPPPSFPTNK	1	5	1	302699211		0	9.20266e+07	0.005	0.07234	17.32	0.758094	2	1392.66	-1.3382	40.3873	0
	High	ISYEWAVR	1	5	1	302699211		0	5.247e+06	0.005	0.06835	16.74	0.993511	1	1023.53	-0.738468	44.7558	0
	Medium	HLVFNPSHR	1	5	1	302699211		0	0	0.021	0.2846	16.5	1.14734	1	1106.58	-2.0707	19.4902	0
222352151	poly(rC)-binding protein 1 [Homo sapiens]	458.8	75.84	3	11	16	38	1.91437e+09	356	37.4739	7.09326
	A4	Sequence	# PSMs	# Proteins	# Protein Groups	Protein Group Accessions	Modifications	ΔCn	Area	q-Value	PEP	IonScore	Exp Value	Charge	MH+ [Da]	ΔM [ppm]	RT [min]	# Missed Cleavages
	High	QVTITGSAASISLAQYLINAR	3	1	1	222352151		0	1.01176e+08	0	1.723e-10	114.51	8.79683e-11	2	2177.19	-0.163068	68.6593	0
	High	ESTGAQVQVAGDMLPNSTER	4	10	2	193083110;222352151		0	1.37967e+08	0	1.201e-08	70.94	4.06716e-06	2	2089.98	0.700836	42.7945	0
	High	AITIAGVPQSVTEcVK	3	1	1	222352151	C14(Carbamidomethyl)	0	1.28181e+09	0	3.523e-05	41.71	0.00322424	2	1672.89	0.542586	52.8238	0
	High	mDAGVTESGLNVTLTIR	2	1	1	222352151	N-Term(Acetyl)	0	1.68113e+07	0	1.428e-05	40.8	0.00444162	2	1818.93	2.95126	66.5337	0
	High	VmTIPYQPMPASSPVIcAGGQDR	5	1	1	222352151	M2(Oxidation); C17(Carbamidomethyl)	0	4.65334e+07	0	7.632e-06	39.85	0.00561565	3	2491.18	0.200553	51.7716	0
	High	cSDAAGYPHATHDLEGPPLDAYSIQGQHTISPLDLAK	1	1	1	222352151	C1(Carbamidomethyl)	0	4.70232e+07	0	1.531e-08	39.69	0.0058962	4	3945.87	0.0936441	58.9354	0
	High	INISEGNcPER	2	10	2	193083110;222352151	C8(Carbamidomethyl)	0	7.24211e+08	0	0.001202	37.64	0.00430467	2	1288.59	-1.66243	23.3919	0
	High	IITLTGPTNAIFK	8	1	1	222352151		0	1507459198	0	0.002645	37.23	0.00349137	2	1388.82	1.33689	74.272	0
	High	AFAMIIDK	1	8	2	193083110;222352151		0	9.76958e+07	0	0.003684	36.75	0.00698508	2	908.491	-0.253178	45.3126	0
	High	LVVPATQcGSLIGK	1	1	1	222352151	C8(Carbamidomethyl)	0	2.95383e+09	0	0.0001852	31.93	0.0230515	2	1442.8	0.339233	44.893	0
	High	IANPVEGSSGR	1	1	1	222352151		0	697525226	0	0.003901	30.63	0.0318741	2	1086.55	-1.22725	19.9223	0
	High	QQSHFAMMHGGTGFAGIDSSSPEVK	1	1	1	222352151		0	8.55144e+07	0	2.886e-07	28.11	0.0615011	3	2606.18	-0.0689465	44.5178	0
	High	VMTIPYQPMPASSPVIcAGGQDR	1	1	1	222352151	C17(Carbamidomethyl)	0	2.71622e+08	0	1.981e-06	26.09	0.135443	3	2475.18	0.391411	58.3517	0
	High	GYWASLDASTQTTHELTIPNNLIGcIIGR	1	1	1	222352151	C25(Carbamidomethyl)	0	1.32077e+07	0	6.294e-06	17.64	0.769675	3	3201.61	2.51061	70.4324	0
	High	QQSHFAMmHGGTGFAGIDSSSPEVK	1	1	1	222352151	M8(Oxidation)	0	0	0	6.941e-05	17.15	0.683308	3	2622.17	0.520665	39.9552	0
	High	EVGSIIGK	1	12	2	193083110;222352151		0	103727503	0.008	0.1028	17.53	1.07022	2	802.467	-0.424899	24.5842	0
	Medium	QmSGAQIK	1	10	2	193083110;222352151	M2(Oxidation)	0	420956	0.046	0.5765	20.55	0.318499	2	878.44	-0.099375	7.97016	0
	Medium	QGANINEIR	1	1	1	222352151		0	2.23229e+08	0.049	0.6015	15.9	0.763408	2	1014.53	-2.91719	22.3252	0
5032087	splicing factor 3A subunit 1 isoform 1 [Homo sapiens]	444.422	32.91	2	21	21	32	1.47017e+08	793	88.8305	5.22412
	A4	Sequence	# PSMs	# Proteins	# Protein Groups	Protein Group Accessions	Modifications	ΔCn	Area	q-Value	PEP	IonScore	Exp Value	Charge	MH+ [Da]	ΔM [ppm]	RT [min]	# Missed Cleavages
	High	VMQQQQQTTQQQLPQK	2	1	1	5032087		0	7.22749e+07	0	4.141e-06	73.89	1.89052e-06	2	1941.98	-0.641254	20.222	0
	High	DSNSLAYYNMANGAVIHLALK	1	2	1	5032087		0	5.64855e+06	0	2e-07	69.36	6.8252e-06	2	2265.13	0.0163699	64.2118	0
	High	RTDIFGVEETAIGK	1	2	1	5032087		0	3.52081e+07	0	1.438e-05	62.45	2.85849e-05	2	1535.8	-1.77286	47.7341	1
	High	TDIFGVEETAIGK	1	2	1	5032087		0	4.17068e+07	0	7.381e-07	61.47	4.07396e-05	2	1379.71	0.094683	56.2101	0
	High	ASKPLPPAPAPDEYLVSPITGEK	3	2	1	5032087		0	1.29098e+08	0	1.954e-09	58.62	5.00151e-05	3	2377.27	1.37696	54.3034	0
	High	FNFLNPNDPYHAYYR	2	2	1	5032087		0	2.01961e+08	0	5.075e-07	58.24	6.69609e-05	2	1930.89	2.20816	56.8736	0
	High	VmQQQQQTTQQQLPQK	1	1	1	5032087	M2(Oxidation)	0	4.66336e+06	0	2.312e-06	56.81	0.000104016	2	1957.97	-2.27842	17.4746	0
	High	TQQAAQANITLQEQIEAIHK	1	2	1	5032087		0	2.67186e+06	0	6.972e-08	55.01	0.000121152	2	2235.17	-0.970577	48.4905	0
	High	PAGPVQAVPPPPPVPTEPK	1	2	1	5032087		0	1.09991e+08	0	3.18e-06	46.02	0.00057883	2	1875.04	-0.351175	43.9321	0
	High	VTWDGHSGSMAR	1	2	1	5032087		0	85731343	0	4.056e-05	45.82	0.000594328	2	1303.58	-1.94718	23.2716	0
	High	IHEATGMPAGK	2	2	1	5032087		0	9.78545e+07	0	0.0001564	41.87	0.00230146	1	1111.56	-0.441738	14.3824	0
	High	EVLDQVcYR	1	2	1	5032087	C7(Carbamidomethyl)	0	2.19285e+06	0	0.0001891	39.13	0.0046184	1	1181.56	-0.38242	33.844	0
	High	LQYEGIFIK	2	2	1	5032087		0	1.03222e+08	0	0.004762	34.69	0.00857554	2	1110.62	0.678437	54.0382	0
	High	LTAQFVAR	2	1	1	5032087		0	9.02892e+07	0	0.0006691	33.73	0.0122433	2	905.519	-1.21215	29.6715	0
	High	EDSAPSKPVVGIIYPPPEVR	2	2	1	5032087		0	6.12535e+07	0	0.0003412	31.78	0.0223681	2	2150.14	-2.99117	51.8535	0
	High	IGEEEIQKPEEK	1	2	1	5032087		0	3.57007e+07	0	0.000378	30.94	0.0322554	2	1428.72	-1.37685	20.2008	0
	High	QFLTQLMQK	2	2	1	5032087		0	9.21715e+07	0	0.002407	29.04	0.0465898	1	1136.61	1.27994	52.9103	0
	High	TEDSLMPEEEFLR	1	2	1	5032087		0	3.18968e+07	0	0.0004271	22.9	0.177963	2	1595.73	1.92898	59.1723	0
	High	VQVPNMQDKTEWK	1	2	1	5032087		0	6.14551e+06	0.001	0.01066	21.21	0.355333	2	1602.79	-1.78297	36.8975	1
	High	VQVPNMQDK	1	2	1	5032087		0	4.96077e+07	0.003	0.0507	10.44	2.98204	2	1058.53	-1.044	26.5782	0
	Medium	AQEPSAAIPK	1	1	1	5032087		0	6406919	0.012	0.161	14.01	1.07043	1	1011.54	-2.10614	22.5312	0
	Medium	IGLLDPR	2	2	1	5032087		0	9.80169e+07	0.021	0.2821	38.54	0.0016865	2	783.471	-2.2115	38.402	0
74027251	E3 ubiquitin-protein ligase TRIM33 isoform beta [Homo sapiens]	438.56	25.5	1	1	25	32	1.42883e+08	1110	120.465	6.66846
	A4	Sequence	# PSMs	# Proteins	# Protein Groups	Protein Group Accessions	Modifications	ΔCn	Area	q-Value	PEP	IonScore	Exp Value	Charge	MH+ [Da]	ΔM [ppm]	RT [min]	# Missed Cleavages
	High	QLSVPIPGGSNGDIQQVGVIR	1	2	2	74027249;74027251		0	1.26752e+07	0	4.022e-10	76.87	5.45839e-07	2	2134.16	-0.311612	59.3336	0
	High	SLLQQLENVTK	1	2	2	74027249;74027251		0	1.1567e+08	0	0.0001867	62.35	1.95005e-05	2	1272.72	1.84326	62.2717	0
	High	VAIFTLINEINKK	2	2	2	74027249;74027251		0	1.4754e+06	0	2.112e-05	59.26	8.95255e-06	2	1502.9	2.14597	64.7164	1
	High	TAQGLSPVDQR	1	2	2	74027249;74027251		0	64458874	0	0.0005618	59.14	4.38227e-05	2	1171.61	-0.534881	20.5936	0
	High	LTEIYSDR	2	2	2	74027249;74027251		0	3.76087e+07	0	0.001036	55.3	0.000103735	2	996.499	-0.30616	25.0142	0
	High	NYVHFAATQVQNR	1	2	2	74027249;74027251		0	2.89653e+07	0	1.083e-06	54.97	0.00016526	2	1547.77	-0.54006	32.9245	0
	High	QEPGTEDEIcSFSGGVK	1	2	2	74027249;74027251	C10(Carbamidomethyl)	0	1.87395e+07	0	5.75e-07	54.55	0.00013048	2	1839.8	-2.22169	41.5449	0
	High	TPGQINLAQLR	2	2	2	74027249;74027251		0	2.02678e+08	0	2.878e-06	50.07	0.000168266	2	1210.69	0.649495	44.9334	0
	High	GAIENLLAK	1	2	2	74027249;74027251		0	5.65177e+07	0	0.0002843	49.06	0.000405399	2	928.546	-0.20806	43.993	0
	High	GNMNcGAFQAHQMR	1	2	2	74027249;74027251	C5(Carbamidomethyl)	0	1.82451e+07	0	1.287e-05	48.86	0.00022818	2	1621.68	-0.148769	25.0211	0
	High	LLPcLHSFcLR	1	2	2	74027249;74027251	C4(Carbamidomethyl); C9(Carbamidomethyl)	0	3.17789e+07	0	0.0001074	48.14	0.000618451	2	1415.73	0.866477	56.6053	0
	High	LQHMQQQVYAQK	1	2	2	74027249;74027251		0	39409980	0	1.938e-05	46.9	0.000932053	2	1501.76	-0.371173	19.2612	0
	High	FNEADSEVAQAGK	1	1	1	74027251		0	1.90402e+07	0	1.392e-05	39.21	0.00421624	2	1365.62	-2.9131	23.0669	0
	High	AVALYFEDK	2	2	2	74027249;74027251		0	3.29285e+07	0	0.001212	38.22	0.00412057	2	1055.54	0.451014	43.3259	0
	High	LQHmQQQVYAQK	1	2	2	74027249;74027251	M4(Oxidation)	0	3.92881e+06	0	0.0001199	37.79	0.00762675	2	1517.75	-0.314475	13.4498	0
	High	KPMDLSTVK	2	2	2	74027249;74027251		0	110299200	0	0.001874	33.38	0.0229369	2	1018.56	-0.452912	20.5915	0
	High	VKQEPGTEDEIcSFSGGVK	1	2	2	74027249;74027251	C12(Carbamidomethyl)	0	6.22103e+06	0	1.847e-06	26.72	0.109067	2	2066.97	-0.471009	37.0396	1
	High	HSQHYQIPDDFVADVR	1	2	2	74027249;74027251		0	41425935	0	1.996e-06	25.54	0.121615	3	1926.91	-1.94536	46.1345	0
	High	KNYVHFAATQVQNR	2	2	2	74027249;74027251		0	1.09891e+07	0	0.0003186	24.32	0.194715	3	1675.86	-1.19837	27.8275	1
	High	RLITFQLR	1	2	2	74027249;74027251		0	1.56834e+07	0	0.004662	20.8	0.0644617	2	1046.65	-1.23616	44.4737	1
	High	VFHLTcHVPTLLSFPSGDWIcTFcR	1	2	2	74027249;74027251	C6(Carbamidomethyl); C21(Carbamidomethyl); C24(Carbamidomethyl)	0	2.49819e+07	0	0.0003107	17.7	0.900069	4	3050.45	0.769233	69.8012	0
	High	cDPVPAANGAIR	1	2	2	74027249;74027251	C1(Carbamidomethyl)	0	29292194	0	0.0005271	17.48	0.625271	2	1240.61	-1.63737	28.7267	0
	High	QIDLVDNYFVK	1	2	2	74027249;74027251		0	51123480	0	0.001001	15.24	1.24777	2	1353.71	0.857635	59.6073	0
	High	DIGKPEVEYDcDNLQHSK	1	2	2	74027249;74027251	C11(Carbamidomethyl)	0	4.0637e+07	0	2.803e-06	13.85	1.61542	3	2146.96	-2.87727	30.6923	0
	Medium	LFcETcDR	1	2	2	74027249;74027251	C3(Carbamidomethyl); C6(Carbamidomethyl)	0	3.40786e+07	0.013	0.1752	27.71	0.0196543	2	1100.45	-2.65366	22.4901	0
	Medium	LITFQLR	1	2	2	74027249;74027251		0	2.62282e+07	0.014	0.1902	31.36	0.00924891	2	890.544	-2.36095	51.3595	0
146219843	helicase SRCAP [Homo sapiens]	435.772	10.8	1	27	28	31	3.90052e+07	3230	343.343	5.96045
	A4	Sequence	# PSMs	# Proteins	# Protein Groups	Protein Group Accessions	Modifications	ΔCn	Area	q-Value	PEP	IonScore	Exp Value	Charge	MH+ [Da]	ΔM [ppm]	RT [min]	# Missed Cleavages
	High	LPQEEEEGPGAGDESScGTGGGTHR	1	1	1	146219843	C17(Carbamidomethyl)	0	8.17185e+06	0	1.737e-11	78.28	2.20661e-07	3	2514.04	-0.705691	20.2434	0
	High	QAAFQEQLASELWPR	1	1	1	146219843		0	1.71946e+07	0	2.526e-07	75.55	1.36799e-06	2	1773.9	1.96857	64.7802	0
	High	YSDLLSQSLNQPLTSSK	1	1	1	146219843		0	1.57492e+07	0	7.732e-09	68.41	6.72747e-06	2	1880.96	-0.347225	53.9189	0
	High	LQTLAVLLR	1	1	1	146219843		0	1.98337e+07	0	0.0001439	54.81	2.13088e-05	2	1026.67	1.18752	59.9013	0
	High	SPGPSHPTFWTYTEAAHR	2	1	1	146219843		0	2.15136e+07	0	1.468e-07	53.13	0.000199184	2	2041.95	-1.36303	41.4289	0
	High	VLIFTQMTR	1	1	1	146219843		0	2.78894e+07	0	8.765e-05	52.43	0.000150013	2	1108.62	1.71885	52.983	0
	High	YLILDEAQNIK	1	1	1	146219843		0	3.34348e+07	0	5.933e-05	45.92	0.00102471	2	1319.72	1.13827	53.0088	0
	High	FDLIGLEGR	1	1	1	146219843		0	1.84156e+07	0	7.237e-05	44.85	0.00143048	2	1019.55	0.507643	56.749	0
	High	LDQLSEIIER	1	1	1	146219843		0	4.58405e+07	0	5.75e-05	44.57	0.00167587	2	1215.66	-0.598145	51.0939	0
	High	SPFYLDSLEEK	1	1	1	146219843		0	3.77402e+07	0	0.0001313	40.67	0.00351814	2	1327.64	0.902776	54.0499	0
	High	GAASTLVPGVSETSASPGSPSVR	1	1	1	146219843		0	1.0026e+07	0	1.226e-06	37.75	0.00868781	2	2114.08	1.86952	42.7234	0
	High	AETQGANHTPVISAHQTR	1	1	1	146219843		0	5.31466e+06	0	1.006e-05	36.69	0.0111537	3	1917.95	-1.50688	16.5086	0
	High	YEADTFLPR	1	1	1	146219843		0	2.55728e+07	0	0.0001438	34.55	0.01282	2	1111.54	0.133586	43.4866	0
	High	LPVSKDEPDTLTLR	1	1	1	146219843		0	9.94249e+06	0	0.003708	33.75	0.0155184	2	1583.86	-0.187036	38.0504	1
	High	AEQEIAALVEQLTPIER	1	1	1	146219843		0	6.22661e+06	0	9.525e-05	32.42	0.0182722	3	1910.02	0.422279	69.0637	0
	High	MLGDMAIEGGNFTTAYFK	1	1	1	146219843		0	6.19775e+06	0	9.603e-05	30.22	0.0392124	2	1965.91	1.4982	64.8943	0
	High	VLRPFLLR	1	9	3	48255898;192807320;146219843		0	3.24423e+07	0	0.007945	26.06	0.0204387	2	1013.66	0.733928	46.5139	0
	High	GYTLATTQVK	2	1	1	146219843		0	1.331e+07	0	0.002883	23.04	0.148978	1	1081.59	0.371776	29.1255	0
	High	LILSPDMQAR	1	1	1	146219843		0	2.20458e+06	0	0.002077	16.58	0.950574	2	1143.62	-1.64933	41.3173	0
	High	EGELPLEELLR	1	1	1	146219843		0	1.34918e+07	0	0.0004312	16.18	0.708512	2	1297.7	2.34812	67.4535	0
	High	LIQYDcGK	2	1	1	146219843	C6(Carbamidomethyl)	0	1.24002e+07	0	0.006315	15.31	1.05263	2	996.481	-0.740169	21.101	0
	High	AGAPVGGSPGLAK	1	1	1	146219843		0	2.78318e+07	0	0.005107	14.51	0.870833	2	1081.6	-1.77438	21.393	0
	High	GQGTGRPGQPPGPK	1	1	1	146219843		0	3.78459e+06	0.001	0.008653	43.27	0.00258331	2	1333.7	-0.373719	10.8564	0
	High	WQSLLNFNSQR	1	1	1	146219843		0	2.55371e+06	0.003	0.04854	16.72	1.01193	2	1392.68	-14.0022	57.0396	0
	High	TPIPLLLR	1	1	1	146219843		0	2.39356e+07	0.005	0.06672	21.05	0.0188457	2	922.609	0.645005	58.1106	0
	High	AVLFPQQR	1	1	1	146219843		0	3.27437e+07	0.007	0.1002	15.98	1.2302	2	958.546	-0.890091	33.1157	0
	High	TVEENILK	1	1	1	146219843		0	3194551	0.009	0.1214	17.42	1.00892	1	945.525	-0.295017	29.8285	0
	Medium	MLQPVPK	1	1	1	146219843		0	9.26938e+06	0.036	0.4705	15.33	0.404463	2	812.468	-2.50992	22.9052	0
40807477	retinoic acid-induced protein 1 [Homo sapiens]	435.199	23.98	1	30	30	35	1.24876e+08	1906	203.225	8.79248
	A4	Sequence	# PSMs	# Proteins	# Protein Groups	Protein Group Accessions	Modifications	ΔCn	Area	q-Value	PEP	IonScore	Exp Value	Charge	MH+ [Da]	ΔM [ppm]	RT [min]	# Missed Cleavages
	High	GAGGSPVGVEEGLVNVGTGQK	1	1	1	40807477		0	3.07884e+07	0	1.363e-10	87.67	8.62703e-08	2	1911.98	-0.671359	47.6361	0
	High	AASSPSNPAALPVASDSSPMGSK	1	1	1	40807477		0	1.03888e+07	0	4.209e-06	68.73	7.56917e-06	2	2129.02	-0.195196	39.5049	0
	High	APGASPGNPLSPSLSDKDR	2	1	1	40807477		0	2.79651e+07	0	2.529e-06	62.57	3.05449e-05	2	1865.93	-0.617208	31.9777	1
	High	APGASPGNPLSPSLSDK	1	1	1	40807477		0	1.01983e+08	0	5.262e-08	61.33	3.92398e-05	2	1594.81	-0.863784	36.2796	0
	High	RPYLGPALLLTPR	1	1	1	40807477		0	9.80292e+07	0	5.303e-05	59.48	6.98862e-06	2	1466.88	-0.289484	57.6793	0
	High	QQQVLPLDPAEPEIR	1	1	1	40807477		0	2.73821e+07	0	2.202e-05	54.09	0.000180933	2	1732.92	-0.147889	52.6514	0
	High	TPGPPGLTTTPAPPDK	1	1	1	40807477		0	1.60844e+08	0	4.817e-07	53	0.000224031	2	1546.81	-0.885208	35.2167	0
	High	EEAGGLLQcPEVAK	1	1	1	40807477	C9(Carbamidomethyl)	0	2.53292e+07	0	0.0001826	52.55	0.000251269	2	1500.73	-1.04382	39.6159	0
	High	QYAEQGAQVPFR	1	1	1	40807477		0	1.54845e+07	0	5.415e-05	46.82	0.000995135	2	1393.68	-1.29991	34.8429	0
	High	SAFMAPVPTK	2	1	1	40807477		0	23389256	0	0.0002634	46.08	0.00125275	1	1048.55	-1.24119	36.3108	0
	High	LFGLQEAMK	2	1	1	40807477		0	30787720	0	0.0003602	41.65	0.00289979	2	1036.55	-0.738582	51.6261	0
	High	APGDSTTSDASLAQKPNKPAVPEAPIAK	1	1	1	40807477		0	2.42878e+07	0	2.193e-07	35.9	0.0102045	3	2761.44	-0.467622	33.9209	0
	High	DLGDLcGPYYPEHcLPK	2	1	1	40807477	C6(Carbamidomethyl); C14(Carbamidomethyl)	0	3.33116e+07	0	9.801e-07	34.81	0.01077	2	2033.91	1.00269	52.0373	0
	High	TEAFTSPEALQPGGTALAPK	1	1	1	40807477		0	56323209	0	1.434e-07	31.75	0.0349544	2	1986.02	-0.962978	50.2759	0
	High	DAFTTIcTVVNSPGDAPKPHR	1	1	1	40807477	C7(Carbamidomethyl)	0	1.35417e+07	0	7.74e-06	29.61	0.064434	3	2283.11	-3.42089	50.4263	0
	High	ALSTScLVccLcQNPANFK	1	1	1	40807477	C6(Carbamidomethyl); C9(Carbamidomethyl); C10(Carbamidomethyl); C12(Carbamidomethyl)	0	2.25347e+06	0	1.531e-05	27.55	0.0781397	2	2243.01	1.17441	59.6924	0
	High	LQScYccDGR	1	1	1	40807477	C4(Carbamidomethyl); C6(Carbamidomethyl); C7(Carbamidomethyl)	0	6945814	0	0.005867	24.05	0.021842	2	1318.49	-2.02261	17.419	0
	High	VQNLHAYQSGR	1	1	1	40807477		0	2.4218e+07	0	0.0005114	23.68	0.17849	2	1272.64	-2.7302	15.6982	0
	High	VRPEGTcEEASLPLER	1	1	1	40807477	C7(Carbamidomethyl)	0	41340436	0	7.496e-06	23.56	0.211466	3	1842.9	-1.56305	34.2878	0
	High	YAGEESLQAWGAPQPPPPQPQPLPAGVAK	1	1	1	40807477		0	7.73051e+06	0	0.000139	22.86	0.245863	3	2981.52	0.282869	57.4733	0
	High	SFLYcNQAR	1	1	1	40807477	C5(Carbamidomethyl)	0	4.92894e+07	0	0.005984	20.89	0.225673	2	1158.53	-2.13059	31.098	0
	High	DSSKPPFSLENHSAcLDSVAK	1	1	1	40807477	C15(Carbamidomethyl)	0	2.06045e+07	0	3.003e-06	20.65	0.4249	3	2289.08	0.139387	42.792	0
	High	QQNYQQTSQETSR	1	1	1	40807477		0	0	0	0.004056	20.38	0.304185	2	1597.72	-0.529142	12.2266	0
	High	ScTAPTAQPHDRPLTASSSLAPGQR	1	1	1	40807477	C2(Carbamidomethyl)	0	5.85883e+06	0	0.0005013	19.61	0.624102	3	2606.27	-1.52347	27.5627	0
	High	AWAEAPSLVK	2	1	1	40807477		0	4.37536e+07	0	0.001927	19.15	0.458502	1	1071.58	-0.804193	42.2046	0
	High	SAWPRPGEPEALPDSLQLDK	1	1	1	40807477		0	1.69278e+07	0	0.000684	14.34	2.10202	3	2206.11	0.0809543	55.945	0
	High	SLTALSEPR	1	1	1	40807477		0	2.97909e+07	0.001	0.01906	31.24	0.0355893	2	973.53	-1.16312	29.3671	0
	High	LSSTDcFK	1	1	1	40807477	C6(Carbamidomethyl)	0	0	0.002	0.03263	11.9	1.23643	1	957.433	-1.48078	19.9719	0
	High	WGLHPGELTK	1	1	1	40807477		0	0	0.005	0.06314	16.9	0.721754	1	1137.6	-2.09923	37.3008	0
	Medium	TPAFSPFVR	1	1	1	40807477		0	1.118e+08	0.01	0.142	12.21	2.47383	2	1021.55	-0.0939236	47.8507	0
301069416	nuclear pore glycoprotein p62 [Homo sapiens]	423.457	25.86	1	9	9	15	4.38428e+08	522	53.2225	5.31299
	A4	Sequence	# PSMs	# Proteins	# Protein Groups	Protein Group Accessions	Modifications	ΔCn	Area	q-Value	PEP	IonScore	Exp Value	Charge	MH+ [Da]	ΔM [ppm]	RT [min]	# Missed Cleavages
	High	sGFNFGGTGAPTGGFTFGTAK	1	1	1	301069416	N-Term(Acetyl)	0	2.16232e+08	0	1.086e-08	73.44	2.12183e-06	2	2020.94	2.4531	65.3874	0
	High	ILNAHMDSLQWIDQNSALLQR	3	1	1	301069416		0	4.2646e+08	0	1.601e-08	72.59	2.6604e-06	2	2466.26	0.295223	63.2592	0
	High	EQSGTIYLQHADEER	1	1	1	301069416		0	5.12601e+07	0	1.062e-05	72.58	2.31596e-06	2	1775.82	-0.776243	28.604	0
	High	LAENIDAQLK	2	1	1	301069416		0	501088093	0	5.039e-05	65.42	1.06219e-05	1	1114.61	-0.410914	33.5031	0
	High	HFLQQATQVNAWDR	2	1	1	301069416		0	3.87737e+08	0	1.094e-07	64.92	1.54128e-05	2	1713.85	0.847332	42.648	0
	High	MAQDLKDIIEHLNTSGAPADTSDPLQQIcK	1	1	1	301069416	C29(Carbamidomethyl)	0	1.38425e+07	0	1.244e-08	62.63	3.06716e-05	3	3309.61	0.95253	64.3641	1
	High	WSLELEDQER	1	1	1	301069416		0	2.54055e+08	0	0.001395	54.67	0.000126583	2	1304.61	-1.05943	48.5279	0
	High	RLDQELDFILSQQK	2	1	1	301069416		0	1.38711e+08	0	5.705e-05	54.09	0.000183858	2	1732.92	0.703184	61.4692	1
	High	DIIEHLNTSGAPADTSDPLQQIcK	1	1	1	301069416	C23(Carbamidomethyl)	0	1.61019e+08	0	2.808e-09	37.13	0.0102921	3	2623.27	1.09567	55.5292	0
	High	ILNAHmDSLQWIDQNSALLQR	1	1	1	301069416	M6(Oxidation)	0	1.47574e+07	0	7.85e-07	36.51	0.0124075	3	2482.25	0.344768	60.9586	0
4504035	GMP synthase [glutamine-hydrolyzing] [Homo sapiens]	420.903	44.16	1	23	23	33	2.04154e+08	693	76.667	6.87354
	A4	Sequence	# PSMs	# Proteins	# Protein Groups	Protein Group Accessions	Modifications	ΔCn	Area	q-Value	PEP	IonScore	Exp Value	Charge	MH+ [Da]	ΔM [ppm]	RT [min]	# Missed Cleavages
	High	LMQITSLHSLNAFLLPIK	1	1	1	4504035		0	16939799	0	6.781e-09	79.18	1.12327e-07	2	2039.18	3.42075	69.7896	0
	High	EPPTDVTPTFLTTGVLSTLR	1	1	1	4504035		0	3.29541e+07	0	3.808e-08	74.69	1.30246e-06	2	2145.15	1.24032	69.4707	0
	High	EDGVFNISVDNTcSLFR	1	1	1	4504035	C13(Carbamidomethyl)	0	1.23769e+07	0	2.859e-06	53.44	0.000208559	2	1972.91	0.445643	65.0197	0
	High	VVYIFGPPVK	2	1	1	4504035		0	1.8308e+08	0	2.816e-05	51.31	0.000127582	1	1118.66	0.870633	55.5344	0
	High	SGNIVAGIANESK	1	1	1	4504035		0	2838540	0	4.32e-06	50.19	0.000449881	1	1259.66	0.57059	34.7892	0
	High	LYGAQFHPEVGLTENGK	1	1	1	4504035		0	2.63854e+07	0	6.09e-08	47.39	0.00091742	2	1859.93	-1.02471	44.3943	0
	High	IMYDLTSKPPGTTEWE	1	1	1	4504035		0	9.60311e+07	0	3.635e-06	46.76	0.000996327	2	1867.88	0.0118836	54.9877	0
	High	DGHHHYEGAVVILDAGAQYGK	1	1	1	4504035		0	8.19658e+06	0	4.153e-06	45.3	0.00176777	3	2237.07	-0.582723	42.2731	0
	High	SYSYVcGISSK	1	1	1	4504035	C6(Carbamidomethyl)	0	94042538	0	0.0002019	44.89	0.00108816	2	1250.57	-1.16666	32.5738	0
	High	VIEPLKDFHKDEVR	1	1	1	4504035		0	4.49743e+06	0	0.000196	41.08	0.00250715	2	1724.93	-0.0291622	33.0476	2
	High	ImYDLTSKPPGTTEWE	4	1	1	4504035	M2(Oxidation)	0	5.81567e+06	0	0.0002316	39.82	0.00509172	2	1883.88	2.06303	52.5314	0
	High	ISQMPVILTPLHFDR	1	1	1	4504035		0	8.37065e+07	0	1.595e-06	39.19	0.00398867	3	1766.96	0.715255	63.2366	0
	High	HPFPGPGLAIR	3	1	1	4504035		0	3.3335e+08	0	0.00114	38.8	0.00417228	3	1161.65	-2.80767	40.3263	0
	High	ISQMPVILTPLHFDRDPLQK	2	1	1	4504035		0	7.96704e+07	0	0.001077	34.9	0.00710288	2	2348.29	3.00534	62.8813	1
	High	LmQITSLHSLNAFLLPIK	1	1	1	4504035	M2(Oxidation)	0	0	0	2.953e-05	29.73	0.0145788	3	2055.17	1.31799	67.3201	0
	High	KLYGAQFHPEVGLTENGK	1	1	1	4504035		0	3.37831e+06	0	0.001398	19.46	0.484667	2	1988.03	1.9276	39.1366	1
	High	IVADFSASVK	2	1	1	4504035		0	1.97509e+07	0	0.003066	17.59	0.601794	1	1036.57	1.28722	36.0948	0
	High	IANEVIGEMNLKPEEVFLAQGTLRPDLIESASLVASGK	1	1	1	4504035		0	2.37154e+07	0	6.975e-06	16.53	0.433545	4	4039.15	1.08831	70.4397	0
	High	TLNMTTSPEEK	1	1	1	4504035		0	6.32137e+07	0	0.006058	15.2	1.18382	2	1250.59	-1.59533	24.0588	0
	High	ELGLPEELVSR	1	1	1	4504035		0	0	0.001	0.01759	27.95	0.0467346	1	1241.67	0.625918	55.091	0
	High	DFPETNNILK	1	1	1	4504035		0	79816534	0.001	0.01482	18.29	0.747189	2	1190.61	-0.0681689	45.595	0
	High	QADFEAHNILR	1	1	1	4504035		0	25978228	0.001	0.01803	11.02	3.34457	3	1313.66	-0.115136	34.6973	0
	High	TVGVQGDcR	1	1	1	4504035	C8(Carbamidomethyl)	0	5.37088e+06	0.006	0.07864	31.32	0.0198496	2	991.463	0.705154	12.2714	0
	High	LENAGGDLK	1	1	1	4504035		0	836776	0.007	0.09486	19.64	0.420447	1	916.472	-1.44393	15.3649	0
	Medium	VFGGTVHK	1	1	1	4504035		0	0	0.015	0.1981	12.06	2.68211	2	844.468	0.621589	13.7077	0
4501885	actin, cytoplasmic 1 [Homo sapiens]	419.409	59.2	9	1	15	38	1.21428e+09	375	41.7097	5.47803
	A4	Sequence	# PSMs	# Proteins	# Protein Groups	Protein Group Accessions	Modifications	ΔCn	Area	q-Value	PEP	IonScore	Exp Value	Charge	MH+ [Da]	ΔM [ppm]	RT [min]	# Missed Cleavages
	High	VAPEEHPVLLTEAPLNPK	3	2	2	316659409;4501885		0	1.65012e+09	0	6.759e-08	65.71	7.39812e-06	2	1954.06	-0.375115	47.4486	0
	High	SYELPDGQVITIGNER	4	10	3	316659409;4501881;4501885		0	4.17103e+08	0	2.807e-08	65.33	1.66328e-05	2	1790.89	0.217927	57.8298	0
	High	DLYANTVLSGGTTMYPGIADR	2	2	2	316659409;4501885		0	5.30983e+07	0	1.074e-07	61.33	4.37675e-05	2	2215.07	0.690498	61.5135	0
	High	TTGIVMDSGDGVTHTVPIYEGYALPHAILR	1	2	2	316659409;4501885		0	264760204	0	1.35e-09	61.33	3.44545e-05	3	3183.62	0.930846	62.4056	0
	High	HQGVMVGMGQK	1	7	3	316659409;4501881;4501885		0	2.1006e+07	0	1.757e-05	53.1	0.000144975	1	1171.57	-2.1576	19.3997	0
	High	EITALAPSTMK	2	7	3	316659409;4501881;4501885		0	862469878	0	6.496e-06	52.09	0.00032106	1	1161.62	-0.457438	36.4177	0
	High	HQGVmVGMGQK	4	7	3	316659409;4501881;4501885	M5(Oxidation)	0	4.5983e+07	0	5.706e-05	49.82	0.000300187	2	1187.56	-1.19868	15.8216	0
	High	cPEALFQPSFLGMEScGIHETTFNSIMK	1	2	2	316659409;4501885	C1(Carbamidomethyl); C16(Carbamidomethyl)	0	1.14634e+07	0	1.313e-07	43.02	0.00217514	3	3231.47	3.12233	68.1095	0
	High	QEYDESGPSIVHR	2	8	2	316659409;4501885		0	1.02535e+08	0	3.232e-05	42.42	0.00189882	2	1516.7	0.223662	25.2461	0
	High	AVFPSIVGRPR	1	12	3	316659409;4501881;4501885		0	4.06017e+08	0	0.002057	35.16	0.00633962	2	1198.7	-0.880891	40.513	0
	High	GYSFTTTAER	2	2	2	316659409;4501885		0	5.24654e+08	0	0.001926	34.12	0.0107464	1	1132.53	-0.740153	29.1231	0
	High	DLYANTVLSGGTTmYPGIADR	1	2	2	316659409;4501885	M14(Oxidation)	0	3.41824e+06	0	7.122e-06	33.71	0.0233654	2	2231.06	-2.17838	58.5875	0
	High	DLTDYLmK	2	8	3	316659409;4501881;4501885	M7(Oxidation)	0	2.46902e+07	0	0.001513	31.38	0.0150287	1	1014.48	0.356959	43.9227	0
	High	EITALAPSTmK	3	7	3	316659409;4501881;4501885	M10(Oxidation)	0	54839638	0	0.006096	20.34	0.436458	2	1177.61	0.0718564	29.6302	0
	High	IWHHTFYNELR	3	10	3	316659409;4501885;4501881		0	1.13024e+09	0	0.0004905	18.81	0.543188	2	1515.75	-0.240412	35.7443	0
	High	AGFAGDDAPR	1	13	3	316659409;4501881;4501885		0	3.28158e+06	0	0.006268	18.1	0.335319	1	976.446	-2.23699	19.44	0
	High	TTGIVmDSGDGVTHTVPIYEGYALPHAILR	1	2	2	316659409;4501885	M6(Oxidation)	0	1.83533e+07	0	0.00015	16.01	1.24804	3	3199.61	1.63796	61.5285	0
	High	dDDIAALVVDNGSGmcK	2	1	1	4501885	N-Term(Acetyl); M15(Oxidation); C16(Carbamidomethyl)	0	4.76098e+06	0	7.91e-06	12.76	1.35329	2	1837.79	0.0630606	61.5429	0
	High	DLTDYLMK	1	8	3	316659409;4501881;4501885		0	1.76904e+08	0.001	0.009834	31.94	0.0165691	2	998.486	-0.7702	53.761	0
	Medium	RGILTLK	1	11	3	316659409;4501881;4501885		0	9.30739e+07	0.014	0.1857	22.5	0.072542	2	800.534	-1.32913	27.5088	1
114155142	nucleoprotein TPR [Homo sapiens]	416.114	12.48	1	22	22	22	5.04023e+07	2363	267.131	5.021
	A4	Sequence	# PSMs	# Proteins	# Protein Groups	Protein Group Accessions	Modifications	ΔCn	Area	q-Value	PEP	IonScore	Exp Value	Charge	MH+ [Da]	ΔM [ppm]	RT [min]	# Missed Cleavages
	High	SNASLTNNQNLIQSLK	1	1	1	114155142		0	2.77675e+07	0	1.662e-07	76.74	9.86097e-07	2	1744.91	-2.65293	48.267	0
	High	LESALTELEQLR	1	1	1	114155142		0	2.30177e+07	0	4.096e-06	73.57	1.89662e-06	2	1401.76	0.710331	62.551	0
	High	TLSSVQNEVQEALQR	1	1	1	114155142		0	16160857	0	3.956e-06	64.87	1.69598e-05	2	1701.88	0.767379	58.115	0
	High	LEQDLQQMQAK	1	1	1	114155142		0	2.03036e+07	0	2.05e-05	62.9	1.92323e-05	2	1331.66	-1.40519	26.6398	0
	High	ASTALSNEQQAR	1	1	1	114155142		0	0	0	4.528e-05	59.11	4.64586e-05	2	1275.63	-1.5229	13.9947	0
	High	ILLSQTTGVAIPLHASSLDDVSLASTPK	1	1	1	114155142		0	3.22101e+07	0	6.334e-08	59.1	1.91922e-05	3	2834.55	0.290252	63.2316	0
	High	aAVLQQVLER	1	1	1	114155142	N-Term(Acetyl)	0	1.26565e+07	0	0.0001018	55.39	4.35047e-05	2	1168.67	3.13214	70.5674	0
	High	FEVAQVESLR	1	1	1	114155142		0	36297777	0	2.205e-05	54.57	0.000164794	2	1177.62	1.07235	46.516	0
	High	LDELQASDVSVK	1	1	1	114155142		0	2.64497e+07	0	5.95e-06	49.28	0.000618488	2	1303.67	-0.228314	35.3878	0
	High	NIEELQQQNQR	1	1	1	114155142		0	1.45263e+07	0	0.000102	48.88	0.000514443	2	1399.69	0.66134	22.0635	0
	High	EGVQGPLNVSLSEEGK	1	1	1	114155142		0	3.12889e+07	0	4.185e-06	40.64	0.00415956	2	1642.83	-0.474215	45.3385	0
	High	ELLHSQNTWLNTELK	1	1	1	114155142		0	9.15347e+06	0	4.993e-07	40.29	0.00447124	2	1825.94	-0.116052	51.9305	0
	High	LLHDQIEK	1	1	1	114155142		0	2.93438e+07	0	0.00173	31.74	0.017551	2	995.551	-1.36058	16.8838	0
	High	QLQEIFENYK	1	1	1	114155142		0	1.65467e+07	0	0.003647	31.54	0.0277776	2	1311.66	0.7638	48.6766	0
	High	QHQMQLVDSIVR	1	1	1	114155142		0	21773517	0	0.0002324	29.47	0.0493721	2	1453.76	0.526471	42.6574	0
	High	TMAQHEELMK	1	1	1	114155142		0	1.19965e+07	0	0.00173	26.39	0.061996	2	1217.56	-1.91811	19.1447	0
	High	GAILSEEELAAMSPTAAAVAK	1	1	1	114155142		0	7.41972e+06	0	1.123e-05	22.69	0.262945	2	2030.05	0.286694	61.0985	0
	High	FHNELNAHIK	1	1	1	114155142		0	0	0	0.004968	14.38	1.92043	2	1222.63	-1.82438	21.1266	0
	High	FLADQQSEIDGLK	1	1	1	114155142		0	31724080	0	0.003589	12.17	3.07312	2	1463.74	-0.752482	43.8939	0
	High	LEHEISHLK	1	1	1	114155142		0	0	0.001	0.02197	16.33	1.01388	2	1105.6	-1.47886	15.2937	0
	High	RPSTSQTVSTPAPVPVIESTEAIEAK	1	1	1	114155142		0	0	0.001	0.01168	14.96	1.51279	3	2695.38	-12.5599	51.9583	0
	High	AVASLSVK	1	1	1	114155142		0	8.2699e+07	0.001	0.01115	10.43	3.50066	1	774.47	-2.25368	22.2502	0
155030216	sister chromatid cohesion protein PDS5 homolog A isoform 1 [Homo sapiens]	402.58	18.77	3	19	19	22	5.11731e+07	1337	150.734	7.91357
	A4	Sequence	# PSMs	# Proteins	# Protein Groups	Protein Group Accessions	Modifications	ΔCn	Area	q-Value	PEP	IonScore	Exp Value	Charge	MH+ [Da]	ΔM [ppm]	RT [min]	# Missed Cleavages
	High	LYTVcDVALcVINSK	1	1	1	155030216	C5(Carbamidomethyl); C10(Carbamidomethyl)	0	0	0	2.125e-08	98.68	6.90469e-09	2	1754.88	0.289693	65.8068	0
	High	EINSDQATQGNISSDR	1	1	1	155030216		0	8.30268e+06	0	1.673e-08	76.27	9.3711e-07	2	1734.79	-0.277586	20.6476	0
	High	VLSFTHPTSFHSAETYESLLQcLR	1	1	1	155030216	C22(Carbamidomethyl)	0	1.51878e+07	0	3.245e-09	62.78	3.311e-05	3	2823.38	1.83186	63.9134	0
	High	DLALVNDQLLGFVR	1	2	1	155030216		0	2.41126e+07	0	6.849e-07	56.29	7.42484e-05	2	1572.87	0.192106	68.7035	0
	High	EVQLAQIFEPLSR	1	1	1	155030216		0	3.27901e+07	0	1.769e-05	53.65	0.000169803	2	1529.84	2.09533	66.6235	0
	High	AAVGQESPGGLEAGNAK	1	1	1	155030216		0	2.84217e+07	0	0.0001301	51.92	0.000302385	2	1555.77	-1.1805	24.0632	0
	High	FASHcLMNHPDLAK	1	3	1	155030216	C5(Carbamidomethyl)	0	1.18445e+07	0	2.534e-06	51.8	0.000242144	2	1640.77	-0.896308	29.5167	0
	High	TVTAAGAENIQQK	1	1	1	155030216		0	24854513	0	1.427e-05	48.93	0.000602589	2	1330.69	-2.81875	19.5276	0
	High	SGLELLK	1	1	1	155030216		0	7.26859e+06	0	0.003541	48.23	0.00079892	2	759.461	-0.661538	39.1032	0
	High	VAEAAIQIFR	2	1	1	155030216		0	3.65882e+07	0	5.566e-05	45.56	0.000977069	2	1117.64	-0.946395	50.8405	0
	High	SIEGTADDEEEGVSPDTAIR	1	1	1	155030216		0	4.71732e+06	0	2.93e-06	44.4	0.0012145	2	2090.94	-0.378284	38.0879	0
	High	SQLELLISPTcScK	1	2	1	155030216	C11(Carbamidomethyl); C13(Carbamidomethyl)	0	1.93317e+07	0	4.064e-05	37.58	0.00928777	2	1635.81	0.393762	54.0744	0
	High	FNDIHVPVR	1	2	1	155030216		0	5.10886e+07	0	0.0007782	32.56	0.0167497	2	1096.59	-1.85589	33.2396	0
	High	IFAQYLVPHNLETEER	1	2	1	155030216		0	1.93263e+07	0	1.45e-05	22.84	0.261298	2	1959	1.49377	56.4845	0
	High	VDESGPPAPSKPR	1	1	1	155030216		0	1.04695e+07	0	0.0009073	21.22	0.389628	2	1336.69	-0.210197	14.2948	0
	High	STLIPILHQK	3	1	1	155030216		0	6.58424e+07	0	0.004993	19.69	0.0687353	1	1149.7	0.561661	42.4849	0
	High	QPTNPFLEMVK	1	1	1	155030216		0	20057609	0.001	0.0195	14.05	2.11533	2	1303.67	-0.464276	60.6992	0
	High	DPVLPMK	1	1	1	155030216		0	3.66086e+06	0.009	0.1286	18.62	0.268625	2	799.437	-1.31202	31.306	0
	Medium	IAYPPGVK	1	2	1	155030216		0	2.73405e+07	0.045	0.5588	23.92	0.170314	2	844.492	-0.683531	27.2726	0
256222415	filamin-B isoform 4 [Homo sapiens]	400.112	13.42	6	26	27	28	3.54122e+07	2578	275.496	5.78271
	A4	Sequence	# PSMs	# Proteins	# Protein Groups	Protein Group Accessions	Modifications	ΔCn	Area	q-Value	PEP	IonScore	Exp Value	Charge	MH+ [Da]	ΔM [ppm]	RT [min]	# Missed Cleavages
	High	YGGPNHIVGSPFK	1	4	1	256222415		0	3.81223e+07	0	1.087e-06	72.4	2.4226e-06	2	1372.7	-1.07298	34.96	0
	High	IPYLPITNFNQNWQDGK	1	4	1	256222415		0	13102740	0	3.302e-08	65.4	1.71888e-05	2	2048.03	1.10116	65.2751	0
	High	LIALLEVLSQK	1	8	2	116063573;256222415		0	2.0873e+07	0	7.35e-06	63.83	3.105e-06	2	1226.77	1.48189	70.0109	0
	High	VVASGPGLEHGK	1	4	1	256222415		0	1.62408e+07	0	0.0003233	61.63	2.47001e-05	2	1150.62	-1.53198	15.1497	0
	High	APLNVQFNSPLPGDAVK	1	4	1	256222415		0	3.5187e+07	0	1.411e-05	56.5	8.66385e-05	2	1766.95	2.00337	57.0566	0
	High	MDGTYAcSYTPVK	1	4	1	256222415	C7(Carbamidomethyl)	0	1.71468e+07	0	9.661e-07	54.75	7.01753e-05	2	1492.64	-0.588803	33.3875	0
	High	VAVTEGcQPSR	1	4	1	256222415	C7(Carbamidomethyl)	0	2.09171e+07	0	6.916e-06	51.49	0.000271413	2	1203.58	-1.86252	15.7004	0
	High	AGPGTLSVTIEGPSK	1	4	1	256222415		0	2.44763e+07	0	6.642e-05	50.58	0.000348681	2	1413.75	-2.84291	40.7401	0
	High	VNQPASFAIR	1	4	1	256222415		0	3.29275e+07	0	0.0002538	49.36	0.000662821	2	1102.6	-0.693204	34.8223	0
	High	LPNNHIGISFIPR	1	4	1	256222415		0	7.61456e+06	0	2.758e-06	41.44	0.00189498	2	1477.83	0.474547	51.8128	0
	High	IEYNDQNDGScDVK	1	4	1	256222415	C11(Carbamidomethyl)	0	2.25032e+06	0	2.8e-05	39.02	0.00168547	2	1656.68	-0.85622	20.0974	0
	High	VSYFPTVPGVYIVSTK	1	4	1	256222415		0	26490726	0	2.647e-05	37.66	0.00606741	2	1756.96	1.74986	64.714	0
	High	VMYTPMAPGNYLISVK	1	4	1	256222415		0	1.78824e+07	0	0.0006094	37.06	0.00896372	2	1783.91	0.591008	62.5608	0
	High	FADEHVPGSPFTVK	2	4	1	256222415		0	2.54132e+07	0	1.209e-05	35.79	0.0120085	2	1530.76	0.906827	42.4389	0
	High	AGLAPLEVR	1	4	1	256222415		0	17500366	0	0.002074	33.1	0.00712628	2	925.545	-1.30148	38.8136	0
	High	TFEMSDFIVDTR	1	4	1	256222415		0	6.50432e+06	0	2.779e-06	31.73	0.0228622	2	1460.67	1.31915	62.3417	0
	High	EAFTNKPNVFTVVTR	1	4	1	256222415		0	0	0	7.222e-06	31.43	0.0298212	2	1722.92	-0.859094	47.6336	0
	High	VTEAEIVPMGK	1	4	1	256222415		0	1.63713e+07	0	0.0001574	27.84	0.0732568	2	1173.62	-0.108697	36.7219	0
	High	EAGAGGLSIAVEGPSK	1	6	1	256222415		0	1.02572e+07	0	7.162e-06	22.94	0.203772	2	1442.75	-1.05589	39.3853	0
	High	cLATGPGIASTVK	1	4	1	256222415	C1(Carbamidomethyl)	0	2.6812e+07	0	0.001742	19.08	0.685333	2	1274.68	-0.151943	33.9256	0
	High	GQHVTGSPFQFTVGPLGEGGAHK	1	4	1	256222415		0	2.69849e+07	0	0.0004327	13.02	2.70395	3	2308.15	1.63754	52.4431	0
	High	RLPNNHIGISFIPR	1	4	1	256222415		0	7.64793e+06	0	0.007982	10.81	1.46054	2	1633.93	0.177062	45.9032	1
	High	KVVPcLVTPVTGR	1	4	1	256222415	C5(Carbamidomethyl)	0	5.98442e+06	0.001	0.01483	33.21	0.00940733	2	1425.82	-3.04751	37.9369	1
	High	EVGEHLVSIK	1	4	1	256222415		0	0	0.001	0.01975	26.07	0.0653771	2	1110.61	-1.64622	29.4063	0
	High	VLPTYDASK	1	4	1	256222415		0	2.20154e+06	0.001	0.0175	16.5	0.939144	1	993.524	-1.06933	24.4074	0
	High	VFGPGIEGK	1	4	1	256222415		0	1.35025e+07	0.007	0.09331	19.84	0.555078	2	903.493	-0.793459	29.1737	0
	Medium	AWGPGLHGGIVGR	1	4	1	256222415		0	1.91736e+07	0.01	0.137	13.89	1.80681	2	1276.69	-1.16753	39.0026	0
19913408	DNA topoisomerase 2-beta [Homo sapiens]	400.005	15.92	2	22	22	24	6.35337e+07	1621	182.548	8.06006
	A4	Sequence	# PSMs	# Proteins	# Protein Groups	Protein Group Accessions	Modifications	ΔCn	Area	q-Value	PEP	IonScore	Exp Value	Charge	MH+ [Da]	ΔM [ppm]	RT [min]	# Missed Cleavages
	High	HVDYVVDQVVGK	1	1	1	19913408		0	2.90316e+07	0	7.004e-07	79.09	5.5798e-07	2	1357.71	0.0116881	35.8945	0
	High	IFDEILVNAADNK	1	2	1	19913408		0	4.29903e+07	0	8.315e-05	69.44	5.75639e-06	2	1461.76	1.67644	56.1277	0
	High	QIMENAEINNIIK	1	2	1	19913408		0	1.63485e+07	0	5.617e-07	67.46	8.66856e-06	2	1529.8	0.852012	52.7464	0
	High	SLAVSGLGVIGR	2	1	1	19913408		0	3.78561e+07	0	3.147e-06	62.21	1.35565e-05	2	1128.67	-0.513938	51.6169	0
	High	DLIQMLVQR	1	1	1	19913408		0	2.45671e+07	0	0.0001014	59.98	4.4404e-05	2	1115.63	0.868006	65.0007	0
	High	IMIMTDQDQDGSHIK	1	2	1	19913408		0	0	0	2.649e-07	56.84	7.50426e-05	2	1731.8	-1.47825	33.411	0
	High	SQDFGNLFSFPSYSQK	1	1	1	19913408		0	9674947	0	2.02e-06	49.05	0.000577455	2	1851.86	1.54024	64.7948	0
	High	VSIDPESNIISIWNNGK	1	1	1	19913408		0	18127462	0	5.116e-07	47.43	0.000835818	2	1885.97	3.23648	65.5327	0
	High	NTVEITELPVR	1	1	1	19913408		0	3.77513e+07	0	0.0001038	42.89	0.00179401	2	1270.7	1.08946	46.2597	0
	High	AGVSVKPFQVK	1	1	1	19913408		0	36266105	0	0.0003304	40.41	0.00180618	2	1159.68	-0.450445	32.6922	0
	High	FTVETAcK	1	1	1	19913408	C7(Carbamidomethyl)	0	2.92559e+06	0	0.001005	39.43	0.00303877	1	955.456	0.892247	22.0982	0
	High	RLHGLPEQFLYGTATK	1	1	1	19913408		0	1.16839e+07	0	1.979e-06	36.96	0.00793407	2	1830.99	-0.149568	46.8616	1
	High	EWLTNFMEDR	1	2	1	19913408		0	10220986	0	0.0002915	35.23	0.0085926	2	1340.6	1.37364	63.054	0
	High	AYDLAGScR	1	1	1	19913408	C8(Carbamidomethyl)	0	1.6929e+07	0	0.001954	32.56	0.0130614	2	1012.45	-1.61538	21.2636	0
	High	YAGPEDDAAITLAFSK	1	1	1	19913408		0	1.09755e+08	0	9.888e-06	32.08	0.0294544	2	1668.81	-1.71253	58.2257	0
	High	MLDGLDPHPMLPNYK	2	1	1	19913408		0	2.18285e+07	0	0.0001285	29.61	0.0581438	2	1740.85	0.0901872	53.9139	0
	High	EVTFVPGLYK	1	2	1	19913408		0	3.86861e+06	0	0.0001458	25.11	0.101437	1	1152.63	0.655904	52.6274	0
	High	YGVFPLR	1	2	1	19913408		0	3.30803e+07	0.001	0.01551	28.24	0.0361424	2	851.476	-1.68126	47.0939	0
	High	LQLEETMPSPYGR	1	1	1	19913408		0	29549079	0.001	0.01126	16.28	1.13396	2	1520.74	-2.11379	47.4988	0
	High	LSYYGLR	1	1	1	19913408		0	1.39256e+07	0.001	0.01496	16.22	0.513379	2	871.467	-0.385317	36.4296	0
	Medium	KVLFTcFK	1	2	1	19913408	C6(Carbamidomethyl)	0	2.46249e+07	0.01	0.136	21.33	0.274605	2	1042.57	-1.83332	37.6156	1
	Medium	HLTYNDFINK	1	1	1	19913408		0	0	0.013	0.1747	17.96	0.7254	2	1264.63	-1.41913	37.7309	0
188497758	ubiquitin-associated protein 2-like isoform a [Homo sapiens]	398.56	24.29	1	1	16	20	1.64936e+08	1087	114.465	7.10791
	A4	Sequence	# PSMs	# Proteins	# Protein Groups	Protein Group Accessions	Modifications	ΔCn	Area	q-Value	PEP	IonScore	Exp Value	Charge	MH+ [Da]	ΔM [ppm]	RT [min]	# Missed Cleavages
	High	AINVLLEGNPDTHSWEMVGK	2	2	2	188497756;188497758		0	76991787	0	3.482e-08	72.83	2.85875e-06	2	2210.09	0.76003	59.5777	0
	High	QAFTPSSTMMEVFLQEK	1	2	2	188497756;188497758		0	37583307	0	8.325e-09	71.02	3.73991e-06	2	1973.94	1.75726	67.4262	0
	High	LAQMISDHNDADFEEK	1	2	2	188497756;188497758		0	1.405e+07	0	5.669e-09	69.65	4.05931e-06	2	1862.82	0.364225	35.1375	0
	High	GGSTTGSQFLEQFK	1	2	2	188497756;188497758		0	1.5218e+08	0	1.013e-05	59.04	5.78162e-05	2	1486.72	0.260753	51.7525	0
	High	DGSLASNPYSGDLTK	1	2	2	188497756;188497758		0	1.43489e+08	0	1.296e-06	58.9	5.30759e-05	2	1524.71	-1.923	37.8858	0
	High	IDLAVLLGK	1	2	2	188497756;188497758		0	5.93874e+07	0	0.0002332	54.8	3.34442e-05	2	941.604	1.06224	64.0284	0
	High	SQTSSIPQKPQTNK	1	1	1	188497758		0	2.11267e+07	0	0.0002723	52.02	0.000269123	2	1543.81	-1.482	13.9672	0
	High	GNWEQPQNQNQTQHK	1	2	2	188497756;188497758		0	1.34306e+07	0	5.581e-06	47.27	0.000804373	2	1836.84	-0.888709	15.0181	0
	High	TATEEWGTEDWNEDLSETK	1	2	2	188497756;188497758		0	3.84269e+06	0	8.175e-07	39.62	0.00221562	2	2240.94	-2.44611	53.8449	0
	High	IFTASNVSSVPLPAENVTITAGQR	1	2	2	188497756;188497758		0	1.09977e+08	0	2.534e-06	39.36	0.00420636	3	2472.31	0.234346	59.7075	0
	High	SPAVATSTAAPPPPSSPLPSK	1	2	2	188497756;188497758		0	1.15005e+08	0	4.593e-07	38.66	0.00587463	2	1960.04	0.530168	35.3759	0
	High	NPSDSAVHSPFTK	2	2	2	188497756;188497758		0	1.9914e+08	0	7.055e-05	37.93	0.00642648	2	1386.66	-0.989103	26.3183	0
	High	QRPQATAEQIR	1	2	2	188497756;188497758		0	8.37517e+07	0	0.0002714	36.89	0.0064463	2	1297.7	-1.12121	14.7563	0
	High	FPLDYYSIPFPTPTTPLTGR	3	2	2	188497756;188497758		0	4.75017e+07	0	8.224e-07	34.52	0.0160522	2	2283.17	0.87911	69.8844	0
	High	RYPSSISSSPQK	1	2	2	188497756;188497758		0	8.8558e+07	0	0.0001217	33.73	0.0207797	2	1336.68	-1.27615	16.4878	1
	High	QTAISQPASGNTFSHHSMVSMLGK	1	2	2	188497756;188497758		0	4.13483e+07	0	8.135e-05	12.06	3.52533	3	2516.2	-1.15587	43.1896	0
302699239	eukaryotic translation initiation factor 4 gamma 1 isoform 4 [Homo sapiens]	391.721	20.23	6	19	23	26	8.41502e+07	1404	154.837	5.16064
	A4	Sequence	# PSMs	# Proteins	# Protein Groups	Protein Group Accessions	Modifications	ΔCn	Area	q-Value	PEP	IonScore	Exp Value	Charge	MH+ [Da]	ΔM [ppm]	RT [min]	# Missed Cleavages
	High	LQGINcGPDFTPSFANLGR	1	6	1	302699239	C6(Carbamidomethyl)	0	1.59783e+07	0	5.124e-09	102.32	3.13584e-09	2	2064.01	4.86832	61.3578	0
	High	MLTEAIMHDcVVK	1	9	2	302699239;10092601	C10(Carbamidomethyl)	0	3.49863e+07	0	1.044e-07	76.74	9.29961e-07	2	1546.74	-1.0932	44.5997	0
	High	EFLPEGQDIGAFVAEQK	1	6	1	302699239		0	0	0	3.809e-09	67.73	1.04651e-05	2	1877.93	0.430957	61.4845	0
	High	FMLQDVLDLR	1	9	2	302699239;10092601		0	4.51995e+07	0	3.995e-05	54.61	0.000150311	2	1249.66	2.20266	68.377	0
	High	GLPLVDDGGWNTVPISK	1	6	1	302699239		0	71068290	0	8.428e-08	53.92	0.000166258	2	1767.93	1.30545	62.0041	0
	High	VFDWIEANLSEQQIVSNTLVR	1	6	1	302699239		0	6.86055e+06	0	1.859e-08	53.47	0.000177663	3	2461.28	2.49634	69.8818	0
	High	EAVGDLLDAFK	2	6	1	302699239		0	4.54296e+07	0	0.0001079	51.31	0.000332822	1	1177.61	1.85233	63.967	0
	High	VEYTLGEESEAPGQR	1	6	1	302699239		0	2.39674e+07	0	2.163e-05	49.03	0.000538237	2	1664.77	-1.90561	33.2467	0
	High	ITKPGSIDSNNQLFAPGGR	2	6	1	302699239		0	9.88033e+07	0	5.965e-08	44.08	0.00183109	2	1972.02	-1.08046	38.8504	0
	High	NHDEESLEcLcR	1	9	2	302699239;10092601	C9(Carbamidomethyl); C11(Carbamidomethyl)	0	1.08232e+07	0	3.936e-05	43.46	0.000466595	2	1561.64	0.222459	29.2624	0
	High	GVIDLIFEK	1	6	1	302699239		0	7.90024e+06	0	0.0004086	35.48	0.00737578	2	1033.59	0.886517	64.0742	0
	High	LKEELEEAR	1	6	1	302699239		0	2.19895e+07	0	0.001833	34.97	0.0131826	2	1116.59	-1.04317	18.084	1
	High	AIIEEYLHLNDMK	1	6	1	302699239		0	1.58347e+07	0	3.052e-05	32.78	0.0269678	2	1588.81	3.21519	59.1892	0
	High	VPTTEKPTVTVNFR	1	6	1	302699239		0	8.2579e+07	0	4.264e-05	24.71	0.133367	3	1588.87	0.625715	36.0117	0
	High	GPQAGLGPR	1	2	1	302699239		0	3.6312e+06	0	0.001879	24.15	0.0921097	1	852.467	-1.99575	15.7343	0
	High	ERPSQPEGLR	1	6	1	302699239		0	2.53613e+07	0	0.002507	20.58	0.307119	2	1168.61	-1.14057	14.4864	0
	High	AISEPNFSVAYANMcR	1	6	1	302699239	C15(Carbamidomethyl)	0	1.00122e+07	0	0.0002609	11.49	2.62899	2	1829.83	0.258602	55.7309	0
	High	HGVESTLER	1	6	1	302699239		0	2.83943e+07	0.001	0.01841	25.84	0.0738845	2	1027.52	-1.27769	14.8865	0
	High	VQQLMAK	1	6	1	302699239		0	9.93198e+06	0.001	0.01925	21.26	0.34341	2	817.459	-1.13431	16.7505	0
	High	GGPPGPPISR	2	6	1	302699239		0	51120796	0.001	0.01056	17.46	0.725072	1	934.512	1.57583	22.0062	0
	High	TPLRPLDPTR	1	6	1	302699239		0	6.40695e+07	0.002	0.02784	12.75	0.971519	3	1165.67	-1.37375	26.2568	0
	High	GSNWVPR	1	6	1	302699239		0	2.19334e+07	0.005	0.07217	27.14	0.0397019	2	815.416	-0.475086	24.9882	0
	Medium	FIGELFK	1	9	2	302699239;10092601		0	2.55491e+07	0.013	0.1751	21.2	0.142992	2	853.482	-0.0740648	52.6205	0
103472005	antigen KI-67 isoform 1 [Homo sapiens]	391.195	14.93	2	30	30	33	7.97192e+07	3256	358.474	9.45166
	A4	Sequence	# PSMs	# Proteins	# Protein Groups	Protein Group Accessions	Modifications	ΔCn	Area	q-Value	PEP	IonScore	Exp Value	Charge	MH+ [Da]	ΔM [ppm]	RT [min]	# Missed Cleavages
	High	TPVQYSQQQNSPQK	1	1	1	103472005		0	6.78717e+06	0	1.41e-07	85.05	1.55522e-07	2	1632.8	-1.49908	16.499	0
	High	LDLLGNLPGSK	2	2	1	103472005		0	4.25393e+07	0	9.365e-06	69.2	2.56082e-06	2	1126.65	0.59927	56.1977	0
	High	IPcESPPLEVVDTTASTK	1	2	1	103472005	C3(Carbamidomethyl)	0	1.27728e+07	0	2.595e-08	61.58	3.58633e-05	2	1943.96	-0.535797	48.8945	0
	High	DINTFLGTPVQK	1	2	1	103472005		0	2.79016e+07	0	0.0001263	55.7	0.000129597	2	1332.72	0.378845	50.1654	0
	High	SPQPDPVGTPTIFKPQSK	1	2	1	103472005		0	8.06911e+06	0	0.0003646	51.6	0.000307865	2	1924.01	-4.58767	40.752	0
	High	AQALEDLAGFK	2	2	1	103472005		0	6.94869e+07	0	0.0002253	48.92	0.000663606	1	1162.61	-0.507547	49.809	0
	High	ALEDLVDFK	1	2	1	103472005		0	7.43029e+06	0	0.001994	43.9	0.001656	2	1049.55	0.259197	56.2801	0
	High	LTQTSGETTHTDK	1	2	1	103472005		0	0	0	9.475e-05	41.72	0.00260778	2	1418.67	-1.11327	8.42747	0
	High	NIYAFMGTPVQK	1	2	1	103472005		0	17824269	0	8.791e-05	39.86	0.00494693	2	1368.7	0.0558311	51.8997	0
	High	DIVEELSALK	1	2	1	103472005		0	8.26453e+06	0	0.0001903	39.57	0.00487451	2	1116.62	1.24946	62.0428	0
	High	VEDAADSATKPENLSSK	1	1	1	103472005		0	0	0	1.722e-06	37.5	0.00932708	2	1761.85	-0.516808	19.3294	0
	High	ELFQTPGHTEEAVAAGK	1	2	1	103472005		0	1.18439e+07	0	6.424e-07	36.08	0.0137482	2	1784.88	1.61559	35.6801	0
	High	ELFQTPGPSEESMTDEK	1	2	1	103472005		0	5.33099e+06	0	9.754e-05	35.24	0.00954532	2	1924.85	-0.0474013	44.3301	0
	High	TSPEMDIQNPDDGAR	1	2	1	103472005		0	5740328	0	2.159e-05	34.86	0.00615618	2	1645.71	-2.67238	31.0037	0
	High	LTQTSGETTHTDKEPVGEGK	1	2	1	103472005		0	1210918	0	8.199e-06	32.82	0.0276086	3	2115.01	-2.68691	13.8805	1
	High	RIEPAEELNSNDMK	1	2	1	103472005		0	0	0	0.0002505	31.89	0.0267917	2	1645.78	-1.42112	29.9633	1
	High	SLVMHTPPVLK	1	2	1	103472005		0	1.76419e+07	0	0.001352	30.68	0.0179136	2	1221.7	-1.40796	39.8712	0
	High	LDPAASVTGSK	1	2	1	103472005		0	2.62745e+06	0	0.0002561	29.19	0.0606133	1	1045.55	0.134871	24.2838	0
	High	ELFSAPGHTEESMTIDK	1	2	1	103472005		0	2.12188e+06	0	0.001174	27.9	0.0754142	2	1891.87	0.19562	42.1921	0
	High	ELFQTPcTDNPTTDEK	1	2	1	103472005	C7(Carbamidomethyl)	0	8.70986e+06	0	0.0001514	26.41	0.0659395	2	1895.83	-0.0717889	39.2676	0
	High	EEAQSLEDLAGFK	1	2	1	103472005		0	2.08602e+07	0	4.852e-05	24.55	0.154331	2	1436.69	1.55444	54.4498	0
[truncated: 11,320 more rows]

## Sheet: MCF7_Ctrl_02
Accession	Description	Score	Coverage	# Proteins	# Unique Peptides	# Peptides	# PSMs	Area	# AAs	MW [kDa]	calc. pI
[truncated: 4,138 more rows]

[truncated: 1 more sheets: MCF7_Sample_02]
